# Supplementary material for: Rab10 regulates neuropeptide release by maintaining Ca2+ homeostasis and protein synthesis
Source: eLife. 2025 Apr 2;13:RP94930. doi: 10.7554/eLife.94930 (PMC11964448; doi:10.7554/eLife.94930)
Supplement: Figure 3—source data 1. [file elife-94930-fig3-data1.xlsx]

## Sheet: legend
Legend
This data table contains the results from statistical analyses, each row describes one protein(group).
The first few columns describe the protein metadata; the protein accessions together with the respective descriptions and gene symbol(s) as listed in the provided fasta file. If no gene symbol is provided in the fasta file for a protein, the 'gene_symbols_or_id' column simply contains the value from 'protein_id'.
The next set of columns describe the results from each contrast (comparison of sample groups).
'peptides_used_for_dea' shows the number of peptides that pass the filter rules within some contrast (eg; comparing WT vs KO, how many peptides for protein P could be used for statistical analysis?).
For each statistical model applied (eBayes, MSqRob, etc.), the log2 foldchange, pvalue and qvalue (adjusted pvalue) are provided.
If multiple DEA models were applied, the column signif_count_<contrast> shows how many algorithms deemed each protein significant.
If you choose to post-hoc combine results from multiple DEA models, we recommend selecting proteins significant in at least 2 of these algorithms as a compromise between using multiple algorithms to maximize your search for proteins-of-interest and robustness against false positives (eg; proteins uniquely scoring well in one statistical model and not the others).
Note; if you apply multiple DEA algorithms but don't follow this selection rule (eg; protein found in N+ DEA algorithms), you should apply some form of multiple-testing-correction to compensate for running multiple hypotheses tests. Consult your local statistician.
After the differential expression analysis results, qualitative data shows in how many replicates within each group peptides were identified (MS/MS for DDA, identification confidence < x for DIA).
'count_peptides_detected_within_group_<sample group>' shows how many time a peptide for the protein on this row was detected over all replicates within a group (for each sample, count unique detected peptides, then sum for all replicates within group). So if a protein has 3 peptides in total and there are 4 replicates in a group, this is at most 12.
This is pseudo-count data, intended to be used for qualitative analysis when peptide abundances for a protein are absent in one sample group (or quantified in too few replicates to use for differential expression analysis).
For instance, in a 'WT vs KO' comparison one should see no (or very few) such peptide detections in the KO for the target protein and many more in the WT sample group.
Differential Detection:
Compute a z-score for each protein based on the total number of detected peptides per sample group.
To easily prioritize proteins-of-interest, some which may not have sufficient abundance values for differential expression analysis but that do have many more detects in one sample group than the other, we provide a simple score based on identification count data.
This is a simplified approach that is intended to rank proteins for further qualitative analysis, be careful of over-interpretation and keep differences in sample group size (#replicates) and the absolute amount of peptides identified in a sample in mind !
columns that start with 'diff_detect_zscore_contrast:' contain the z-scores for each contrast (only for proteins observed in at least N samples samples in either group, to exclude one-hit-wonders)
Please refer to the online documentation for further details: https://github.com/ftwkoopmans/msdap

## Sheet: statistics
protein_id	accessions	fasta_headers	gene_symbols_or_id	unique_peptides	peptides_used_for_dea_contrast: scr vs r	foldchange.log2_deqms_contrast: scr vs r	pvalue_deqms_contrast: scr vs r	qvalue_deqms_contrast: scr vs r	signif_deqms_contrast: scr vs r	count_peptides_detected_within_group__r	count_peptides_detected_within_group__scr	zscore_count_detect__contrast: scr vs r
P84086	P84086	>sp|P84086|CPLX2_MOUSE Complexin-2 OS=Mus musculus (Mouse) OX=10090 GN=Cplx2 PE=1 SV=1	CPLX2	1	1	-1.66092	4.12977e-10	1.31521e-08	TRUE	10	8	0.266117
Q62443	Q62443	>sp|Q62443|NPTX1_MOUSE Neuronal pentraxin-1 OS=Mus musculus (Mouse) OX=10090 GN=Nptx1 PE=1 SV=1	NPTX1	8	4	-1.10006	8.0703e-09	1.4004e-07	TRUE	58	55	-0.0560744
P35278	P35278	>sp|P35278|RAB5C_MOUSE Ras-related protein Rab-5C OS=Mus musculus (Mouse) OX=10090 GN=Rab5c PE=1 SV=2	RAB5C	6	5	-0.0216845	0.795927	0.847367	FALSE	57	45	0.324727
O35495;Q04735	O35495;Q04735	>sp|O35495|CDK14_MOUSE Cyclin-dependent kinase 14 OS=Mus musculus (Mouse) OX=10090 GN=Cdk14 PE=1 SV=2;>sp|Q04735|CDK16_MOUSE Cyclin-dependent kinase 16 OS=Mus musculus (Mouse) OX=10090 GN=Cdk16 PE=1 SV=1	CDK14;CDK16	1	0					7	6	0.158353
Q8CHG7	Q8CHG7	>sp|Q8CHG7|RPGF2_MOUSE Rap guanine nucleotide exchange factor 2 OS=Mus musculus (Mouse) OX=10090 GN=Rapgef2 PE=1 SV=2	RAPGEF2	26	0					54	176	-2.57814
Q99J85	Q99J85	>sp|Q99J85|NPTXR_MOUSE Neuronal pentraxin receptor OS=Mus musculus (Mouse) OX=10090 GN=Nptxr PE=1 SV=1	NPTXR	12	8	-0.820819	2.64797e-09	5.78069e-08	TRUE	90	90	-0.153141
Q08460	Q08460	>sp|Q08460|KCMA1_MOUSE Calcium-activated potassium channel subunit alpha-1 OS=Mus musculus (Mouse) OX=10090 GN=Kcnma1 PE=1 SV=2	KCNMA1	14	6	-0.488213	2.63467e-06	1.77414e-05	TRUE	85	94	-0.378274
Q6P9Q6	Q6P9Q6	>sp|Q6P9Q6|FKB15_MOUSE FK506-binding protein 15 OS=Mus musculus (Mouse) OX=10090 GN=Fkbp15 PE=1 SV=2	FKBP15	12	1	-1.31943	5.76949e-06	3.51361e-05	TRUE	32	50	-1.03908
Q8R191	Q8R191	>sp|Q8R191|SNG3_MOUSE Synaptogyrin-3 OS=Mus musculus (Mouse) OX=10090 GN=Syngr3 PE=1 SV=1	SYNGR3	4	3	-0.161084	0.0366767	0.0695996	FALSE	36	31	0.142011
P63101;P68254;Q9CQV8	P63101;P68254;Q9CQV8	>sp|P63101|1433Z_MOUSE 14-3-3 protein zeta/delta OS=Mus musculus (Mouse) OX=10090 GN=Ywhaz PE=1 SV=1;>sp|P68254|1433T_MOUSE 14-3-3 protein theta OS=Mus musculus (Mouse) OX=10090 GN=Ywhaq PE=1 SV=1;>sp|Q9CQV8|1433B_MOUSE 14-3-3 protein beta/alpha OS=Mus musculus (Mouse) OX=10090 GN=Ywhab PE=1 SV=3	YWHAZ;YWHAQ;YWHAB	3	1	-2.1889	0.00258515	0.00689798	TRUE	24	18	0.413946
P0C7L0	P0C7L0	>sp|P0C7L0|WIPF3_MOUSE WAS/WASL-interacting protein family member 3 OS=Mus musculus (Mouse) OX=10090 GN=Wipf3 PE=1 SV=1	WIPF3	6	2	-2.13148	5.87126e-11	2.87418e-09	TRUE	28	44	-1.05664
P11798	P11798	>sp|P11798|KCC2A_MOUSE Calcium/calmodulin-dependent protein kinase type II subunit alpha OS=Mus musculus (Mouse) OX=10090 GN=Camk2a PE=1 SV=2	CAMK2A	15	13	-0.85287	1.87466e-06	1.32499e-05	TRUE	139	114	0.253853
Q9QVP9	Q9QVP9	>sp|Q9QVP9|FAK2_MOUSE Protein-tyrosine kinase 2-beta OS=Mus musculus (Mouse) OX=10090 GN=Ptk2b PE=1 SV=2	PTK2B	25	12	-0.34407	0.00616075	0.014937	FALSE	167	171	-0.208735
Q0VBF8	Q0VBF8	>sp|Q0VBF8|STUM_MOUSE Protein stum homolog OS=Mus musculus (Mouse) OX=10090 GN=Stum PE=1 SV=1	STUM	1	1	-1.62925	4.17059e-06	2.6533e-05	TRUE	9	8	0.0775288
O08919	O08919	>sp|O08919|NUMBL_MOUSE Numb-like protein OS=Mus musculus (Mouse) OX=10090 GN=Numbl PE=1 SV=3	NUMBL	8	4	-0.538872	3.74975e-05	0.000174709	TRUE	64	57	0.071958
E9Q3M9	E9Q3M9	>tr|E9Q3M9|E9Q3M9_MOUSE DUF4592 domain-containing protein OS=Mus musculus (Mouse) OX=10090 GN=2010300C02Rik PE=1 SV=1	2010300C02RIK	10	1	-0.638247	0.000750272	0.00234932	TRUE	45	63	-0.838148
Q9Z140	Q9Z140	>sp|Q9Z140|CPNE6_MOUSE Copine-6 OS=Mus musculus (Mouse) OX=10090 GN=Cpne6 PE=1 SV=1	CPNE6	13	9	-0.665268	1.05846e-06	8.17476e-06	TRUE	99	96	-0.0894456
Q61792	Q61792	>sp|Q61792|LASP1_MOUSE LIM and SH3 domain protein 1 OS=Mus musculus (Mouse) OX=10090 GN=Lasp1 PE=1 SV=1	LASP1	12	8	-0.79948	7.6931e-08	9.11389e-07	TRUE	88	86	-0.108287
Q5FWK3	Q5FWK3	>sp|Q5FWK3|RHG01_MOUSE Rho GTPase-activating protein 1 OS=Mus musculus (Mouse) OX=10090 GN=Arhgap1 PE=1 SV=1	ARHGAP1	14	11	-1.01257	2.50899e-13	7.82995e-11	TRUE	117	107	0.00985977
P16627;P17156;P63017	P16627;P17156;P63017	>sp|P16627|HS71L_MOUSE Heat shock 70 kDa protein 1-like OS=Mus musculus (Mouse) OX=10090 GN=Hspa1l PE=1 SV=4;>sp|P17156|HSP72_MOUSE Heat shock-related 70 kDa protein 2 OS=Mus musculus (Mouse) OX=10090 GN=Hspa2 PE=1 SV=2;>sp|P63017|HSP7C_MOUSE Heat shock cognate 71 kDa protein OS=Mus musculus (Mouse) OX=10090 GN=Hspa8 PE=1 SV=1	HSPA1L;HSPA2;HSPA8	3	1	-2.04449	0.0013367	0.00385761	TRUE	24	17	0.494232
Q8CAY6	Q8CAY6	>sp|Q8CAY6|THIC_MOUSE Acetyl-CoA acetyltransferase, cytosolic OS=Mus musculus (Mouse) OX=10090 GN=Acat2 PE=1 SV=2	ACAT2	8	8	-0.00958199	0.872086	0.906863	FALSE	80	64	0.30325
Q8BGZ1	Q8BGZ1	>sp|Q8BGZ1|HPCL4_MOUSE Hippocalcin-like protein 4 OS=Mus musculus (Mouse) OX=10090 GN=Hpcal4 PE=1 SV=3	HPCAL4	7	3	-0.747947	2.93924e-05	0.000141827	TRUE	51	48	-0.0275201
Q9R111	Q9R111	>sp|Q9R111|GUAD_MOUSE Guanine deaminase OS=Mus musculus (Mouse) OX=10090 GN=Gda PE=1 SV=1	GDA	22	16	-1.12463	3.97467e-10	1.28855e-08	TRUE	180	164	0.0391019
P58771	P58771	>sp|P58771|TPM1_MOUSE Tropomyosin alpha-1 chain OS=Mus musculus (Mouse) OX=10090 GN=Tpm1 PE=1 SV=1	TPM1	5	2	-0.884527	1.02761e-06	7.99909e-06	TRUE	20	28	-0.838392
Q8BWF0	Q8BWF0	>sp|Q8BWF0|SSDH_MOUSE Succinate-semialdehyde dehydrogenase, mitochondrial OS=Mus musculus (Mouse) OX=10090 GN=Aldh5a1 PE=1 SV=1	ALDH5A1	14	12	-0.467196	1.4246e-07	1.53032e-06	TRUE	127	106	0.213607
Q8R0Y8	Q8R0Y8	>sp|Q8R0Y8|S2542_MOUSE Mitochondrial coenzyme A transporter SLC25A42 OS=Mus musculus (Mouse) OX=10090 GN=Slc25a42 PE=1 SV=1	SLC25A42	8	2	-0.661106	2.78495e-05	0.000135469	TRUE	36	50	-0.808426
P84075	P84075	>sp|P84075|HPCA_MOUSE Neuron-specific calcium-binding protein hippocalcin OS=Mus musculus (Mouse) OX=10090 GN=Hpca PE=1 SV=2	HPCA	4	2	-1.30439	5.47156e-05	0.00024182	TRUE	28	29	-0.246573
Q8C729	Q8C729	>sp|Q8C729|F126B_MOUSE Protein FAM126B OS=Mus musculus (Mouse) OX=10090 GN=Fam126b PE=1 SV=1	FAM126B	11	5	-0.354697	0.000274141	0.000973246	TRUE	76	71	-0.0235947
Q8K596	Q8K596	>sp|Q8K596|NAC2_MOUSE Sodium/calcium exchanger 2 OS=Mus musculus (Mouse) OX=10090 GN=Slc8a2 PE=1 SV=1	SLC8A2	23	12	-0.328169	0.0153584	0.0332468	FALSE	160	148	0.00275303
Q6ZQK5	Q6ZQK5	>sp|Q6ZQK5|ACAP2_MOUSE Arf-GAP with coiled-coil, ANK repeat and PH domain-containing protein 2 OS=Mus musculus (Mouse) OX=10090 GN=Acap2 PE=1 SV=2	ACAP2	10	6	-0.891887	8.07306e-12	6.62236e-10	TRUE	69	69	-0.153979
Q8BU31	Q8BU31	>sp|Q8BU31|RAP2C_MOUSE Ras-related protein Rap-2c OS=Mus musculus (Mouse) OX=10090 GN=Rap2c PE=1 SV=1	RAP2C	3	2	-0.0963382	0.318294	0.42092	FALSE	25	18	0.502072
P31650	P31650	>sp|P31650|S6A11_MOUSE Sodium- and chloride-dependent GABA transporter 3 OS=Mus musculus (Mouse) OX=10090 GN=Slc6a11 PE=1 SV=2	SLC6A11	12	3	-2.67647	5.93067e-18	3.21087e-14	TRUE	55	80	-0.929759
P21271;Q99104	P21271;Q99104	>sp|P21271|MYO5B_MOUSE Unconventional myosin-Vb OS=Mus musculus (Mouse) OX=10090 GN=Myo5b PE=1 SV=2;>sp|Q99104|MYO5A_MOUSE Unconventional myosin-Va OS=Mus musculus (Mouse) OX=10090 GN=Myo5a PE=1 SV=2	MYO5B;MYO5A	4	2	-0.199039	0.317197	0.419572	FALSE	33	27	0.252368
O55042;Q91ZZ3	O55042;Q91ZZ3	>sp|O55042|SYUA_MOUSE Alpha-synuclein OS=Mus musculus (Mouse) OX=10090 GN=Snca PE=1 SV=2;>sp|Q91ZZ3|SYUB_MOUSE Beta-synuclein OS=Mus musculus (Mouse) OX=10090 GN=Sncb PE=1 SV=1	SNCA;SNCB	2	2	-1.11389	0.00218639	0.00594232	TRUE	20	16	0.286542
Q14BI1	Q14BI1	>tr|Q14BI1|Q14BI1_MOUSE Slc24a2 protein OS=Mus musculus (Mouse) OX=10090 GN=Slc24a2 PE=1 SV=1	SLC24A2	3	1	-0.35434	0.0107391	0.0243677	FALSE	22	20	0.030468
P63040;P84086	P63040;P84086	>sp|P63040|CPLX1_MOUSE Complexin-1 OS=Mus musculus (Mouse) OX=10090 GN=Cplx1 PE=1 SV=1;>sp|P84086|CPLX2_MOUSE Complexin-2 OS=Mus musculus (Mouse) OX=10090 GN=Cplx2 PE=1 SV=1	CPLX1;CPLX2	3	2	-1.26094	1.31191e-06	9.75643e-06	TRUE	23	21	0.0294124
Q8VHQ9	Q8VHQ9	>sp|Q8VHQ9|ACO11_MOUSE Acyl-coenzyme A thioesterase 11 OS=Mus musculus (Mouse) OX=10090 GN=Acot11 PE=1 SV=1	ACOT11	12	0					10	76	-4.24813
Q9DBF7	Q9DBF7	>sp|Q9DBF7|CWC25_MOUSE Pre-mRNA-splicing factor CWC25 homolog OS=Mus musculus (Mouse) OX=10090 GN=Cwc25 PE=2 SV=2	CWC25	1	0					7	7	-0.127975
Q9QXG2	Q9QXG2	>sp|Q9QXG2|RAE1_MOUSE Rab proteins geranylgeranyltransferase component A 1 OS=Mus musculus (Mouse) OX=10090 GN=Chm PE=1 SV=1	CHM	5	1	-1.25964	2.99864e-08	4.22777e-07	TRUE	20	37	-1.39342
P46096;P46097	P46096;P46097	>sp|P46096|SYT1_MOUSE Synaptotagmin-1 OS=Mus musculus (Mouse) OX=10090 GN=Syt1 PE=1 SV=1;>sp|P46097|SYT2_MOUSE Synaptotagmin-2 OS=Mus musculus (Mouse) OX=10090 GN=Syt2 PE=1 SV=1	SYT1;SYT2	4	4	-0.986365	1.91104e-11	1.23171e-09	TRUE	40	32	0.297538
P12657	P12657	>sp|P12657|ACM1_MOUSE Muscarinic acetylcholine receptor M1 OS=Mus musculus (Mouse) OX=10090 GN=Chrm1 PE=1 SV=2	CHRM1	2	2	0.517838	0.00124976	0.00365346	TRUE	19	14	0.438278
E9QA15	E9QA15	>tr|E9QA15|E9QA15_MOUSE Caldesmon 1 OS=Mus musculus (Mouse) OX=10090 GN=Cald1 PE=1 SV=1	CALD1	19	0					13	88	-4.0513
Q8CAA7	Q8CAA7	>sp|Q8CAA7|PGM2L_MOUSE Glucose 1,6-bisphosphate synthase OS=Mus musculus (Mouse) OX=10090 GN=Pgm2l1 PE=1 SV=1	PGM2L1	20	10	-0.881285	1.75703e-07	1.83286e-06	TRUE	155	146	-0.0440791
Q8R1Q8	Q8R1Q8	>sp|Q8R1Q8|DC1L1_MOUSE Cytoplasmic dynein 1 light intermediate chain 1 OS=Mus musculus (Mouse) OX=10090 GN=Dync1li1 PE=1 SV=1	DYNC1LI1	22	21	-0.117081	0.0352347	0.0673827	FALSE	210	166	0.329549
O35316	O35316	>sp|O35316|SC6A6_MOUSE Sodium- and chloride-dependent taurine transporter OS=Mus musculus (Mouse) OX=10090 GN=Slc6a6 PE=1 SV=2	SLC6A6	3	2	-1.46721	3.46251e-10	1.15716e-08	TRUE	21	17	0.277761
E9PW37	E9PW37	>tr|E9PW37|E9PW37_MOUSE RAS protein activator-like 2 OS=Mus musculus (Mouse) OX=10090 GN=Rasal2 PE=1 SV=1	RASAL2	6	0					17	44	-2.02127
P11798;P28652;Q6PHZ2	P11798;P28652;Q6PHZ2	>sp|P11798|KCC2A_MOUSE Calcium/calmodulin-dependent protein kinase type II subunit alpha OS=Mus musculus (Mouse) OX=10090 GN=Camk2a PE=1 SV=2;>sp|P28652|KCC2B_MOUSE Calcium/calmodulin-dependent protein kinase type II subunit beta OS=Mus musculus (Mouse) OX=10090 GN=Camk2b PE=1 SV=2;>sp|Q6PHZ2|KCC2D_MOUSE Calcium/calmodulin-dependent protein kinase type II subunit delta OS=Mus musculus (Mouse) OX=…	CAMK2A;CAMK2B;CAMK2D	2	1	-1.16654	0.000554999	0.00179926	TRUE	15	13	0.124977
Q9JIA1	Q9JIA1	>sp|Q9JIA1|LGI1_MOUSE Leucine-rich glioma-inactivated protein 1 OS=Mus musculus (Mouse) OX=10090 GN=Lgi1 PE=1 SV=1	LGI1	12	2	-2.7013	3.18173e-13	7.82995e-11	TRUE	40	86	-1.73763
O35295;P42669;Q8R4E6	O35295;P42669;Q8R4E6	>sp|O35295|PURB_MOUSE Transcriptional activator protein Pur-beta OS=Mus musculus (Mouse) OX=10090 GN=Purb PE=1 SV=3;>sp|P42669|PURA_MOUSE Transcriptional activator protein Pur-alpha OS=Mus musculus (Mouse) OX=10090 GN=Pura PE=1 SV=1;>sp|Q8R4E6|PURG_MOUSE Purine-rich element-binding protein gamma OS=Mus musculus (Mouse) OX=10090 GN=Purg PE=1 SV=1	PURB;PURA;PURG	1	1	-0.0847182	0.390176	0.495406	FALSE	10	8	0.266117
Q8R4E6	Q8R4E6	>sp|Q8R4E6|PURG_MOUSE Purine-rich element-binding protein gamma OS=Mus musculus (Mouse) OX=10090 GN=Purg PE=1 SV=1	PURG	6	3	0.157297	0.42828	0.532742	FALSE	56	33	0.933387
Q9EPC1	Q9EPC1	>sp|Q9EPC1|PARVA_MOUSE Alpha-parvin OS=Mus musculus (Mouse) OX=10090 GN=Parva PE=1 SV=1	PARVA	8	2	-0.768876	4.94018e-06	3.07074e-05	TRUE	37	42	-0.412481
Q8K1C0	Q8K1C0	>sp|Q8K1C0|ANGE2_MOUSE Protein angel homolog 2 OS=Mus musculus (Mouse) OX=10090 GN=Angel2 PE=1 SV=1	ANGEL2	1	0					6	7	-0.472252
P61226	P61226	>sp|P61226|RAP2B_MOUSE Ras-related protein Rap-2b OS=Mus musculus (Mouse) OX=10090 GN=Rap2b PE=1 SV=1	RAP2B	5	5	0.11975	0.0603987	0.105654	FALSE	50	39	0.354899
Q64010	Q64010	>sp|Q64010|CRK_MOUSE Adapter molecule crk OS=Mus musculus (Mouse) OX=10090 GN=Crk PE=1 SV=1	CRK	13	11	-0.532284	7.79453e-09	1.36128e-07	TRUE	113	96	0.183328
O08586	O08586	>sp|O08586|PTEN_MOUSE Phosphatidylinositol 3,4,5-trisphosphate 3-phosphatase and dual-specificity protein phosphatase PTEN OS=Mus musculus (Mouse) OX=10090 GN=Pten PE=1 SV=1	PTEN	8	4	-0.537349	1.62081e-07	1.70389e-06	TRUE	58	55	-0.0592374
P46096	P46096	>sp|P46096|SYT1_MOUSE Synaptotagmin-1 OS=Mus musculus (Mouse) OX=10090 GN=Syt1 PE=1 SV=1	SYT1	16	10	-0.825111	4.6761e-09	8.96993e-08	TRUE	110	106	-0.074979
Q9R226	Q9R226	>sp|Q9R226|KHDR3_MOUSE KH domain-containing, RNA-binding, signal transduction-associated protein 3 OS=Mus musculus (Mouse) OX=10090 GN=Khdrbs3 PE=1 SV=1	KHDRBS3	5	3	-0.177224	0.148523	0.227534	FALSE	42	37	0.0940959
P97333	P97333	>sp|P97333|NRP1_MOUSE Neuropilin-1 OS=Mus musculus (Mouse) OX=10090 GN=Nrp1 PE=1 SV=2	NRP1	25	11	-1.07655	2.51843e-10	8.97024e-09	TRUE	154	165	-0.307109
Q9DB72	Q9DB72	>sp|Q9DB72|BTBDH_MOUSE BTB/POZ domain-containing protein 17 OS=Mus musculus (Mouse) OX=10090 GN=Btbd17 PE=1 SV=1	BTBD17	7	1	-1.5083	3.50715e-07	3.2569e-06	TRUE	19	40	-1.64672
E9Q1C1	E9Q1C1	>tr|E9Q1C1|E9Q1C1_MOUSE G_PROTEIN_RECEP_F3_4 domain-containing protein OS=Mus musculus (Mouse) OX=10090 GN=Vmn2r118 PE=3 SV=1	VMN2R118	1	1	-0.817354	0.00303518	0.00793457	TRUE	10	7	0.53156
P61226;Q80ZJ1;Q8BU31	P61226;Q80ZJ1;Q8BU31	>sp|P61226|RAP2B_MOUSE Ras-related protein Rap-2b OS=Mus musculus (Mouse) OX=10090 GN=Rap2b PE=1 SV=1;>sp|Q80ZJ1|RAP2A_MOUSE Ras-related protein Rap-2a OS=Mus musculus (Mouse) OX=10090 GN=Rap2a PE=1 SV=2;>sp|Q8BU31|RAP2C_MOUSE Ras-related protein Rap-2c OS=Mus musculus (Mouse) OX=10090 GN=Rap2c PE=1 SV=1	RAP2B;RAP2A;RAP2C	5	3	0.0278864	0.664387	0.740426	FALSE	41	38	-0.0141499
Q8K021	Q8K021	>sp|Q8K021|SCAM1_MOUSE Secretory carrier-associated membrane protein 1 OS=Mus musculus (Mouse) OX=10090 GN=Scamp1 PE=1 SV=1	SCAMP1	7	5	0.0195211	0.834292	0.877911	FALSE	54	46	0.175748
P31938	P31938	>sp|P31938|MP2K1_MOUSE Dual specificity mitogen-activated protein kinase kinase 1 OS=Mus musculus (Mouse) OX=10090 GN=Map2k1 PE=1 SV=2	MAP2K1	10	10	-0.251742	0.00155859	0.00441329	FALSE	95	80	0.20202
Q6ZPQ6	Q6ZPQ6	>sp|Q6ZPQ6|PITM2_MOUSE Membrane-associated phosphatidylinositol transfer protein 2 OS=Mus musculus (Mouse) OX=10090 GN=Pitpnm2 PE=1 SV=2	PITPNM2	18	1	-1.36676	1.70988e-06	1.23102e-05	TRUE	60	130	-1.74999
Q9R1T4	Q9R1T4	>sp|Q9R1T4|SEPT6_MOUSE Septin-6 OS=Mus musculus (Mouse) OX=10090 GN=Septin6 PE=1 SV=4	SEPTIN6	6	5	-0.0999925	0.229021	0.323485	FALSE	57	48	0.190003
Q9QZX7	Q9QZX7	>sp|Q9QZX7|SRR_MOUSE Serine racemase OS=Mus musculus (Mouse) OX=10090 GN=Srr PE=1 SV=1	SRR	7	3	-1.29525	2.21303e-12	2.78636e-10	TRUE	48	45	-0.0227475
P09528	P09528	>sp|P09528|FRIH_MOUSE Ferritin heavy chain OS=Mus musculus (Mouse) OX=10090 GN=Fth1 PE=1 SV=2	FTH1	6	1	-1.7252	1.95314e-07	1.98766e-06	TRUE	30	47	-1.0765
Q80Z38	Q80Z38	>sp|Q80Z38|SHAN2_MOUSE SH3 and multiple ankyrin repeat domains protein 2 OS=Mus musculus (Mouse) OX=10090 GN=Shank2 PE=1 SV=2	SHANK2	22	6	-0.890099	1.58731e-06	1.15043e-05	TRUE	118	157	-0.736587
Q80ZJ1	Q80ZJ1	>sp|Q80ZJ1|RAP2A_MOUSE Ras-related protein Rap-2a OS=Mus musculus (Mouse) OX=10090 GN=Rap2a PE=1 SV=2	RAP2A	3	3	0.0903	0.310559	0.412706	FALSE	27	22	0.238588
Q99104	Q99104	>sp|Q99104|MYO5A_MOUSE Unconventional myosin-Va OS=Mus musculus (Mouse) OX=10090 GN=Myo5a PE=1 SV=2	MYO5A	57	50	-0.138986	0.426407	0.530705	FALSE	508	420	0.234639
Q9DB41	Q9DB41	>sp|Q9DB41|GHC2_MOUSE Mitochondrial glutamate carrier 2 OS=Mus musculus (Mouse) OX=10090 GN=Slc25a18 PE=1 SV=4	SLC25A18	7	1	-2.50197	7.84e-12	6.62194e-10	TRUE	22	48	-1.72151
E9Q9B7	E9Q9B7	>tr|E9Q9B7|E9Q9B7_MOUSE ANK_REP_REGION domain-containing protein OS=Mus musculus (Mouse) OX=10090 GN=Kidins220 PE=1 SV=1	KIDINS220	20	8	-0.357588	0.000224442	0.000819393	TRUE	134	122	0.0397286
P46096;P46097;Q9R0N5	P46096;P46097;Q9R0N5	>sp|P46096|SYT1_MOUSE Synaptotagmin-1 OS=Mus musculus (Mouse) OX=10090 GN=Syt1 PE=1 SV=1;>sp|P46097|SYT2_MOUSE Synaptotagmin-2 OS=Mus musculus (Mouse) OX=10090 GN=Syt2 PE=1 SV=1;>sp|Q9R0N5|SYT5_MOUSE Synaptotagmin-5 OS=Mus musculus (Mouse) OX=10090 GN=Syt5 PE=1 SV=1	SYT1;SYT2;SYT5	3	2	-0.733475	4.1806e-07	3.77859e-06	TRUE	25	22	0.100259
Q3UM45	Q3UM45	>sp|Q3UM45|PP1R7_MOUSE Protein phosphatase 1 regulatory subunit 7 OS=Mus musculus (Mouse) OX=10090 GN=Ppp1r7 PE=1 SV=2	PPP1R7	18	10	-0.944427	3.53653e-12	3.7057e-10	TRUE	128	126	-0.126011
Q9CQE5	Q9CQE5	>sp|Q9CQE5|RGS10_MOUSE Regulator of G-protein signaling 10 OS=Mus musculus (Mouse) OX=10090 GN=Rgs10 PE=1 SV=1	RGS10	3	2	-0.799577	1.6782e-07	1.76081e-06	TRUE	23	24	-0.231785
Q8BIZ1	Q8BIZ1	>sp|Q8BIZ1|ANS1B_MOUSE Ankyrin repeat and sterile alpha motif domain-containing protein 1B OS=Mus musculus (Mouse) OX=10090 GN=Anks1b PE=1 SV=3	ANKS1B	11	6	-0.841881	1.94449e-07	1.98483e-06	TRUE	78	78	-0.161258
Q99P58	Q99P58	>sp|Q99P58|RB27B_MOUSE Ras-related protein Rab-27B OS=Mus musculus (Mouse) OX=10090 GN=Rab27b PE=1 SV=3	RAB27B	3	0					16	16	-0.139545
Q99KK2	Q99KK2	>sp|Q99KK2|NEUA_MOUSE N-acylneuraminate cytidylyltransferase OS=Mus musculus (Mouse) OX=10090 GN=Cmas PE=1 SV=2	CMAS	14	11	0.52151	1.249e-05	6.7486e-05	TRUE	127	99	0.357158
Q9R1V7	Q9R1V7	>sp|Q9R1V7|ADA23_MOUSE Disintegrin and metalloproteinase domain-containing protein 23 OS=Mus musculus (Mouse) OX=10090 GN=Adam23 PE=1 SV=1	ADAM23	7	3	-0.43765	8.09332e-05	0.000335919	TRUE	50	51	-0.196173
Q62465	Q62465	>sp|Q62465|VAT1_MOUSE Synaptic vesicle membrane protein VAT-1 homolog OS=Mus musculus (Mouse) OX=10090 GN=Vat1 PE=1 SV=3	VAT1	13	12	0.00848228	0.886221	0.9174	FALSE	122	98	0.299126
Q80UG5	Q80UG5	>sp|Q80UG5|SEPT9_MOUSE Septin-9 OS=Mus musculus (Mouse) OX=10090 GN=Septin9 PE=1 SV=1	SEPTIN9	21	8	-1.00149	7.16959e-11	3.34622e-09	TRUE	111	141	-0.645384
Q8K0X8	Q8K0X8	>sp|Q8K0X8|FEZ1_MOUSE Fasciculation and elongation protein zeta-1 OS=Mus musculus (Mouse) OX=10090 GN=Fez1 PE=1 SV=2	FEZ1	4	1	-0.611635	0.000491699	0.0016242	TRUE	19	23	-0.580379
P11798;P28652;Q6PHZ2;Q923T9	P11798;P28652;Q6PHZ2;Q923T9	>sp|P11798|KCC2A_MOUSE Calcium/calmodulin-dependent protein kinase type II subunit alpha OS=Mus musculus (Mouse) OX=10090 GN=Camk2a PE=1 SV=2;>sp|P28652|KCC2B_MOUSE Calcium/calmodulin-dependent protein kinase type II subunit beta OS=Mus musculus (Mouse) OX=10090 GN=Camk2b PE=1 SV=2;>sp|Q6PHZ2|KCC2D_MOUSE Calcium/calmodulin-dependent protein kinase type II subunit delta OS=Mus musculus (Mouse) OX=…	CAMK2A;CAMK2B;CAMK2D;CAMK2G	2	2	-0.977837	2.56809e-06	1.74231e-05	TRUE	20	16	0.286542
Q3TXX4	Q3TXX4	>sp|Q3TXX4|VGLU1_MOUSE Vesicular glutamate transporter 1 OS=Mus musculus (Mouse) OX=10090 GN=Slc17a7 PE=1 SV=2	SLC17A7	9	6	-0.211116	0.0204205	0.0425053	FALSE	67	61	0.041241
O35295	O35295	>sp|O35295|PURB_MOUSE Transcriptional activator protein Pur-beta OS=Mus musculus (Mouse) OX=10090 GN=Purb PE=1 SV=3	PURB	9	7	-0.14387	0.10705	0.171827	FALSE	77	64	0.220953
P58774	P58774	>sp|P58774|TPM2_MOUSE Tropomyosin beta chain OS=Mus musculus (Mouse) OX=10090 GN=Tpm2 PE=1 SV=1	TPM2	1	1	-0.767182	0.000153107	0.000587056	TRUE	8	8	-0.173148
P16388	P16388	>sp|P16388|KCNA1_MOUSE Potassium voltage-gated channel subfamily A member 1 OS=Mus musculus (Mouse) OX=10090 GN=Kcna1 PE=1 SV=1	KCNA1	7	4	0.337454	0.000458786	0.00152853	TRUE	62	47	0.408778
Q9JKK7	Q9JKK7	>sp|Q9JKK7|TMOD2_MOUSE Tropomodulin-2 OS=Mus musculus (Mouse) OX=10090 GN=Tmod2 PE=1 SV=2	TMOD2	14	11	-0.602678	7.95969e-08	9.36821e-07	TRUE	115	106	0.00888458
P31938;Q63932	P31938;Q63932	>sp|P31938|MP2K1_MOUSE Dual specificity mitogen-activated protein kinase kinase 1 OS=Mus musculus (Mouse) OX=10090 GN=Map2k1 PE=1 SV=2;>sp|Q63932|MP2K2_MOUSE Dual specificity mitogen-activated protein kinase kinase 2 OS=Mus musculus (Mouse) OX=10090 GN=Map2k2 PE=1 SV=2	MAP2K1;MAP2K2	5	4	-0.187017	0.00946381	0.0218962	FALSE	40	37	0.0102301
Q6ZQ18;Q8BG67	Q6ZQ18;Q8BG67	>sp|Q6ZQ18|EFR3B_MOUSE Protein EFR3 homolog B OS=Mus musculus (Mouse) OX=10090 GN=Efr3b PE=1 SV=2;>sp|Q8BG67|EFR3A_MOUSE Protein EFR3 homolog A OS=Mus musculus (Mouse) OX=10090 GN=Efr3a PE=1 SV=1	EFR3B;EFR3A	1	1	-0.180923	0.125068	0.195812	FALSE	10	8	0.266117
O55042	O55042	>sp|O55042|SYUA_MOUSE Alpha-synuclein OS=Mus musculus (Mouse) OX=10090 GN=Snca PE=1 SV=2	SNCA	6	5	-0.408708	0.00519214	0.012789	FALSE	55	44	0.295962
Q80XQ2	Q80XQ2	>sp|Q80XQ2|TBCD5_MOUSE TBC1 domain family member 5 OS=Mus musculus (Mouse) OX=10090 GN=Tbc1d5 PE=1 SV=2	TBC1D5	3	0					3	13	-2.78669
Q8BJH1	Q8BJH1	>sp|Q8BJH1|ZC21A_MOUSE Zinc finger C2HC domain-containing protein 1A OS=Mus musculus (Mouse) OX=10090 GN=Zc2hc1a PE=1 SV=1	ZC2HC1A	12	11	-0.609693	1.2452e-08	2.00045e-07	TRUE	105	95	0.0435541
O55033;Q99M51	O55033;Q99M51	>sp|O55033|NCK2_MOUSE Cytoplasmic protein NCK2 OS=Mus musculus (Mouse) OX=10090 GN=Nck2 PE=1 SV=1;>sp|Q99M51|NCK1_MOUSE Cytoplasmic protein NCK1 OS=Mus musculus (Mouse) OX=10090 GN=Nck1 PE=1 SV=1	NCK2;NCK1	1	1	-0.761163	0.00629882	0.0152197	FALSE	10	8	0.266117
Q8R5H6	Q8R5H6	>sp|Q8R5H6|WASF1_MOUSE Wiskott-Aldrich syndrome protein family member 1 OS=Mus musculus (Mouse) OX=10090 GN=Wasf1 PE=1 SV=2	WASF1	13	6	-0.706542	3.02101e-06	2.00931e-05	TRUE	89	90	-0.186522
P21271	P21271	>sp|P21271|MYO5B_MOUSE Unconventional myosin-Vb OS=Mus musculus (Mouse) OX=10090 GN=Myo5b PE=1 SV=2	MYO5B	1	1	-0.0139559	0.942438	0.957353	FALSE	9	7	0.327532
P34152;Q9QVP9	P34152;Q9QVP9	>sp|P34152|FAK1_MOUSE Focal adhesion kinase 1 OS=Mus musculus (Mouse) OX=10090 GN=Ptk2 PE=1 SV=4;>sp|Q9QVP9|FAK2_MOUSE Protein-tyrosine kinase 2-beta OS=Mus musculus (Mouse) OX=10090 GN=Ptk2b PE=1 SV=2	PTK2;PTK2B	1	1	-0.286656	0.120374	0.189504	FALSE	10	8	0.266117
Q9D289	Q9D289	>sp|Q9D289|TPC6B_MOUSE Trafficking protein particle complex subunit 6B OS=Mus musculus (Mouse) OX=10090 GN=Trappc6b PE=1 SV=1	TRAPPC6B	5	4	-0.249704	0.00923636	0.0214065	FALSE	43	37	0.142545
Q69ZK5	Q69ZK5	>sp|Q69ZK5|KLH14_MOUSE Kelch-like protein 14 OS=Mus musculus (Mouse) OX=10090 GN=Klhl14 PE=1 SV=2	KLHL14	1	0					7	6	0.127896
O70167	O70167	>sp|O70167|P3C2G_MOUSE Phosphatidylinositol 4-phosphate 3-kinase C2 domain-containing subunit gamma OS=Mus musculus (Mouse) OX=10090 GN=Pik3c2g PE=2 SV=1	PIK3C2G	1	0					6	7	-0.437964
Q8BLR2	Q8BLR2	>sp|Q8BLR2|CPNE4_MOUSE Copine-4 OS=Mus musculus (Mouse) OX=10090 GN=Cpne4 PE=1 SV=1	CPNE4	12	8	-0.561349	0.000257299	0.000921306	TRUE	88	83	-0.0406448
O55222	O55222	>sp|O55222|ILK_MOUSE Integrin-linked protein kinase OS=Mus musculus (Mouse) OX=10090 GN=Ilk PE=1 SV=2	ILK	6	3	-0.562372	9.10941e-06	5.16422e-05	TRUE	41	47	-0.448876
P70441	P70441	>sp|P70441|NHRF1_MOUSE Na(+)/H(+) exchange regulatory cofactor NHE-RF1 OS=Mus musculus (Mouse) OX=10090 GN=Slc9a3r1 PE=1 SV=3	SLC9A3R1	11	5	-1.49242	3.57635e-09	7.30941e-08	TRUE	45	67	-0.975867
P63101	P63101	>sp|P63101|1433Z_MOUSE 14-3-3 protein zeta/delta OS=Mus musculus (Mouse) OX=10090 GN=Ywhaz PE=1 SV=1	YWHAZ	10	10	-0.30333	0.000724126	0.00227666	TRUE	99	80	0.285115
Q6ZQ18	Q6ZQ18	>sp|Q6ZQ18|EFR3B_MOUSE Protein EFR3 homolog B OS=Mus musculus (Mouse) OX=10090 GN=Efr3b PE=1 SV=2	EFR3B	22	14	-0.136135	0.0820806	0.137368	FALSE	174	142	0.255987
P0DP26;P0DP27;P0DP28	P0DP26;P0DP27;P0DP28	>sp|P0DP26|CALM1_MOUSE Calmodulin-1 OS=Mus musculus (Mouse) OX=10090 GN=Calm1 PE=1 SV=1;>sp|P0DP27|CALM2_MOUSE Calmodulin-2 OS=Mus musculus (Mouse) OX=10090 GN=Calm2 PE=1 SV=1;>sp|P0DP28|CALM3_MOUSE Calmodulin-3 OS=Mus musculus (Mouse) OX=10090 GN=Calm3 PE=1 SV=1	CALM1;CALM2;CALM3	11	8	-0.834819	0.000480873	0.00159038	TRUE	88	77	0.119557
Q9DBG7	Q9DBG7	>sp|Q9DBG7|SRPRA_MOUSE Signal recognition particle receptor subunit alpha OS=Mus musculus (Mouse) OX=10090 GN=Srpra PE=1 SV=1	SRPRA	6	3	0.0793816	0.517284	0.614431	FALSE	45	36	0.29133
P18653	P18653	>sp|P18653|KS6A1_MOUSE Ribosomal protein S6 kinase alpha-1 OS=Mus musculus (Mouse) OX=10090 GN=Rps6ka1 PE=1 SV=1	RPS6KA1	7	6	0.211866	0.0322724	0.0623119	FALSE	57	48	0.193955
E9Q6P5	E9Q6P5	>sp|E9Q6P5|TTC7B_MOUSE Tetratricopeptide repeat protein 7B OS=Mus musculus (Mouse) OX=10090 GN=Ttc7b PE=1 SV=1	TTC7B	15	11	-0.140214	0.0462976	0.0842255	FALSE	127	101	0.312999
Q6NS52	Q6NS52	>sp|Q6NS52|DGKB_MOUSE Diacylglycerol kinase beta OS=Mus musculus (Mouse) OX=10090 GN=Dgkb PE=1 SV=2	DGKB	10	0					9	39	-3.0546
P31750;Q60823;Q9WUA6	P31750;Q60823;Q9WUA6	>sp|P31750|AKT1_MOUSE RAC-alpha serine/threonine-protein kinase OS=Mus musculus (Mouse) OX=10090 GN=Akt1 PE=1 SV=2;>sp|Q60823|AKT2_MOUSE RAC-beta serine/threonine-protein kinase OS=Mus musculus (Mouse) OX=10090 GN=Akt2 PE=1 SV=1;>sp|Q9WUA6|AKT3_MOUSE RAC-gamma serine/threonine-protein kinase OS=Mus musculus (Mouse) OX=10090 GN=Akt3 PE=1 SV=1	AKT1;AKT2;AKT3	2	1	-0.35183	0.194115	0.283111	FALSE	12	11	-0.0128569
P29595	P29595	>sp|P29595|NEDD8_MOUSE NEDD8 OS=Mus musculus (Mouse) OX=10090 GN=Nedd8 PE=1 SV=2	NEDD8	3	3	-0.0718684	0.617554	0.701372	FALSE	27	22	0.24892
P62309	P62309	>sp|P62309|RUXG_MOUSE Small nuclear ribonucleoprotein G OS=Mus musculus (Mouse) OX=10090 GN=Snrpg PE=1 SV=1	SNRPG	2	0					14	10	0.474446
B1AXV0	B1AXV0	>sp|B1AXV0|FRS1L_MOUSE DOMON domain-containing protein FRRS1L OS=Mus musculus (Mouse) OX=10090 GN=Frrs1l PE=1 SV=1	FRRS1L	7	1	-1.01299	1.24627e-06	9.30664e-06	TRUE	40	54	-0.780608
Q6IRU2	Q6IRU2	>sp|Q6IRU2|TPM4_MOUSE Tropomyosin alpha-4 chain OS=Mus musculus (Mouse) OX=10090 GN=Tpm4 PE=1 SV=3	TPM4	6	2	-0.724826	0.00511472	0.0126155	FALSE	25	33	-0.700764
O54916;Q80XA6	O54916;Q80XA6	>sp|O54916|REPS1_MOUSE RalBP1-associated Eps domain-containing protein 1 OS=Mus musculus (Mouse) OX=10090 GN=Reps1 PE=1 SV=2;>sp|Q80XA6|REPS2_MOUSE RalBP1-associated Eps domain-containing protein 2 OS=Mus musculus (Mouse) OX=10090 GN=Reps2 PE=1 SV=1	REPS1;REPS2	1	1	-0.276494	0.0769448	0.1301	FALSE	10	8	0.266117
Q9QZS3	Q9QZS3	>sp|Q9QZS3|NUMB_MOUSE Protein numb homolog OS=Mus musculus (Mouse) OX=10090 GN=Numb PE=1 SV=1	NUMB	4	1	-0.41115	0.0237636	0.0481242	FALSE	29	24	0.219516
Q07076	Q07076	>sp|Q07076|ANXA7_MOUSE Annexin A7 OS=Mus musculus (Mouse) OX=10090 GN=Anxa7 PE=1 SV=2	ANXA7	8	4	-0.303642	0.000299735	0.00105306	TRUE	57	56	-0.119507
Q68FM6	Q68FM6	>sp|Q68FM6|PPR29_MOUSE Protein phosphatase 1 regulatory subunit 29 OS=Mus musculus (Mouse) OX=10090 GN=Elfn2 PE=1 SV=1	ELFN2	8	0					6	53	-4.4675
P62874;P62880	P62874;P62880	>sp|P62874|GBB1_MOUSE Guanine nucleotide-binding protein G(I)/G(S)/G(T) subunit beta-1 OS=Mus musculus (Mouse) OX=10090 GN=Gnb1 PE=1 SV=3;>sp|P62880|GBB2_MOUSE Guanine nucleotide-binding protein G(I)/G(S)/G(T) subunit beta-2 OS=Mus musculus (Mouse) OX=10090 GN=Gnb2 PE=1 SV=3	GNB1;GNB2	3	2	-1.0736	0.000408377	0.00137926	TRUE	24	20	0.195569
Q9JMG7	Q9JMG7	>sp|Q9JMG7|HDGR3_MOUSE Hepatoma-derived growth factor-related protein 3 OS=Mus musculus (Mouse) OX=10090 GN=Hdgfl3 PE=1 SV=2	HDGFL3	4	2	-0.569783	0.00154838	0.00439661	TRUE	29	24	0.229725
Q3UHH1	Q3UHH1	>sp|Q3UHH1|ZSWM8_MOUSE Zinc finger SWIM domain-containing protein 8 OS=Mus musculus (Mouse) OX=10090 GN=Zswim8 PE=1 SV=1	ZSWIM8	2	1	0.00628611	0.976051	0.982951	FALSE	15	10	0.631323
E9PUL5	E9PUL5	>sp|E9PUL5|PRRT2_MOUSE Proline-rich transmembrane protein 2 OS=Mus musculus (Mouse) OX=10090 GN=Prrt2 PE=1 SV=1	PRRT2	4	1	-0.636251	0.00347319	0.00892826	TRUE	24	24	-0.180696
P48318;P48320	P48318;P48320	>sp|P48318|DCE1_MOUSE Glutamate decarboxylase 1 OS=Mus musculus (Mouse) OX=10090 GN=Gad1 PE=1 SV=2;>sp|P48320|DCE2_MOUSE Glutamate decarboxylase 2 OS=Mus musculus (Mouse) OX=10090 GN=Gad2 PE=1 SV=1	GAD1;GAD2	1	1	-1.57576	1.45259e-09	3.57468e-08	TRUE	10	8	0.266117
Q99J08	Q99J08	>sp|Q99J08|S14L2_MOUSE SEC14-like protein 2 OS=Mus musculus (Mouse) OX=10090 GN=Sec14l2 PE=1 SV=1	SEC14L2	6	1	-1.37001	5.55381e-07	4.76518e-06	TRUE	20	40	-1.52118
Q9DBS2	Q9DBS2	>sp|Q9DBS2|TPRGL_MOUSE Tumor protein p63-regulated gene 1-like protein OS=Mus musculus (Mouse) OX=10090 GN=Tprg1l PE=1 SV=1	TPRG1L	6	3	-0.458719	0.0133432	0.0294496	FALSE	35	43	-0.583376
Q62523	Q62523	>sp|Q62523|ZYX_MOUSE Zyxin OS=Mus musculus (Mouse) OX=10090 GN=Zyx PE=1 SV=2	ZYX	7	5	-0.408276	5.04101e-05	0.000225309	TRUE	54	46	0.168589
Q99JX3	Q99JX3	>sp|Q99JX3|GORS2_MOUSE Golgi reassembly-stacking protein 2 OS=Mus musculus (Mouse) OX=10090 GN=Gorasp2 PE=1 SV=3	GORASP2	5	1	-1.62596	2.34468e-10	8.46273e-09	TRUE	24	36	-0.977433
Q8K3G9	Q8K3G9	>sp|Q8K3G9|DP13B_MOUSE DCC-interacting protein 13-beta OS=Mus musculus (Mouse) OX=10090 GN=Appl2 PE=1 SV=1	APPL2	20	0					47	115	-2.00556
Q9DB75	Q9DB75	>sp|Q9DB75|CDIP1_MOUSE Cell death-inducing p53-target protein 1 OS=Mus musculus (Mouse) OX=10090 GN=Cdip1 PE=2 SV=1	CDIP1	1	1	-0.629054	0.000734269	0.00230321	TRUE	10	8	0.266117
P28661	P28661	>sp|P28661|SEPT4_MOUSE Septin-4 OS=Mus musculus (Mouse) OX=10090 GN=Septin4 PE=1 SV=1	SEPTIN4	5	1	-0.620292	7.74123e-06	4.49689e-05	TRUE	24	24	-0.152752
Q60936	Q60936	>sp|Q60936|COQ8A_MOUSE Atypical kinase COQ8A, mitochondrial OS=Mus musculus (Mouse) OX=10090 GN=Coq8a PE=1 SV=2	COQ8A	6	3	0.583712	0.000358241	0.00122832	TRUE	45	27	0.861413
Q8BPB0;Q921Y0	Q8BPB0;Q921Y0	>sp|Q8BPB0|MOB1B_MOUSE MOB kinase activator 1B OS=Mus musculus (Mouse) OX=10090 GN=Mob1b PE=1 SV=3;>sp|Q921Y0|MOB1A_MOUSE MOB kinase activator 1A OS=Mus musculus (Mouse) OX=10090 GN=Mob1a PE=2 SV=3	MOB1B;MOB1A	3	2	0.0903567	0.402684	0.507465	FALSE	25	20	0.293572
P16045	P16045	>sp|P16045|LEG1_MOUSE Galectin-1 OS=Mus musculus (Mouse) OX=10090 GN=Lgals1 PE=1 SV=3	LGALS1	4	1	-1.63026	0.000479085	0.0015864	TRUE	21	25	-0.465103
P48318	P48318	>sp|P48318|DCE1_MOUSE Glutamate decarboxylase 1 OS=Mus musculus (Mouse) OX=10090 GN=Gad1 PE=1 SV=2	GAD1	10	6	-1.60295	2.25914e-10	8.20872e-09	TRUE	80	77	-0.0716687
Q80ZJ1;Q8BU31	Q80ZJ1;Q8BU31	>sp|Q80ZJ1|RAP2A_MOUSE Ras-related protein Rap-2a OS=Mus musculus (Mouse) OX=10090 GN=Rap2a PE=1 SV=2;>sp|Q8BU31|RAP2C_MOUSE Ras-related protein Rap-2c OS=Mus musculus (Mouse) OX=10090 GN=Rap2c PE=1 SV=1	RAP2A;RAP2C	1	1	0.0568714	0.66736	0.742517	FALSE	10	8	0.266117
P97315	P97315	>sp|P97315|CSRP1_MOUSE Cysteine and glycine-rich protein 1 OS=Mus musculus (Mouse) OX=10090 GN=Csrp1 PE=1 SV=3	CSRP1	3	2	-1.43201	5.15606e-09	9.65371e-08	TRUE	20	22	-0.344112
Q91YD9	Q91YD9	>sp|Q91YD9|WASL_MOUSE Neural Wiskott-Aldrich syndrome protein OS=Mus musculus (Mouse) OX=10090 GN=Wasl PE=1 SV=1	WASL	10	5	-0.713315	2.97837e-07	2.83889e-06	TRUE	70	72	-0.217679
Q99KY4	Q99KY4	>sp|Q99KY4|GAK_MOUSE Cyclin-G-associated kinase OS=Mus musculus (Mouse) OX=10090 GN=Gak PE=1 SV=2	GAK	15	11	0.127086	0.0623904	0.108828	FALSE	125	104	0.230479
Q91ZZ3	Q91ZZ3	>sp|Q91ZZ3|SYUB_MOUSE Beta-synuclein OS=Mus musculus (Mouse) OX=10090 GN=Sncb PE=1 SV=1	SNCB	4	3	-0.0190248	0.899937	0.928049	FALSE	31	27	0.124528
Q8BKX1	Q8BKX1	>sp|Q8BKX1|BAIP2_MOUSE Brain-specific angiogenesis inhibitor 1-associated protein 2 OS=Mus musculus (Mouse) OX=10090 GN=Baiap2 PE=1 SV=2	BAIAP2	24	11	-0.776173	1.01868e-05	5.65077e-05	TRUE	175	169	-0.0887886
Q9JKL5	Q9JKL5	>sp|Q9JKL5|CHP3_MOUSE Calcineurin B homologous protein 3 OS=Mus musculus (Mouse) OX=10090 GN=Tesc PE=1 SV=2	TESC	4	0					19	26	-0.819409
Q8BWH0	Q8BWH0	>sp|Q8BWH0|S38A7_MOUSE Putative sodium-coupled neutral amino acid transporter 7 OS=Mus musculus (Mouse) OX=10090 GN=Slc38a7 PE=1 SV=1	SLC38A7	3	3	0.082135	0.566483	0.657154	FALSE	27	23	0.17086
P35278;P61021;Q9CQD1	P35278;P61021;Q9CQD1	>sp|P35278|RAB5C_MOUSE Ras-related protein Rab-5C OS=Mus musculus (Mouse) OX=10090 GN=Rab5c PE=1 SV=2;>sp|P61021|RAB5B_MOUSE Ras-related protein Rab-5B OS=Mus musculus (Mouse) OX=10090 GN=Rab5b PE=1 SV=1;>sp|Q9CQD1|RAB5A_MOUSE Ras-related protein Rab-5A OS=Mus musculus (Mouse) OX=10090 GN=Rab5a PE=1 SV=1	RAB5C;RAB5B;RAB5A	3	3	-0.00972736	0.865252	0.902423	FALSE	30	24	0.293811
Q8VCC9	Q8VCC9	>sp|Q8VCC9|SPON1_MOUSE Spondin-1 OS=Mus musculus (Mouse) OX=10090 GN=Spon1 PE=1 SV=1	SPON1	12	0					13	71	-3.56909
O70585;Q9D2N4	O70585;Q9D2N4	>sp|O70585|DTNB_MOUSE Dystrobrevin beta OS=Mus musculus (Mouse) OX=10090 GN=Dtnb PE=1 SV=3;>sp|Q9D2N4|DTNA_MOUSE Dystrobrevin alpha OS=Mus musculus (Mouse) OX=10090 GN=Dtna PE=1 SV=2	DTNB;DTNA	1	0					7	8	-0.388938
Q3UVX5	Q3UVX5	>sp|Q3UVX5|GRM5_MOUSE Metabotropic glutamate receptor 5 OS=Mus musculus (Mouse) OX=10090 GN=Grm5 PE=1 SV=2	GRM5	13	7	-0.598358	1.76616e-09	4.19385e-08	TRUE	84	92	-0.336763
Q8BIF2	Q8BIF2	>sp|Q8BIF2|RFOX3_MOUSE RNA binding protein fox-1 homolog 3 OS=Mus musculus (Mouse) OX=10090 GN=Rbfox3 PE=1 SV=2	RBFOX3	2	1	-0.345807	0.169176	0.252597	FALSE	15	16	-0.328964
O88951;Q8JZS0	O88951;Q8JZS0	>sp|O88951|LIN7B_MOUSE Protein lin-7 homolog B OS=Mus musculus (Mouse) OX=10090 GN=Lin7b PE=1 SV=2;>sp|Q8JZS0|LIN7A_MOUSE Protein lin-7 homolog A OS=Mus musculus (Mouse) OX=10090 GN=Lin7a PE=1 SV=2	LIN7B;LIN7A	1	1	-1.3941	2.09313e-05	0.000105909	TRUE	10	8	0.266117
Q8C181	Q8C181	>sp|Q8C181|MBNL2_MOUSE Muscleblind-like protein 2 OS=Mus musculus (Mouse) OX=10090 GN=Mbnl2 PE=2 SV=2	MBNL2	1	1	-0.432933	0.00641521	0.0154639	FALSE	10	7	0.53156
Q01279	Q01279	>sp|Q01279|EGFR_MOUSE Epidermal growth factor receptor OS=Mus musculus (Mouse) OX=10090 GN=Egfr PE=1 SV=1	EGFR	19	2	-1.84452	5.54237e-12	5.08583e-10	TRUE	47	107	-1.84163
O35188	O35188	>sp|O35188|X3CL1_MOUSE Fractalkine OS=Mus musculus (Mouse) OX=10090 GN=Cx3cl1 PE=1 SV=3	CX3CL1	5	2	-0.892251	2.45095e-08	3.56705e-07	TRUE	26	34	-0.702444
P42669	P42669	>sp|P42669|PURA_MOUSE Transcriptional activator protein Pur-alpha OS=Mus musculus (Mouse) OX=10090 GN=Pura PE=1 SV=1	PURA	11	8	0.0425926	0.592449	0.679703	FALSE	96	81	0.192294
P55772	P55772	>sp|P55772|ENTP1_MOUSE Ectonucleoside triphosphate diphosphohydrolase 1 OS=Mus musculus (Mouse) OX=10090 GN=Entpd1 PE=1 SV=1	ENTPD1	1	1	-0.271363	0.0362673	0.0690249	FALSE	10	8	0.266117
Q9CQM5	Q9CQM5	>sp|Q9CQM5|TXD17_MOUSE Thioredoxin domain-containing protein 17 OS=Mus musculus (Mouse) OX=10090 GN=Txndc17 PE=1 SV=1	TXNDC17	2	2	-0.567566	0.000363406	0.00124131	TRUE	20	16	0.286542
Q2M3X8	Q2M3X8	>sp|Q2M3X8|PHAR1_MOUSE Phosphatase and actin regulator 1 OS=Mus musculus (Mouse) OX=10090 GN=Phactr1 PE=1 SV=1	PHACTR1	7	0					12	42	-2.67058
Q91XW9	Q91XW9	>tr|Q91XW9|Q91XW9_MOUSE MCG133388, isoform CRA_f OS=Mus musculus (Mouse) OX=10090 GN=Pcdhgc5 PE=1 SV=1	PCDHGC5	5	1	-0.888306	1.35802e-05	7.24365e-05	TRUE	17	22	-0.66511
P26645	P26645	>sp|P26645|MARCS_MOUSE Myristoylated alanine-rich C-kinase substrate OS=Mus musculus (Mouse) OX=10090 GN=Marcks PE=1 SV=2	MARCKS	11	10	-0.386154	0.00091761	0.00279884	TRUE	106	87	0.250021
Q8R189	Q8R189	>sp|Q8R189|PAQRA_MOUSE Monocyte to macrophage differentiation factor 2 OS=Mus musculus (Mouse) OX=10090 GN=Mmd2 PE=2 SV=1	MMD2	1	1	-0.224728	0.100069	0.162159	FALSE	10	8	0.266117
O55106	O55106	>sp|O55106|STRN_MOUSE Striatin OS=Mus musculus (Mouse) OX=10090 GN=Strn PE=1 SV=2	STRN	21	12	-0.390415	4.62332e-05	0.000208937	TRUE	144	140	-0.0947639
Q91YN5	Q91YN5	>sp|Q91YN5|UAP1_MOUSE UDP-N-acetylhexosamine pyrophosphorylase OS=Mus musculus (Mouse) OX=10090 GN=Uap1 PE=1 SV=1	UAP1	4	2	-0.363313	0.0289186	0.0567882	FALSE	30	27	0.027695
Q8BJ42;Q9D415	Q8BJ42;Q9D415	>sp|Q8BJ42|DLGP2_MOUSE Disks large-associated protein 2 OS=Mus musculus (Mouse) OX=10090 GN=Dlgap2 PE=1 SV=2;>sp|Q9D415|DLGP1_MOUSE Disks large-associated protein 1 OS=Mus musculus (Mouse) OX=10090 GN=Dlgap1 PE=1 SV=3	DLGAP2;DLGAP1	1	0					5	8	-1.02685
Q9ES97	Q9ES97	>sp|Q9ES97|RTN3_MOUSE Reticulon-3 OS=Mus musculus (Mouse) OX=10090 GN=Rtn3 PE=1 SV=2	RTN3	25	11	-1.34336	5.98694e-12	5.31365e-10	TRUE	171	187	-0.342161
Q99JI6	Q99JI6	>sp|Q99JI6|RAP1B_MOUSE Ras-related protein Rap-1b OS=Mus musculus (Mouse) OX=10090 GN=Rap1b PE=1 SV=2	RAP1B	3	1	-0.33194	0.0648177	0.112331	FALSE	18	17	-0.0473044
Q61831;Q9WTU6	Q61831;Q9WTU6	>sp|Q61831|MK10_MOUSE Mitogen-activated protein kinase 10 OS=Mus musculus (Mouse) OX=10090 GN=Mapk10 PE=1 SV=2;>sp|Q9WTU6|MK09_MOUSE Mitogen-activated protein kinase 9 OS=Mus musculus (Mouse) OX=10090 GN=Mapk9 PE=1 SV=2	MAPK10;MAPK9	2	1	-0.551862	0.0210815	0.0436464	FALSE	10	11	-0.32314
Q8BW96	Q8BW96	>sp|Q8BW96|KCC1D_MOUSE Calcium/calmodulin-dependent protein kinase type 1D OS=Mus musculus (Mouse) OX=10090 GN=Camk1d PE=1 SV=2	CAMK1D	5	1	-0.984722	4.45482e-06	2.80773e-05	TRUE	25	36	-0.926374
Q9WV85	Q9WV85	>sp|Q9WV85|NDK3_MOUSE Nucleoside diphosphate kinase 3 OS=Mus musculus (Mouse) OX=10090 GN=Nme3 PE=1 SV=3	NME3	6	6	0.345476	0.000177137	0.000665984	TRUE	58	46	0.320724
P62774	P62774	>sp|P62774|MTPN_MOUSE Myotrophin OS=Mus musculus (Mouse) OX=10090 GN=Mtpn PE=1 SV=2	MTPN	4	3	-0.50986	0.000168718	0.000638321	TRUE	32	30	-0.0390121
Q8VE62	Q8VE62	>sp|Q8VE62|PAIP1_MOUSE Polyadenylate-binding protein-interacting protein 1 OS=Mus musculus (Mouse) OX=10090 GN=Paip1 PE=1 SV=1	PAIP1	5	3	-0.302015	0.000530855	0.00173344	TRUE	37	33	0.0680991
Q68FL4	Q68FL4	>sp|Q68FL4|SAHH3_MOUSE Putative adenosylhomocysteinase 3 OS=Mus musculus (Mouse) OX=10090 GN=Ahcyl2 PE=1 SV=1	AHCYL2	6	6	-0.291478	0.00640041	0.0154351	FALSE	59	46	0.352708
B2RQA1;P16388;P16390;P63141	B2RQA1;P16388;P16390;P63141	>sp|B2RQA1|KCA10_MOUSE Potassium voltage-gated channel subfamily A member 10 OS=Mus musculus (Mouse) OX=10090 GN=Kcna10 PE=2 SV=1;>sp|P16388|KCNA1_MOUSE Potassium voltage-gated channel subfamily A member 1 OS=Mus musculus (Mouse) OX=10090 GN=Kcna1 PE=1 SV=1;>sp|P16390|KCNA3_MOUSE Potassium voltage-gated channel subfamily A member 3 OS=Mus musculus (Mouse) OX=10090 GN=Kcna3 PE=1 SV=3;>sp|P63141|KC…	KCNA10;KCNA1;KCNA3;KCNA2	1	1	-0.108743	0.345736	0.45004	FALSE	10	8	0.266117
Q8R0Y6	Q8R0Y6	>sp|Q8R0Y6|AL1L1_MOUSE Cytosolic 10-formyltetrahydrofolate dehydrogenase OS=Mus musculus (Mouse) OX=10090 GN=Aldh1l1 PE=1 SV=1	ALDH1L1	31	16	-1.71472	8.39521e-12	6.78351e-10	TRUE	190	228	-0.542573
P62748;P84075;Q91X97	P62748;P84075;Q91X97	>sp|P62748|HPCL1_MOUSE Hippocalcin-like protein 1 OS=Mus musculus (Mouse) OX=10090 GN=Hpcal1 PE=1 SV=2;>sp|P84075|HPCA_MOUSE Neuron-specific calcium-binding protein hippocalcin OS=Mus musculus (Mouse) OX=10090 GN=Hpca PE=1 SV=2;>sp|Q91X97|NCALD_MOUSE Neurocalcin-delta OS=Mus musculus (Mouse) OX=10090 GN=Ncald PE=1 SV=4	HPCAL1;HPCA;NCALD	6	2	-0.7712	0.000807262	0.00249744	TRUE	39	39	-0.15743
Q60571	Q60571	>sp|Q60571|CRHBP_MOUSE Corticotropin-releasing factor-binding protein OS=Mus musculus (Mouse) OX=10090 GN=Crhbp PE=2 SV=1	CRHBP	1	0					6	8	-0.661397
Q8BG73	Q8BG73	>sp|Q8BG73|SH3L2_MOUSE SH3 domain-binding glutamic acid-rich-like protein 2 OS=Mus musculus (Mouse) OX=10090 GN=Sh3bgrl2 PE=1 SV=1	SH3BGRL2	2	1	-0.634377	0.000472734	0.00157114	TRUE	11	15	-0.769862
Q8CHH9	Q8CHH9	>sp|Q8CHH9|SEPT8_MOUSE Septin-8 OS=Mus musculus (Mouse) OX=10090 GN=Septin8 PE=1 SV=4	SEPTIN8	11	8	-1.55252	2.89747e-11	1.66882e-09	TRUE	81	85	-0.265756
Q8R4U7	Q8R4U7	>sp|Q8R4U7|LUZP1_MOUSE Leucine zipper protein 1 OS=Mus musculus (Mouse) OX=10090 GN=Luzp1 PE=1 SV=2	LUZP1	6	0					4	18	-2.98083
P35282	P35282	>sp|P35282|RAB21_MOUSE Ras-related protein Rab-21 OS=Mus musculus (Mouse) OX=10090 GN=Rab21 PE=1 SV=4	RAB21	8	7	-0.0940909	0.228744	0.323179	FALSE	72	58	0.28864
Q9Z2Q6	Q9Z2Q6	>sp|Q9Z2Q6|SEPT5_MOUSE Septin-5 OS=Mus musculus (Mouse) OX=10090 GN=Septin5 PE=1 SV=2	SEPTIN5	13	9	-0.40506	3.54211e-05	0.000166467	TRUE	109	95	0.126775
Q8K2H2	Q8K2H2	>sp|Q8K2H2|OTU6B_MOUSE Deubiquitinase OTUD6B OS=Mus musculus (Mouse) OX=10090 GN=Otud6b PE=1 SV=1	OTUD6B	4	2	-0.700103	3.20777e-06	2.12569e-05	TRUE	32	31	-0.0728742
Q3TC93	Q3TC93	>sp|Q3TC93|H1BP3_MOUSE HCLS1-binding protein 3 OS=Mus musculus (Mouse) OX=10090 GN=Hs1bp3 PE=1 SV=2	HS1BP3	5	1	-0.932042	1.61684e-07	1.70303e-06	TRUE	16	31	-1.4685
P61148	P61148	>sp|P61148|FGF1_MOUSE Fibroblast growth factor 1 OS=Mus musculus (Mouse) OX=10090 GN=Fgf1 PE=1 SV=1	FGF1	3	0					4	18	-2.92314
Q4KMM3	Q4KMM3	>sp|Q4KMM3|OXR1_MOUSE Oxidation resistance protein 1 OS=Mus musculus (Mouse) OX=10090 GN=Oxr1 PE=1 SV=3	OXR1	34	21	-1.10017	6.5856e-10	1.92261e-08	TRUE	257	260	-0.185454
G3UZ78	G3UZ78	>sp|G3UZ78|ADGB_MOUSE Androglobin OS=Mus musculus (Mouse) OX=10090 GN=Adgb PE=1 SV=1	ADGB	1	0					7	7	-0.145749
Q8BT14	Q8BT14	>sp|Q8BT14|CNOT4_MOUSE CCR4-NOT transcription complex subunit 4 OS=Mus musculus (Mouse) OX=10090 GN=Cnot4 PE=1 SV=2	CNOT4	2	0					6	10	-1.1005
P17182	P17182	>sp|P17182|ENOA_MOUSE Alpha-enolase OS=Mus musculus (Mouse) OX=10090 GN=Eno1 PE=1 SV=3	ENO1	24	12	-1.06132	2.70122e-12	3.11158e-10	TRUE	178	163	0.0277045
P63328	P63328	>sp|P63328|PP2BA_MOUSE Serine/threonine-protein phosphatase 2B catalytic subunit alpha isoform OS=Mus musculus (Mouse) OX=10090 GN=Ppp3ca PE=1 SV=1	PPP3CA	10	8	-1.14461	1.69711e-08	2.58822e-07	TRUE	85	74	0.122784
Q63844	Q63844	>sp|Q63844|MK03_MOUSE Mitogen-activated protein kinase 3 OS=Mus musculus (Mouse) OX=10090 GN=Mapk3 PE=1 SV=5	MAPK3	13	12	-0.173835	0.0236888	0.0480161	FALSE	126	101	0.299338
Q02956	Q02956	>sp|Q02956|KPCZ_MOUSE Protein kinase C zeta type OS=Mus musculus (Mouse) OX=10090 GN=Prkcz PE=1 SV=2	PRKCZ	1	0					4	6	-0.868187
Q5DTY9	Q5DTY9	>sp|Q5DTY9|KCD16_MOUSE BTB/POZ domain-containing protein KCTD16 OS=Mus musculus (Mouse) OX=10090 GN=Kctd16 PE=1 SV=2	KCTD16	11	6	-0.13425	0.151998	0.231656	FALSE	81	67	0.236833
P63318	P63318	>sp|P63318|KPCG_MOUSE Protein kinase C gamma type OS=Mus musculus (Mouse) OX=10090 GN=Prkcg PE=1 SV=1	PRKCG	18	8	-0.32389	0.00614192	0.0149181	FALSE	126	110	0.11874
O35678	O35678	>sp|O35678|MGLL_MOUSE Monoglyceride lipase OS=Mus musculus (Mouse) OX=10090 GN=Mgll PE=1 SV=1	MGLL	10	1	-2.17584	9.85829e-11	4.19577e-09	TRUE	25	59	-1.87042
Q8VCI5	Q8VCI5	>sp|Q8VCI5|PEX19_MOUSE Peroxisomal biogenesis factor 19 OS=Mus musculus (Mouse) OX=10090 GN=Pex19 PE=1 SV=1	PEX19	3	1	-0.295679	0.109277	0.175089	FALSE	19	24	-0.605936
Q61548	Q61548	>sp|Q61548|AP180_MOUSE Clathrin coat assembly protein AP180 OS=Mus musculus (Mouse) OX=10090 GN=Snap91 PE=1 SV=1	SNAP91	20	12	-0.928018	4.71229e-11	2.42975e-09	TRUE	157	136	0.13699
P43276	P43276	>sp|P43276|H15_MOUSE Histone H1.5 OS=Mus musculus (Mouse) OX=10090 GN=H1-5 PE=1 SV=2	H1-5	5	2	0.259802	0.226334	0.321373	FALSE	30	26	0.148559
Q8R2R6	Q8R2R6	>sp|Q8R2R6|MTG1_MOUSE Mitochondrial ribosome-associated GTPase 1 OS=Mus musculus (Mouse) OX=10090 GN=Mtg1 PE=1 SV=2	MTG1	1	1	-0.169002	0.190882	0.279609	FALSE	9	8	0.0540382
Q01730	Q01730	>sp|Q01730|RSU1_MOUSE Ras suppressor protein 1 OS=Mus musculus (Mouse) OX=10090 GN=Rsu1 PE=1 SV=3	RSU1	6	3	-1.28081	1.31945e-10	5.21424e-09	TRUE	31	45	-0.917091
Q91XV3	Q91XV3	>sp|Q91XV3|BASP1_MOUSE Brain acid soluble protein 1 OS=Mus musculus (Mouse) OX=10090 GN=Basp1 PE=1 SV=3	BASP1	11	8	-0.100062	0.228719	0.323179	FALSE	89	80	0.0637654
P70211	P70211	>sp|P70211|DCC_MOUSE Netrin receptor DCC OS=Mus musculus (Mouse) OX=10090 GN=Dcc PE=1 SV=2	DCC	21	10	-0.649923	8.51094e-06	4.876e-05	TRUE	125	140	-0.38837
P63250	P63250	>sp|P63250|KCNJ3_MOUSE G protein-activated inward rectifier potassium channel 1 OS=Mus musculus (Mouse) OX=10090 GN=Kcnj3 PE=1 SV=1	KCNJ3	5	1	0.102253	0.309644	0.411895	FALSE	30	24	0.310201
P68404	P68404	>sp|P68404|KPCB_MOUSE Protein kinase C beta type OS=Mus musculus (Mouse) OX=10090 GN=Prkcb PE=1 SV=4	PRKCB	11	5	-0.408599	0.0106921	0.0242713	FALSE	76	63	0.208979
Q9WUD6	Q9WUD6	>sp|Q9WUD6|WNT8B_MOUSE Protein Wnt-8b OS=Mus musculus (Mouse) OX=10090 GN=Wnt8b PE=2 SV=1	WNT8B	5	3	-0.541348	0.000194346	0.000721171	TRUE	28	28	-0.119794
Q91VU0	Q91VU0	>sp|Q91VU0|FAM3C_MOUSE Protein FAM3C OS=Mus musculus (Mouse) OX=10090 GN=Fam3c PE=1 SV=1	FAM3C	5	5	-0.403338	1.70835e-05	8.90183e-05	TRUE	47	39	0.222539
Q9D2N4	Q9D2N4	>sp|Q9D2N4|DTNA_MOUSE Dystrobrevin alpha OS=Mus musculus (Mouse) OX=10090 GN=Dtna PE=1 SV=2	DTNA	11	4	-1.17812	1.33456e-07	1.45087e-06	TRUE	65	74	-0.41942
Q80WG5	Q80WG5	>sp|Q80WG5|LRC8A_MOUSE Volume-regulated anion channel subunit LRRC8A OS=Mus musculus (Mouse) OX=10090 GN=Lrrc8a PE=1 SV=1	LRRC8A	14	5	-0.263787	0.00394152	0.00997633	TRUE	78	87	-0.393092
P23818	P23818	>sp|P23818|GRIA1_MOUSE Glutamate receptor 1 OS=Mus musculus (Mouse) OX=10090 GN=Gria1 PE=1 SV=1	GRIA1	19	5	-1.79609	1.16241e-14	7.86663e-12	TRUE	91	126	-0.824306
Q80TZ3;Q99KY4	Q80TZ3;Q99KY4	>sp|Q80TZ3|AUXI_MOUSE Putative tyrosine-protein phosphatase auxilin OS=Mus musculus (Mouse) OX=10090 GN=Dnajc6 PE=1 SV=2;>sp|Q99KY4|GAK_MOUSE Cyclin-G-associated kinase OS=Mus musculus (Mouse) OX=10090 GN=Gak PE=1 SV=2	DNAJC6;GAK	2	2	-0.970447	7.09925e-09	1.26263e-07	TRUE	20	16	0.286542
Q9ER00	Q9ER00	>sp|Q9ER00|STX12_MOUSE Syntaxin-12 OS=Mus musculus (Mouse) OX=10090 GN=Stx12 PE=1 SV=1	STX12	7	7	-0.462409	5.74151e-07	4.8952e-06	TRUE	70	56	0.302425
Q9CZL5	Q9CZL5	>sp|Q9CZL5|PHS2_MOUSE Pterin-4-alpha-carbinolamine dehydratase 2 OS=Mus musculus (Mouse) OX=10090 GN=Pcbd2 PE=1 SV=2	PCBD2	2	0					13	10	0.346079
Q60780	Q60780	>sp|Q60780|GAS7_MOUSE Growth arrest-specific protein 7 OS=Mus musculus (Mouse) OX=10090 GN=Gas7 PE=1 SV=1	GAS7	11	2	-1.56672	1.57219e-11	1.07745e-09	TRUE	42	80	-1.46415
P17156	P17156	>sp|P17156|HSP72_MOUSE Heat shock-related 70 kDa protein 2 OS=Mus musculus (Mouse) OX=10090 GN=Hspa2 PE=1 SV=2	HSPA2	15	12	-0.157661	0.0293366	0.0575256	FALSE	125	104	0.218004
Q6PEE3	Q6PEE3	>sp|Q6PEE3|RIR2B_MOUSE Ribonucleoside-diphosphate reductase subunit M2 B OS=Mus musculus (Mouse) OX=10090 GN=Rrm2b PE=1 SV=1	RRM2B	1	1	-0.261813	0.0899884	0.147949	FALSE	8	7	0.0293859
Q80TE7	Q80TE7	>sp|Q80TE7|LRRC7_MOUSE Leucine-rich repeat-containing protein 7 OS=Mus musculus (Mouse) OX=10090 GN=Lrrc7 PE=1 SV=2	LRRC7	19	2	-0.951448	3.42384e-06	2.23873e-05	TRUE	58	112	-1.51319
Q5PR73	Q5PR73	>sp|Q5PR73|DIRA2_MOUSE GTP-binding protein Di-Ras2 OS=Mus musculus (Mouse) OX=10090 GN=Diras2 PE=1 SV=1	DIRAS2	5	5	-1.20482	1.44363e-12	2.00406e-10	TRUE	45	40	0.0732014
Q9Z0J0	Q9Z0J0	>sp|Q9Z0J0|NPC2_MOUSE NPC intracellular cholesterol transporter 2 OS=Mus musculus (Mouse) OX=10090 GN=Npc2 PE=1 SV=1	NPC2	1	1	-0.960477	4.50966e-07	4.02892e-06	TRUE	10	8	0.266117
Q8R0A7	Q8R0A7	>sp|Q8R0A7|K0513_MOUSE Uncharacterized protein KIAA0513 OS=Mus musculus (Mouse) OX=10090 GN=Kiaa0513 PE=1 SV=1	KIAA0513	9	7	-0.711723	5.10107e-10	1.57416e-08	TRUE	75	68	0.049262
Q80WC7	Q80WC7	>sp|Q80WC7|AGFG2_MOUSE Arf-GAP domain and FG repeat-containing protein 2 OS=Mus musculus (Mouse) OX=10090 GN=Agfg2 PE=1 SV=1	AGFG2	5	5	-0.0632411	0.525915	0.621954	FALSE	50	40	0.299806
Q6PH08;Q99MI1	Q6PH08;Q99MI1	>sp|Q6PH08|ERC2_MOUSE ERC protein 2 OS=Mus musculus (Mouse) OX=10090 GN=Erc2 PE=1 SV=2;>sp|Q99MI1|RB6I2_MOUSE ELKS/Rab6-interacting/CAST family member 1 OS=Mus musculus (Mouse) OX=10090 GN=Erc1 PE=1 SV=1	ERC2;ERC1	9	5	-0.765518	2.31557e-09	5.20186e-08	TRUE	69	60	0.129291
P46460	P46460	>sp|P46460|NSF_MOUSE Vesicle-fusing ATPase OS=Mus musculus (Mouse) OX=10090 GN=Nsf PE=1 SV=2	NSF	37	32	-0.691218	1.2588e-09	3.18464e-08	TRUE	344	279	0.278322
Q3TDK6	Q3TDK6	>sp|Q3TDK6|ROGDI_MOUSE Protein rogdi homolog OS=Mus musculus (Mouse) OX=10090 GN=Rogdi PE=1 SV=2	ROGDI	11	8	0.0274739	0.686242	0.758073	FALSE	94	75	0.30621
Q8BWG8	Q8BWG8	>sp|Q8BWG8|ARRB1_MOUSE Beta-arrestin-1 OS=Mus musculus (Mouse) OX=10090 GN=Arrb1 PE=1 SV=1	ARRB1	9	6	0.132569	0.16284	0.245165	FALSE	71	61	0.141414
O88485	O88485	>sp|O88485|DC1I1_MOUSE Cytoplasmic dynein 1 intermediate chain 1 OS=Mus musculus (Mouse) OX=10090 GN=Dync1i1 PE=1 SV=2	DYNC1I1	16	9	-0.0935511	0.204614	0.295802	FALSE	122	105	0.144517
Q8R0P4	Q8R0P4	>sp|Q8R0P4|AAMDC_MOUSE Mth938 domain-containing protein OS=Mus musculus (Mouse) OX=10090 GN=Aamdc PE=1 SV=1	AAMDC	6	6	-0.835332	2.06301e-07	2.07605e-06	TRUE	56	48	0.166902
Q8C0L9	Q8C0L9	>sp|Q8C0L9|GPCP1_MOUSE Glycerophosphocholine phosphodiesterase GPCPD1 OS=Mus musculus (Mouse) OX=10090 GN=Gpcpd1 PE=1 SV=1	GPCPD1	11	1	-1.41293	7.34974e-07	6.00173e-06	TRUE	37	65	-1.30472
O70161	O70161	>sp|O70161|PI51C_MOUSE Phosphatidylinositol 4-phosphate 5-kinase type-1 gamma OS=Mus musculus (Mouse) OX=10090 GN=Pip5k1c PE=1 SV=2	PIP5K1C	10	7	-0.890102	1.11677e-08	1.81567e-07	TRUE	82	75	0.023318
B2RW11	B2RW11	>tr|B2RW11|B2RW11_MOUSE ANK_REP_REGION domain-containing protein OS=Mus musculus (Mouse) OX=10090 GN=Ankrd34a PE=1 SV=1	ANKRD34A	3	0					8	20	-1.97098
Q9JKB3	Q9JKB3	>sp|Q9JKB3|YBOX3_MOUSE Y-box-binding protein 3 OS=Mus musculus (Mouse) OX=10090 GN=Ybx3 PE=1 SV=2	YBX3	2	1	-0.913705	8.23559e-05	0.000341338	TRUE	12	11	0.0493975
P48453;P63328	P48453;P63328	>sp|P48453|PP2BB_MOUSE Serine/threonine-protein phosphatase 2B catalytic subunit beta isoform OS=Mus musculus (Mouse) OX=10090 GN=Ppp3cb PE=1 SV=2;>sp|P63328|PP2BA_MOUSE Serine/threonine-protein phosphatase 2B catalytic subunit alpha isoform OS=Mus musculus (Mouse) OX=10090 GN=Ppp3ca PE=1 SV=1	PPP3CB;PPP3CA	5	3	-1.04438	1.82122e-09	4.287e-08	TRUE	33	27	0.251663
Q8BNY6	Q8BNY6	>sp|Q8BNY6|NCS1_MOUSE Neuronal calcium sensor 1 OS=Mus musculus (Mouse) OX=10090 GN=Ncs1 PE=1 SV=3	NCS1	7	3	-1.47753	9.61304e-11	4.13056e-09	TRUE	42	50	-0.504862
P54830	P54830	>sp|P54830|PTN5_MOUSE Tyrosine-protein phosphatase non-receptor type 5 OS=Mus musculus (Mouse) OX=10090 GN=Ptpn5 PE=1 SV=2	PTPN5	4	1	-1.56297	6.46461e-08	7.90872e-07	TRUE	19	28	-0.945611
P48453;P48455;P63328	P48453;P48455;P63328	>sp|P48453|PP2BB_MOUSE Serine/threonine-protein phosphatase 2B catalytic subunit beta isoform OS=Mus musculus (Mouse) OX=10090 GN=Ppp3cb PE=1 SV=2;>sp|P48455|PP2BC_MOUSE Serine/threonine-protein phosphatase 2B catalytic subunit gamma isoform OS=Mus musculus (Mouse) OX=10090 GN=Ppp3cc PE=1 SV=1;>sp|P63328|PP2BA_MOUSE Serine/threonine-protein phosphatase 2B catalytic subunit alpha isoform OS=Mus mu…	PPP3CB;PPP3CC;PPP3CA	3	3	-0.906953	5.66007e-07	4.83338e-06	TRUE	30	24	0.293811
Q99JW4	Q99JW4	>sp|Q99JW4|LIMS1_MOUSE LIM and senescent cell antigen-like-containing domain protein 1 OS=Mus musculus (Mouse) OX=10090 GN=Lims1 PE=1 SV=3	LIMS1	1	1	-0.554606	0.000104034	0.00042127	TRUE	9	8	0.0540382
Q91WT9	Q91WT9	>sp|Q91WT9|CBS_MOUSE Cystathionine beta-synthase OS=Mus musculus (Mouse) OX=10090 GN=Cbs PE=1 SV=3	CBS	8	0					28	48	-1.27399
Q6PD03	Q6PD03	>sp|Q6PD03|2A5A_MOUSE Serine/threonine-protein phosphatase 2A 56 kDa regulatory subunit alpha isoform OS=Mus musculus (Mouse) OX=10090 GN=Ppp2r5a PE=1 SV=1	PPP2R5A	10	8	-0.26883	1.93602e-05	9.94462e-05	TRUE	87	74	0.179576
P61982;P68510	P61982;P68510	>sp|P61982|1433G_MOUSE 14-3-3 protein gamma OS=Mus musculus (Mouse) OX=10090 GN=Ywhag PE=1 SV=2;>sp|P68510|1433F_MOUSE 14-3-3 protein eta OS=Mus musculus (Mouse) OX=10090 GN=Ywhah PE=1 SV=2	YWHAG;YWHAH	2	0					7	15	-1.60709
P15508;Q62261	P15508;Q62261	>sp|P15508|SPTB1_MOUSE Spectrin beta chain, erythrocytic OS=Mus musculus (Mouse) OX=10090 GN=Sptb PE=1 SV=4;>sp|Q62261|SPTB2_MOUSE Spectrin beta chain, non-erythrocytic 1 OS=Mus musculus (Mouse) OX=10090 GN=Sptbn1 PE=1 SV=2	SPTB;SPTBN1	2	2	-0.403764	0.199931	0.289961	FALSE	19	14	0.438559
P46414	P46414	>sp|P46414|CDN1B_MOUSE Cyclin-dependent kinase inhibitor 1B OS=Mus musculus (Mouse) OX=10090 GN=Cdkn1b PE=1 SV=2	CDKN1B	3	3	-0.287808	0.0302738	0.0590425	FALSE	28	22	0.326042
Q9CR98	Q9CR98	>sp|Q9CR98|F136A_MOUSE Protein FAM136A OS=Mus musculus (Mouse) OX=10090 GN=Fam136a PE=1 SV=1	FAM136A	2	2	-0.18698	0.0388941	0.0729888	FALSE	20	16	0.286542
A2RSJ4	A2RSJ4	>sp|A2RSJ4|UH1BL_MOUSE UHRF1-binding protein 1-like OS=Mus musculus (Mouse) OX=10090 GN=Uhrf1bp1l PE=1 SV=2	UHRF1BP1L	5	3	0.22372	0.076868	0.130051	FALSE	39	30	0.384455
P48453	P48453	>sp|P48453|PP2BB_MOUSE Serine/threonine-protein phosphatase 2B catalytic subunit beta isoform OS=Mus musculus (Mouse) OX=10090 GN=Ppp3cb PE=1 SV=2	PPP3CB	10	8	-0.901274	6.32959e-09	1.14995e-07	TRUE	91	79	0.135165
Q61644	Q61644	>sp|Q61644|PACN1_MOUSE Protein kinase C and casein kinase substrate in neurons protein 1 OS=Mus musculus (Mouse) OX=10090 GN=Pacsin1 PE=1 SV=1	PACSIN1	15	12	-1.14381	4.73327e-12	4.74554e-10	TRUE	134	118	0.0995184
Q91XW9;Q91XX1;Q91XX5;Q91XX6;Q91XX9;Q91XY5;Q91XY7;Q91XY8	Q91XW9;Q91XX1;Q91XX5;Q91XX6;Q91XX9;Q91XY5;Q91XY7;Q91XY8	>tr|Q91XW9|Q91XW9_MOUSE MCG133388, isoform CRA_f OS=Mus musculus (Mouse) OX=10090 GN=Pcdhgc5 PE=1 SV=1;>tr|Q91XX1|Q91XX1_MOUSE Protocadherin gamma C3 OS=Mus musculus (Mouse) OX=10090 GN=Pcdhgc3 PE=1 SV=1;>tr|Q91XX5|Q91XX5_MOUSE Protocadherin gamma B5 OS=Mus musculus (Mouse) OX=10090 GN=Pcdhgb5 PE=2 SV=1;>tr|Q91XX6|Q91XX6_MOUSE Protocadherin gamma B4 OS=Mus musculus (Mouse) OX=10090 GN=Pcdhgb4 PE=…	PCDHGC5;PCDHGC3;PCDHGB5;PCDHGB4;PCDHGA9;PCDHGA3;PCDHGA12;PCDHGA11	2	2	-0.613821	6.94858e-06	4.13402e-05	TRUE	20	16	0.286542
Q9JKV5	Q9JKV5	>sp|Q9JKV5|SCAM4_MOUSE Secretory carrier-associated membrane protein 4 OS=Mus musculus (Mouse) OX=10090 GN=Scamp4 PE=1 SV=1	SCAMP4	1	0					7	7	-0.20098
P06801	P06801	>sp|P06801|MAOX_MOUSE NADP-dependent malic enzyme OS=Mus musculus (Mouse) OX=10090 GN=Me1 PE=1 SV=2	ME1	21	14	-1.13423	5.6503e-10	1.6901e-08	TRUE	153	149	-0.103016
Q9D415	Q9D415	>sp|Q9D415|DLGP1_MOUSE Disks large-associated protein 1 OS=Mus musculus (Mouse) OX=10090 GN=Dlgap1 PE=1 SV=3	DLGAP1	10	4	-0.983656	1.06693e-09	2.7638e-08	TRUE	57	72	-0.634711
Q3TZX3	Q3TZX3	>sp|Q3TZX3|S2533_MOUSE Solute carrier family 25 member 33 OS=Mus musculus (Mouse) OX=10090 GN=Slc25a33 PE=2 SV=1	SLC25A33	1	1	-0.563243	0.000330362	0.00114947	TRUE	10	8	0.266117
P48722	P48722	>sp|P48722|HS74L_MOUSE Heat shock 70 kDa protein 4L OS=Mus musculus (Mouse) OX=10090 GN=Hspa4l PE=1 SV=2	HSPA4L	30	15	-0.75607	1.73713e-11	1.15249e-09	TRUE	198	217	-0.355866
O08734	O08734	>sp|O08734|BAK_MOUSE Bcl-2 homologous antagonist/killer OS=Mus musculus (Mouse) OX=10090 GN=Bak1 PE=1 SV=3	BAK1	4	2	-0.671564	0.000187763	0.00069866	TRUE	23	28	-0.573338
Q9WUA3	Q9WUA3	>sp|Q9WUA3|PFKAP_MOUSE ATP-dependent 6-phosphofructokinase, platelet type OS=Mus musculus (Mouse) OX=10090 GN=Pfkp PE=1 SV=1	PFKP	24	18	-0.664914	9.02051e-09	1.5406e-07	TRUE	195	180	0.0100293
P43274;P43277	P43274;P43277	>sp|P43274|H14_MOUSE Histone H1.4 OS=Mus musculus (Mouse) OX=10090 GN=H1-4 PE=1 SV=2;>sp|P43277|H13_MOUSE Histone H1.3 OS=Mus musculus (Mouse) OX=10090 GN=H1-3 PE=1 SV=2	H1-4;H1-3	3	3	0.114661	0.432375	0.536407	FALSE	30	24	0.293811
P56391	P56391	>sp|P56391|CX6B1_MOUSE Cytochrome c oxidase subunit 6B1 OS=Mus musculus (Mouse) OX=10090 GN=Cox6b1 PE=1 SV=2	COX6B1	2	1	-1.12156	9.91572e-06	5.52262e-05	TRUE	13	16	-0.580196
Q80U40	Q80U40	>sp|Q80U40|RIMB2_MOUSE RIMS-binding protein 2 OS=Mus musculus (Mouse) OX=10090 GN=Rimbp2 PE=1 SV=3	RIMBP2	9	0					21	62	-2.34683
P22682	P22682	>sp|P22682|CBL_MOUSE E3 ubiquitin-protein ligase CBL OS=Mus musculus (Mouse) OX=10090 GN=Cbl PE=1 SV=3	CBL	5	0					18	19	-0.275404
Q9EQJ0	Q9EQJ0	>sp|Q9EQJ0|TPC1_MOUSE Two pore calcium channel protein 1 OS=Mus musculus (Mouse) OX=10090 GN=Tpcn1 PE=1 SV=1	TPCN1	4	0					8	23	-2.19483
Q91ZF0	Q91ZF0	>sp|Q91ZF0|DJC24_MOUSE DnaJ homolog subfamily C member 24 OS=Mus musculus (Mouse) OX=10090 GN=Dnajc24 PE=1 SV=4	DNAJC24	2	0					13	11	0.144316
Q9WUK2	Q9WUK2	>sp|Q9WUK2|IF4H_MOUSE Eukaryotic translation initiation factor 4H OS=Mus musculus (Mouse) OX=10090 GN=Eif4h PE=1 SV=3	EIF4H	9	7	-0.779174	2.03111e-08	3.03768e-07	TRUE	67	69	-0.209556
Q62108;Q811D0;Q91XM9	Q62108;Q811D0;Q91XM9	>sp|Q62108|DLG4_MOUSE Disks large homolog 4 OS=Mus musculus (Mouse) OX=10090 GN=Dlg4 PE=1 SV=1;>sp|Q811D0|DLG1_MOUSE Disks large homolog 1 OS=Mus musculus (Mouse) OX=10090 GN=Dlg1 PE=1 SV=1;>sp|Q91XM9|DLG2_MOUSE Disks large homolog 2 OS=Mus musculus (Mouse) OX=10090 GN=Dlg2 PE=1 SV=2	DLG4;DLG1;DLG2	1	1	-0.95016	1.83915e-05	9.51926e-05	TRUE	10	8	0.266117
Q8CBW3	Q8CBW3	>sp|Q8CBW3|ABI1_MOUSE Abl interactor 1 OS=Mus musculus (Mouse) OX=10090 GN=Abi1 PE=1 SV=3	ABI1	7	6	-0.594659	4.38673e-09	8.63628e-08	TRUE	59	49	0.222565
P68510	P68510	>sp|P68510|1433F_MOUSE 14-3-3 protein eta OS=Mus musculus (Mouse) OX=10090 GN=Ywhah PE=1 SV=2	YWHAH	13	9	-0.0955492	0.32866	0.431265	FALSE	114	99	0.13736
O08759	O08759	>sp|O08759|UBE3A_MOUSE Ubiquitin-protein ligase E3A OS=Mus musculus (Mouse) OX=10090 GN=Ube3a PE=1 SV=2	UBE3A	21	15	-0.280556	8.4624e-06	4.85333e-05	TRUE	167	152	0.0320905
Q99MI1	Q99MI1	>sp|Q99MI1|RB6I2_MOUSE ELKS/Rab6-interacting/CAST family member 1 OS=Mus musculus (Mouse) OX=10090 GN=Erc1 PE=1 SV=1	ERC1	25	8	-0.811116	2.83326e-10	9.83285e-09	TRUE	127	156	-0.592387
Q8BZ98	Q8BZ98	>sp|Q8BZ98|DYN3_MOUSE Dynamin-3 OS=Mus musculus (Mouse) OX=10090 GN=Dnm3 PE=1 SV=1	DNM3	19	15	-0.20598	0.00421447	0.0105978	FALSE	164	133	0.27355
O35526	O35526	>sp|O35526|STX1A_MOUSE Syntaxin-1A OS=Mus musculus (Mouse) OX=10090 GN=Stx1a PE=1 SV=3	STX1A	21	13	0.350317	1.58929e-05	8.35381e-05	TRUE	174	132	0.407036
Q3B7Z2	Q3B7Z2	>sp|Q3B7Z2|OSBP1_MOUSE Oxysterol-binding protein 1 OS=Mus musculus (Mouse) OX=10090 GN=Osbp PE=1 SV=3	OSBP	15	10	0.13705	0.029136	0.0571737	FALSE	127	111	0.109062
P61079;P62838	P61079;P62838	>sp|P61079|UB2D3_MOUSE Ubiquitin-conjugating enzyme E2 D3 OS=Mus musculus (Mouse) OX=10090 GN=Ube2d3 PE=1 SV=1;>sp|P62838|UB2D2_MOUSE Ubiquitin-conjugating enzyme E2 D2 OS=Mus musculus (Mouse) OX=10090 GN=Ube2d2 PE=1 SV=1	UBE2D3;UBE2D2	1	1	-0.188389	0.275728	0.376208	FALSE	10	8	0.266117
O55033	O55033	>sp|O55033|NCK2_MOUSE Cytoplasmic protein NCK2 OS=Mus musculus (Mouse) OX=10090 GN=Nck2 PE=1 SV=1	NCK2	11	6	-0.400787	3.40896e-06	2.23169e-05	TRUE	79	70	0.0885888
Q9R0E2	Q9R0E2	>sp|Q9R0E2|PLOD1_MOUSE Procollagen-lysine,2-oxoglutarate 5-dioxygenase 1 OS=Mus musculus (Mouse) OX=10090 GN=Plod1 PE=1 SV=1	PLOD1	8	2	-0.128179	0.387225	0.492237	FALSE	35	49	-0.850454
Q9QYB5	Q9QYB5	>sp|Q9QYB5|ADDG_MOUSE Gamma-adducin OS=Mus musculus (Mouse) OX=10090 GN=Add3 PE=1 SV=2	ADD3	14	9	-0.847336	2.90557e-09	6.26723e-08	TRUE	95	98	-0.227201
Q9EQP2;Q9QXY6	Q9EQP2;Q9QXY6	>sp|Q9EQP2|EHD4_MOUSE EH domain-containing protein 4 OS=Mus musculus (Mouse) OX=10090 GN=Ehd4 PE=1 SV=1;>sp|Q9QXY6|EHD3_MOUSE EH domain-containing protein 3 OS=Mus musculus (Mouse) OX=10090 GN=Ehd3 PE=1 SV=2	EHD4;EHD3	1	1	-0.278575	0.0318246	0.0615792	FALSE	10	8	0.266117
B2RQA1;P16388;P16390;P63141;Q61423;Q61762;Q61923	B2RQA1;P16388;P16390;P63141;Q61423;Q61762;Q61923	>sp|B2RQA1|KCA10_MOUSE Potassium voltage-gated channel subfamily A member 10 OS=Mus musculus (Mouse) OX=10090 GN=Kcna10 PE=2 SV=1;>sp|P16388|KCNA1_MOUSE Potassium voltage-gated channel subfamily A member 1 OS=Mus musculus (Mouse) OX=10090 GN=Kcna1 PE=1 SV=1;>sp|P16390|KCNA3_MOUSE Potassium voltage-gated channel subfamily A member 3 OS=Mus musculus (Mouse) OX=10090 GN=Kcna3 PE=1 SV=3;>sp|P63141|KC…	KCNA10;KCNA1;KCNA3;KCNA2;KCNA4;KCNA5;KCNA6	1	1	-0.285191	0.0592074	0.103939	FALSE	10	8	0.266117
Q3UVK0	Q3UVK0	>sp|Q3UVK0|ERMP1_MOUSE Endoplasmic reticulum metallopeptidase 1 OS=Mus musculus (Mouse) OX=10090 GN=Ermp1 PE=1 SV=2	ERMP1	14	12	0.370375	3.43201e-06	2.24136e-05	TRUE	127	100	0.328198
Q9D924	Q9D924	>sp|Q9D924|ISCA1_MOUSE Iron-sulfur cluster assembly 1 homolog, mitochondrial OS=Mus musculus (Mouse) OX=10090 GN=Isca1 PE=2 SV=1	ISCA1	5	0					24	38	-1.08624
Q9R118	Q9R118	>sp|Q9R118|HTRA1_MOUSE Serine protease HTRA1 OS=Mus musculus (Mouse) OX=10090 GN=Htra1 PE=1 SV=2	HTRA1	15	5	-1.36434	2.00498e-06	1.40064e-05	TRUE	79	88	-0.386515
Q2M3X8;Q501J7	Q2M3X8;Q501J7	>sp|Q2M3X8|PHAR1_MOUSE Phosphatase and actin regulator 1 OS=Mus musculus (Mouse) OX=10090 GN=Phactr1 PE=1 SV=1;>sp|Q501J7|PHAR4_MOUSE Phosphatase and actin regulator 4 OS=Mus musculus (Mouse) OX=10090 GN=Phactr4 PE=1 SV=2	PHACTR1;PHACTR4	1	0					7	8	-0.402733
O55131	O55131	>sp|O55131|SEPT7_MOUSE Septin-7 OS=Mus musculus (Mouse) OX=10090 GN=Septin7 PE=1 SV=1	SEPTIN7	18	13	-0.479291	1.13426e-06	8.64301e-06	TRUE	146	133	0.0368993
Q91YR9	Q91YR9	>sp|Q91YR9|PTGR1_MOUSE Prostaglandin reductase 1 OS=Mus musculus (Mouse) OX=10090 GN=Ptgr1 PE=1 SV=2	PTGR1	1	0					5	7	-0.712052
P51859;Q3UMU9;Q99JF8;Q9JMG7	P51859;Q3UMU9;Q99JF8;Q9JMG7	>sp|P51859|HDGF_MOUSE Hepatoma-derived growth factor OS=Mus musculus (Mouse) OX=10090 GN=Hdgf PE=1 SV=2;>sp|Q3UMU9|HDGR2_MOUSE Hepatoma-derived growth factor-related protein 2 OS=Mus musculus (Mouse) OX=10090 GN=Hdgfl2 PE=1 SV=1;>sp|Q99JF8|PSIP1_MOUSE PC4 and SFRS1-interacting protein OS=Mus musculus (Mouse) OX=10090 GN=Psip1 PE=1 SV=1;>sp|Q9JMG7|HDGR3_MOUSE Hepatoma-derived growth factor-related…	HDGF;HDGFL2;PSIP1;HDGFL3	1	1	-0.437015	0.00265435	0.00706521	TRUE	10	8	0.266117
Q6P8X1	Q6P8X1	>sp|Q6P8X1|SNX6_MOUSE Sorting nexin-6 OS=Mus musculus (Mouse) OX=10090 GN=Snx6 PE=1 SV=2	SNX6	11	6	-0.361349	6.10855e-05	0.000264574	TRUE	78	72	0.00267587
P97797	P97797	>sp|P97797|SHPS1_MOUSE Tyrosine-protein phosphatase non-receptor type substrate 1 OS=Mus musculus (Mouse) OX=10090 GN=Sirpa PE=1 SV=2	SIRPA	10	7	-0.880297	5.40793e-08	6.84078e-07	TRUE	82	73	0.0801246
Q922S4	Q922S4	>sp|Q922S4|PDE2A_MOUSE cGMP-dependent 3',5'-cyclic phosphodiesterase OS=Mus musculus (Mouse) OX=10090 GN=Pde2a PE=1 SV=4	PDE2A	19	11	-1.07704	1.8605e-07	1.91134e-06	TRUE	130	139	-0.296521
P24369	P24369	>sp|P24369|PPIB_MOUSE Peptidyl-prolyl cis-trans isomerase B OS=Mus musculus (Mouse) OX=10090 GN=Ppib PE=1 SV=2	PPIB	11	7	-0.370732	1.17281e-05	6.40727e-05	TRUE	83	70	0.192364
Q9JK42	Q9JK42	>sp|Q9JK42|PDK2_MOUSE [Pyruvate dehydrogenase (acetyl-transferring)] kinase isozyme 2, mitochondrial OS=Mus musculus (Mouse) OX=10090 GN=Pdk2 PE=1 SV=2	PDK2	7	5	-0.561684	2.0705e-05	0.000105156	TRUE	55	53	-0.0854493
Q3UHB8	Q3UHB8	>sp|Q3UHB8|CC177_MOUSE Coiled-coil domain-containing protein 177 OS=Mus musculus (Mouse) OX=10090 GN=Ccdc177 PE=1 SV=1	CCDC177	4	3	-0.386378	0.00414663	0.0104369	FALSE	31	26	0.205149
P00416	P00416	>sp|P00416|COX3_MOUSE Cytochrome c oxidase subunit 3 OS=Mus musculus (Mouse) OX=10090 GN=mt-Co3 PE=1 SV=2	MT-CO3	1	1	-0.429645	0.00116643	0.00344328	TRUE	10	8	0.266117
Q91XM9	Q91XM9	>sp|Q91XM9|DLG2_MOUSE Disks large homolog 2 OS=Mus musculus (Mouse) OX=10090 GN=Dlg2 PE=1 SV=2	DLG2	20	16	-0.491386	4.39838e-07	3.94252e-06	TRUE	172	147	0.174714
Q9WTT4	Q9WTT4	>sp|Q9WTT4|VATG2_MOUSE V-type proton ATPase subunit G 2 OS=Mus musculus (Mouse) OX=10090 GN=Atp6v1g2 PE=1 SV=1	ATP6V1G2	6	4	-0.318419	0.0112448	0.0253137	FALSE	44	39	0.0872951
Q63810	Q63810	>sp|Q63810|CANB1_MOUSE Calcineurin subunit B type 1 OS=Mus musculus (Mouse) OX=10090 GN=Ppp3r1 PE=1 SV=3	PPP3R1	9	7	-0.983216	1.08378e-06	8.28759e-06	TRUE	77	65	0.186753
Q9Z127	Q9Z127	>sp|Q9Z127|LAT1_MOUSE Large neutral amino acids transporter small subunit 1 OS=Mus musculus (Mouse) OX=10090 GN=Slc7a5 PE=1 SV=2	SLC7A5	7	6	-0.464189	0.000211329	0.000776737	TRUE	61	53	0.132857
Q8CH77	Q8CH77	>sp|Q8CH77|NAV1_MOUSE Neuron navigator 1 OS=Mus musculus (Mouse) OX=10090 GN=Nav1 PE=1 SV=2	NAV1	17	4	0.0569528	0.664914	0.740708	FALSE	79	90	-0.436656
Q8BGT1	Q8BGT1	>sp|Q8BGT1|FLRT3_MOUSE Leucine-rich repeat transmembrane protein FLRT3 OS=Mus musculus (Mouse) OX=10090 GN=Flrt3 PE=1 SV=1	FLRT3	6	3	0.312154	0.00136999	0.00394317	TRUE	52	30	0.949809
Q8BXR1	Q8BXR1	>sp|Q8BXR1|S7A14_MOUSE Probable cationic amino acid transporter OS=Mus musculus (Mouse) OX=10090 GN=Slc7a14 PE=1 SV=1	SLC7A14	8	7	-0.00982581	0.902206	0.929504	FALSE	71	60	0.186869
Q9ERG2	Q9ERG2	>sp|Q9ERG2|STRN3_MOUSE Striatin-3 OS=Mus musculus (Mouse) OX=10090 GN=Strn3 PE=1 SV=1	STRN3	10	6	-0.597006	1.80335e-06	1.28465e-05	TRUE	77	75	-0.0942846
Q8C1B7;Q8CHH9;Q9R1T4	Q8C1B7;Q8CHH9;Q9R1T4	>sp|Q8C1B7|SEP11_MOUSE Septin-11 OS=Mus musculus (Mouse) OX=10090 GN=Septin11 PE=1 SV=4;>sp|Q8CHH9|SEPT8_MOUSE Septin-8 OS=Mus musculus (Mouse) OX=10090 GN=Septin8 PE=1 SV=4;>sp|Q9R1T4|SEPT6_MOUSE Septin-6 OS=Mus musculus (Mouse) OX=10090 GN=Septin6 PE=1 SV=4	SEPTIN11;SEPTIN8;SEPTIN6	3	3	-0.504076	0.0001125	0.000451168	TRUE	28	23	0.231578
Q9DC28	Q9DC28	>sp|Q9DC28|KC1D_MOUSE Casein kinase I isoform delta OS=Mus musculus (Mouse) OX=10090 GN=Csnk1d PE=1 SV=2	CSNK1D	2	1	-0.717322	0.000323622	0.00112965	TRUE	14	14	-0.171731
Q8VDP3	Q8VDP3	>sp|Q8VDP3|MICA1_MOUSE [F-actin]-monooxygenase MICAL1 OS=Mus musculus (Mouse) OX=10090 GN=Mical1 PE=1 SV=1	MICAL1	2	0					5	6	-0.467308
Q9CYT6	Q9CYT6	>sp|Q9CYT6|CAP2_MOUSE Adenylyl cyclase-associated protein 2 OS=Mus musculus (Mouse) OX=10090 GN=Cap2 PE=1 SV=1	CAP2	19	7	-2.12717	3.05364e-13	7.82995e-11	TRUE	91	131	-0.895229
P63024;P63044	P63024;P63044	>sp|P63024|VAMP3_MOUSE Vesicle-associated membrane protein 3 OS=Mus musculus (Mouse) OX=10090 GN=Vamp3 PE=1 SV=1;>sp|P63044|VAMP2_MOUSE Vesicle-associated membrane protein 2 OS=Mus musculus (Mouse) OX=10090 GN=Vamp2 PE=1 SV=2	VAMP3;VAMP2	2	2	-0.268706	0.0287732	0.0565848	FALSE	20	16	0.286542
Q9Z2A5	Q9Z2A5	>sp|Q9Z2A5|ATE1_MOUSE Arginyl-tRNA--protein transferase 1 OS=Mus musculus (Mouse) OX=10090 GN=Ate1 PE=1 SV=2	ATE1	4	0					14	19	-0.748596
Q3TXX4;Q8BLE7	Q3TXX4;Q8BLE7	>sp|Q3TXX4|VGLU1_MOUSE Vesicular glutamate transporter 1 OS=Mus musculus (Mouse) OX=10090 GN=Slc17a7 PE=1 SV=2;>sp|Q8BLE7|VGLU2_MOUSE Vesicular glutamate transporter 2 OS=Mus musculus (Mouse) OX=10090 GN=Slc17a6 PE=1 SV=1	SLC17A7;SLC17A6	1	1	-0.205558	0.642528	0.722011	FALSE	10	8	0.266117
P39655	P39655	>sp|P39655|LOX12_MOUSE Arachidonate 12-lipoxygenase, 12S-type OS=Mus musculus (Mouse) OX=10090 GN=Alox12 PE=1 SV=4	ALOX12	2	1	-1.01284	7.33888e-07	6.00173e-06	TRUE	8	10	-0.547471
D3YZI9	D3YZI9	>sp|D3YZI9|PGBD5_MOUSE PiggyBac transposable element-derived protein 5 OS=Mus musculus (Mouse) OX=10090 GN=Pgbd5 PE=1 SV=1	PGBD5	6	2	-0.724022	3.57952e-07	3.30709e-06	TRUE	30	45	-0.984395
P47915	P47915	>sp|P47915|RL29_MOUSE 60S ribosomal protein L29 OS=Mus musculus (Mouse) OX=10090 GN=Rpl29 PE=1 SV=2	RPL29	2	1	0.138629	0.48165	0.58051	FALSE	16	15	-0.0414727
P63085;Q63844	P63085;Q63844	>sp|P63085|MK01_MOUSE Mitogen-activated protein kinase 1 OS=Mus musculus (Mouse) OX=10090 GN=Mapk1 PE=1 SV=3;>sp|Q63844|MK03_MOUSE Mitogen-activated protein kinase 3 OS=Mus musculus (Mouse) OX=10090 GN=Mapk3 PE=1 SV=5	MAPK1;MAPK3	3	3	-0.118735	0.238978	0.335393	FALSE	30	24	0.293811
Q00493	Q00493	>sp|Q00493|CBPE_MOUSE Carboxypeptidase E OS=Mus musculus (Mouse) OX=10090 GN=Cpe PE=1 SV=2	CPE	18	15	-0.25615	0.00111384	0.00330609	TRUE	150	126	0.199009
Q8BU14	Q8BU14	>sp|Q8BU14|SEC62_MOUSE Translocation protein SEC62 OS=Mus musculus (Mouse) OX=10090 GN=Sec62 PE=1 SV=1	SEC62	2	0					11	12	-0.308872
Q80VP1	Q80VP1	>sp|Q80VP1|EPN1_MOUSE Epsin-1 OS=Mus musculus (Mouse) OX=10090 GN=Epn1 PE=1 SV=3	EPN1	7	6	-0.0614943	0.513539	0.611683	FALSE	61	51	0.216221
Q91W34	Q91W34	>sp|Q91W34|RUS1_MOUSE RUS1 family protein C16orf58 homolog OS=Mus musculus (Mouse) OX=10090 GN=MGI:2384572 PE=1 SV=1	MGI:2384572	2	1	0.215652	0.0855566	0.142	FALSE	16	13	0.253477
Q8R3Z5	Q8R3Z5	>sp|Q8R3Z5|CACB1_MOUSE Voltage-dependent L-type calcium channel subunit beta-1 OS=Mus musculus (Mouse) OX=10090 GN=Cacnb1 PE=1 SV=1	CACNB1	7	3	-0.604663	1.18435e-05	6.45112e-05	TRUE	46	48	-0.239811
O08914	O08914	>sp|O08914|FAAH1_MOUSE Fatty-acid amide hydrolase 1 OS=Mus musculus (Mouse) OX=10090 GN=Faah PE=1 SV=1	FAAH	7	4	-0.189989	0.322935	0.426119	FALSE	48	40	0.207069
Q9JJA9	Q9JJA9	>sp|Q9JJA9|GRASP_MOUSE General receptor for phosphoinositides 1-associated scaffold protein OS=Mus musculus (Mouse) OX=10090 GN=Grasp PE=1 SV=2	GRASP	2	0					9	11	-0.554514
P11214	P11214	>sp|P11214|TPA_MOUSE Tissue-type plasminogen activator OS=Mus musculus (Mouse) OX=10090 GN=Plat PE=1 SV=3	PLAT	3	2	-0.301597	0.00797899	0.0187492	FALSE	27	24	0.0633389
Q8R104	Q8R104	>sp|Q8R104|SIR3_MOUSE NAD-dependent protein deacetylase sirtuin-3 OS=Mus musculus (Mouse) OX=10090 GN=Sirt3 PE=1 SV=2	SIRT3	3	0					13	16	-0.577285
Q8R3R8	Q8R3R8	>sp|Q8R3R8|GBRL1_MOUSE Gamma-aminobutyric acid receptor-associated protein-like 1 OS=Mus musculus (Mouse) OX=10090 GN=Gabarapl1 PE=1 SV=2	GABARAPL1	2	1	-0.475599	0.00184497	0.00511977	TRUE	14	14	-0.157582
Q64687	Q64687	>sp|Q64687|SIA8A_MOUSE Alpha-N-acetylneuraminide alpha-2,8-sialyltransferase OS=Mus musculus (Mouse) OX=10090 GN=St8sia1 PE=1 SV=2	ST8SIA1	1	1	-0.300491	0.0175987	0.0373499	FALSE	9	8	0.0684476
P28661;Q9Z2Q6	P28661;Q9Z2Q6	>sp|P28661|SEPT4_MOUSE Septin-4 OS=Mus musculus (Mouse) OX=10090 GN=Septin4 PE=1 SV=1;>sp|Q9Z2Q6|SEPT5_MOUSE Septin-5 OS=Mus musculus (Mouse) OX=10090 GN=Septin5 PE=1 SV=2	SEPTIN4;SEPTIN5	3	2	-0.491229	5.56784e-05	0.000244876	TRUE	22	21	-0.0490777
P63024;P63044;Q62442	P63024;P63044;Q62442	>sp|P63024|VAMP3_MOUSE Vesicle-associated membrane protein 3 OS=Mus musculus (Mouse) OX=10090 GN=Vamp3 PE=1 SV=1;>sp|P63044|VAMP2_MOUSE Vesicle-associated membrane protein 2 OS=Mus musculus (Mouse) OX=10090 GN=Vamp2 PE=1 SV=2;>sp|Q62442|VAMP1_MOUSE Vesicle-associated membrane protein 1 OS=Mus musculus (Mouse) OX=10090 GN=Vamp1 PE=1 SV=1	VAMP3;VAMP2;VAMP1	1	1	-0.576183	0.00597824	0.0145662	FALSE	10	8	0.266117
Q9WVJ3	Q9WVJ3	>sp|Q9WVJ3|CBPQ_MOUSE Carboxypeptidase Q OS=Mus musculus (Mouse) OX=10090 GN=Cpq PE=1 SV=1	CPQ	4	0					16	22	-0.774431
Q8K377	Q8K377	>sp|Q8K377|LRRT1_MOUSE Leucine-rich repeat transmembrane neuronal protein 1 OS=Mus musculus (Mouse) OX=10090 GN=Lrrtm1 PE=2 SV=1	LRRTM1	4	3	-0.253007	0.0699739	0.12019	FALSE	32	27	0.178641
Q920P5	Q920P5	>sp|Q920P5|KAD5_MOUSE Adenylate kinase isoenzyme 5 OS=Mus musculus (Mouse) OX=10090 GN=Ak5 PE=1 SV=2	AK5	14	12	-0.012557	0.920055	0.941361	FALSE	125	109	0.126624
Q5NCF2	Q5NCF2	>sp|Q5NCF2|TPPC1_MOUSE Trafficking protein particle complex subunit 1 OS=Mus musculus (Mouse) OX=10090 GN=Trappc1 PE=1 SV=1	TRAPPC1	5	4	-0.121187	0.104939	0.16919	FALSE	41	34	0.217006
Q3UHD9	Q3UHD9	>sp|Q3UHD9|AGAP2_MOUSE Arf-GAP with GTPase, ANK repeat and PH domain-containing protein 2 OS=Mus musculus (Mouse) OX=10090 GN=Agap2 PE=1 SV=1	AGAP2	20	11	-0.514122	2.09062e-09	4.77578e-08	TRUE	151	147	-0.108887
Q6P4S6	Q6P4S6	>sp|Q6P4S6|SIK3_MOUSE Serine/threonine-protein kinase SIK3 OS=Mus musculus (Mouse) OX=10090 GN=Sik3 PE=1 SV=3	SIK3	11	5	-0.472157	1.02388e-05	5.67379e-05	TRUE	70	65	0.00193613
P10639	P10639	>sp|P10639|THIO_MOUSE Thioredoxin OS=Mus musculus (Mouse) OX=10090 GN=Txn PE=1 SV=3	TXN	3	2	-1.15179	0.00132044	0.00381681	TRUE	21	22	-0.264194
P22725	P22725	>sp|P22725|WNT5A_MOUSE Protein Wnt-5a OS=Mus musculus (Mouse) OX=10090 GN=Wnt5a PE=1 SV=2	WNT5A	1	1	-0.637996	0.00183268	0.00509873	TRUE	10	8	0.266117
P15105	P15105	>sp|P15105|GLNA_MOUSE Glutamine synthetase OS=Mus musculus (Mouse) OX=10090 GN=Glul PE=1 SV=6	GLUL	8	2	-2.63456	3.77836e-13	8.52335e-11	TRUE	38	60	-1.08749
P43277	P43277	>sp|P43277|H13_MOUSE Histone H1.3 OS=Mus musculus (Mouse) OX=10090 GN=H1-3 PE=1 SV=2	H1-3	3	2	-0.010724	0.960579	0.971162	FALSE	27	24	0.0772536
P59759	P59759	>sp|P59759|MRTFB_MOUSE Myocardin-related transcription factor B OS=Mus musculus (Mouse) OX=10090 GN=Mrtfb PE=1 SV=1	MRTFB	6	0					5	43	-4.295
Q8BW96;Q91YS8	Q8BW96;Q91YS8	>sp|Q8BW96|KCC1D_MOUSE Calcium/calmodulin-dependent protein kinase type 1D OS=Mus musculus (Mouse) OX=10090 GN=Camk1d PE=1 SV=2;>sp|Q91YS8|KCC1A_MOUSE Calcium/calmodulin-dependent protein kinase type 1 OS=Mus musculus (Mouse) OX=10090 GN=Camk1 PE=1 SV=1	CAMK1D;CAMK1	4	3	-0.498595	0.00129891	0.00376462	TRUE	36	31	0.150264
Q6P9S0	Q6P9S0	>sp|Q6P9S0|MTSS2_MOUSE Protein MTSS 2 OS=Mus musculus (Mouse) OX=10090 GN=Mtss2 PE=1 SV=1	MTSS2	4	0					12	21	-1.26846
Q6PH08	Q6PH08	>sp|Q6PH08|ERC2_MOUSE ERC protein 2 OS=Mus musculus (Mouse) OX=10090 GN=Erc2 PE=1 SV=2	ERC2	21	6	-0.678866	2.51892e-06	1.71109e-05	TRUE	94	131	-0.859278
Q8R0S2	Q8R0S2	>sp|Q8R0S2|IQEC1_MOUSE IQ motif and SEC7 domain-containing protein 1 OS=Mus musculus (Mouse) OX=10090 GN=Iqsec1 PE=1 SV=2	IQSEC1	15	7	-1.56964	1.56267e-13	6.04305e-11	TRUE	82	107	-0.715534
P70362	P70362	>sp|P70362|UFD1_MOUSE Ubiquitin recognition factor in ER-associated degradation protein 1 OS=Mus musculus (Mouse) OX=10090 GN=Ufd1 PE=1 SV=2	UFD1	6	4	-1.06936	8.67017e-12	6.78351e-10	TRUE	44	48	-0.345514
Q8BHJ5;Q9QXE7	Q8BHJ5;Q9QXE7	>sp|Q8BHJ5|TBL1R_MOUSE F-box-like/WD repeat-containing protein TBL1XR1 OS=Mus musculus (Mouse) OX=10090 GN=Tbl1xr1 PE=1 SV=1;>sp|Q9QXE7|TBL1X_MOUSE F-box-like/WD repeat-containing protein TBL1X OS=Mus musculus (Mouse) OX=10090 GN=Tbl1x PE=1 SV=2	TBL1XR1;TBL1X	3	1	-0.493439	0.0010761	0.00321522	TRUE	18	23	-0.658111
Q9Z0L8	Q9Z0L8	>sp|Q9Z0L8|GGH_MOUSE Gamma-glutamyl hydrolase OS=Mus musculus (Mouse) OX=10090 GN=Ggh PE=1 SV=2	GGH	7	4	0.0331817	0.790341	0.842802	FALSE	56	43	0.370375
Q62086	Q62086	>sp|Q62086|PON2_MOUSE Serum paraoxonase/arylesterase 2 OS=Mus musculus (Mouse) OX=10090 GN=Pon2 PE=1 SV=2	PON2	7	0					9	32	-2.6668
Q62420	Q62420	>sp|Q62420|SH3G2_MOUSE Endophilin-A1 OS=Mus musculus (Mouse) OX=10090 GN=Sh3gl2 PE=1 SV=2	SH3GL2	10	8	-0.667989	2.86637e-08	4.08382e-07	TRUE	83	71	0.16388
Q9Z0G0	Q9Z0G0	>sp|Q9Z0G0|GIPC1_MOUSE PDZ domain-containing protein GIPC1 OS=Mus musculus (Mouse) OX=10090 GN=Gipc1 PE=1 SV=1	GIPC1	9	5	-0.455854	3.99237e-06	2.55795e-05	TRUE	74	63	0.174416
P84309	P84309	>sp|P84309|ADCY5_MOUSE Adenylate cyclase type 5 OS=Mus musculus (Mouse) OX=10090 GN=Adcy5 PE=1 SV=2	ADCY5	7	3	0.187554	0.233717	0.329003	FALSE	54	47	0.100114
Q9D1R9	Q9D1R9	>sp|Q9D1R9|RL34_MOUSE 60S ribosomal protein L34 OS=Mus musculus (Mouse) OX=10090 GN=Rpl34 PE=1 SV=2	RPL34	4	4	0.54286	0.0344903	0.0661461	FALSE	38	31	0.262127
O88456	O88456	>sp|O88456|CPNS1_MOUSE Calpain small subunit 1 OS=Mus musculus (Mouse) OX=10090 GN=Capns1 PE=1 SV=1	CAPNS1	3	1	-0.551722	0.000344081	0.00119032	TRUE	22	23	-0.262696
P0C0A3	P0C0A3	>sp|P0C0A3|CHMP6_MOUSE Charged multivesicular body protein 6 OS=Mus musculus (Mouse) OX=10090 GN=Chmp6 PE=1 SV=2	CHMP6	1	1	-0.0366803	0.812123	0.860437	FALSE	9	8	0.0717842
Q9QYC0	Q9QYC0	>sp|Q9QYC0|ADDA_MOUSE Alpha-adducin OS=Mus musculus (Mouse) OX=10090 GN=Add1 PE=1 SV=2	ADD1	22	19	-0.466004	1.32519e-05	7.10882e-05	TRUE	196	167	0.178421
Q920I9	Q920I9	>sp|Q920I9|WDR7_MOUSE WD repeat-containing protein 7 OS=Mus musculus (Mouse) OX=10090 GN=Wdr7 PE=1 SV=3	WDR7	39	34	-0.0887014	0.113184	0.180123	FALSE	353	297	0.202094
Q3URE9;Q9D1T0	Q3URE9;Q9D1T0	>sp|Q3URE9|LIGO2_MOUSE Leucine-rich repeat and immunoglobulin-like domain-containing nogo receptor-interacting protein 2 OS=Mus musculus (Mouse) OX=10090 GN=Lingo2 PE=2 SV=1;>sp|Q9D1T0|LIGO1_MOUSE Leucine-rich repeat and immunoglobulin-like domain-containing nogo receptor-interacting protein 1 OS=Mus musculus (Mouse) OX=10090 GN=Lingo1 PE=1 SV=1	LINGO2;LINGO1	1	1	-0.589183	0.00115046	0.0034036	TRUE	10	8	0.266117
Q8CDU6	Q8CDU6	>sp|Q8CDU6|HECD2_MOUSE Probable E3 ubiquitin-protein ligase HECTD2 OS=Mus musculus (Mouse) OX=10090 GN=Hectd2 PE=1 SV=2	HECTD2	4	2	-0.46978	0.00021972	0.000804847	TRUE	27	29	-0.301854
Q9JK48	Q9JK48	>sp|Q9JK48|SHLB1_MOUSE Endophilin-B1 OS=Mus musculus (Mouse) OX=10090 GN=Sh3glb1 PE=1 SV=1	SH3GLB1	11	10	-0.534361	7.0627e-09	1.26196e-07	TRUE	95	86	0.0500784
Q80TZ3	Q80TZ3	>sp|Q80TZ3|AUXI_MOUSE Putative tyrosine-protein phosphatase auxilin OS=Mus musculus (Mouse) OX=10090 GN=Dnajc6 PE=1 SV=2	DNAJC6	16	8	-0.911581	5.98152e-09	1.09405e-07	TRUE	117	120	-0.21359
Q8BTH8;Q8C4X2	Q8BTH8;Q8C4X2	>sp|Q8BTH8|KC1G1_MOUSE Casein kinase I isoform gamma-1 OS=Mus musculus (Mouse) OX=10090 GN=Csnk1g1 PE=1 SV=2;>sp|Q8C4X2|KC1G3_MOUSE Casein kinase I isoform gamma-3 OS=Mus musculus (Mouse) OX=10090 GN=Csnk1g3 PE=1 SV=2	CSNK1G1;CSNK1G3	2	1	0.217311	0.151859	0.231595	FALSE	19	12	0.754713
A2ALS5	A2ALS5	>sp|A2ALS5|RPGP1_MOUSE Rap1 GTPase-activating protein 1 OS=Mus musculus (Mouse) OX=10090 GN=Rap1gap PE=1 SV=2	RAP1GAP	8	0					18	57	-2.49939
Q9EQP2;Q9QXY6;Q9WVK4	Q9EQP2;Q9QXY6;Q9WVK4	>sp|Q9EQP2|EHD4_MOUSE EH domain-containing protein 4 OS=Mus musculus (Mouse) OX=10090 GN=Ehd4 PE=1 SV=1;>sp|Q9QXY6|EHD3_MOUSE EH domain-containing protein 3 OS=Mus musculus (Mouse) OX=10090 GN=Ehd3 PE=1 SV=2;>sp|Q9WVK4|EHD1_MOUSE EH domain-containing protein 1 OS=Mus musculus (Mouse) OX=10090 GN=Ehd1 PE=1 SV=1	EHD4;EHD3;EHD1	2	2	-0.0588656	0.66135	0.737801	FALSE	20	16	0.286542
P50518;Q9D593	P50518;Q9D593	>sp|P50518|VATE1_MOUSE V-type proton ATPase subunit E 1 OS=Mus musculus (Mouse) OX=10090 GN=Atp6v1e1 PE=1 SV=2;>sp|Q9D593|VATE2_MOUSE V-type proton ATPase subunit E 2 OS=Mus musculus (Mouse) OX=10090 GN=Atp6v1e2 PE=1 SV=1	ATP6V1E1;ATP6V1E2	4	1	-0.0281652	0.739958	0.800789	FALSE	28	26	-0.0258129
P24668	P24668	>sp|P24668|MPRD_MOUSE Cation-dependent mannose-6-phosphate receptor OS=Mus musculus (Mouse) OX=10090 GN=M6pr PE=1 SV=1	M6PR	4	3	-0.15508	0.064292	0.111527	FALSE	30	28	-0.0101416
D3Z660	D3Z660	>tr|D3Z660|D3Z660_MOUSE SERPIN domain-containing protein OS=Mus musculus (Mouse) OX=10090 GN=Serpina16 PE=3 SV=1	SERPINA16	1	1	-0.220296	0.091722	0.150343	FALSE	9	7	0.346252
Q68FL4;Q80SW1	Q68FL4;Q80SW1	>sp|Q68FL4|SAHH3_MOUSE Putative adenosylhomocysteinase 3 OS=Mus musculus (Mouse) OX=10090 GN=Ahcyl2 PE=1 SV=1;>sp|Q80SW1|SAHH2_MOUSE S-adenosylhomocysteine hydrolase-like protein 1 OS=Mus musculus (Mouse) OX=10090 GN=Ahcyl1 PE=1 SV=1	AHCYL2;AHCYL1	8	7	-0.475242	2.87735e-07	2.75229e-06	TRUE	71	59	0.221577
Q99N28	Q99N28	>sp|Q99N28|CADM3_MOUSE Cell adhesion molecule 3 OS=Mus musculus (Mouse) OX=10090 GN=Cadm3 PE=1 SV=1	CADM3	8	5	-0.344501	0.0291968	0.0572723	FALSE	61	58	-0.0727762
Q5F2E8;Q8BYC6	Q5F2E8;Q8BYC6	>sp|Q5F2E8|TAOK1_MOUSE Serine/threonine-protein kinase TAO1 OS=Mus musculus (Mouse) OX=10090 GN=Taok1 PE=1 SV=1;>sp|Q8BYC6|TAOK3_MOUSE Serine/threonine-protein kinase TAO3 OS=Mus musculus (Mouse) OX=10090 GN=Taok3 PE=1 SV=2	TAOK1;TAOK3	1	1	-0.277264	0.0298215	0.0582235	FALSE	10	8	0.266117
Q5DQR4	Q5DQR4	>sp|Q5DQR4|STB5L_MOUSE Syntaxin-binding protein 5-like OS=Mus musculus (Mouse) OX=10090 GN=Stxbp5l PE=1 SV=1	STXBP5L	15	11	-0.535815	4.77738e-05	0.000215002	TRUE	129	118	0.0220286
Q8C8R3	Q8C8R3	>sp|Q8C8R3|ANK2_MOUSE Ankyrin-2 OS=Mus musculus (Mouse) OX=10090 GN=Ank2 PE=1 SV=2	ANK2	43	24	-0.141575	0.538137	0.632854	FALSE	324	281	0.137457
Q9JLC8	Q9JLC8	>sp|Q9JLC8|SACS_MOUSE Sacsin OS=Mus musculus (Mouse) OX=10090 GN=Sacs PE=1 SV=2	SACS	1	1	-0.164872	0.704552	0.772311	FALSE	9	7	0.346252
Q60648	Q60648	>sp|Q60648|SAP3_MOUSE Ganglioside GM2 activator OS=Mus musculus (Mouse) OX=10090 GN=Gm2a PE=1 SV=2	GM2A	5	4	-1.28241	1.13227e-11	8.43174e-10	TRUE	46	38	0.229637
P43274	P43274	>sp|P43274|H14_MOUSE Histone H1.4 OS=Mus musculus (Mouse) OX=10090 GN=H1-4 PE=1 SV=2	H1-4	3	3	0.0757218	0.57338	0.662741	FALSE	28	21	0.434323
Q8R2R9;Q9JKC8	Q8R2R9;Q9JKC8	>sp|Q8R2R9|AP3M2_MOUSE AP-3 complex subunit mu-2 OS=Mus musculus (Mouse) OX=10090 GN=Ap3m2 PE=1 SV=1;>sp|Q9JKC8|AP3M1_MOUSE AP-3 complex subunit mu-1 OS=Mus musculus (Mouse) OX=10090 GN=Ap3m1 PE=1 SV=1	AP3M2;AP3M1	3	3	-0.192034	0.167046	0.250038	FALSE	29	23	0.311352
Q80XH4	Q80XH4	>sp|Q80XH4|WSCD1_MOUSE WSC domain-containing protein 1 OS=Mus musculus (Mouse) OX=10090 GN=Wscd1 PE=2 SV=1	WSCD1	4	0					12	23	-1.41432
P20444;P63318	P20444;P63318	>sp|P20444|KPCA_MOUSE Protein kinase C alpha type OS=Mus musculus (Mouse) OX=10090 GN=Prkca PE=1 SV=3;>sp|P63318|KPCG_MOUSE Protein kinase C gamma type OS=Mus musculus (Mouse) OX=10090 GN=Prkcg PE=1 SV=1	PRKCA;PRKCG	1	1	-0.472156	0.00125386	0.00366345	TRUE	10	8	0.266117
P63044	P63044	>sp|P63044|VAMP2_MOUSE Vesicle-associated membrane protein 2 OS=Mus musculus (Mouse) OX=10090 GN=Vamp2 PE=1 SV=2	VAMP2	4	2	-0.370657	0.00638197	0.0153975	FALSE	29	26	0.0657376
Q3UTQ8	Q3UTQ8	>sp|Q3UTQ8|CDKL5_MOUSE Cyclin-dependent kinase-like 5 OS=Mus musculus (Mouse) OX=10090 GN=Cdkl5 PE=1 SV=1	CDKL5	14	0					32	92	-2.32708
Q8BTI9	Q8BTI9	>sp|Q8BTI9|PK3CB_MOUSE Phosphatidylinositol 4,5-bisphosphate 3-kinase catalytic subunit beta isoform OS=Mus musculus (Mouse) OX=10090 GN=Pik3cb PE=1 SV=2	PIK3CB	1	0					7	7	-0.195213
Q9QUR8	Q9QUR8	>sp|Q9QUR8|SEM7A_MOUSE Semaphorin-7A OS=Mus musculus (Mouse) OX=10090 GN=Sema7a PE=1 SV=1	SEMA7A	6	1	-0.119393	0.374467	0.479056	FALSE	43	44	-0.221635
P60487	P60487	>sp|P60487|PLPP_MOUSE Pyridoxal phosphate phosphatase OS=Mus musculus (Mouse) OX=10090 GN=Pdxp PE=1 SV=1	PDXP	9	9	0.22576	0.0154147	0.0333554	FALSE	89	70	0.340004
P84075;Q91X97	P84075;Q91X97	>sp|P84075|HPCA_MOUSE Neuron-specific calcium-binding protein hippocalcin OS=Mus musculus (Mouse) OX=10090 GN=Hpca PE=1 SV=2;>sp|Q91X97|NCALD_MOUSE Neurocalcin-delta OS=Mus musculus (Mouse) OX=10090 GN=Ncald PE=1 SV=4	HPCA;NCALD	1	1	-0.692399	0.000303078	0.00106343	TRUE	10	8	0.266117
P19536	P19536	>sp|P19536|COX5B_MOUSE Cytochrome c oxidase subunit 5B, mitochondrial OS=Mus musculus (Mouse) OX=10090 GN=Cox5b PE=1 SV=1	COX5B	6	5	-0.63818	1.64244e-06	1.18404e-05	TRUE	54	44	0.265716
E9Q3L2	E9Q3L2	>sp|E9Q3L2|PI4KA_MOUSE Phosphatidylinositol 4-kinase alpha OS=Mus musculus (Mouse) OX=10090 GN=Pi4ka PE=1 SV=2	PI4KA	41	19	0.0645115	0.788719	0.841736	FALSE	297	219	0.454334
Q9D1T0	Q9D1T0	>sp|Q9D1T0|LIGO1_MOUSE Leucine-rich repeat and immunoglobulin-like domain-containing nogo receptor-interacting protein 1 OS=Mus musculus (Mouse) OX=10090 GN=Lingo1 PE=1 SV=1	LINGO1	8	4	-0.553091	1.42964e-06	1.05307e-05	TRUE	59	55	-0.0187294
P62900	P62900	>sp|P62900|RL31_MOUSE 60S ribosomal protein L31 OS=Mus musculus (Mouse) OX=10090 GN=Rpl31 PE=1 SV=1	RPL31	5	3	0.290177	0.0705248	0.120906	FALSE	43	33	0.372913
Q8R1N4	Q8R1N4	>sp|Q8R1N4|NUDC3_MOUSE NudC domain-containing protein 3 OS=Mus musculus (Mouse) OX=10090 GN=Nudcd3 PE=1 SV=3	NUDCD3	11	7	-0.0328271	0.61326	0.697959	FALSE	84	68	0.270009
Q80TL4	Q80TL4	>sp|Q80TL4|PHF24_MOUSE PHD finger protein 24 OS=Mus musculus (Mouse) OX=10090 GN=Phf24 PE=1 SV=2	PHF24	9	7	-1.01618	3.26959e-08	4.56226e-07	TRUE	68	68	-0.16214
P17182;P17183	P17182;P17183	>sp|P17182|ENOA_MOUSE Alpha-enolase OS=Mus musculus (Mouse) OX=10090 GN=Eno1 PE=1 SV=3;>sp|P17183|ENOG_MOUSE Gamma-enolase OS=Mus musculus (Mouse) OX=10090 GN=Eno2 PE=1 SV=2	ENO1;ENO2	1	1	-1.35689	4.23797e-10	1.34178e-08	TRUE	10	8	0.266117
Q8BJU0	Q8BJU0	>sp|Q8BJU0|SGTA_MOUSE Small glutamine-rich tetratricopeptide repeat-containing protein alpha OS=Mus musculus (Mouse) OX=10090 GN=Sgta PE=1 SV=2	SGTA	8	7	-0.274897	0.000462547	0.00153917	TRUE	69	58	0.203063
Q91VN0	Q91VN0	>sp|Q91VN0|LRP5_MOUSE Low-density lipoprotein receptor-related protein 5 OS=Mus musculus (Mouse) OX=10090 GN=Lrp5 PE=1 SV=3	LRP5	2	1	0.046698	0.748666	0.807426	FALSE	11	14	-0.622044
Q8BYM5;Q99K10	Q8BYM5;Q99K10	>sp|Q8BYM5|NLGN3_MOUSE Neuroligin-3 OS=Mus musculus (Mouse) OX=10090 GN=Nlgn3 PE=1 SV=2;>sp|Q99K10|NLGN1_MOUSE Neuroligin-1 OS=Mus musculus (Mouse) OX=10090 GN=Nlgn1 PE=1 SV=2	NLGN3;NLGN1	1	1	-1.89662	7.74627e-08	9.15683e-07	TRUE	10	8	0.266117
Q99K10	Q99K10	>sp|Q99K10|NLGN1_MOUSE Neuroligin-1 OS=Mus musculus (Mouse) OX=10090 GN=Nlgn1 PE=1 SV=2	NLGN1	3	0					8	17	-1.60192
Q8BTJ4	Q8BTJ4	>sp|Q8BTJ4|ENPP4_MOUSE Bis(5'-adenosyl)-triphosphatase enpp4 OS=Mus musculus (Mouse) OX=10090 GN=Enpp4 PE=1 SV=1	ENPP4	2	2	-0.477639	0.00855001	0.0199353	FALSE	20	16	0.286542
P51174	P51174	>sp|P51174|ACADL_MOUSE Long-chain specific acyl-CoA dehydrogenase, mitochondrial OS=Mus musculus (Mouse) OX=10090 GN=Acadl PE=1 SV=2	ACADL	14	8	-0.692784	3.83239e-05	0.000177947	TRUE	106	100	-0.0321057
P49769	P49769	>sp|P49769|PSN1_MOUSE Presenilin-1 OS=Mus musculus (Mouse) OX=10090 GN=Psen1 PE=1 SV=1	PSEN1	6	3	0.0495661	0.588289	0.676364	FALSE	46	38	0.242824
P12382;Q9WUA3	P12382;Q9WUA3	>sp|P12382|PFKAL_MOUSE ATP-dependent 6-phosphofructokinase, liver type OS=Mus musculus (Mouse) OX=10090 GN=Pfkl PE=1 SV=4;>sp|Q9WUA3|PFKAP_MOUSE ATP-dependent 6-phosphofructokinase, platelet type OS=Mus musculus (Mouse) OX=10090 GN=Pfkp PE=1 SV=1	PFKL;PFKP	2	1	-0.515107	0.000324639	0.00113174	TRUE	12	11	-0.000889252
G5E8K5;Q02357;Q8C8R3	G5E8K5;Q02357;Q8C8R3	>sp|G5E8K5|ANK3_MOUSE Ankyrin-3 OS=Mus musculus (Mouse) OX=10090 GN=Ank3 PE=1 SV=1;>sp|Q02357|ANK1_MOUSE Ankyrin-1 OS=Mus musculus (Mouse) OX=10090 GN=Ank1 PE=1 SV=2;>sp|Q8C8R3|ANK2_MOUSE Ankyrin-2 OS=Mus musculus (Mouse) OX=10090 GN=Ank2 PE=1 SV=2	ANK3;ANK1;ANK2	3	2	-0.12025	0.593222	0.680446	FALSE	23	18	0.34312
Q9JLB0;Q9WV34	Q9JLB0;Q9WV34	>sp|Q9JLB0|MPP6_MOUSE MAGUK p55 subfamily member 6 OS=Mus musculus (Mouse) OX=10090 GN=Mpp6 PE=1 SV=1;>sp|Q9WV34|MPP2_MOUSE MAGUK p55 subfamily member 2 OS=Mus musculus (Mouse) OX=10090 GN=Mpp2 PE=1 SV=1	MPP6;MPP2	1	1	-0.822771	0.00348852	0.00895536	TRUE	10	8	0.266117
P62835;Q99JI6	P62835;Q99JI6	>sp|P62835|RAP1A_MOUSE Ras-related protein Rap-1A OS=Mus musculus (Mouse) OX=10090 GN=Rap1a PE=1 SV=1;>sp|Q99JI6|RAP1B_MOUSE Ras-related protein Rap-1b OS=Mus musculus (Mouse) OX=10090 GN=Rap1b PE=1 SV=2	RAP1A;RAP1B	5	5	-0.0879881	0.0888869	0.146405	FALSE	50	40	0.299806
Q8R554	Q8R554	>sp|Q8R554|OTU7A_MOUSE OTU domain-containing protein 7A OS=Mus musculus (Mouse) OX=10090 GN=Otud7a PE=1 SV=1	OTUD7A	5	1	-0.664453	0.000303985	0.00106592	TRUE	23	23	-0.14486
Q9Z2Y3	Q9Z2Y3	>sp|Q9Z2Y3|HOME1_MOUSE Homer protein homolog 1 OS=Mus musculus (Mouse) OX=10090 GN=Homer1 PE=1 SV=2	HOMER1	18	7	-1.06768	1.41856e-11	9.97417e-10	TRUE	105	128	-0.563714
P62835	P62835	>sp|P62835|RAP1A_MOUSE Ras-related protein Rap-1A OS=Mus musculus (Mouse) OX=10090 GN=Rap1a PE=1 SV=1	RAP1A	2	1	-0.199983	0.172026	0.256076	FALSE	17	12	0.515314
O55131;Q8C650	O55131;Q8C650	>sp|O55131|SEPT7_MOUSE Septin-7 OS=Mus musculus (Mouse) OX=10090 GN=Septin7 PE=1 SV=1;>sp|Q8C650|SEP10_MOUSE Septin-10 OS=Mus musculus (Mouse) OX=10090 GN=Septin10 PE=1 SV=1	SEPTIN7;SEPTIN10	1	1	-0.524358	0.000476126	0.00158047	TRUE	10	8	0.266117
Q7TQF7	Q7TQF7	>sp|Q7TQF7|AMPH_MOUSE Amphiphysin OS=Mus musculus (Mouse) OX=10090 GN=Amph PE=1 SV=1	AMPH	18	15	-0.291072	0.00261803	0.00697198	TRUE	154	129	0.213509
P62761;Q8BGZ1	P62761;Q8BGZ1	>sp|P62761|VISL1_MOUSE Visinin-like protein 1 OS=Mus musculus (Mouse) OX=10090 GN=Vsnl1 PE=1 SV=2;>sp|Q8BGZ1|HPCL4_MOUSE Hippocalcin-like protein 4 OS=Mus musculus (Mouse) OX=10090 GN=Hpcal4 PE=1 SV=3	VSNL1;HPCAL4	3	3	-0.769474	1.30108e-06	9.68922e-06	TRUE	30	24	0.293811
Q8CFV4	Q8CFV4	>sp|Q8CFV4|NRN1_MOUSE Neuritin OS=Mus musculus (Mouse) OX=10090 GN=Nrn1 PE=1 SV=1	NRN1	2	1	-1.31163	1.19841e-06	9.06903e-06	TRUE	12	12	-0.162158
P20060	P20060	>sp|P20060|HEXB_MOUSE Beta-hexosaminidase subunit beta OS=Mus musculus (Mouse) OX=10090 GN=Hexb PE=1 SV=2	HEXB	11	6	-0.677473	8.24148e-08	9.67883e-07	TRUE	75	76	-0.193685
P43024	P43024	>sp|P43024|CX6A1_MOUSE Cytochrome c oxidase subunit 6A1, mitochondrial OS=Mus musculus (Mouse) OX=10090 GN=Cox6a1 PE=1 SV=2	COX6A1	3	1	-0.950209	6.62227e-05	0.000282307	TRUE	14	21	-0.903853
Q5DU25;Q8R0S2	Q5DU25;Q8R0S2	>sp|Q5DU25|IQEC2_MOUSE IQ motif and SEC7 domain-containing protein 2 OS=Mus musculus (Mouse) OX=10090 GN=Iqsec2 PE=1 SV=3;>sp|Q8R0S2|IQEC1_MOUSE IQ motif and SEC7 domain-containing protein 1 OS=Mus musculus (Mouse) OX=10090 GN=Iqsec1 PE=1 SV=2	IQSEC2;IQSEC1	3	1	-1.4451	3.3865e-08	4.67718e-07	TRUE	18	24	-0.722501
Q8VDZ4	Q8VDZ4	>sp|Q8VDZ4|ZDHC5_MOUSE Palmitoyltransferase ZDHHC5 OS=Mus musculus (Mouse) OX=10090 GN=Zdhhc5 PE=1 SV=1	ZDHHC5	2	0					5	14	-2.12922
Q8CA71	Q8CA71	>sp|Q8CA71|SHSA4_MOUSE Protein shisa-4 OS=Mus musculus (Mouse) OX=10090 GN=Shisa4 PE=1 SV=1	SHISA4	1	1	-0.985572	5.53873e-06	3.3845e-05	TRUE	8	8	-0.185031
P05132	P05132	>sp|P05132|KAPCA_MOUSE cAMP-dependent protein kinase catalytic subunit alpha OS=Mus musculus (Mouse) OX=10090 GN=Prkaca PE=1 SV=3	PRKACA	5	4	0.177316	0.207885	0.299651	FALSE	47	39	0.226382
P47708	P47708	>sp|P47708|RP3A_MOUSE Rabphilin-3A OS=Mus musculus (Mouse) OX=10090 GN=Rph3a PE=1 SV=2	RPH3A	22	10	-1.22252	6.43627e-13	1.20159e-10	TRUE	143	166	-0.471333
Q80TR1	Q80TR1	>sp|Q80TR1|AGRL1_MOUSE Adhesion G protein-coupled receptor L1 OS=Mus musculus (Mouse) OX=10090 GN=Adgrl1 PE=1 SV=2	ADGRL1	20	0					25	131	-3.53223
Q91VH2	Q91VH2	>sp|Q91VH2|SNX9_MOUSE Sorting nexin-9 OS=Mus musculus (Mouse) OX=10090 GN=Snx9 PE=1 SV=1	SNX9	3	2	-0.000704553	0.994317	0.995236	FALSE	21	14	0.650075
P21107;P58771;P58774	P21107;P58771;P58774	>sp|P21107|TPM3_MOUSE Tropomyosin alpha-3 chain OS=Mus musculus (Mouse) OX=10090 GN=Tpm3 PE=1 SV=3;>sp|P58771|TPM1_MOUSE Tropomyosin alpha-1 chain OS=Mus musculus (Mouse) OX=10090 GN=Tpm1 PE=1 SV=1;>sp|P58774|TPM2_MOUSE Tropomyosin beta chain OS=Mus musculus (Mouse) OX=10090 GN=Tpm2 PE=1 SV=1	TPM3;TPM1;TPM2	3	3	-0.590486	4.36229e-06	2.76227e-05	TRUE	28	23	0.248976
O89023	O89023	>sp|O89023|TPP1_MOUSE Tripeptidyl-peptidase 1 OS=Mus musculus (Mouse) OX=10090 GN=Tpp1 PE=1 SV=2	TPP1	5	2	-0.848888	3.36648e-06	2.21191e-05	TRUE	31	32	-0.237915
A2CG49	A2CG49	>sp|A2CG49|KALRN_MOUSE Kalirin OS=Mus musculus (Mouse) OX=10090 GN=Kalrn PE=1 SV=1	KALRN	8	3	-0.0434125	0.807597	0.85648	FALSE	50	44	0.0674562
Q8K296	Q8K296	>sp|Q8K296|MTMR3_MOUSE Myotubularin-related protein 3 OS=Mus musculus (Mouse) OX=10090 GN=Mtmr3 PE=1 SV=2	MTMR3	4	1	0.38646	0.00749012	0.0177945	FALSE	28	26	-0.0267851
Q8BLQ9	Q8BLQ9	>sp|Q8BLQ9|CADM2_MOUSE Cell adhesion molecule 2 OS=Mus musculus (Mouse) OX=10090 GN=Cadm2 PE=1 SV=2	CADM2	6	5	-1.10764	1.02079e-08	1.69526e-07	TRUE	51	46	0.0425839
Q8BK30	Q8BK30	>sp|Q8BK30|NDUV3_MOUSE NADH dehydrogenase [ubiquinone] flavoprotein 3, mitochondrial OS=Mus musculus (Mouse) OX=10090 GN=Ndufv3 PE=1 SV=1	NDUFV3	1	1	-0.562876	0.00533799	0.0131303	FALSE	10	8	0.266117
P17047	P17047	>sp|P17047|LAMP2_MOUSE Lysosome-associated membrane glycoprotein 2 OS=Mus musculus (Mouse) OX=10090 GN=Lamp2 PE=1 SV=2	LAMP2	7	5	-0.651133	3.61004e-07	3.3296e-06	TRUE	53	50	-0.0334439
F6SEU4;Q3UHC7	F6SEU4;Q3UHC7	>sp|F6SEU4|SYGP1_MOUSE Ras/Rap GTPase-activating protein SynGAP OS=Mus musculus (Mouse) OX=10090 GN=Syngap1 PE=1 SV=2;>sp|Q3UHC7|DAB2P_MOUSE Disabled homolog 2-interacting protein OS=Mus musculus (Mouse) OX=10090 GN=Dab2ip PE=1 SV=1	SYNGAP1;DAB2IP	3	1	-0.643975	1.68761e-05	8.80221e-05	TRUE	16	20	-0.596806
Q91YR1;Q9Z0P5	Q91YR1;Q9Z0P5	>sp|Q91YR1|TWF1_MOUSE Twinfilin-1 OS=Mus musculus (Mouse) OX=10090 GN=Twf1 PE=1 SV=2;>sp|Q9Z0P5|TWF2_MOUSE Twinfilin-2 OS=Mus musculus (Mouse) OX=10090 GN=Twf2 PE=1 SV=1	TWF1;TWF2	2	1	-0.633378	0.000134571	0.000524491	TRUE	14	14	-0.154628
P05064	P05064	>sp|P05064|ALDOA_MOUSE Fructose-bisphosphate aldolase A OS=Mus musculus (Mouse) OX=10090 GN=Aldoa PE=1 SV=2	ALDOA	21	18	-0.421808	8.88663e-06	5.06444e-05	TRUE	195	161	0.24131
Q9QXY6	Q9QXY6	>sp|Q9QXY6|EHD3_MOUSE EH domain-containing protein 3 OS=Mus musculus (Mouse) OX=10090 GN=Ehd3 PE=1 SV=2	EHD3	17	13	-0.300109	0.000359522	0.00123037	TRUE	153	122	0.315234
P63085	P63085	>sp|P63085|MK01_MOUSE Mitogen-activated protein kinase 1 OS=Mus musculus (Mouse) OX=10090 GN=Mapk1 PE=1 SV=3	MAPK1	17	12	-0.167341	0.0588902	0.10342	FALSE	137	115	0.207973
Q8BTH8	Q8BTH8	>sp|Q8BTH8|KC1G1_MOUSE Casein kinase I isoform gamma-1 OS=Mus musculus (Mouse) OX=10090 GN=Csnk1g1 PE=1 SV=2	CSNK1G1	1	1	0.564332	0.0143184	0.0312959	FALSE	10	8	0.266117
Q7TQD2	Q7TQD2	>sp|Q7TQD2|TPPP_MOUSE Tubulin polymerization-promoting protein OS=Mus musculus (Mouse) OX=10090 GN=Tppp PE=1 SV=1	TPPP	10	4	-0.923468	4.71136e-09	8.98145e-08	TRUE	58	64	-0.346088
Q9CXY1	Q9CXY1	>sp|Q9CXY1|TM175_MOUSE Endosomal/lysosomal potassium channel TMEM175 OS=Mus musculus (Mouse) OX=10090 GN=Tmem175 PE=1 SV=2	TMEM175	3	1	-0.795961	1.53962e-05	8.10849e-05	TRUE	9	16	-1.28382
O70161;P70181;P70182	O70161;P70181;P70182	>sp|O70161|PI51C_MOUSE Phosphatidylinositol 4-phosphate 5-kinase type-1 gamma OS=Mus musculus (Mouse) OX=10090 GN=Pip5k1c PE=1 SV=2;>sp|P70181|PI51B_MOUSE Phosphatidylinositol 4-phosphate 5-kinase type-1 beta OS=Mus musculus (Mouse) OX=10090 GN=Pip5k1b PE=1 SV=1;>sp|P70182|PI51A_MOUSE Phosphatidylinositol 4-phosphate 5-kinase type-1 alpha OS=Mus musculus (Mouse) OX=10090 GN=Pip5k1a PE=1 SV=2	PIP5K1C;PIP5K1B;PIP5K1A	1	1	-0.552026	2.39224e-05	0.000119369	TRUE	10	8	0.266117
P84309;Q01341	P84309;Q01341	>sp|P84309|ADCY5_MOUSE Adenylate cyclase type 5 OS=Mus musculus (Mouse) OX=10090 GN=Adcy5 PE=1 SV=2;>sp|Q01341|ADCY6_MOUSE Adenylate cyclase type 6 OS=Mus musculus (Mouse) OX=10090 GN=Adcy6 PE=1 SV=1	ADCY5;ADCY6	2	1	0.00949493	0.94421	0.95803	FALSE	14	12	0.145114
Q08890	Q08890	>sp|Q08890|IDS_MOUSE Iduronate 2-sulfatase OS=Mus musculus (Mouse) OX=10090 GN=Ids PE=2 SV=3	IDS	5	3	-0.195294	0.0490192	0.0884508	FALSE	44	38	0.153764
P27546	P27546	>sp|P27546|MAP4_MOUSE Microtubule-associated protein 4 OS=Mus musculus (Mouse) OX=10090 GN=Map4 PE=1 SV=3	MAP4	27	9	-1.27378	3.28039e-08	4.56556e-07	TRUE	131	139	-0.259871
Q9ESN9	Q9ESN9	>sp|Q9ESN9|JIP3_MOUSE C-Jun-amino-terminal kinase-interacting protein 3 OS=Mus musculus (Mouse) OX=10090 GN=Mapk8ip3 PE=1 SV=1	MAPK8IP3	23	15	-0.502285	3.30798e-08	4.58436e-07	TRUE	179	171	-0.0719579
P97300	P97300	>sp|P97300|NPTN_MOUSE Neuroplastin OS=Mus musculus (Mouse) OX=10090 GN=Nptn PE=1 SV=3	NPTN	10	7	-0.243743	0.00110016	0.00326909	FALSE	87	76	0.118421
Q80SW1	Q80SW1	>sp|Q80SW1|SAHH2_MOUSE S-adenosylhomocysteine hydrolase-like protein 1 OS=Mus musculus (Mouse) OX=10090 GN=Ahcyl1 PE=1 SV=1	AHCYL1	12	6	-1.06595	6.80793e-10	1.94183e-08	TRUE	72	77	-0.285283
Q8CJ40	Q8CJ40	>sp|Q8CJ40|CROCC_MOUSE Rootletin OS=Mus musculus (Mouse) OX=10090 GN=Crocc PE=1 SV=2	CROCC	7	1	-1.06945	4.24562e-09	8.4197e-08	TRUE	43	21	1.27287
P62748;P84075	P62748;P84075	>sp|P62748|HPCL1_MOUSE Hippocalcin-like protein 1 OS=Mus musculus (Mouse) OX=10090 GN=Hpcal1 PE=1 SV=2;>sp|P84075|HPCA_MOUSE Neuron-specific calcium-binding protein hippocalcin OS=Mus musculus (Mouse) OX=10090 GN=Hpca PE=1 SV=2	HPCAL1;HPCA	2	2	-0.60786	0.00209288	0.00571827	TRUE	20	16	0.286542
Q62419;Q62420	Q62419;Q62420	>sp|Q62419|SH3G1_MOUSE Endophilin-A2 OS=Mus musculus (Mouse) OX=10090 GN=Sh3gl1 PE=1 SV=1;>sp|Q62420|SH3G2_MOUSE Endophilin-A1 OS=Mus musculus (Mouse) OX=10090 GN=Sh3gl2 PE=1 SV=2	SH3GL1;SH3GL2	5	3	-0.499828	9.75125e-06	5.45385e-05	TRUE	40	31	0.349237
Q9WVF8	Q9WVF8	>sp|Q9WVF8|TUSC2_MOUSE Tumor suppressor candidate 2 OS=Mus musculus (Mouse) OX=10090 GN=Tusc2 PE=1 SV=3	TUSC2	2	0					3	10	-2.17636
O55143	O55143	>sp|O55143|AT2A2_MOUSE Sarcoplasmic/endoplasmic reticulum calcium ATPase 2 OS=Mus musculus (Mouse) OX=10090 GN=Atp2a2 PE=1 SV=2	ATP2A2	36	27	-0.908537	1.29362e-12	1.88568e-10	TRUE	304	269	0.0973795
O08539;Q7TQF7	O08539;Q7TQF7	>sp|O08539|BIN1_MOUSE Myc box-dependent-interacting protein 1 OS=Mus musculus (Mouse) OX=10090 GN=Bin1 PE=1 SV=1;>sp|Q7TQF7|AMPH_MOUSE Amphiphysin OS=Mus musculus (Mouse) OX=10090 GN=Amph PE=1 SV=1	BIN1;AMPH	2	2	-0.196376	0.111286	0.177677	FALSE	20	16	0.286542
Q8CHU3	Q8CHU3	>sp|Q8CHU3|EPN2_MOUSE Epsin-2 OS=Mus musculus (Mouse) OX=10090 GN=Epn2 PE=1 SV=1	EPN2	9	5	-1.11822	6.7593e-10	1.94183e-08	TRUE	61	63	-0.221497
P16388;P16390;P63141;Q61762	P16388;P16390;P63141;Q61762	>sp|P16388|KCNA1_MOUSE Potassium voltage-gated channel subfamily A member 1 OS=Mus musculus (Mouse) OX=10090 GN=Kcna1 PE=1 SV=1;>sp|P16390|KCNA3_MOUSE Potassium voltage-gated channel subfamily A member 3 OS=Mus musculus (Mouse) OX=10090 GN=Kcna3 PE=1 SV=3;>sp|P63141|KCNA2_MOUSE Potassium voltage-gated channel subfamily A member 2 OS=Mus musculus (Mouse) OX=10090 GN=Kcna2 PE=1 SV=1;>sp|Q61762|KCNA…	KCNA1;KCNA3;KCNA2;KCNA5	1	1	-0.011452	0.970439	0.978391	FALSE	10	8	0.266117
Q91XU3	Q91XU3	>sp|Q91XU3|PI42C_MOUSE Phosphatidylinositol 5-phosphate 4-kinase type-2 gamma OS=Mus musculus (Mouse) OX=10090 GN=Pip4k2c PE=1 SV=1	PIP4K2C	7	4	0.248997	0.14601	0.224319	FALSE	56	45	0.29565
Q62261	Q62261	>sp|Q62261|SPTB2_MOUSE Spectrin beta chain, non-erythrocytic 1 OS=Mus musculus (Mouse) OX=10090 GN=Sptbn1 PE=1 SV=2	SPTBN1	103	68	-0.183905	0.59002	0.677898	FALSE	829	663	0.301286
Q61548;Q7M6Y3	Q61548;Q7M6Y3	>sp|Q61548|AP180_MOUSE Clathrin coat assembly protein AP180 OS=Mus musculus (Mouse) OX=10090 GN=Snap91 PE=1 SV=1;>sp|Q7M6Y3|PICAL_MOUSE Phosphatidylinositol-binding clathrin assembly protein OS=Mus musculus (Mouse) OX=10090 GN=Picalm PE=1 SV=1	SNAP91;PICALM	2	2	-0.704796	3.81491e-06	2.4588e-05	TRUE	20	16	0.286542
P16388;P16390;P63141	P16388;P16390;P63141	>sp|P16388|KCNA1_MOUSE Potassium voltage-gated channel subfamily A member 1 OS=Mus musculus (Mouse) OX=10090 GN=Kcna1 PE=1 SV=1;>sp|P16390|KCNA3_MOUSE Potassium voltage-gated channel subfamily A member 3 OS=Mus musculus (Mouse) OX=10090 GN=Kcna3 PE=1 SV=3;>sp|P63141|KCNA2_MOUSE Potassium voltage-gated channel subfamily A member 2 OS=Mus musculus (Mouse) OX=10090 GN=Kcna2 PE=1 SV=1	KCNA1;KCNA3;KCNA2	1	1	-0.334099	0.433418	0.537578	FALSE	9	8	0.0794524
O35379	O35379	>sp|O35379|MRP1_MOUSE Multidrug resistance-associated protein 1 OS=Mus musculus (Mouse) OX=10090 GN=Abcc1 PE=1 SV=1	ABCC1	1	1	-0.402266	0.0448338	0.0821144	FALSE	9	8	0.0540382
O35465	O35465	>sp|O35465|FKBP8_MOUSE Peptidyl-prolyl cis-trans isomerase FKBP8 OS=Mus musculus (Mouse) OX=10090 GN=Fkbp8 PE=1 SV=2	FKBP8	5	5	-0.0756171	0.32555	0.428721	FALSE	50	40	0.299806
Q9D6K5	Q9D6K5	>sp|Q9D6K5|SYJ2B_MOUSE Synaptojanin-2-binding protein OS=Mus musculus (Mouse) OX=10090 GN=Synj2bp PE=1 SV=1	SYNJ2BP	5	3	-0.210002	0.0206839	0.0429712	FALSE	38	33	0.137885
Q9JI59	Q9JI59	>sp|Q9JI59|JAM2_MOUSE Junctional adhesion molecule B OS=Mus musculus (Mouse) OX=10090 GN=Jam2 PE=1 SV=1	JAM2	3	0					2	16	-3.82182
Q8BFP9;Q9JK42	Q8BFP9;Q9JK42	>sp|Q8BFP9|PDK1_MOUSE [Pyruvate dehydrogenase (acetyl-transferring)] kinase isozyme 1, mitochondrial OS=Mus musculus (Mouse) OX=10090 GN=Pdk1 PE=1 SV=2;>sp|Q9JK42|PDK2_MOUSE [Pyruvate dehydrogenase (acetyl-transferring)] kinase isozyme 2, mitochondrial OS=Mus musculus (Mouse) OX=10090 GN=Pdk2 PE=1 SV=2	PDK1;PDK2	1	1	-0.103802	0.359049	0.462654	FALSE	10	8	0.266117
Q64739	Q64739	>sp|Q64739|COBA2_MOUSE Collagen alpha-2(XI) chain OS=Mus musculus (Mouse) OX=10090 GN=Col11a2 PE=2 SV=3	COL11A2	1	0					5	6	-0.484703
Q9QYB8	Q9QYB8	>sp|Q9QYB8|ADDB_MOUSE Beta-adducin OS=Mus musculus (Mouse) OX=10090 GN=Add2 PE=1 SV=4	ADD2	20	14	-0.237649	0.0012683	0.00369568	FALSE	172	139	0.286518
O08529	O08529	>sp|O08529|CAN2_MOUSE Calpain-2 catalytic subunit OS=Mus musculus (Mouse) OX=10090 GN=Capn2 PE=1 SV=4	CAPN2	12	7	-0.166958	0.0728658	0.124368	FALSE	89	83	-0.0107933
Q8JZS0	Q8JZS0	>sp|Q8JZS0|LIN7A_MOUSE Protein lin-7 homolog A OS=Mus musculus (Mouse) OX=10090 GN=Lin7a PE=1 SV=2	LIN7A	4	4	-0.744928	1.82481e-08	2.75195e-07	TRUE	40	32	0.297538
Q07235	Q07235	>sp|Q07235|GDN_MOUSE Glia-derived nexin OS=Mus musculus (Mouse) OX=10090 GN=Serpine2 PE=1 SV=2	SERPINE2	18	9	-0.891993	2.59282e-06	1.7525e-05	TRUE	116	103	0.0828865
Q9DCR2	Q9DCR2	>sp|Q9DCR2|AP3S1_MOUSE AP-3 complex subunit sigma-1 OS=Mus musculus (Mouse) OX=10090 GN=Ap3s1 PE=1 SV=2	AP3S1	7	7	0.0278854	0.693423	0.763421	FALSE	67	55	0.248369
Q9Z2C4	Q9Z2C4	>sp|Q9Z2C4|MTMR1_MOUSE Myotubularin-related protein 1 OS=Mus musculus (Mouse) OX=10090 GN=Mtmr1 PE=1 SV=1	MTMR1	9	3	-0.660191	3.30874e-07	3.09387e-06	TRUE	37	47	-0.6222
A0A0A6YY83	A0A0A6YY83	>tr|A0A0A6YY83|A0A0A6YY83_MOUSE Protocadherin 7 OS=Mus musculus (Mouse) OX=10090 GN=Pcdh7 PE=1 SV=1	PCDH7	16	10	-0.22453	0.00284646	0.00749549	FALSE	124	105	0.172807
P26883	P26883	>sp|P26883|FKB1A_MOUSE Peptidyl-prolyl cis-trans isomerase FKBP1A OS=Mus musculus (Mouse) OX=10090 GN=Fkbp1a PE=1 SV=2	FKBP1A	3	2	-0.989365	6.9904e-09	1.25318e-07	TRUE	24	21	0.112913
A6H6J9	A6H6J9	>tr|A6H6J9|A6H6J9_MOUSE ANK_REP_REGION domain-containing protein OS=Mus musculus (Mouse) OX=10090 GN=Ankrd50 PE=1 SV=1	ANKRD50	5	1	0.131899	0.585938	0.674489	FALSE	26	31	-0.545411
P70175;Q811D0;Q91XM9	P70175;Q811D0;Q91XM9	>sp|P70175|DLG3_MOUSE Disks large homolog 3 OS=Mus musculus (Mouse) OX=10090 GN=Dlg3 PE=1 SV=1;>sp|Q811D0|DLG1_MOUSE Disks large homolog 1 OS=Mus musculus (Mouse) OX=10090 GN=Dlg1 PE=1 SV=1;>sp|Q91XM9|DLG2_MOUSE Disks large homolog 2 OS=Mus musculus (Mouse) OX=10090 GN=Dlg2 PE=1 SV=2	DLG3;DLG1;DLG2	1	1	-0.745611	6.62455e-07	5.51774e-06	TRUE	10	8	0.266117
Q91V64	Q91V64	>sp|Q91V64|ISOC1_MOUSE Isochorismatase domain-containing protein 1 OS=Mus musculus (Mouse) OX=10090 GN=Isoc1 PE=1 SV=1	ISOC1	9	5	0.0345048	0.599321	0.685263	FALSE	65	60	0.00836671
Q9QUP5	Q9QUP5	>sp|Q9QUP5|HPLN1_MOUSE Hyaluronan and proteoglycan link protein 1 OS=Mus musculus (Mouse) OX=10090 GN=Hapln1 PE=1 SV=1	HAPLN1	14	12	-1.29556	1.50593e-14	9.059e-12	TRUE	127	106	0.212905
Q8BH66	Q8BH66	>sp|Q8BH66|ATLA1_MOUSE Atlastin-1 OS=Mus musculus (Mouse) OX=10090 GN=Atl1 PE=1 SV=1	ATL1	17	10	-1.11211	2.98563e-13	7.82995e-11	TRUE	109	114	-0.245515
Q8BH69	Q8BH69	>sp|Q8BH69|SPS1_MOUSE Selenide, water dikinase 1 OS=Mus musculus (Mouse) OX=10090 GN=Sephs1 PE=1 SV=1	SEPHS1	7	4	-0.0488985	0.632291	0.713766	FALSE	59	50	0.176808
Q62108	Q62108	>sp|Q62108|DLG4_MOUSE Disks large homolog 4 OS=Mus musculus (Mouse) OX=10090 GN=Dlg4 PE=1 SV=1	DLG4	22	5	-1.59842	5.8948e-12	5.31365e-10	TRUE	107	161	-1.0127
Q9CPX6	Q9CPX6	>sp|Q9CPX6|ATG3_MOUSE Ubiquitin-like-conjugating enzyme ATG3 OS=Mus musculus (Mouse) OX=10090 GN=Atg3 PE=1 SV=1	ATG3	8	5	0.135185	0.0688814	0.118766	FALSE	69	55	0.308636
P26039	P26039	>sp|P26039|TLN1_MOUSE Talin-1 OS=Mus musculus (Mouse) OX=10090 GN=Tln1 PE=1 SV=2	TLN1	8	1	0.593322	0.0779092	0.131402	FALSE	40	32	0.269989
Q6PEB6	Q6PEB6	>sp|Q6PEB6|PHOCN_MOUSE MOB-like protein phocein OS=Mus musculus (Mouse) OX=10090 GN=Mob4 PE=1 SV=1	MOB4	3	2	-0.421405	0.000364407	0.00124395	TRUE	25	23	-0.00797115
P70335;P70336	P70335;P70336	>sp|P70335|ROCK1_MOUSE Rho-associated protein kinase 1 OS=Mus musculus (Mouse) OX=10090 GN=Rock1 PE=1 SV=1;>sp|P70336|ROCK2_MOUSE Rho-associated protein kinase 2 OS=Mus musculus (Mouse) OX=10090 GN=Rock2 PE=1 SV=1	ROCK1;ROCK2	2	2	0.0897099	0.447988	0.550978	FALSE	20	16	0.286542
Q8BR63	Q8BR63	>sp|Q8BR63|F177A_MOUSE Protein FAM177A1 OS=Mus musculus (Mouse) OX=10090 GN=Fam177a1 PE=1 SV=1	FAM177A1	4	1	-0.0978892	0.432297	0.536407	FALSE	27	27	-0.155476
Q9QYB8;Q9QYC0	Q9QYB8;Q9QYC0	>sp|Q9QYB8|ADDB_MOUSE Beta-adducin OS=Mus musculus (Mouse) OX=10090 GN=Add2 PE=1 SV=4;>sp|Q9QYC0|ADDA_MOUSE Alpha-adducin OS=Mus musculus (Mouse) OX=10090 GN=Add1 PE=1 SV=2	ADD2;ADD1	2	1	-0.170269	0.0850591	0.141391	FALSE	13	12	0.00632233
Q5SVL6	Q5SVL6	>sp|Q5SVL6|RPGP2_MOUSE Rap1 GTPase-activating protein 2 OS=Mus musculus (Mouse) OX=10090 GN=Rap1gap2 PE=1 SV=1	RAP1GAP2	6	4	-0.163519	0.20187	0.292382	FALSE	47	37	0.331006
P26339	P26339	>sp|P26339|CMGA_MOUSE Chromogranin-A OS=Mus musculus (Mouse) OX=10090 GN=Chga PE=1 SV=1	CHGA	2	0					2	7	-2.18278
P59108;Q0VE82;Q1RLL3;Q8BLR2;Q8BT60;Q8JZW4;Q9DC53;Q9Z140	P59108;Q0VE82;Q1RLL3;Q8BLR2;Q8BT60;Q8JZW4;Q9DC53;Q9Z140	>sp|P59108|CPNE2_MOUSE Copine-2 OS=Mus musculus (Mouse) OX=10090 GN=Cpne2 PE=1 SV=1;>sp|Q0VE82|CPNE7_MOUSE Copine-7 OS=Mus musculus (Mouse) OX=10090 GN=Cpne7 PE=1 SV=1;>sp|Q1RLL3|CPNE9_MOUSE Copine-9 OS=Mus musculus (Mouse) OX=10090 GN=Cpne9 PE=1 SV=1;>sp|Q8BLR2|CPNE4_MOUSE Copine-4 OS=Mus musculus (Mouse) OX=10090 GN=Cpne4 PE=1 SV=1;>sp|Q8BT60|CPNE3_MOUSE Copine-3 OS=Mus musculus (Mouse) OX=1009…	CPNE2;CPNE7;CPNE9;CPNE4;CPNE3;CPNE5;CPNE8;CPNE6	1	1	-0.350795	0.0226102	0.0463154	FALSE	10	8	0.266117
Q60823	Q60823	>sp|Q60823|AKT2_MOUSE RAC-beta serine/threonine-protein kinase OS=Mus musculus (Mouse) OX=10090 GN=Akt2 PE=1 SV=1	AKT2	13	4	-1.04889	2.25274e-09	5.12452e-08	TRUE	55	80	-0.927797
Q6P9N1;Q8C729	Q6P9N1;Q8C729	>sp|Q6P9N1|HYCCI_MOUSE Hyccin OS=Mus musculus (Mouse) OX=10090 GN=Fam126a PE=1 SV=3;>sp|Q8C729|F126B_MOUSE Protein FAM126B OS=Mus musculus (Mouse) OX=10090 GN=Fam126b PE=1 SV=1	FAM126A;FAM126B	1	0					7	8	-0.446515
P62484;Q8CBW3	P62484;Q8CBW3	>sp|P62484|ABI2_MOUSE Abl interactor 2 OS=Mus musculus (Mouse) OX=10090 GN=Abi2 PE=1 SV=1;>sp|Q8CBW3|ABI1_MOUSE Abl interactor 1 OS=Mus musculus (Mouse) OX=10090 GN=Abi1 PE=1 SV=3	ABI2;ABI1	6	4	-0.536523	1.33571e-05	7.14579e-05	TRUE	51	41	0.284929
Q8R5L3	Q8R5L3	>sp|Q8R5L3|VPS39_MOUSE Vam6/Vps39-like protein OS=Mus musculus (Mouse) OX=10090 GN=Vps39 PE=1 SV=1	VPS39	12	4	-0.366589	0.000224634	0.000819522	TRUE	73	74	-0.195803
Q8K097	Q8K097	>sp|Q8K097|LFG2_MOUSE Protein lifeguard 2 OS=Mus musculus (Mouse) OX=10090 GN=Faim2 PE=2 SV=1	FAIM2	2	2	0.212273	0.200323	0.290305	FALSE	18	15	0.208113
Q61361	Q61361	>sp|Q61361|PGCB_MOUSE Brevican core protein OS=Mus musculus (Mouse) OX=10090 GN=Bcan PE=1 SV=2	BCAN	5	0					20	37	-1.43846
Q9CPW4	Q9CPW4	>sp|Q9CPW4|ARPC5_MOUSE Actin-related protein 2/3 complex subunit 5 OS=Mus musculus (Mouse) OX=10090 GN=Arpc5 PE=1 SV=3	ARPC5	4	3	-0.909069	7.30557e-10	2.00773e-08	TRUE	33	30	0.0451105
P00397	P00397	>sp|P00397|COX1_MOUSE Cytochrome c oxidase subunit 1 OS=Mus musculus (Mouse) OX=10090 GN=Mtco1 PE=1 SV=2	MTCO1	4	3	-0.451504	0.00454079	0.0113081	FALSE	29	27	-0.0140393
P11531	P11531	>sp|P11531|DMD_MOUSE Dystrophin OS=Mus musculus (Mouse) OX=10090 GN=Dmd PE=1 SV=3	DMD	11	0					15	60	-2.97225
P40124;Q9CYT6	P40124;Q9CYT6	>sp|P40124|CAP1_MOUSE Adenylyl cyclase-associated protein 1 OS=Mus musculus (Mouse) OX=10090 GN=Cap1 PE=1 SV=4;>sp|Q9CYT6|CAP2_MOUSE Adenylyl cyclase-associated protein 2 OS=Mus musculus (Mouse) OX=10090 GN=Cap2 PE=1 SV=1	CAP1;CAP2	1	1	-0.643293	2.69863e-05	0.000132101	TRUE	10	8	0.266117
Q6ZWV7	Q6ZWV7	>sp|Q6ZWV7|RL35_MOUSE 60S ribosomal protein L35 OS=Mus musculus (Mouse) OX=10090 GN=Rpl35 PE=1 SV=1	RPL35	2	2	1.06644	9.16629e-05	0.000376527	TRUE	20	16	0.286542
Q99JY0	Q99JY0	>sp|Q99JY0|ECHB_MOUSE Trifunctional enzyme subunit beta, mitochondrial OS=Mus musculus (Mouse) OX=10090 GN=Hadhb PE=1 SV=1	HADHB	21	13	-0.62846	5.27554e-10	1.59563e-08	TRUE	155	143	0.012602
Q99JP6;Q9QWW1;Q9Z2Y3	Q99JP6;Q9QWW1;Q9Z2Y3	>sp|Q99JP6|HOME3_MOUSE Homer protein homolog 3 OS=Mus musculus (Mouse) OX=10090 GN=Homer3 PE=1 SV=2;>sp|Q9QWW1|HOME2_MOUSE Homer protein homolog 2 OS=Mus musculus (Mouse) OX=10090 GN=Homer2 PE=1 SV=1;>sp|Q9Z2Y3|HOME1_MOUSE Homer protein homolog 1 OS=Mus musculus (Mouse) OX=10090 GN=Homer1 PE=1 SV=2	HOMER3;HOMER2;HOMER1	1	1	-0.779177	2.92512e-06	1.95272e-05	TRUE	9	8	0.0573934
Q3UGC7;Q66JS6	Q3UGC7;Q66JS6	>sp|Q3UGC7|EI3JA_MOUSE Eukaryotic translation initiation factor 3 subunit J-A OS=Mus musculus (Mouse) OX=10090 GN=Eif3j1 PE=2 SV=1;>sp|Q66JS6|EI3JB_MOUSE Eukaryotic translation initiation factor 3 subunit J-B OS=Mus musculus (Mouse) OX=10090 GN=Eif3j2 PE=1 SV=1	EIF3J1;EIF3J2	7	4	-0.651794	4.20757e-07	3.79095e-06	TRUE	50	43	0.140239
P54227;P55821	P54227;P55821	>sp|P54227|STMN1_MOUSE Stathmin OS=Mus musculus (Mouse) OX=10090 GN=Stmn1 PE=1 SV=2;>sp|P55821|STMN2_MOUSE Stathmin-2 OS=Mus musculus (Mouse) OX=10090 GN=Stmn2 PE=1 SV=1	STMN1;STMN2	3	3	-0.255105	0.059894	0.104907	FALSE	28	24	0.141495
Q8BIF0	Q8BIF0	>sp|Q8BIF0|C99L2_MOUSE CD99 antigen-like protein 2 OS=Mus musculus (Mouse) OX=10090 GN=Cd99l2 PE=1 SV=1	CD99L2	1	1	-0.595403	0.00260739	0.00694706	TRUE	8	8	-0.201324
Q8BYI9	Q8BYI9	>sp|Q8BYI9|TENR_MOUSE Tenascin-R OS=Mus musculus (Mouse) OX=10090 GN=Tnr PE=1 SV=2	TNR	25	14	-1.13461	3.37701e-11	1.88486e-09	TRUE	164	191	-0.478857
O89086	O89086	>sp|O89086|RBM3_MOUSE RNA-binding protein 3 OS=Mus musculus (Mouse) OX=10090 GN=Rbm3 PE=1 SV=1	RBM3	5	2	-1.14566	1.71488e-06	1.23299e-05	TRUE	22	28	-0.64851
Q9QXY6;Q9WVK4	Q9QXY6;Q9WVK4	>sp|Q9QXY6|EHD3_MOUSE EH domain-containing protein 3 OS=Mus musculus (Mouse) OX=10090 GN=Ehd3 PE=1 SV=2;>sp|Q9WVK4|EHD1_MOUSE EH domain-containing protein 1 OS=Mus musculus (Mouse) OX=10090 GN=Ehd1 PE=1 SV=1	EHD3;EHD1	11	8	-0.100323	0.0814931	0.136511	FALSE	92	74	0.291517
Q9Z2I2	Q9Z2I2	>sp|Q9Z2I2|FKB1B_MOUSE Peptidyl-prolyl cis-trans isomerase FKBP1B OS=Mus musculus (Mouse) OX=10090 GN=Fkbp1b PE=1 SV=3	FKBP1B	2	2	-0.565257	0.000918898	0.00279983	TRUE	20	15	0.415872
Q8BW22	Q8BW22	>sp|Q8BW22|CREST_MOUSE Calcium-responsive transactivator OS=Mus musculus (Mouse) OX=10090 GN=Ss18l1 PE=1 SV=1	SS18L1	1	1	-0.640382	0.00272708	0.00723036	TRUE	8	8	-0.148891
P04925	P04925	>sp|P04925|PRIO_MOUSE Major prion protein OS=Mus musculus (Mouse) OX=10090 GN=Prnp PE=1 SV=2	PRNP	5	4	0.284256	0.0472263	0.0856846	FALSE	47	37	0.330745
Q8CFI0	Q8CFI0	>sp|Q8CFI0|NED4L_MOUSE E3 ubiquitin-protein ligase NEDD4-like OS=Mus musculus (Mouse) OX=10090 GN=Nedd4l PE=1 SV=2	NEDD4L	19	12	-0.49571	7.21338e-09	1.27625e-07	TRUE	154	136	0.096439
Q80U49	Q80U49	>sp|Q80U49|C170B_MOUSE Centrosomal protein of 170 kDa protein B OS=Mus musculus (Mouse) OX=10090 GN=Cep170b PE=1 SV=2	CEP170B	6	0					17	29	-1.28974
Q9WV92;Q9Z2H5	Q9WV92;Q9Z2H5	>sp|Q9WV92|E41L3_MOUSE Band 4.1-like protein 3 OS=Mus musculus (Mouse) OX=10090 GN=Epb41l3 PE=1 SV=1;>sp|Q9Z2H5|E41L1_MOUSE Band 4.1-like protein 1 OS=Mus musculus (Mouse) OX=10090 GN=Epb41l1 PE=1 SV=2	EPB41L3;EPB41L1	1	0					7	6	0.0911595
O35681	O35681	>sp|O35681|SYT3_MOUSE Synaptotagmin-3 OS=Mus musculus (Mouse) OX=10090 GN=Syt3 PE=1 SV=2	SYT3	3	2	0.0842815	0.362055	0.46604	FALSE	29	20	0.587826
Q01721	Q01721	>sp|Q01721|GAS1_MOUSE Growth arrest-specific protein 1 OS=Mus musculus (Mouse) OX=10090 GN=Gas1 PE=2 SV=2	GAS1	4	1	-1.46572	2.03985e-07	2.05657e-06	TRUE	15	22	-0.947698
Q9DAM5	Q9DAM5	>sp|Q9DAM5|TPC_MOUSE Mitochondrial thiamine pyrophosphate carrier OS=Mus musculus (Mouse) OX=10090 GN=Slc25a19 PE=1 SV=1	SLC25A19	1	0					5	8	-1.0476
Q61411	Q61411	>sp|Q61411|RASH_MOUSE GTPase HRas OS=Mus musculus (Mouse) OX=10090 GN=Hras PE=1 SV=2	HRAS	2	2	-0.282943	0.0277253	0.0548428	FALSE	20	16	0.286542
P08551;P08553;P46660	P08551;P08553;P46660	>sp|P08551|NFL_MOUSE Neurofilament light polypeptide OS=Mus musculus (Mouse) OX=10090 GN=Nefl PE=1 SV=5;>sp|P08553|NFM_MOUSE Neurofilament medium polypeptide OS=Mus musculus (Mouse) OX=10090 GN=Nefm PE=1 SV=4;>sp|P46660|AINX_MOUSE Alpha-internexin OS=Mus musculus (Mouse) OX=10090 GN=Ina PE=1 SV=3	NEFL;NEFM;INA	2	1	-2.71936	3.54483e-12	3.7057e-10	TRUE	16	14	0.110611
Q9Z0H8	Q9Z0H8	>sp|Q9Z0H8|CLIP2_MOUSE CAP-Gly domain-containing linker protein 2 OS=Mus musculus (Mouse) OX=10090 GN=Clip2 PE=1 SV=2	CLIP2	29	13	-0.848733	1.16014e-11	8.43174e-10	TRUE	208	216	-0.233304
F6SEU4	F6SEU4	>sp|F6SEU4|SYGP1_MOUSE Ras/Rap GTPase-activating protein SynGAP OS=Mus musculus (Mouse) OX=10090 GN=Syngap1 PE=1 SV=2	SYNGAP1	28	15	-0.64724	2.1224e-07	2.12005e-06	TRUE	188	206	-0.350141
Q4QQM4	Q4QQM4	>sp|Q4QQM4|P5I11_MOUSE Tumor protein p53-inducible protein 11 OS=Mus musculus (Mouse) OX=10090 GN=Trp53i11 PE=1 SV=1	TRP53I11	2	1	-0.654025	0.00136358	0.00392892	TRUE	14	14	-0.138094
Q9JME7	Q9JME7	>sp|Q9JME7|TPC2L_MOUSE Trafficking protein particle complex subunit 2-like protein OS=Mus musculus (Mouse) OX=10090 GN=Trappc2l PE=1 SV=1	TRAPPC2L	5	4	-0.195692	0.0109594	0.0248157	FALSE	42	31	0.466132
A2RT62	A2RT62	>sp|A2RT62|FXL16_MOUSE F-box/LRR-repeat protein 16 OS=Mus musculus (Mouse) OX=10090 GN=Fbxl16 PE=1 SV=1	FBXL16	7	2	-1.33415	2.00408e-11	1.26164e-09	TRUE	47	54	-0.441148
P26039;Q71LX4	P26039;Q71LX4	>sp|P26039|TLN1_MOUSE Talin-1 OS=Mus musculus (Mouse) OX=10090 GN=Tln1 PE=1 SV=2;>sp|Q71LX4|TLN2_MOUSE Talin-2 OS=Mus musculus (Mouse) OX=10090 GN=Tln2 PE=1 SV=3	TLN1;TLN2	6	1	0.0542618	0.897119	0.926025	FALSE	41	24	0.911423
A2AP18	A2AP18	>sp|A2AP18|PLCH2_MOUSE 1-phosphatidylinositol 4,5-bisphosphate phosphodiesterase eta-2 OS=Mus musculus (Mouse) OX=10090 GN=Plch2 PE=1 SV=2	PLCH2	12	9	-0.0835076	0.231562	0.326394	FALSE	103	86	0.211146
Q8C5L3	Q8C5L3	>sp|Q8C5L3|CNOT2_MOUSE CCR4-NOT transcription complex subunit 2 OS=Mus musculus (Mouse) OX=10090 GN=Cnot2 PE=1 SV=2	CNOT2	2	1	-0.467708	0.00338078	0.00871598	TRUE	11	11	-0.164298
O55137;Q9QYR9	O55137;Q9QYR9	>sp|O55137|ACOT1_MOUSE Acyl-coenzyme A thioesterase 1 OS=Mus musculus (Mouse) OX=10090 GN=Acot1 PE=1 SV=1;>sp|Q9QYR9|ACOT2_MOUSE Acyl-coenzyme A thioesterase 2, mitochondrial OS=Mus musculus (Mouse) OX=10090 GN=Acot2 PE=1 SV=2	ACOT1;ACOT2	9	6	-0.306414	0.00201612	0.00554356	TRUE	75	61	0.259144
O88910	O88910	>sp|O88910|MPP3_MOUSE MAGUK p55 subfamily member 3 OS=Mus musculus (Mouse) OX=10090 GN=Mpp3 PE=1 SV=2	MPP3	11	5	-0.661153	7.08861e-06	4.19429e-05	TRUE	71	79	-0.383135
P42125	P42125	>sp|P42125|ECI1_MOUSE Enoyl-CoA delta isomerase 1, mitochondrial OS=Mus musculus (Mouse) OX=10090 GN=Eci1 PE=1 SV=2	ECI1	9	5	-0.472299	9.6034e-05	0.000392398	TRUE	63	62	-0.127924
Q6DFZ1	Q6DFZ1	>tr|Q6DFZ1|Q6DFZ1_MOUSE SEC7 domain-containing protein OS=Mus musculus (Mouse) OX=10090 GN=Gbf1 PE=1 SV=1	GBF1	14	1	-0.0636333	0.779124	0.832645	FALSE	108	52	1.34636
P23591	P23591	>sp|P23591|FCL_MOUSE GDP-L-fucose synthase OS=Mus musculus (Mouse) OX=10090 GN=Tsta3 PE=1 SV=3	TSTA3	8	7	0.101215	0.11154	0.178031	FALSE	75	57	0.412356
P56394	P56394	>sp|P56394|COX17_MOUSE Cytochrome c oxidase copper chaperone OS=Mus musculus (Mouse) OX=10090 GN=Cox17 PE=1 SV=2	COX17	1	1	-0.474627	0.0458277	0.0835109	FALSE	8	7	0.0804113
Q9DBL1	Q9DBL1	>sp|Q9DBL1|ACDSB_MOUSE Short/branched chain specific acyl-CoA dehydrogenase, mitochondrial OS=Mus musculus (Mouse) OX=10090 GN=Acadsb PE=1 SV=1	ACADSB	10	7	0.334755	8.41384e-06	4.8306e-05	TRUE	87	68	0.34397
P60469;Q8BSS9	P60469;Q8BSS9	>sp|P60469|LIPA3_MOUSE Liprin-alpha-3 OS=Mus musculus (Mouse) OX=10090 GN=Ppfia3 PE=1 SV=2;>sp|Q8BSS9|LIPA2_MOUSE Liprin-alpha-2 OS=Mus musculus (Mouse) OX=10090 GN=Ppfia2 PE=1 SV=2	PPFIA3;PPFIA2	1	1	-0.145196	0.159321	0.240537	FALSE	10	8	0.266117
Q8R317;Q99NB8;Q9QZM0	Q8R317;Q99NB8;Q9QZM0	>sp|Q8R317|UBQL1_MOUSE Ubiquilin-1 OS=Mus musculus (Mouse) OX=10090 GN=Ubqln1 PE=1 SV=1;>sp|Q99NB8|UBQL4_MOUSE Ubiquilin-4 OS=Mus musculus (Mouse) OX=10090 GN=Ubqln4 PE=1 SV=1;>sp|Q9QZM0|UBQL2_MOUSE Ubiquilin-2 OS=Mus musculus (Mouse) OX=10090 GN=Ubqln2 PE=1 SV=2	UBQLN1;UBQLN4;UBQLN2	1	1	-0.506065	0.000684169	0.0021674	TRUE	9	8	0.0573934
Q6RHR9	Q6RHR9	>sp|Q6RHR9|MAGI1_MOUSE Membrane-associated guanylate kinase, WW and PDZ domain-containing protein 1 OS=Mus musculus (Mouse) OX=10090 GN=Magi1 PE=1 SV=1	MAGI1	15	5	-0.657494	5.06115e-06	3.13514e-05	TRUE	77	99	-0.681694
Q9JIS5	Q9JIS5	>sp|Q9JIS5|SV2A_MOUSE Synaptic vesicle glycoprotein 2A OS=Mus musculus (Mouse) OX=10090 GN=Sv2a PE=1 SV=1	SV2A	17	10	-0.668803	1.13209e-10	4.61926e-09	TRUE	121	113	-0.00816053
Q9DBR3	Q9DBR3	>sp|Q9DBR3|ARMC8_MOUSE Armadillo repeat-containing protein 8 OS=Mus musculus (Mouse) OX=10090 GN=Armc8 PE=1 SV=2	ARMC8	12	9	-0.160683	0.0356924	0.0681378	FALSE	106	86	0.268913
Q8CE50	Q8CE50	>sp|Q8CE50|SNX30_MOUSE Sorting nexin-30 OS=Mus musculus (Mouse) OX=10090 GN=Snx30 PE=1 SV=1	SNX30	15	11	0.381629	2.66236e-06	1.78834e-05	TRUE	130	105	0.281592
P21237	P21237	>sp|P21237|BDNF_MOUSE Brain-derived neurotrophic factor OS=Mus musculus (Mouse) OX=10090 GN=Bdnf PE=1 SV=1	BDNF	4	2	0.00151378	0.990381	0.992217	FALSE	30	24	0.307283
P57716	P57716	>sp|P57716|NICA_MOUSE Nicastrin OS=Mus musculus (Mouse) OX=10090 GN=Ncstn PE=1 SV=3	NCSTN	9	6	-0.140758	0.0263665	0.0526357	FALSE	66	56	0.18508
Q80VP1;Q91W69	Q80VP1;Q91W69	>sp|Q80VP1|EPN1_MOUSE Epsin-1 OS=Mus musculus (Mouse) OX=10090 GN=Epn1 PE=1 SV=3;>sp|Q91W69|EPN3_MOUSE Epsin-3 OS=Mus musculus (Mouse) OX=10090 GN=Epn3 PE=1 SV=1	EPN1;EPN3	1	1	-0.247631	0.136742	0.211762	FALSE	10	8	0.266117
P16054	P16054	>sp|P16054|KPCE_MOUSE Protein kinase C epsilon type OS=Mus musculus (Mouse) OX=10090 GN=Prkce PE=1 SV=1	PRKCE	22	15	0.0507179	0.535223	0.630208	FALSE	179	152	0.176985
Q60738	Q60738	>sp|Q60738|ZNT1_MOUSE Zinc transporter 1 OS=Mus musculus (Mouse) OX=10090 GN=Slc30a1 PE=1 SV=1	SLC30A1	5	4	0.353929	0.0109429	0.0247886	FALSE	46	35	0.393624
Q9WV69	Q9WV69	>sp|Q9WV69|DEMA_MOUSE Dematin OS=Mus musculus (Mouse) OX=10090 GN=Dmtn PE=1 SV=1	DMTN	10	1	-2.17416	2.42195e-12	2.92275e-10	TRUE	23	76	-2.60382
Q8CIQ7	Q8CIQ7	>sp|Q8CIQ7|DOCK3_MOUSE Dedicator of cytokinesis protein 3 OS=Mus musculus (Mouse) OX=10090 GN=Dock3 PE=1 SV=1	DOCK3	11	2	-0.122504	0.567197	0.6577	FALSE	74	51	0.60423
Q60625	Q60625	>sp|Q60625|ICAM5_MOUSE Intercellular adhesion molecule 5 OS=Mus musculus (Mouse) OX=10090 GN=Icam5 PE=1 SV=2	ICAM5	6	3	-0.368068	0.0121507	0.0271499	FALSE	44	45	-0.20899
Q8C0P5	Q8C0P5	>sp|Q8C0P5|COR2A_MOUSE Coronin-2A OS=Mus musculus (Mouse) OX=10090 GN=Coro2a PE=2 SV=1	CORO2A	4	2	0.365702	0.00830006	0.0194278	FALSE	36	21	0.905969
Q80Y24	Q80Y24	>sp|Q80Y24|PRIC2_MOUSE Prickle-like protein 2 OS=Mus musculus (Mouse) OX=10090 GN=Prickle2 PE=1 SV=3	PRICKLE2	5	2	-0.421218	0.0106308	0.0241726	FALSE	35	29	0.241801
Q6P9K8	Q6P9K8	>sp|Q6P9K8|CSKI1_MOUSE Caskin-1 OS=Mus musculus (Mouse) OX=10090 GN=Caskin1 PE=1 SV=2	CASKIN1	28	6	-1.06712	1.52714e-08	2.36904e-07	TRUE	124	197	-1.10617
Q8BL65	Q8BL65	>sp|Q8BL65|ABLM2_MOUSE Actin-binding LIM protein 2 OS=Mus musculus (Mouse) OX=10090 GN=Ablim2 PE=1 SV=1	ABLIM2	4	3	-0.682337	8.63891e-08	1.00583e-06	TRUE	34	32	-0.0446333
P10852	P10852	>sp|P10852|4F2_MOUSE 4F2 cell-surface antigen heavy chain OS=Mus musculus (Mouse) OX=10090 GN=Slc3a2 PE=1 SV=1	SLC3A2	20	17	-0.183049	0.00243043	0.00653669	FALSE	182	151	0.233194
O09118	O09118	>sp|O09118|NET1_MOUSE Netrin-1 OS=Mus musculus (Mouse) OX=10090 GN=Ntn1 PE=1 SV=3	NTN1	5	1	0.97395	0.00112919	0.00334799	TRUE	30	23	0.354529
Q9CYR6	Q9CYR6	>sp|Q9CYR6|AGM1_MOUSE Phosphoacetylglucosamine mutase OS=Mus musculus (Mouse) OX=10090 GN=Pgm3 PE=1 SV=1	PGM3	11	6	-0.29521	0.00119356	0.00350431	TRUE	80	75	-0.031896
Q9R0N7	Q9R0N7	>sp|Q9R0N7|SYT7_MOUSE Synaptotagmin-7 OS=Mus musculus (Mouse) OX=10090 GN=Syt7 PE=1 SV=1	SYT7	11	6	-0.561912	9.3921e-07	7.38009e-06	TRUE	72	67	-0.00691127
Q62422	Q62422	>sp|Q62422|OSTF1_MOUSE Osteoclast-stimulating factor 1 OS=Mus musculus (Mouse) OX=10090 GN=Ostf1 PE=1 SV=2	OSTF1	5	4	0.586966	1.04065e-05	5.76084e-05	TRUE	46	33	0.52605
Q9Z2H2	Q9Z2H2	>sp|Q9Z2H2|RGS6_MOUSE Regulator of G-protein signaling 6 OS=Mus musculus (Mouse) OX=10090 GN=Rgs6 PE=1 SV=2	RGS6	6	4	0.385438	0.00256459	0.00685039	TRUE	49	34	0.572067
Q69ZS6;Q8BG39	Q69ZS6;Q8BG39	>sp|Q69ZS6|SV2C_MOUSE Synaptic vesicle glycoprotein 2C OS=Mus musculus (Mouse) OX=10090 GN=Sv2c PE=1 SV=2;>sp|Q8BG39|SV2B_MOUSE Synaptic vesicle glycoprotein 2B OS=Mus musculus (Mouse) OX=10090 GN=Sv2b PE=1 SV=1	SV2C;SV2B	1	1	-1.00056	0.000105837	0.000427615	TRUE	10	8	0.266117
Q8C863;Q8CFI0	Q8C863;Q8CFI0	>sp|Q8C863|ITCH_MOUSE E3 ubiquitin-protein ligase Itchy OS=Mus musculus (Mouse) OX=10090 GN=Itch PE=1 SV=2;>sp|Q8CFI0|NED4L_MOUSE E3 ubiquitin-protein ligase NEDD4-like OS=Mus musculus (Mouse) OX=10090 GN=Nedd4l PE=1 SV=2	ITCH;NEDD4L	1	1	-0.493614	0.000156651	0.00059937	TRUE	8	7	0.0993207
P56371;Q91ZR1	P56371;Q91ZR1	>sp|P56371|RAB4A_MOUSE Ras-related protein Rab-4A OS=Mus musculus (Mouse) OX=10090 GN=Rab4a PE=1 SV=2;>sp|Q91ZR1|RAB4B_MOUSE Ras-related protein Rab-4B OS=Mus musculus (Mouse) OX=10090 GN=Rab4b PE=1 SV=2	RAB4A;RAB4B	2	2	0.269228	0.0152779	0.0330858	FALSE	20	16	0.286542
Q80X80	Q80X80	>sp|Q80X80|C2C2L_MOUSE Phospholipid transfer protein C2CD2L OS=Mus musculus (Mouse) OX=10090 GN=C2cd2l PE=1 SV=3	C2CD2L	12	10	-0.252326	0.00362814	0.0092762	FALSE	106	87	0.248521
O35927	O35927	>sp|O35927|CTND2_MOUSE Catenin delta-2 OS=Mus musculus (Mouse) OX=10090 GN=Ctnnd2 PE=1 SV=1	CTNND2	27	10	-1.03844	8.93439e-10	2.39459e-08	TRUE	154	187	-0.554799
Q6NVE8	Q6NVE8	>sp|Q6NVE8|WDR44_MOUSE WD repeat-containing protein 44 OS=Mus musculus (Mouse) OX=10090 GN=Wdr44 PE=1 SV=1	WDR44	18	11	0.0496154	0.386951	0.492004	FALSE	139	108	0.361645
P70158	P70158	>sp|P70158|ASM3A_MOUSE Acid sphingomyelinase-like phosphodiesterase 3a OS=Mus musculus (Mouse) OX=10090 GN=Smpdl3a PE=1 SV=2	SMPDL3A	5	0					11	26	-1.90175
Q9WV68	Q9WV68	>sp|Q9WV68|DECR2_MOUSE Peroxisomal 2,4-dienoyl-CoA reductase OS=Mus musculus (Mouse) OX=10090 GN=Decr2 PE=1 SV=1	DECR2	2	1	-0.0850108	0.424926	0.529141	FALSE	17	15	0.0803879
Q68ED7	Q68ED7	>sp|Q68ED7|CRTC1_MOUSE CREB-regulated transcription coactivator 1 OS=Mus musculus (Mouse) OX=10090 GN=Crtc1 PE=1 SV=1	CRTC1	5	0					13	34	-2.07632
P40124	P40124	>sp|P40124|CAP1_MOUSE Adenylyl cyclase-associated protein 1 OS=Mus musculus (Mouse) OX=10090 GN=Cap1 PE=1 SV=4	CAP1	15	8	-0.477649	8.38391e-06	4.81852e-05	TRUE	107	93	0.131357
Q61831	Q61831	>sp|Q61831|MK10_MOUSE Mitogen-activated protein kinase 10 OS=Mus musculus (Mouse) OX=10090 GN=Mapk10 PE=1 SV=2	MAPK10	2	2	-0.567083	3.87292e-06	2.49322e-05	TRUE	18	14	0.328262
P80560	P80560	>sp|P80560|PTPR2_MOUSE Receptor-type tyrosine-protein phosphatase N2 OS=Mus musculus (Mouse) OX=10090 GN=Ptprn2 PE=1 SV=2	PTPRN2	20	14	0.0305312	0.652071	0.730671	FALSE	157	134	0.164061
Q91X97	Q91X97	>sp|Q91X97|NCALD_MOUSE Neurocalcin-delta OS=Mus musculus (Mouse) OX=10090 GN=Ncald PE=1 SV=4	NCALD	6	3	-0.511255	0.000115289	0.000461328	TRUE	44	41	-0.0179369
Q9Z1G3	Q9Z1G3	>sp|Q9Z1G3|VATC1_MOUSE V-type proton ATPase subunit C 1 OS=Mus musculus (Mouse) OX=10090 GN=Atp6v1c1 PE=1 SV=4	ATP6V1C1	29	21	-0.106062	0.0846152	0.140826	FALSE	235	205	0.128499
Q9CQC8	Q9CQC8	>sp|Q9CQC8|SPG21_MOUSE Maspardin OS=Mus musculus (Mouse) OX=10090 GN=Spg21 PE=1 SV=1	SPG21	6	2	-0.514663	9.69317e-05	0.00039547	TRUE	31	39	-0.626982
P32037	P32037	>sp|P32037|GTR3_MOUSE Solute carrier family 2, facilitated glucose transporter member 3 OS=Mus musculus (Mouse) OX=10090 GN=Slc2a3 PE=1 SV=1	SLC2A3	7	7	-0.411347	3.82706e-05	0.000177947	TRUE	70	56	0.302425
Q8K009;Q8R0Y6	Q8K009;Q8R0Y6	>sp|Q8K009|AL1L2_MOUSE Mitochondrial 10-formyltetrahydrofolate dehydrogenase OS=Mus musculus (Mouse) OX=10090 GN=Aldh1l2 PE=1 SV=2;>sp|Q8R0Y6|AL1L1_MOUSE Cytosolic 10-formyltetrahydrofolate dehydrogenase OS=Mus musculus (Mouse) OX=10090 GN=Aldh1l1 PE=1 SV=1	ALDH1L2;ALDH1L1	4	3	-0.892461	3.49559e-09	7.23312e-08	TRUE	29	25	0.152953
Q9CZP0	Q9CZP0	>sp|Q9CZP0|UFSP1_MOUSE Ufm1-specific protease 1 OS=Mus musculus (Mouse) OX=10090 GN=Ufsp1 PE=1 SV=1	UFSP1	1	1	0.152824	0.345016	0.449235	FALSE	9	8	0.0717842
P07742	P07742	>sp|P07742|RIR1_MOUSE Ribonucleoside-diphosphate reductase large subunit OS=Mus musculus (Mouse) OX=10090 GN=Rrm1 PE=1 SV=2	RRM1	8	2	0.53334	0.00327508	0.00847576	TRUE	51	36	0.539404
Q9CQ10	Q9CQ10	>sp|Q9CQ10|CHMP3_MOUSE Charged multivesicular body protein 3 OS=Mus musculus (Mouse) OX=10090 GN=Chmp3 PE=1 SV=3	CHMP3	3	2	0.0556826	0.59821	0.684427	FALSE	25	23	0.0233648
Q7TSY6	Q7TSY6	>sp|Q7TSY6|CELF4_MOUSE CUGBP Elav-like family member 4 OS=Mus musculus (Mouse) OX=10090 GN=Celf4 PE=1 SV=2	CELF4	3	3	0.256777	0.0299872	0.0585259	FALSE	30	24	0.293811
Q3TLI0	Q3TLI0	>sp|Q3TLI0|TPC10_MOUSE Trafficking protein particle complex subunit 10 OS=Mus musculus (Mouse) OX=10090 GN=Trappc10 PE=1 SV=2	TRAPPC10	14	4	-0.222089	0.0169527	0.0362059	FALSE	77	69	0.0574111
P12382;P47857;Q9WUA3	P12382;P47857;Q9WUA3	>sp|P12382|PFKAL_MOUSE ATP-dependent 6-phosphofructokinase, liver type OS=Mus musculus (Mouse) OX=10090 GN=Pfkl PE=1 SV=4;>sp|P47857|PFKAM_MOUSE ATP-dependent 6-phosphofructokinase, muscle type OS=Mus musculus (Mouse) OX=10090 GN=Pfkm PE=1 SV=3;>sp|Q9WUA3|PFKAP_MOUSE ATP-dependent 6-phosphofructokinase, platelet type OS=Mus musculus (Mouse) OX=10090 GN=Pfkp PE=1 SV=1	PFKL;PFKM;PFKP	3	2	-0.650875	5.42088e-07	4.68803e-06	TRUE	25	22	0.100259
Q91X58	Q91X58	>sp|Q91X58|ZFN2B_MOUSE AN1-type zinc finger protein 2B OS=Mus musculus (Mouse) OX=10090 GN=Zfand2b PE=1 SV=1	ZFAND2B	1	1	0.118582	0.662192	0.738588	FALSE	8	7	0.0635359
P17182;P17183;P21550	P17182;P17183;P21550	>sp|P17182|ENOA_MOUSE Alpha-enolase OS=Mus musculus (Mouse) OX=10090 GN=Eno1 PE=1 SV=3;>sp|P17183|ENOG_MOUSE Gamma-enolase OS=Mus musculus (Mouse) OX=10090 GN=Eno2 PE=1 SV=2;>sp|P21550|ENOB_MOUSE Beta-enolase OS=Mus musculus (Mouse) OX=10090 GN=Eno3 PE=1 SV=3	ENO1;ENO2;ENO3	1	1	-1.09059	6.25663e-09	1.14052e-07	TRUE	10	8	0.266117
Q99L60;Q9Z1G3	Q99L60;Q9Z1G3	>sp|Q99L60|VATC2_MOUSE V-type proton ATPase subunit C 2 OS=Mus musculus (Mouse) OX=10090 GN=Atp6v1c2 PE=1 SV=1;>sp|Q9Z1G3|VATC1_MOUSE V-type proton ATPase subunit C 1 OS=Mus musculus (Mouse) OX=10090 GN=Atp6v1c1 PE=1 SV=4	ATP6V1C2;ATP6V1C1	1	1	-0.176649	0.106934	0.171742	FALSE	10	8	0.266117
Q7TNG5	Q7TNG5	>sp|Q7TNG5|EMAL2_MOUSE Echinoderm microtubule-associated protein-like 2 OS=Mus musculus (Mouse) OX=10090 GN=Eml2 PE=1 SV=1	EML2	10	9	0.250468	0.0308624	0.0600607	FALSE	89	78	0.119302
P17427	P17427	>sp|P17427|AP2A2_MOUSE AP-2 complex subunit alpha-2 OS=Mus musculus (Mouse) OX=10090 GN=Ap2a2 PE=1 SV=2	AP2A2	28	21	-0.109293	0.062414	0.108828	FALSE	228	193	0.189065
O88602	O88602	>sp|O88602|CCG2_MOUSE Voltage-dependent calcium channel gamma-2 subunit OS=Mus musculus (Mouse) OX=10090 GN=Cacng2 PE=1 SV=1	CACNG2	1	0					6	6	-0.0717267
Q8BH04	Q8BH04	>sp|Q8BH04|PCKGM_MOUSE Phosphoenolpyruvate carboxykinase [GTP], mitochondrial OS=Mus musculus (Mouse) OX=10090 GN=Pck2 PE=1 SV=1	PCK2	13	8	-0.263886	0.00220901	0.00600078	TRUE	85	89	-0.262057
Q99M51	Q99M51	>sp|Q99M51|NCK1_MOUSE Cytoplasmic protein NCK1 OS=Mus musculus (Mouse) OX=10090 GN=Nck1 PE=1 SV=1	NCK1	4	2	-0.235492	0.0340313	0.0653121	FALSE	33	22	0.663334
P42208	P42208	>sp|P42208|SEPT2_MOUSE Septin-2 OS=Mus musculus (Mouse) OX=10090 GN=Septin2 PE=1 SV=2	SEPTIN2	12	8	-0.348723	7.46079e-06	4.37056e-05	TRUE	94	79	0.207233
Q9ERB0	Q9ERB0	>sp|Q9ERB0|SNP29_MOUSE Synaptosomal-associated protein 29 OS=Mus musculus (Mouse) OX=10090 GN=Snap29 PE=1 SV=1	SNAP29	9	4	-0.418103	0.00311331	0.00809191	TRUE	62	66	-0.286568
Q99KQ4	Q99KQ4	>sp|Q99KQ4|NAMPT_MOUSE Nicotinamide phosphoribosyltransferase OS=Mus musculus (Mouse) OX=10090 GN=Nampt PE=1 SV=1	NAMPT	18	12	-0.166763	0.0160027	0.03449	FALSE	148	132	0.0730271
Q80VP0	Q80VP0	>sp|Q80VP0|TCPR1_MOUSE Tectonin beta-propeller repeat-containing protein 1 OS=Mus musculus (Mouse) OX=10090 GN=Tecpr1 PE=1 SV=1	TECPR1	10	5	-0.161196	0.0314437	0.0611041	FALSE	73	62	0.155129
P97823	P97823	>sp|P97823|LYPA1_MOUSE Acyl-protein thioesterase 1 OS=Mus musculus (Mouse) OX=10090 GN=Lypla1 PE=1 SV=1	LYPLA1	3	3	-0.338098	0.000113952	0.000456651	TRUE	30	24	0.293811
O09044;P60879	O09044;P60879	>sp|O09044|SNP23_MOUSE Synaptosomal-associated protein 23 OS=Mus musculus (Mouse) OX=10090 GN=Snap23 PE=1 SV=1;>sp|P60879|SNP25_MOUSE Synaptosomal-associated protein 25 OS=Mus musculus (Mouse) OX=10090 GN=Snap25 PE=1 SV=1	SNAP23;SNAP25	2	1	-2.16601	2.10926e-11	1.30791e-09	TRUE	10	13	-0.634708
Q60870	Q60870	>sp|Q60870|REEP5_MOUSE Receptor expression-enhancing protein 5 OS=Mus musculus (Mouse) OX=10090 GN=Reep5 PE=1 SV=1	REEP5	1	1	-1.01946	0.0457909	0.0835002	FALSE	10	8	0.266117
Q9JM52	Q9JM52	>sp|Q9JM52|MINK1_MOUSE Misshapen-like kinase 1 OS=Mus musculus (Mouse) OX=10090 GN=Mink1 PE=1 SV=3	MINK1	18	9	-0.482819	5.9057e-05	0.000256815	TRUE	122	119	-0.104309
P16546	P16546	>sp|P16546|SPTN1_MOUSE Spectrin alpha chain, non-erythrocytic 1 OS=Mus musculus (Mouse) OX=10090 GN=Sptan1 PE=1 SV=4	SPTAN1	127	88	-0.144896	0.585192	0.674091	FALSE	1066	860	0.27847
Q8VI51	Q8VI51	>sp|Q8VI51|SORC3_MOUSE VPS10 domain-containing receptor SorCS3 OS=Mus musculus (Mouse) OX=10090 GN=Sorcs3 PE=1 SV=1	SORCS3	2	0					6	14	-1.75081
H3BJD6	H3BJD6	>tr|H3BJD6|H3BJD6_MOUSE Protein phosphatase 1, regulatory subunit 9A OS=Mus musculus (Mouse) OX=10090 GN=Ppp1r9a PE=1 SV=1	PPP1R9A	9	0					27	55	-1.60644
Q3UHK1	Q3UHK1	>sp|Q3UHK1|MYCT_MOUSE Proton myo-inositol cotransporter OS=Mus musculus (Mouse) OX=10090 GN=Slc2a13 PE=1 SV=2	SLC2A13	11	10	0.0147521	0.843225	0.885068	FALSE	102	79	0.36564
Q91ZR1	Q91ZR1	>sp|Q91ZR1|RAB4B_MOUSE Ras-related protein Rab-4B OS=Mus musculus (Mouse) OX=10090 GN=Rab4b PE=1 SV=2	RAB4B	6	6	0.303592	0.00351831	0.009019	TRUE	59	48	0.268963
Q60854	Q60854	>sp|Q60854|SPB6_MOUSE Serpin B6 OS=Mus musculus (Mouse) OX=10090 GN=Serpinb6 PE=1 SV=1	SERPINB6	8	6	-0.262179	0.00603627	0.0146893	FALSE	66	58	0.105403
Q9D394	Q9D394	>sp|Q9D394|RUFY3_MOUSE Protein RUFY3 OS=Mus musculus (Mouse) OX=10090 GN=Rufy3 PE=1 SV=1	RUFY3	16	13	-0.540622	1.17366e-08	1.89114e-07	TRUE	142	127	0.073089
P58021	P58021	>sp|P58021|TM9S2_MOUSE Transmembrane 9 superfamily member 2 OS=Mus musculus (Mouse) OX=10090 GN=Tm9sf2 PE=1 SV=1	TM9SF2	9	7	0.0619524	0.506347	0.604624	FALSE	80	63	0.338481
Q9WV54	Q9WV54	>sp|Q9WV54|ASAH1_MOUSE Acid ceramidase OS=Mus musculus (Mouse) OX=10090 GN=Asah1 PE=1 SV=1	ASAH1	12	7	-1.02908	2.96396e-10	1.00924e-08	TRUE	79	78	-0.136841
P26040	P26040	>sp|P26040|EZRI_MOUSE Ezrin OS=Mus musculus (Mouse) OX=10090 GN=Ezr PE=1 SV=3	EZR	20	5	-0.675984	6.70413e-06	4.00178e-05	TRUE	94	112	-0.520993
Q6Y7W8	Q6Y7W8	>sp|Q6Y7W8|GGYF2_MOUSE GRB10-interacting GYF protein 2 OS=Mus musculus (Mouse) OX=10090 GN=Gigyf2 PE=1 SV=2	GIGYF2	5	0					19	30	-1.00128
P50396;Q61598	P50396;Q61598	>sp|P50396|GDIA_MOUSE Rab GDP dissociation inhibitor alpha OS=Mus musculus (Mouse) OX=10090 GN=Gdi1 PE=1 SV=3;>sp|Q61598|GDIB_MOUSE Rab GDP dissociation inhibitor beta OS=Mus musculus (Mouse) OX=10090 GN=Gdi2 PE=1 SV=1	GDI1;GDI2	5	5	-0.498211	2.11374e-07	2.11531e-06	TRUE	50	40	0.299806
B1AZP2	B1AZP2	>sp|B1AZP2|DLGP4_MOUSE Disks large-associated protein 4 OS=Mus musculus (Mouse) OX=10090 GN=Dlgap4 PE=1 SV=1	DLGAP4	12	5	-0.563819	1.48282e-06	1.0878e-05	TRUE	76	87	-0.434866
Q8BYK6	Q8BYK6	>sp|Q8BYK6|YTHD3_MOUSE YTH domain-containing family protein 3 OS=Mus musculus (Mouse) OX=10090 GN=Ythdf3 PE=1 SV=2	YTHDF3	5	2	-1.12704	1.05263e-08	1.73664e-07	TRUE	23	35	-0.978679
Q8K3H0	Q8K3H0	>sp|Q8K3H0|DP13A_MOUSE DCC-interacting protein 13-alpha OS=Mus musculus (Mouse) OX=10090 GN=Appl1 PE=1 SV=1	APPL1	17	17	-0.137921	0.0076354	0.0180831	FALSE	169	135	0.308994
Q8BG79	Q8BG79	>sp|Q8BG79|C19L2_MOUSE CWF19-like protein 2 OS=Mus musculus (Mouse) OX=10090 GN=Cwf19l2 PE=1 SV=1	CWF19L2	1	0					7	6	0.0874065
Q14BI2	Q14BI2	>sp|Q14BI2|GRM2_MOUSE Metabotropic glutamate receptor 2 OS=Mus musculus (Mouse) OX=10090 GN=Grm2 PE=1 SV=2	GRM2	5	1	0.955256	4.61198e-08	6.03123e-07	TRUE	45	25	1.05247
O09174	O09174	>sp|O09174|AMACR_MOUSE Alpha-methylacyl-CoA racemase OS=Mus musculus (Mouse) OX=10090 GN=Amacr PE=1 SV=4	AMACR	6	5	0.0116107	0.871317	0.906529	FALSE	54	44	0.270946
Q9R1V4	Q9R1V4	>sp|Q9R1V4|ADA11_MOUSE Disintegrin and metalloproteinase domain-containing protein 11 OS=Mus musculus (Mouse) OX=10090 GN=Adam11 PE=1 SV=2	ADAM11	4	0					2	32	-5.19978
P47911	P47911	>sp|P47911|RL6_MOUSE 60S ribosomal protein L6 OS=Mus musculus (Mouse) OX=10090 GN=Rpl6 PE=1 SV=3	RPL6	12	12	0.568102	2.7739e-05	0.000135175	TRUE	118	93	0.333448
B1AWN6;Q9ER60	B1AWN6;Q9ER60	>sp|B1AWN6|SCN2A_MOUSE Sodium channel protein type 2 subunit alpha OS=Mus musculus (Mouse) OX=10090 GN=Scn2a PE=1 SV=1;>sp|Q9ER60|SCN4A_MOUSE Sodium channel protein type 4 subunit alpha OS=Mus musculus (Mouse) OX=10090 GN=Scn4a PE=1 SV=1	SCN2A;SCN4A	1	1	0.210751	0.304187	0.406072	FALSE	10	8	0.266117
Q810B6	Q810B6	>sp|Q810B6|ANFY1_MOUSE Rabankyrin-5 OS=Mus musculus (Mouse) OX=10090 GN=Ankfy1 PE=1 SV=2	ANKFY1	15	10	0.141165	0.0317055	0.0614365	FALSE	127	100	0.33177
Q80YA9	Q80YA9	>sp|Q80YA9|CNKR2_MOUSE Connector enhancer of kinase suppressor of ras 2 OS=Mus musculus (Mouse) OX=10090 GN=Cnksr2 PE=1 SV=1	CNKSR2	21	8	-0.789219	5.33278e-07	4.61947e-06	TRUE	121	144	-0.514815
Q8C1B7;Q9R1T4	Q8C1B7;Q9R1T4	>sp|Q8C1B7|SEP11_MOUSE Septin-11 OS=Mus musculus (Mouse) OX=10090 GN=Septin11 PE=1 SV=4;>sp|Q9R1T4|SEPT6_MOUSE Septin-6 OS=Mus musculus (Mouse) OX=10090 GN=Septin6 PE=1 SV=4	SEPTIN11;SEPTIN6	8	5	-0.290372	0.000103974	0.00042127	TRUE	66	52	0.333803
O88643	O88643	>sp|O88643|PAK1_MOUSE Serine/threonine-protein kinase PAK 1 OS=Mus musculus (Mouse) OX=10090 GN=Pak1 PE=1 SV=1	PAK1	7	5	-0.591344	8.29535e-07	6.64364e-06	TRUE	53	53	-0.169437
Q08331	Q08331	>sp|Q08331|CALB2_MOUSE Calretinin OS=Mus musculus (Mouse) OX=10090 GN=Calb2 PE=1 SV=3	CALB2	19	12	-1.78413	3.76569e-11	2.05934e-09	TRUE	134	133	-0.141315
Q7TMB8	Q7TMB8	>sp|Q7TMB8|CYFP1_MOUSE Cytoplasmic FMR1-interacting protein 1 OS=Mus musculus (Mouse) OX=10090 GN=Cyfip1 PE=1 SV=1	CYFIP1	18	10	-0.729766	4.16873e-09	8.32823e-08	TRUE	121	120	-0.140667
Q60996	Q60996	>sp|Q60996|2A5G_MOUSE Serine/threonine-protein phosphatase 2A 56 kDa regulatory subunit gamma isoform OS=Mus musculus (Mouse) OX=10090 GN=Ppp2r5c PE=1 SV=2	PPP2R5C	13	8	-0.10715	0.0293646	0.0575598	FALSE	100	89	0.0823556
Q9CXZ1	Q9CXZ1	>sp|Q9CXZ1|NDUS4_MOUSE NADH dehydrogenase [ubiquinone] iron-sulfur protein 4, mitochondrial OS=Mus musculus (Mouse) OX=10090 GN=Ndufs4 PE=1 SV=3	NDUFS4	5	5	-0.309635	0.000395543	0.00134009	TRUE	49	40	0.256731
Q8BHG2	Q8BHG2	>sp|Q8BHG2|CZIB_MOUSE CXXC motif containing zinc binding protein OS=Mus musculus (Mouse) OX=10090 GN=Czib PE=1 SV=1	CZIB	3	2	-0.407523	0.00406343	0.0102514	FALSE	23	20	0.140895
Q3UYK3;Q5SVR0	Q3UYK3;Q5SVR0	>sp|Q3UYK3|TBCD9_MOUSE TBC1 domain family member 9 OS=Mus musculus (Mouse) OX=10090 GN=Tbc1d9 PE=2 SV=2;>sp|Q5SVR0|TBC9B_MOUSE TBC1 domain family member 9B OS=Mus musculus (Mouse) OX=10090 GN=Tbc1d9b PE=1 SV=1	TBC1D9;TBC1D9B	2	2	-0.051954	0.681605	0.754953	FALSE	19	15	0.327599
P61971	P61971	>sp|P61971|NTF2_MOUSE Nuclear transport factor 2 OS=Mus musculus (Mouse) OX=10090 GN=Nutf2 PE=1 SV=1	NUTF2	1	1	-0.453075	0.0754309	0.127939	FALSE	10	8	0.266117
P39688	P39688	>sp|P39688|FYN_MOUSE Tyrosine-protein kinase Fyn OS=Mus musculus (Mouse) OX=10090 GN=Fyn PE=1 SV=4	FYN	8	6	0.0204723	0.772463	0.826995	FALSE	69	58	0.187451
Q64332;Q8JZP2	Q64332;Q8JZP2	>sp|Q64332|SYN2_MOUSE Synapsin-2 OS=Mus musculus (Mouse) OX=10090 GN=Syn2 PE=1 SV=2;>sp|Q8JZP2|SYN3_MOUSE Synapsin-3 OS=Mus musculus (Mouse) OX=10090 GN=Syn3 PE=1 SV=2	SYN2;SYN3	1	1	-0.277504	0.153394	0.233018	FALSE	10	8	0.266117
P16330	P16330	>sp|P16330|CN37_MOUSE 2',3'-cyclic-nucleotide 3'-phosphodiesterase OS=Mus musculus (Mouse) OX=10090 GN=Cnp PE=1 SV=3	CNP	9	4	-0.842143	6.35597e-06	3.81499e-05	TRUE	65	65	-0.168956
P50429	P50429	>sp|P50429|ARSB_MOUSE Arylsulfatase B OS=Mus musculus (Mouse) OX=10090 GN=Arsb PE=1 SV=3	ARSB	8	4	-0.585775	2.28748e-07	2.25089e-06	TRUE	52	52	-0.150045
Q5M8N0	Q5M8N0	>sp|Q5M8N0|CNRP1_MOUSE CB1 cannabinoid receptor-interacting protein 1 OS=Mus musculus (Mouse) OX=10090 GN=Cnrip1 PE=1 SV=1	CNRIP1	6	5	-0.684147	1.78256e-09	4.21431e-08	TRUE	50	41	0.252702
O35449	O35449	>sp|O35449|PRRT1_MOUSE Proline-rich transmembrane protein 1 OS=Mus musculus (Mouse) OX=10090 GN=Prrt1 PE=1 SV=1	PRRT1	3	3	-0.454664	0.000123699	0.000489195	TRUE	30	24	0.293811
P54227	P54227	>sp|P54227|STMN1_MOUSE Stathmin OS=Mus musculus (Mouse) OX=10090 GN=Stmn1 PE=1 SV=2	STMN1	5	4	-0.0756737	0.347987	0.452125	FALSE	43	38	0.0962191
O55060	O55060	>sp|O55060|TPMT_MOUSE Thiopurine S-methyltransferase OS=Mus musculus (Mouse) OX=10090 GN=Tpmt PE=1 SV=1	TPMT	5	1	-0.609503	0.0154218	0.0333575	FALSE	19	29	-0.975993
Q9D8B6	Q9D8B6	>sp|Q9D8B6|F210B_MOUSE Protein FAM210B, mitochondrial OS=Mus musculus (Mouse) OX=10090 GN=Fam210b PE=1 SV=3	FAM210B	2	2	0.469176	0.000401025	0.00135782	TRUE	20	16	0.286542
Q80X95	Q80X95	>sp|Q80X95|RRAGA_MOUSE Ras-related GTP-binding protein A OS=Mus musculus (Mouse) OX=10090 GN=Rraga PE=1 SV=1	RRAGA	1	1	0.0170608	0.868918	0.905026	FALSE	10	8	0.266117
B2RXQ2	B2RXQ2	>tr|B2RXQ2|B2RXQ2_MOUSE Ppfia1 protein OS=Mus musculus (Mouse) OX=10090 GN=Ppfia1 PE=1 SV=1	PPFIA1	4	3	0.0857396	0.2849	0.385901	FALSE	33	24	0.493146
P20357	P20357	>sp|P20357|MTAP2_MOUSE Microtubule-associated protein 2 OS=Mus musculus (Mouse) OX=10090 GN=Map2 PE=1 SV=2	MAP2	41	15	-0.84028	0.000110939	0.000445565	TRUE	226	261	-0.448904
Q9R013	Q9R013	>sp|Q9R013|CATF_MOUSE Cathepsin F OS=Mus musculus (Mouse) OX=10090 GN=Ctsf PE=1 SV=1	CTSF	3	1	0.0574345	0.65878	0.735995	FALSE	25	18	0.487339
Q0GA42;Q3TWN3	Q0GA42;Q3TWN3	>sp|Q0GA42|CNNM1_MOUSE Metal transporter CNNM1 OS=Mus musculus (Mouse) OX=10090 GN=Cnnm1 PE=1 SV=5;>sp|Q3TWN3|CNNM2_MOUSE Metal transporter CNNM2 OS=Mus musculus (Mouse) OX=10090 GN=Cnnm2 PE=1 SV=3	CNNM1;CNNM2	1	1	-0.540106	0.0350811	0.0671365	FALSE	8	7	0.0556599
Q91V57	Q91V57	>sp|Q91V57|CHIN_MOUSE N-chimaerin OS=Mus musculus (Mouse) OX=10090 GN=Chn1 PE=1 SV=2	CHN1	3	2	-0.278409	0.0313397	0.060924	FALSE	25	22	0.0839428
Q9WVK4	Q9WVK4	>sp|Q9WVK4|EHD1_MOUSE EH domain-containing protein 1 OS=Mus musculus (Mouse) OX=10090 GN=Ehd1 PE=1 SV=1	EHD1	18	13	0.090715	0.141875	0.218897	FALSE	139	117	0.204669
Q9Z0V2	Q9Z0V2	>sp|Q9Z0V2|KCND2_MOUSE Potassium voltage-gated channel subfamily D member 2 OS=Mus musculus (Mouse) OX=10090 GN=Kcnd2 PE=1 SV=1	KCND2	4	1	-0.368559	0.0851489	0.141497	FALSE	21	19	0.0369867
Q811P8	Q811P8	>sp|Q811P8|RHG32_MOUSE Rho GTPase-activating protein 32 OS=Mus musculus (Mouse) OX=10090 GN=Arhgap32 PE=1 SV=2	ARHGAP32	7	1	-0.204059	0.346768	0.451114	FALSE	36	31	0.147961
P97447	P97447	>sp|P97447|FHL1_MOUSE Four and a half LIM domains protein 1 OS=Mus musculus (Mouse) OX=10090 GN=Fhl1 PE=1 SV=3	FHL1	3	2	-0.386713	0.00012759	0.000501648	TRUE	24	24	-0.164613
Q9CQR4	Q9CQR4	>sp|Q9CQR4|ACO13_MOUSE Acyl-coenzyme A thioesterase 13 OS=Mus musculus (Mouse) OX=10090 GN=Acot13 PE=1 SV=1	ACOT13	4	3	-0.963852	8.77071e-12	6.78351e-10	TRUE	32	28	0.105316
P70414	P70414	>sp|P70414|NAC1_MOUSE Sodium/calcium exchanger 1 OS=Mus musculus (Mouse) OX=10090 GN=Slc8a1 PE=1 SV=1	SLC8A1	15	9	0.0546869	0.429067	0.533525	FALSE	122	105	0.145874
Q8VCH7	Q8VCH7	>sp|Q8VCH7|RDH10_MOUSE Retinol dehydrogenase 10 OS=Mus musculus (Mouse) OX=10090 GN=Rdh10 PE=1 SV=2	RDH10	1	1	0.887647	0.000371076	0.00126432	TRUE	10	8	0.266117
P31750;Q60823	P31750;Q60823	>sp|P31750|AKT1_MOUSE RAC-alpha serine/threonine-protein kinase OS=Mus musculus (Mouse) OX=10090 GN=Akt1 PE=1 SV=2;>sp|Q60823|AKT2_MOUSE RAC-beta serine/threonine-protein kinase OS=Mus musculus (Mouse) OX=10090 GN=Akt2 PE=1 SV=1	AKT1;AKT2	2	1	-0.395334	0.00124314	0.00363802	TRUE	16	14	0.128869
Q8R071	Q8R071	>sp|Q8R071|IP3KA_MOUSE Inositol-trisphosphate 3-kinase A OS=Mus musculus (Mouse) OX=10090 GN=Itpka PE=1 SV=1	ITPKA	11	0					37	69	-1.43276
P06745	P06745	>sp|P06745|G6PI_MOUSE Glucose-6-phosphate isomerase OS=Mus musculus (Mouse) OX=10090 GN=Gpi PE=1 SV=4	GPI	30	21	-0.824244	2.4281e-09	5.34824e-08	TRUE	234	209	0.0817476
Q9Z218	Q9Z218	>sp|Q9Z218|DPP6_MOUSE Dipeptidyl aminopeptidase-like protein 6 OS=Mus musculus (Mouse) OX=10090 GN=Dpp6 PE=1 SV=1	DPP6	24	16	-0.919229	1.00653e-12	1.60275e-10	TRUE	190	177	-0.0125639
Q8R3V5;Q9JK48	Q8R3V5;Q9JK48	>sp|Q8R3V5|SHLB2_MOUSE Endophilin-B2 OS=Mus musculus (Mouse) OX=10090 GN=Sh3glb2 PE=1 SV=2;>sp|Q9JK48|SHLB1_MOUSE Endophilin-B1 OS=Mus musculus (Mouse) OX=10090 GN=Sh3glb1 PE=1 SV=1	SH3GLB2;SH3GLB1	1	1	-0.839174	1.07285e-06	8.23887e-06	TRUE	10	8	0.266117
Q9JIA7	Q9JIA7	>sp|Q9JIA7|SPHK2_MOUSE Sphingosine kinase 2 OS=Mus musculus (Mouse) OX=10090 GN=Sphk2 PE=1 SV=2	SPHK2	8	2	-0.525936	7.65857e-06	4.46324e-05	TRUE	48	54	-0.410178
P60766	P60766	>sp|P60766|CDC42_MOUSE Cell division control protein 42 homolog OS=Mus musculus (Mouse) OX=10090 GN=Cdc42 PE=1 SV=2	CDC42	5	4	-0.373056	0.00116829	0.00344328	TRUE	43	39	0.0429539
Q9ES74	Q9ES74	>sp|Q9ES74|NEK7_MOUSE Serine/threonine-protein kinase Nek7 OS=Mus musculus (Mouse) OX=10090 GN=Nek7 PE=1 SV=1	NEK7	3	3	-0.101919	0.307031	0.409409	FALSE	29	23	0.309351
Q80UK0	Q80UK0	>sp|Q80UK0|SESD1_MOUSE SEC14 domain and spectrin repeat-containing protein 1 OS=Mus musculus (Mouse) OX=10090 GN=Sestd1 PE=1 SV=1	SESTD1	8	3	-0.269949	0.0281251	0.055544	FALSE	47	46	-0.12317
Q6PER3;Q8R001	Q6PER3;Q8R001	>sp|Q6PER3|MARE3_MOUSE Microtubule-associated protein RP/EB family member 3 OS=Mus musculus (Mouse) OX=10090 GN=Mapre3 PE=1 SV=1;>sp|Q8R001|MARE2_MOUSE Microtubule-associated protein RP/EB family member 2 OS=Mus musculus (Mouse) OX=10090 GN=Mapre2 PE=1 SV=1	MAPRE3;MAPRE2	1	1	-0.801491	8.72283e-08	1.01125e-06	TRUE	10	8	0.266117
Q9Z0P4	Q9Z0P4	>sp|Q9Z0P4|PALM_MOUSE Paralemmin-1 OS=Mus musculus (Mouse) OX=10090 GN=Palm PE=1 SV=1	PALM	13	10	-0.732306	2.13646e-07	2.13016e-06	TRUE	109	97	0.0839086
Q4ACU6	Q4ACU6	>sp|Q4ACU6|SHAN3_MOUSE SH3 and multiple ankyrin repeat domains protein 3 OS=Mus musculus (Mouse) OX=10090 GN=Shank3 PE=1 SV=3	SHANK3	1	0					4	6	-0.782793
P24527	P24527	>sp|P24527|LKHA4_MOUSE Leukotriene A-4 hydrolase OS=Mus musculus (Mouse) OX=10090 GN=Lta4h PE=1 SV=4	LTA4H	25	19	-0.0554337	0.439484	0.542975	FALSE	206	176	0.170067
Q9DB73	Q9DB73	>sp|Q9DB73|NB5R1_MOUSE NADH-cytochrome b5 reductase 1 OS=Mus musculus (Mouse) OX=10090 GN=Cyb5r1 PE=1 SV=1	CYB5R1	14	11	0.392106	8.02852e-06	4.63889e-05	TRUE	118	98	0.236236
Q03517	Q03517	>sp|Q03517|SCG2_MOUSE Secretogranin-2 OS=Mus musculus (Mouse) OX=10090 GN=Scg2 PE=1 SV=1	SCG2	15	6	0.907284	2.39099e-06	1.63444e-05	TRUE	127	78	0.841172
P30412	P30412	>sp|P30412|PPIC_MOUSE Peptidyl-prolyl cis-trans isomerase C OS=Mus musculus (Mouse) OX=10090 GN=Ppic PE=1 SV=1	PPIC	3	0					0	16	-6.13083
P23780	P23780	>sp|P23780|BGAL_MOUSE Beta-galactosidase OS=Mus musculus (Mouse) OX=10090 GN=Glb1 PE=1 SV=1	GLB1	12	10	-0.447343	4.61118e-06	2.88446e-05	TRUE	110	91	0.238053
Q9WUC3	Q9WUC3	>sp|Q9WUC3|LY6H_MOUSE Lymphocyte antigen 6H OS=Mus musculus (Mouse) OX=10090 GN=Ly6h PE=1 SV=2	LY6H	3	1	-0.273629	0.56415	0.655292	FALSE	19	19	-0.171084
Q9R1Z7	Q9R1Z7	>sp|Q9R1Z7|PTPS_MOUSE 6-pyruvoyl tetrahydrobiopterin synthase OS=Mus musculus (Mouse) OX=10090 GN=Pts PE=1 SV=2	PTS	4	2	-0.764546	6.45175e-05	0.000276562	TRUE	27	30	-0.376266
P20444;P68404	P20444;P68404	>sp|P20444|KPCA_MOUSE Protein kinase C alpha type OS=Mus musculus (Mouse) OX=10090 GN=Prkca PE=1 SV=3;>sp|P68404|KPCB_MOUSE Protein kinase C beta type OS=Mus musculus (Mouse) OX=10090 GN=Prkcb PE=1 SV=4	PRKCA;PRKCB	1	1	-0.340613	0.0275287	0.0545137	FALSE	10	8	0.266117
P13707	P13707	>sp|P13707|GPDA_MOUSE Glycerol-3-phosphate dehydrogenase [NAD(+)], cytoplasmic OS=Mus musculus (Mouse) OX=10090 GN=Gpd1 PE=1 SV=3	GPD1	15	2	-1.86819	4.5297e-11	2.38095e-09	TRUE	42	98	-1.88873
Q91ZD4	Q91ZD4	>sp|Q91ZD4|VANG2_MOUSE Vang-like protein 2 OS=Mus musculus (Mouse) OX=10090 GN=Vangl2 PE=1 SV=3	VANGL2	6	1	-0.00424964	0.979788	0.985065	FALSE	37	26	0.577932
O08900	O08900	>sp|O08900|IKZF3_MOUSE Zinc finger protein Aiolos OS=Mus musculus (Mouse) OX=10090 GN=Ikzf3 PE=1 SV=2	IKZF3	1	1	0.0661165	0.64218	0.72177	FALSE	10	8	0.266117
O88531	O88531	>sp|O88531|PPT1_MOUSE Palmitoyl-protein thioesterase 1 OS=Mus musculus (Mouse) OX=10090 GN=Ppt1 PE=1 SV=2	PPT1	8	3	-1.08683	4.0297e-10	1.29093e-08	TRUE	50	59	-0.506043
Q8K2A1	Q8K2A1	>sp|Q8K2A1|GULP1_MOUSE PTB domain-containing engulfment adapter protein 1 OS=Mus musculus (Mouse) OX=10090 GN=Gulp1 PE=1 SV=1	GULP1	1	1	0.0787436	0.79525	0.847036	FALSE	8	8	-0.201324
P58044	P58044	>sp|P58044|IDI1_MOUSE Isopentenyl-diphosphate Delta-isomerase 1 OS=Mus musculus (Mouse) OX=10090 GN=Idi1 PE=1 SV=1	IDI1	8	5	-0.322813	0.000511332	0.00168084	TRUE	62	57	0.0114601
Q810B7	Q810B7	>sp|Q810B7|SLIK5_MOUSE SLIT and NTRK-like protein 5 OS=Mus musculus (Mouse) OX=10090 GN=Slitrk5 PE=2 SV=1	SLITRK5	4	1	-0.101015	0.528545	0.624246	FALSE	23	26	-0.430905
Q9CX34	Q9CX34	>sp|Q9CX34|SGT1_MOUSE Protein SGT1 homolog OS=Mus musculus (Mouse) OX=10090 GN=Sugt1 PE=1 SV=3	SUGT1	11	8	-0.412746	1.97726e-05	0.000101085	TRUE	92	77	0.205178
P00920	P00920	>sp|P00920|CAH2_MOUSE Carbonic anhydrase 2 OS=Mus musculus (Mouse) OX=10090 GN=Ca2 PE=1 SV=4	CA2	9	0					26	63	-1.96162
Q8R313	Q8R313	>sp|Q8R313|EXOC6_MOUSE Exocyst complex component 6 OS=Mus musculus (Mouse) OX=10090 GN=Exoc6 PE=1 SV=2	EXOC6	9	5	-0.203124	0.0145192	0.0316325	FALSE	75	60	0.283498
Q9WTS6	Q9WTS6	>sp|Q9WTS6|TEN3_MOUSE Teneurin-3 OS=Mus musculus (Mouse) OX=10090 GN=Tenm3 PE=1 SV=1	TENM3	1	0					7	7	-0.170726
Q91ZJ5	Q91ZJ5	>sp|Q91ZJ5|UGPA_MOUSE UTP--glucose-1-phosphate uridylyltransferase OS=Mus musculus (Mouse) OX=10090 GN=Ugp2 PE=1 SV=3	UGP2	19	10	-1.11376	1.44362e-13	6.0121e-11	TRUE	123	135	-0.3519
Q99LY9	Q99LY9	>sp|Q99LY9|NDUS5_MOUSE NADH dehydrogenase [ubiquinone] iron-sulfur protein 5 OS=Mus musculus (Mouse) OX=10090 GN=Ndufs5 PE=1 SV=3	NDUFS5	2	2	-0.468901	9.25348e-06	5.22947e-05	TRUE	20	16	0.286542
P61161	P61161	>sp|P61161|ARP2_MOUSE Actin-related protein 2 OS=Mus musculus (Mouse) OX=10090 GN=Actr2 PE=1 SV=1	ACTR2	9	7	-0.500715	1.10344e-08	1.79941e-07	TRUE	77	67	0.121385
Q9ESJ4	Q9ESJ4	>sp|Q9ESJ4|SPN90_MOUSE NCK-interacting protein with SH3 domain OS=Mus musculus (Mouse) OX=10090 GN=Nckipsd PE=1 SV=2	NCKIPSD	10	6	-0.663266	4.90771e-08	6.35654e-07	TRUE	72	75	-0.243062
Q8CFX3	Q8CFX3	>tr|Q8CFX3|Q8CFX3_MOUSE Protocadherin 1 OS=Mus musculus (Mouse) OX=10090 GN=Pcdh1 PE=1 SV=1	PCDH1	21	11	-1.45614	7.38131e-11	3.35819e-09	TRUE	141	159	-0.410344
Q64521	Q64521	>sp|Q64521|GPDM_MOUSE Glycerol-3-phosphate dehydrogenase, mitochondrial OS=Mus musculus (Mouse) OX=10090 GN=Gpd2 PE=1 SV=2	GPD2	45	31	0.143228	0.0493632	0.0889655	FALSE	369	304	0.244881
Q9R088	Q9R088	>sp|Q9R088|KITM_MOUSE Thymidine kinase 2, mitochondrial OS=Mus musculus (Mouse) OX=10090 GN=Tk2 PE=1 SV=2	TK2	3	3	-0.100684	0.320982	0.423853	FALSE	28	24	0.134517
Q812A2;Q91Z69	Q812A2;Q91Z69	>sp|Q812A2|SRGP3_MOUSE SLIT-ROBO Rho GTPase-activating protein 3 OS=Mus musculus (Mouse) OX=10090 GN=Srgap3 PE=1 SV=1;>sp|Q91Z69|SRGP1_MOUSE SLIT-ROBO Rho GTPase-activating protein 1 OS=Mus musculus (Mouse) OX=10090 GN=Srgap1 PE=1 SV=2	SRGAP3;SRGAP1	4	2	-0.746585	6.48491e-08	7.90872e-07	TRUE	24	32	-0.748066
Q8BXR9	Q8BXR9	>sp|Q8BXR9|OSBL6_MOUSE Oxysterol-binding protein-related protein 6 OS=Mus musculus (Mouse) OX=10090 GN=Osbpl6 PE=1 SV=1	OSBPL6	12	6	-0.177166	0.0110506	0.0249907	FALSE	88	78	0.0901301
Q3TES0;Q5DU25;Q8R0S2	Q3TES0;Q5DU25;Q8R0S2	>sp|Q3TES0|IQEC3_MOUSE IQ motif and SEC7 domain-containing protein 3 OS=Mus musculus (Mouse) OX=10090 GN=Iqsec3 PE=1 SV=1;>sp|Q5DU25|IQEC2_MOUSE IQ motif and SEC7 domain-containing protein 2 OS=Mus musculus (Mouse) OX=10090 GN=Iqsec2 PE=1 SV=3;>sp|Q8R0S2|IQEC1_MOUSE IQ motif and SEC7 domain-containing protein 1 OS=Mus musculus (Mouse) OX=10090 GN=Iqsec1 PE=1 SV=2	IQSEC3;IQSEC2;IQSEC1	1	0					7	8	-0.450796
Q9Z0E0	Q9Z0E0	>sp|Q9Z0E0|NCDN_MOUSE Neurochondrin OS=Mus musculus (Mouse) OX=10090 GN=Ncdn PE=1 SV=1	NCDN	17	17	-0.158803	0.0546324	0.0970406	FALSE	168	134	0.31328
P51150	P51150	>sp|P51150|RAB7A_MOUSE Ras-related protein Rab-7a OS=Mus musculus (Mouse) OX=10090 GN=Rab7a PE=1 SV=2	RAB7A	16	12	-0.170531	0.0168888	0.036098	FALSE	140	116	0.233532
Q6P9K9	Q6P9K9	>sp|Q6P9K9|NRX3A_MOUSE Neurexin-3 OS=Mus musculus (Mouse) OX=10090 GN=Nrxn3 PE=1 SV=2	NRXN3	20	11	-0.937532	3.82247e-08	5.13654e-07	TRUE	145	151	-0.243535
Q9QYS9	Q9QYS9	>sp|Q9QYS9|QKI_MOUSE Protein quaking OS=Mus musculus (Mouse) OX=10090 GN=Qki PE=1 SV=1	QKI	9	0					10	54	-3.50094
P10922	P10922	>sp|P10922|H10_MOUSE Histone H1.0 OS=Mus musculus (Mouse) OX=10090 GN=H1-0 PE=2 SV=4	H1-0	5	5	0.0175341	0.872824	0.907174	FALSE	48	40	0.219465
P62482	P62482	>sp|P62482|KCAB2_MOUSE Voltage-gated potassium channel subunit beta-2 OS=Mus musculus (Mouse) OX=10090 GN=Kcnab2 PE=1 SV=1	KCNAB2	10	9	-0.334851	0.000166532	0.000631374	TRUE	94	74	0.333276
P27659	P27659	>sp|P27659|RL3_MOUSE 60S ribosomal protein L3 OS=Mus musculus (Mouse) OX=10090 GN=Rpl3 PE=1 SV=3	RPL3	15	10	1.09176	7.76888e-07	6.30595e-06	TRUE	120	87	0.505863
P15379	P15379	>sp|P15379|CD44_MOUSE CD44 antigen OS=Mus musculus (Mouse) OX=10090 GN=Cd44 PE=1 SV=3	CD44	1	0					5	8	-1.04003
Q04690	Q04690	>sp|Q04690|NF1_MOUSE Neurofibromin OS=Mus musculus (Mouse) OX=10090 GN=Nf1 PE=1 SV=1	NF1	17	6	0.153766	0.25545	0.353348	FALSE	142	84	0.902309
O35874	O35874	>sp|O35874|SATT_MOUSE Neutral amino acid transporter A OS=Mus musculus (Mouse) OX=10090 GN=Slc1a4 PE=1 SV=1	SLC1A4	9	7	-0.876749	9.87168e-08	1.11113e-06	TRUE	73	64	0.115206
P51661	P51661	>sp|P51661|DHI2_MOUSE Corticosteroid 11-beta-dehydrogenase isozyme 2 OS=Mus musculus (Mouse) OX=10090 GN=Hsd11b2 PE=1 SV=2	HSD11B2	1	0					7	6	0.111884
Q8CC35	Q8CC35	>sp|Q8CC35|SYNPO_MOUSE Synaptopodin OS=Mus musculus (Mouse) OX=10090 GN=Synpo PE=1 SV=2	SYNPO	17	0					14	115	-4.45898
Q9Z1P6	Q9Z1P6	>sp|Q9Z1P6|NDUA7_MOUSE NADH dehydrogenase [ubiquinone] 1 alpha subcomplex subunit 7 OS=Mus musculus (Mouse) OX=10090 GN=Ndufa7 PE=1 SV=3	NDUFA7	7	4	-0.345602	1.12298e-05	6.1787e-05	TRUE	49	51	-0.234362
Q505D9;Q8C7M3	Q505D9;Q8C7M3	>sp|Q505D9|TRI67_MOUSE Tripartite motif-containing protein 67 OS=Mus musculus (Mouse) OX=10090 GN=Trim67 PE=2 SV=1;>sp|Q8C7M3|TRIM9_MOUSE E3 ubiquitin-protein ligase TRIM9 OS=Mus musculus (Mouse) OX=10090 GN=Trim9 PE=1 SV=2	TRIM67;TRIM9	1	1	-0.977514	2.77908e-05	0.000135305	TRUE	10	8	0.266117
P26231	P26231	>sp|P26231|CTNA1_MOUSE Catenin alpha-1 OS=Mus musculus (Mouse) OX=10090 GN=Ctnna1 PE=1 SV=1	CTNNA1	17	2	-0.565381	0.000368289	0.00125562	TRUE	60	107	-1.36531
Q91W61	Q91W61	>sp|Q91W61|FXL15_MOUSE F-box/LRR-repeat protein 15 OS=Mus musculus (Mouse) OX=10090 GN=Fbxl15 PE=1 SV=2	FBXL15	2	1	0.0946636	0.703751	0.771746	FALSE	16	10	0.771009
O54983	O54983	>sp|O54983|CRYM_MOUSE Ketimine reductase mu-crystallin OS=Mus musculus (Mouse) OX=10090 GN=Crym PE=1 SV=1	CRYM	13	11	-1.38255	4.20455e-09	8.3689e-08	TRUE	116	98	0.190057
Q8BMS1	Q8BMS1	>sp|Q8BMS1|ECHA_MOUSE Trifunctional enzyme subunit alpha, mitochondrial OS=Mus musculus (Mouse) OX=10090 GN=Hadha PE=1 SV=1	HADHA	30	19	-0.672223	6.69988e-12	5.85051e-10	TRUE	227	208	0.0237355
Q8BX94	Q8BX94	>sp|Q8BX94|OSBL2_MOUSE Oxysterol-binding protein-related protein 2 OS=Mus musculus (Mouse) OX=10090 GN=Osbpl2 PE=1 SV=1	OSBPL2	10	4	-0.468256	2.78408e-06	1.86547e-05	TRUE	71	65	0.0199633
P08556;Q61411	P08556;Q61411	>sp|P08556|RASN_MOUSE GTPase NRas OS=Mus musculus (Mouse) OX=10090 GN=Nras PE=1 SV=1;>sp|Q61411|RASH_MOUSE GTPase HRas OS=Mus musculus (Mouse) OX=10090 GN=Hras PE=1 SV=2	NRAS;HRAS	3	2	-0.266997	0.0227004	0.0464475	FALSE	27	24	0.0950895
P49813;Q9JHJ0;Q9JKK7	P49813;Q9JHJ0;Q9JKK7	>sp|P49813|TMOD1_MOUSE Tropomodulin-1 OS=Mus musculus (Mouse) OX=10090 GN=Tmod1 PE=1 SV=2;>sp|Q9JHJ0|TMOD3_MOUSE Tropomodulin-3 OS=Mus musculus (Mouse) OX=10090 GN=Tmod3 PE=1 SV=1;>sp|Q9JKK7|TMOD2_MOUSE Tropomodulin-2 OS=Mus musculus (Mouse) OX=10090 GN=Tmod2 PE=1 SV=2	TMOD1;TMOD3;TMOD2	1	1	-0.681905	0.0572392	0.100844	FALSE	10	8	0.266117
P28660	P28660	>sp|P28660|NCKP1_MOUSE Nck-associated protein 1 OS=Mus musculus (Mouse) OX=10090 GN=Nckap1 PE=1 SV=2	NCKAP1	43	34	-0.322128	1.48539e-06	1.08821e-05	TRUE	377	320	0.179872
Q8BJ42	Q8BJ42	>sp|Q8BJ42|DLGP2_MOUSE Disks large-associated protein 2 OS=Mus musculus (Mouse) OX=10090 GN=Dlgap2 PE=1 SV=2	DLGAP2	5	3	-0.466836	7.84243e-05	0.000327363	TRUE	35	36	-0.233577
P58802	P58802	>sp|P58802|TB10A_MOUSE TBC1 domain family member 10A OS=Mus musculus (Mouse) OX=10090 GN=Tbc1d10a PE=1 SV=1	TBC1D10A	5	3	0.169678	0.160296	0.241806	FALSE	41	34	0.227774
Q8R332	Q8R332	>sp|Q8R332|NUP58_MOUSE Nucleoporin p58/p45 OS=Mus musculus (Mouse) OX=10090 GN=Nup58 PE=1 SV=1	NUP58	1	0					7	8	-0.40693
Q6P5F6	Q6P5F6	>sp|Q6P5F6|S39AA_MOUSE Zinc transporter ZIP10 OS=Mus musculus (Mouse) OX=10090 GN=Slc39a10 PE=1 SV=1	SLC39A10	8	4	0.153462	0.0382175	0.0719685	FALSE	59	52	0.0973862
Q06138	Q06138	>sp|Q06138|CAB39_MOUSE Calcium-binding protein 39 OS=Mus musculus (Mouse) OX=10090 GN=Cab39 PE=1 SV=2	CAB39	13	7	-0.416061	3.11273e-05	0.000148872	TRUE	94	87	0.00307081
Q9CQP2	Q9CQP2	>sp|Q9CQP2|TPPC2_MOUSE Trafficking protein particle complex subunit 2 OS=Mus musculus (Mouse) OX=10090 GN=Trappc2 PE=1 SV=1	TRAPPC2	2	1	-0.213015	0.15023	0.229823	FALSE	16	11	0.584871
Q62277	Q62277	>sp|Q62277|SYPH_MOUSE Synaptophysin OS=Mus musculus (Mouse) OX=10090 GN=Syp PE=1 SV=2	SYP	7	4	0.0439841	0.520286	0.617184	FALSE	50	44	0.114405
P23818;P23819	P23818;P23819	>sp|P23818|GRIA1_MOUSE Glutamate receptor 1 OS=Mus musculus (Mouse) OX=10090 GN=Gria1 PE=1 SV=1;>sp|P23819|GRIA2_MOUSE Glutamate receptor 2 OS=Mus musculus (Mouse) OX=10090 GN=Gria2 PE=1 SV=3	GRIA1;GRIA2	3	2	-0.832442	4.52631e-08	5.9624e-07	TRUE	20	17	0.174459
P35276;Q9CZT8	P35276;Q9CZT8	>sp|P35276|RAB3D_MOUSE Ras-related protein Rab-3D OS=Mus musculus (Mouse) OX=10090 GN=Rab3d PE=1 SV=1;>sp|Q9CZT8|RAB3B_MOUSE Ras-related protein Rab-3B OS=Mus musculus (Mouse) OX=10090 GN=Rab3b PE=1 SV=1	RAB3D;RAB3B	1	1	-0.376971	0.0201531	0.0419972	FALSE	10	8	0.266117
Q8VD37	Q8VD37	>sp|Q8VD37|SGIP1_MOUSE SH3-containing GRB2-like protein 3-interacting protein 1 OS=Mus musculus (Mouse) OX=10090 GN=Sgip1 PE=1 SV=1	SGIP1	20	12	-0.671737	1.36913e-07	1.4825e-06	TRUE	144	148	-0.206442
Q9QZM0	Q9QZM0	>sp|Q9QZM0|UBQL2_MOUSE Ubiquilin-2 OS=Mus musculus (Mouse) OX=10090 GN=Ubqln2 PE=1 SV=2	UBQLN2	9	8	-0.602599	5.76119e-07	4.89656e-06	TRUE	83	70	0.198321
P59326;Q8BYK6;Q91YT7	P59326;Q8BYK6;Q91YT7	>sp|P59326|YTHD1_MOUSE YTH domain-containing family protein 1 OS=Mus musculus (Mouse) OX=10090 GN=Ythdf1 PE=1 SV=1;>sp|Q8BYK6|YTHD3_MOUSE YTH domain-containing family protein 3 OS=Mus musculus (Mouse) OX=10090 GN=Ythdf3 PE=1 SV=2;>sp|Q91YT7|YTHD2_MOUSE YTH domain-containing family protein 2 OS=Mus musculus (Mouse) OX=10090 GN=Ythdf2 PE=1 SV=1	YTHDF1;YTHDF3;YTHDF2	2	2	-0.811675	3.46222e-07	3.22624e-06	TRUE	20	16	0.286542
Q9CQI3	Q9CQI3	>sp|Q9CQI3|GMFB_MOUSE Glia maturation factor beta OS=Mus musculus (Mouse) OX=10090 GN=Gmfb PE=1 SV=3	GMFB	6	4	-0.870218	1.38666e-08	2.19514e-07	TRUE	43	43	-0.150426
Q3UHG7	Q3UHG7	>sp|Q3UHG7|DEN11_MOUSE DENN domain-containing protein 11 OS=Mus musculus (Mouse) OX=10090 GN=Dennd11 PE=2 SV=1	DENND11	7	1	0.883408	0.000179402	0.000672168	TRUE	58	23	1.70203
Q8BPQ7	Q8BPQ7	>sp|Q8BPQ7|SGSM1_MOUSE Small G protein signaling modulator 1 OS=Mus musculus (Mouse) OX=10090 GN=Sgsm1 PE=1 SV=2	SGSM1	12	4	-0.0995331	0.256826	0.35507	FALSE	74	68	-0.00128511
Q8K4F5	Q8K4F5	>sp|Q8K4F5|ABHDB_MOUSE Protein ABHD11 OS=Mus musculus (Mouse) OX=10090 GN=Abhd11 PE=1 SV=1	ABHD11	5	3	0.15524	0.155387	0.235582	FALSE	41	32	0.339103
P97346	P97346	>sp|P97346|NXN_MOUSE Nucleoredoxin OS=Mus musculus (Mouse) OX=10090 GN=Nxn PE=1 SV=1	NXN	4	0					23	16	0.58586
Q68FH0	Q68FH0	>sp|Q68FH0|PKP4_MOUSE Plakophilin-4 OS=Mus musculus (Mouse) OX=10090 GN=Pkp4 PE=1 SV=1	PKP4	19	10	-0.53091	7.59432e-09	1.33629e-07	TRUE	126	130	-0.226424
P39054;Q8BZ98	P39054;Q8BZ98	>sp|P39054|DYN2_MOUSE Dynamin-2 OS=Mus musculus (Mouse) OX=10090 GN=Dnm2 PE=1 SV=2;>sp|Q8BZ98|DYN3_MOUSE Dynamin-3 OS=Mus musculus (Mouse) OX=10090 GN=Dnm3 PE=1 SV=1	DNM2;DNM3	6	3	-0.477396	9.82403e-06	5.48323e-05	TRUE	44	44	-0.157087
Q8BG39	Q8BG39	>sp|Q8BG39|SV2B_MOUSE Synaptic vesicle glycoprotein 2B OS=Mus musculus (Mouse) OX=10090 GN=Sv2b PE=1 SV=1	SV2B	14	8	-1.05312	9.57785e-09	1.6154e-07	TRUE	91	87	-0.0506972
Q7TSJ2	Q7TSJ2	>sp|Q7TSJ2|MAP6_MOUSE Microtubule-associated protein 6 OS=Mus musculus (Mouse) OX=10090 GN=Map6 PE=1 SV=2	MAP6	52	43	-0.573888	5.99576e-07	5.04837e-06	TRUE	464	393	0.188766
P52503	P52503	>sp|P52503|NDUS6_MOUSE NADH dehydrogenase [ubiquinone] iron-sulfur protein 6, mitochondrial OS=Mus musculus (Mouse) OX=10090 GN=Ndufs6 PE=1 SV=2	NDUFS6	6	5	-0.477676	6.96874e-05	0.000295448	TRUE	54	46	0.170041
Q8BTF8	Q8BTF8	>sp|Q8BTF8|RALYL_MOUSE RNA-binding Raly-like protein OS=Mus musculus (Mouse) OX=10090 GN=Ralyl PE=2 SV=1	RALYL	4	2	0.0198983	0.831743	0.876252	FALSE	32	22	0.58399
Q8K4G5	Q8K4G5	>sp|Q8K4G5|ABLM1_MOUSE Actin-binding LIM protein 1 OS=Mus musculus (Mouse) OX=10090 GN=Ablim1 PE=1 SV=1	ABLIM1	12	5	-0.319326	0.000537705	0.00175159	TRUE	79	72	0.0236892
O35344	O35344	>sp|O35344|IMA4_MOUSE Importin subunit alpha-4 OS=Mus musculus (Mouse) OX=10090 GN=Kpna3 PE=1 SV=1	KPNA3	5	4	-0.450976	7.14879e-06	4.22067e-05	TRUE	44	39	0.0898224
Q9EQ20	Q9EQ20	>sp|Q9EQ20|MMSA_MOUSE Methylmalonate-semialdehyde dehydrogenase [acylating], mitochondrial OS=Mus musculus (Mouse) OX=10090 GN=Aldh6a1 PE=1 SV=1	ALDH6A1	17	13	-0.82843	1.27695e-10	5.0834e-09	TRUE	139	125	0.065743
Q9WV34	Q9WV34	>sp|Q9WV34|MPP2_MOUSE MAGUK p55 subfamily member 2 OS=Mus musculus (Mouse) OX=10090 GN=Mpp2 PE=1 SV=1	MPP2	22	16	-0.61163	3.65421e-10	1.19903e-08	TRUE	187	167	0.0738478
P61982;P68254;P68510;Q9CQV8	P61982;P68254;P68510;Q9CQV8	>sp|P61982|1433G_MOUSE 14-3-3 protein gamma OS=Mus musculus (Mouse) OX=10090 GN=Ywhag PE=1 SV=2;>sp|P68254|1433T_MOUSE 14-3-3 protein theta OS=Mus musculus (Mouse) OX=10090 GN=Ywhaq PE=1 SV=1;>sp|P68510|1433F_MOUSE 14-3-3 protein eta OS=Mus musculus (Mouse) OX=10090 GN=Ywhah PE=1 SV=2;>sp|Q9CQV8|1433B_MOUSE 14-3-3 protein beta/alpha OS=Mus musculus (Mouse) OX=10090 GN=Ywhab PE=1 SV=3	YWHAG;YWHAQ;YWHAH;YWHAB	1	1	-1.07228	1.19722e-05	6.51433e-05	TRUE	10	8	0.266117
P25785	P25785	>sp|P25785|TIMP2_MOUSE Metalloproteinase inhibitor 2 OS=Mus musculus (Mouse) OX=10090 GN=Timp2 PE=1 SV=2	TIMP2	2	1	-0.409969	0.0357068	0.0681412	FALSE	9	7	0.285611
A0A338P7C9	A0A338P7C9	>tr|A0A338P7C9|A0A338P7C9_MOUSE Transmembrane protein 181A OS=Mus musculus (Mouse) OX=10090 GN=Tmem181a PE=1 SV=1	TMEM181A	3	2	0.4893	0.00029923	0.00105197	TRUE	25	18	0.489549
P50396	P50396	>sp|P50396|GDIA_MOUSE Rab GDP dissociation inhibitor alpha OS=Mus musculus (Mouse) OX=10090 GN=Gdi1 PE=1 SV=3	GDI1	26	15	-0.406286	0.000256105	0.000917638	TRUE	176	166	-0.0383235
Q7TMR0	Q7TMR0	>sp|Q7TMR0|PCP_MOUSE Lysosomal Pro-X carboxypeptidase OS=Mus musculus (Mouse) OX=10090 GN=Prcp PE=1 SV=2	PRCP	7	2	-0.350399	0.00165816	0.00466594	TRUE	46	44	-0.0599614
Q812A2	Q812A2	>sp|Q812A2|SRGP3_MOUSE SLIT-ROBO Rho GTPase-activating protein 3 OS=Mus musculus (Mouse) OX=10090 GN=Srgap3 PE=1 SV=1	SRGAP3	31	11	-1.08645	1.21772e-12	1.83132e-10	TRUE	156	222	-0.897228
Q8CHY3	Q8CHY3	>sp|Q8CHY3|DYM_MOUSE Dymeclin OS=Mus musculus (Mouse) OX=10090 GN=Dym PE=1 SV=1	DYM	5	2	-0.307228	0.0600188	0.105023	FALSE	35	22	0.752179
Q62048	Q62048	>sp|Q62048|PEA15_MOUSE Astrocytic phosphoprotein PEA-15 OS=Mus musculus (Mouse) OX=10090 GN=Pea15 PE=1 SV=1	PEA15	7	5	-0.354441	0.00258931	0.00690568	TRUE	56	50	0.0806219
Q922J3;Q9Z0H8	Q922J3;Q9Z0H8	>sp|Q922J3|CLIP1_MOUSE CAP-Gly domain-containing linker protein 1 OS=Mus musculus (Mouse) OX=10090 GN=Clip1 PE=1 SV=1;>sp|Q9Z0H8|CLIP2_MOUSE CAP-Gly domain-containing linker protein 2 OS=Mus musculus (Mouse) OX=10090 GN=Clip2 PE=1 SV=2	CLIP1;CLIP2	4	3	-0.761087	3.57482e-06	2.31785e-05	TRUE	29	30	-0.233221
Q9CY58	Q9CY58	>sp|Q9CY58|PAIRB_MOUSE Plasminogen activator inhibitor 1 RNA-binding protein OS=Mus musculus (Mouse) OX=10090 GN=Serbp1 PE=1 SV=2	SERBP1	11	4	-0.843976	4.63379e-08	6.04515e-07	TRUE	64	72	-0.38756
Q8VDQ8	Q8VDQ8	>sp|Q8VDQ8|SIR2_MOUSE NAD-dependent protein deacetylase sirtuin-2 OS=Mus musculus (Mouse) OX=10090 GN=Sirt2 PE=1 SV=2	SIRT2	6	1	-2.12711	1.09998e-05	6.05826e-05	TRUE	22	41	-1.38819
Q9ES28	Q9ES28	>sp|Q9ES28|ARHG7_MOUSE Rho guanine nucleotide exchange factor 7 OS=Mus musculus (Mouse) OX=10090 GN=Arhgef7 PE=1 SV=2	ARHGEF7	23	10	-0.46751	3.96223e-08	5.28813e-07	TRUE	140	164	-0.487148
P12382	P12382	>sp|P12382|PFKAL_MOUSE ATP-dependent 6-phosphofructokinase, liver type OS=Mus musculus (Mouse) OX=10090 GN=Pfkl PE=1 SV=4	PFKL	16	8	-0.107744	0.12147	0.191063	FALSE	118	98	0.226763
O35526;P61264	O35526;P61264	>sp|O35526|STX1A_MOUSE Syntaxin-1A OS=Mus musculus (Mouse) OX=10090 GN=Stx1a PE=1 SV=3;>sp|P61264|STX1B_MOUSE Syntaxin-1B OS=Mus musculus (Mouse) OX=10090 GN=Stx1b PE=1 SV=1	STX1A;STX1B	1	1	-0.0240839	0.879783	0.913005	FALSE	10	8	0.266117
Q9CSN1	Q9CSN1	>sp|Q9CSN1|SNW1_MOUSE SNW domain-containing protein 1 OS=Mus musculus (Mouse) OX=10090 GN=Snw1 PE=1 SV=3	SNW1	4	3	-0.152213	0.130825	0.203764	FALSE	27	28	-0.208563
Q9DAU1	Q9DAU1	>sp|Q9DAU1|CNPY3_MOUSE Protein canopy homolog 3 OS=Mus musculus (Mouse) OX=10090 GN=Cnpy3 PE=1 SV=1	CNPY3	4	0					13	19	-0.894358
P59281	P59281	>sp|P59281|RHG39_MOUSE Rho GTPase-activating protein 39 OS=Mus musculus (Mouse) OX=10090 GN=Arhgap39 PE=1 SV=2	ARHGAP39	14	2	-0.85748	5.21627e-06	3.22017e-05	TRUE	50	89	-1.34534
P62484	P62484	>sp|P62484|ABI2_MOUSE Abl interactor 2 OS=Mus musculus (Mouse) OX=10090 GN=Abi2 PE=1 SV=1	ABI2	8	4	-0.269418	0.0290006	0.0569286	FALSE	62	56	0.0342167
Q9CVB6	Q9CVB6	>sp|Q9CVB6|ARPC2_MOUSE Actin-related protein 2/3 complex subunit 2 OS=Mus musculus (Mouse) OX=10090 GN=Arpc2 PE=1 SV=3	ARPC2	22	16	-0.637921	1.32283e-09	3.30038e-08	TRUE	184	154	0.217364
Q91V09	Q91V09	>sp|Q91V09|WDR13_MOUSE WD repeat-containing protein 13 OS=Mus musculus (Mouse) OX=10090 GN=Wdr13 PE=1 SV=1	WDR13	14	8	-0.331311	0.000484134	0.00160018	TRUE	95	91	-0.0647995
P21107	P21107	>sp|P21107|TPM3_MOUSE Tropomyosin alpha-3 chain OS=Mus musculus (Mouse) OX=10090 GN=Tpm3 PE=1 SV=3	TPM3	7	3	-0.802015	3.81564e-07	3.47776e-06	TRUE	47	43	0.0431681
P62627	P62627	>sp|P62627|DLRB1_MOUSE Dynein light chain roadblock-type 1 OS=Mus musculus (Mouse) OX=10090 GN=Dynlrb1 PE=1 SV=3	DYNLRB1	2	2	-0.468101	0.0144812	0.0315753	FALSE	20	16	0.286542
Q9WUA6	Q9WUA6	>sp|Q9WUA6|AKT3_MOUSE RAC-gamma serine/threonine-protein kinase OS=Mus musculus (Mouse) OX=10090 GN=Akt3 PE=1 SV=1	AKT3	8	5	-0.0190633	0.809713	0.858116	FALSE	69	54	0.330721
Q9JKM7	Q9JKM7	>sp|Q9JKM7|RAB37_MOUSE Ras-related protein Rab-37 OS=Mus musculus (Mouse) OX=10090 GN=Rab37 PE=1 SV=2	RAB37	1	0					7	8	-0.402733
P62823;P63011	P62823;P63011	>sp|P62823|RAB3C_MOUSE Ras-related protein Rab-3C OS=Mus musculus (Mouse) OX=10090 GN=Rab3c PE=1 SV=1;>sp|P63011|RAB3A_MOUSE Ras-related protein Rab-3A OS=Mus musculus (Mouse) OX=10090 GN=Rab3a PE=1 SV=1	RAB3C;RAB3A	1	1	-0.390622	0.115214	0.18267	FALSE	10	8	0.266117
Q8BHK2	Q8BHK2	>sp|Q8BHK2|SCN3B_MOUSE Sodium channel subunit beta-3 OS=Mus musculus (Mouse) OX=10090 GN=Scn3b PE=1 SV=1	SCN3B	3	2	0.715396	0.0024544	0.00659787	TRUE	29	21	0.481008
Q9DD18	Q9DD18	>sp|Q9DD18|DTD1_MOUSE D-aminoacyl-tRNA deacylase 1 OS=Mus musculus (Mouse) OX=10090 GN=Dtd1 PE=1 SV=2	DTD1	5	2	-0.0890478	0.541131	0.63513	FALSE	31	33	-0.270098
Q61739	Q61739	>sp|Q61739|ITA6_MOUSE Integrin alpha-6 OS=Mus musculus (Mouse) OX=10090 GN=Itga6 PE=1 SV=3	ITGA6	21	6	-0.649791	1.38245e-06	1.02109e-05	TRUE	113	134	-0.514125
O08715	O08715	>sp|O08715|AKAP1_MOUSE A-kinase anchor protein 1, mitochondrial OS=Mus musculus (Mouse) OX=10090 GN=Akap1 PE=1 SV=4	AKAP1	4	0					15	17	-0.41368
Q62084	Q62084	>sp|Q62084|PP14B_MOUSE Protein phosphatase 1 regulatory subunit 14B OS=Mus musculus (Mouse) OX=10090 GN=Ppp1r14b PE=1 SV=2	PPP1R14B	1	0					2	7	-2.2671
Q91XL9	Q91XL9	>sp|Q91XL9|OSBL1_MOUSE Oxysterol-binding protein-related protein 1 OS=Mus musculus (Mouse) OX=10090 GN=Osbpl1a PE=1 SV=2	OSBPL1A	8	4	-0.0306925	0.767989	0.823672	FALSE	59	53	0.0428261
P68254	P68254	>sp|P68254|1433T_MOUSE 14-3-3 protein theta OS=Mus musculus (Mouse) OX=10090 GN=Ywhaq PE=1 SV=1	YWHAQ	7	6	-0.195627	0.0222581	0.0457432	FALSE	63	54	0.151568
P05063;P05064	P05063;P05064	>sp|P05063|ALDOC_MOUSE Fructose-bisphosphate aldolase C OS=Mus musculus (Mouse) OX=10090 GN=Aldoc PE=1 SV=4;>sp|P05064|ALDOA_MOUSE Fructose-bisphosphate aldolase A OS=Mus musculus (Mouse) OX=10090 GN=Aldoa PE=1 SV=2	ALDOC;ALDOA	2	0					13	13	-0.149209
B9EJ86	B9EJ86	>sp|B9EJ86|OSBL8_MOUSE Oxysterol-binding protein-related protein 8 OS=Mus musculus (Mouse) OX=10090 GN=Osbpl8 PE=1 SV=1	OSBPL8	16	12	0.250534	0.000804945	0.00249169	FALSE	138	116	0.196997
D3Z2H9	D3Z2H9	>tr|D3Z2H9|D3Z2H9_MOUSE Tropomyosin 3, related sequence 7 OS=Mus musculus (Mouse) OX=10090 GN=Tpm3-rs7 PE=3 SV=1	TPM3-RS7	4	4	-0.733212	1.84159e-07	1.89551e-06	TRUE	40	32	0.297538
Q6P069	Q6P069	>sp|Q6P069|SORCN_MOUSE Sorcin OS=Mus musculus (Mouse) OX=10090 GN=Sri PE=1 SV=1	SRI	6	4	-0.088795	0.352627	0.45651	FALSE	52	44	0.185073
Q80TI0	Q80TI0	>sp|Q80TI0|ASTRB_MOUSE Protein Aster-B OS=Mus musculus (Mouse) OX=10090 GN=Gramd1b PE=1 SV=2	GRAMD1B	7	1	-0.570294	1.18347e-05	6.45112e-05	TRUE	29	35	-0.526554
Q60634	Q60634	>sp|Q60634|FLOT2_MOUSE Flotillin-2 OS=Mus musculus (Mouse) OX=10090 GN=Flot2 PE=1 SV=2	FLOT2	21	16	-0.0377773	0.608647	0.693875	FALSE	178	147	0.24452
P28028	P28028	>sp|P28028|BRAF_MOUSE Serine/threonine-protein kinase B-raf OS=Mus musculus (Mouse) OX=10090 GN=Braf PE=1 SV=3	BRAF	4	3	-0.455822	6.54556e-05	0.00028014	TRUE	30	27	0.0536351
Q9QZQ8	Q9QZQ8	>sp|Q9QZQ8|H2AY_MOUSE Core histone macro-H2A.1 OS=Mus musculus (Mouse) OX=10090 GN=H2afy PE=1 SV=3	H2AFY	8	8	0.468149	0.00540633	0.0132864	FALSE	80	63	0.333203
Q8R502	Q8R502	>sp|Q8R502|LRC8C_MOUSE Volume-regulated anion channel subunit LRRC8C OS=Mus musculus (Mouse) OX=10090 GN=Lrrc8c PE=1 SV=1	LRRC8C	6	1	-0.190321	0.300758	0.402746	FALSE	39	30	0.374117
Q921W4	Q921W4	>sp|Q921W4|QORL1_MOUSE Quinone oxidoreductase-like protein 1 OS=Mus musculus (Mouse) OX=10090 GN=Cryzl1 PE=1 SV=1	CRYZL1	6	5	0.0399143	0.489435	0.588061	FALSE	51	41	0.292779
Q8CHG3	Q8CHG3	>sp|Q8CHG3|GCC2_MOUSE GRIP and coiled-coil domain-containing protein 2 OS=Mus musculus (Mouse) OX=10090 GN=Gcc2 PE=1 SV=2	GCC2	6	1	0.141172	0.481292	0.580338	FALSE	31	29	-0.0391841
Q2PFD7	Q2PFD7	>sp|Q2PFD7|PSD3_MOUSE PH and SEC7 domain-containing protein 3 OS=Mus musculus (Mouse) OX=10090 GN=Psd3 PE=1 SV=2	PSD3	20	17	-0.648848	7.28197e-07	5.96438e-06	TRUE	185	157	0.182756
Q91VF2	Q91VF2	>sp|Q91VF2|HNMT_MOUSE Histamine N-methyltransferase OS=Mus musculus (Mouse) OX=10090 GN=Hnmt PE=1 SV=1	HNMT	3	0					2	14	-3.42095
Q80WM4	Q80WM4	>sp|Q80WM4|HPLN4_MOUSE Hyaluronan and proteoglycan link protein 4 OS=Mus musculus (Mouse) OX=10090 GN=Hapln4 PE=2 SV=2	HAPLN4	1	1	-1.48623	2.4866e-09	5.45038e-08	TRUE	10	8	0.266117
Q9Z0P5	Q9Z0P5	>sp|Q9Z0P5|TWF2_MOUSE Twinfilin-2 OS=Mus musculus (Mouse) OX=10090 GN=Twf2 PE=1 SV=1	TWF2	7	3	-0.641532	1.84692e-06	1.31223e-05	TRUE	44	52	-0.500952
P62761	P62761	>sp|P62761|VISL1_MOUSE Visinin-like protein 1 OS=Mus musculus (Mouse) OX=10090 GN=Vsnl1 PE=1 SV=2	VSNL1	12	8	-0.674612	5.89336e-08	7.35176e-07	TRUE	94	81	0.152106
Q03173	Q03173	>sp|Q03173|ENAH_MOUSE Protein enabled homolog OS=Mus musculus (Mouse) OX=10090 GN=Enah PE=1 SV=2	ENAH	14	0					51	90	-1.31987
Q05909	Q05909	>sp|Q05909|PTPRG_MOUSE Receptor-type tyrosine-protein phosphatase gamma OS=Mus musculus (Mouse) OX=10090 GN=Ptprg PE=1 SV=1	PTPRG	11	4	-0.538523	5.39306e-05	0.000238936	TRUE	62	57	-0.0031065
Q9Z0H4	Q9Z0H4	>sp|Q9Z0H4|CELF2_MOUSE CUGBP Elav-like family member 2 OS=Mus musculus (Mouse) OX=10090 GN=Celf2 PE=1 SV=1	CELF2	7	6	-0.281443	0.00282018	0.00743713	TRUE	63	55	0.125305
P34152	P34152	>sp|P34152|FAK1_MOUSE Focal adhesion kinase 1 OS=Mus musculus (Mouse) OX=10090 GN=Ptk2 PE=1 SV=4	PTK2	16	10	-0.0552601	0.281492	0.382626	FALSE	119	113	-0.0550708
Q6NXK7;Q9Z218	Q6NXK7;Q9Z218	>sp|Q6NXK7|DPP10_MOUSE Inactive dipeptidyl peptidase 10 OS=Mus musculus (Mouse) OX=10090 GN=Dpp10 PE=1 SV=1;>sp|Q9Z218|DPP6_MOUSE Dipeptidyl aminopeptidase-like protein 6 OS=Mus musculus (Mouse) OX=10090 GN=Dpp6 PE=1 SV=1	DPP10;DPP6	2	2	-0.958753	7.92087e-10	2.15495e-08	TRUE	20	16	0.286542
Q60902	Q60902	>sp|Q60902|EP15R_MOUSE Epidermal growth factor receptor substrate 15-like 1 OS=Mus musculus (Mouse) OX=10090 GN=Eps15l1 PE=1 SV=3	EPS15L1	28	22	-0.219464	0.00134465	0.00387851	FALSE	236	206	0.122426
Q3V1B8	Q3V1B8	>tr|Q3V1B8|Q3V1B8_MOUSE Galactose-3-O-sulfotransferase 4 OS=Mus musculus (Mouse) OX=10090 GN=Gal3st4 PE=1 SV=1	GAL3ST4	1	1	-0.375537	0.0178744	0.0378607	FALSE	10	8	0.266117
Q9CQZ5	Q9CQZ5	>sp|Q9CQZ5|NDUA6_MOUSE NADH dehydrogenase [ubiquinone] 1 alpha subcomplex subunit 6 OS=Mus musculus (Mouse) OX=10090 GN=Ndufa6 PE=1 SV=1	NDUFA6	5	5	-0.307938	0.000146649	0.000565096	TRUE	50	40	0.299806
Q80TL0	Q80TL0	>sp|Q80TL0|PPM1E_MOUSE Protein phosphatase 1E OS=Mus musculus (Mouse) OX=10090 GN=Ppm1e PE=1 SV=2	PPM1E	9	4	-1.2298	1.08e-12	1.6706e-10	TRUE	50	56	-0.390897
P61021	P61021	>sp|P61021|RAB5B_MOUSE Ras-related protein Rab-5B OS=Mus musculus (Mouse) OX=10090 GN=Rab5b PE=1 SV=1	RAB5B	5	5	-0.198803	0.0406284	0.0757446	FALSE	48	40	0.207959
Q61771	Q61771	>sp|Q61771|KIF3B_MOUSE Kinesin-like protein KIF3B OS=Mus musculus (Mouse) OX=10090 GN=Kif3b PE=1 SV=1	KIF3B	13	4	0.14999	0.212166	0.304767	FALSE	87	68	0.325015
Q80X50	Q80X50	>sp|Q80X50|UBP2L_MOUSE Ubiquitin-associated protein 2-like OS=Mus musculus (Mouse) OX=10090 GN=Ubap2l PE=1 SV=1	UBAP2L	16	7	-0.787835	5.93841e-06	3.59626e-05	TRUE	111	113	-0.198123
Q8BYN5	Q8BYN5	>sp|Q8BYN5|FSD1L_MOUSE FSD1-like protein OS=Mus musculus (Mouse) OX=10090 GN=Fsd1l PE=1 SV=2	FSD1L	9	7	-0.0152334	0.833317	0.877227	FALSE	79	66	0.21112
P00405	P00405	>sp|P00405|COX2_MOUSE Cytochrome c oxidase subunit 2 OS=Mus musculus (Mouse) OX=10090 GN=Mtco2 PE=1 SV=1	MTCO2	7	4	-0.488807	5.01114e-06	3.10771e-05	TRUE	49	44	0.0675281
Q9D0J8	Q9D0J8	>sp|Q9D0J8|PTMS_MOUSE Parathymosin OS=Mus musculus (Mouse) OX=10090 GN=Ptms PE=1 SV=3	PTMS	3	1	-0.609229	0.00774972	0.0183138	FALSE	13	18	-0.783287
Q8K0T0	Q8K0T0	>sp|Q8K0T0|RTN1_MOUSE Reticulon-1 OS=Mus musculus (Mouse) OX=10090 GN=Rtn1 PE=1 SV=1	RTN1	22	13	-0.724524	3.23334e-07	3.04228e-06	TRUE	150	146	-0.100349
P11438	P11438	>sp|P11438|LAMP1_MOUSE Lysosome-associated membrane glycoprotein 1 OS=Mus musculus (Mouse) OX=10090 GN=Lamp1 PE=1 SV=2	LAMP1	8	5	-0.753275	5.46271e-09	1.01285e-07	TRUE	55	53	-0.0865493
O88998	O88998	>sp|O88998|NOE1_MOUSE Noelin OS=Mus musculus (Mouse) OX=10090 GN=Olfm1 PE=1 SV=1	OLFM1	7	3	-1.33264	5.09778e-12	4.92846e-10	TRUE	44	53	-0.533752
O55003	O55003	>sp|O55003|BNIP3_MOUSE BCL2/adenovirus E1B 19 kDa protein-interacting protein 3 OS=Mus musculus (Mouse) OX=10090 GN=Bnip3 PE=1 SV=1	BNIP3	3	1	0.284833	0.0768387	0.130042	FALSE	23	12	1.10922
Q91VX2	Q91VX2	>sp|Q91VX2|UBAP2_MOUSE Ubiquitin-associated protein 2 OS=Mus musculus (Mouse) OX=10090 GN=Ubap2 PE=1 SV=1	UBAP2	4	0					2	22	-4.40004
Q9QZ73	Q9QZ73	>sp|Q9QZ73|DCNL1_MOUSE DCN1-like protein 1 OS=Mus musculus (Mouse) OX=10090 GN=Dcun1d1 PE=2 SV=1	DCUN1D1	5	5	-0.270636	0.00533644	0.0131303	FALSE	45	39	0.12361
Q61686	Q61686	>sp|Q61686|CBX5_MOUSE Chromobox protein homolog 5 OS=Mus musculus (Mouse) OX=10090 GN=Cbx5 PE=1 SV=1	CBX5	6	1	0.100106	0.552139	0.644798	FALSE	48	24	1.25437
Q8K400	Q8K400	>sp|Q8K400|STXB5_MOUSE Syntaxin-binding protein 5 OS=Mus musculus (Mouse) OX=10090 GN=Stxbp5 PE=1 SV=3	STXBP5	16	13	0.0338202	0.488081	0.586948	FALSE	137	122	0.075641
O88325	O88325	>tr|O88325|O88325_MOUSE Alpha-N-acetylglucosaminidase OS=Mus musculus (Mouse) OX=10090 GN=Naglu PE=1 SV=1	NAGLU	13	2	-0.624487	5.73871e-06	3.4988e-05	TRUE	63	74	-0.516053
Q8BJI1	Q8BJI1	>sp|Q8BJI1|S6A17_MOUSE Sodium-dependent neutral amino acid transporter SLC6A17 OS=Mus musculus (Mouse) OX=10090 GN=Slc6a17 PE=1 SV=1	SLC6A17	14	12	0.0560002	0.436527	0.540163	FALSE	133	107	0.293892
Q4VC33	Q4VC33	>sp|Q4VC33|MAEA_MOUSE E3 ubiquitin-protein transferase MAEA OS=Mus musculus (Mouse) OX=10090 GN=Maea PE=1 SV=1	MAEA	3	2	-0.244229	0.0238334	0.048237	FALSE	19	19	-0.154415
Q9QWK5	Q9QWK5	>sp|Q9QWK5|BIR1A_MOUSE Baculoviral IAP repeat-containing protein 1a OS=Mus musculus (Mouse) OX=10090 GN=Naip1 PE=2 SV=3	NAIP1	1	0					7	6	0.117788
O70310	O70310	>sp|O70310|NMT1_MOUSE Glycylpeptide N-tetradecanoyltransferase 1 OS=Mus musculus (Mouse) OX=10090 GN=Nmt1 PE=1 SV=1	NMT1	9	5	0.0596779	0.375241	0.479782	FALSE	71	62	0.103353
Q9QYR6	Q9QYR6	>sp|Q9QYR6|MAP1A_MOUSE Microtubule-associated protein 1A OS=Mus musculus (Mouse) OX=10090 GN=Map1a PE=1 SV=2	MAP1A	22	7	-0.655136	5.33506e-08	6.78573e-07	TRUE	119	129	-0.338015
Q8BHL5	Q8BHL5	>sp|Q8BHL5|ELMO2_MOUSE Engulfment and cell motility protein 2 OS=Mus musculus (Mouse) OX=10090 GN=Elmo2 PE=1 SV=1	ELMO2	15	13	-0.124582	0.0509565	0.0913808	FALSE	137	109	0.307877
Q3U1N2	Q3U1N2	>sp|Q3U1N2|SRBP2_MOUSE Sterol regulatory element-binding protein 2 OS=Mus musculus (Mouse) OX=10090 GN=Srebf2 PE=1 SV=2	SREBF2	1	1	-0.911467	0.000238746	0.000864019	TRUE	8	6	0.364948
E9Q166	E9Q166	>tr|E9Q166|E9Q166_MOUSE Bromo domain-containing protein OS=Mus musculus (Mouse) OX=10090 GN=Atad2b PE=1 SV=1	ATAD2B	1	0					3	7	-1.63428
P08551;P08553;P19246;P46660	P08551;P08553;P19246;P46660	>sp|P08551|NFL_MOUSE Neurofilament light polypeptide OS=Mus musculus (Mouse) OX=10090 GN=Nefl PE=1 SV=5;>sp|P08553|NFM_MOUSE Neurofilament medium polypeptide OS=Mus musculus (Mouse) OX=10090 GN=Nefm PE=1 SV=4;>sp|P19246|NFH_MOUSE Neurofilament heavy polypeptide OS=Mus musculus (Mouse) OX=10090 GN=Nefh PE=1 SV=3;>sp|P46660|AINX_MOUSE Alpha-internexin OS=Mus musculus (Mouse) OX=10090 GN=Ina PE=1 SV…	NEFL;NEFM;NEFH;INA	2	1	-2.80427	2.45616e-10	8.80639e-09	TRUE	10	13	-0.634708
O88952;Q8JZS0	O88952;Q8JZS0	>sp|O88952|LIN7C_MOUSE Protein lin-7 homolog C OS=Mus musculus (Mouse) OX=10090 GN=Lin7c PE=1 SV=2;>sp|Q8JZS0|LIN7A_MOUSE Protein lin-7 homolog A OS=Mus musculus (Mouse) OX=10090 GN=Lin7a PE=1 SV=2	LIN7C;LIN7A	2	1	-0.686391	1.02968e-06	7.99909e-06	TRUE	14	12	0.155782
P16388;P16390;P63141;Q61423;Q61923	P16388;P16390;P63141;Q61423;Q61923	>sp|P16388|KCNA1_MOUSE Potassium voltage-gated channel subfamily A member 1 OS=Mus musculus (Mouse) OX=10090 GN=Kcna1 PE=1 SV=1;>sp|P16390|KCNA3_MOUSE Potassium voltage-gated channel subfamily A member 3 OS=Mus musculus (Mouse) OX=10090 GN=Kcna3 PE=1 SV=3;>sp|P63141|KCNA2_MOUSE Potassium voltage-gated channel subfamily A member 2 OS=Mus musculus (Mouse) OX=10090 GN=Kcna2 PE=1 SV=1;>sp|Q61423|KCNA…	KCNA1;KCNA3;KCNA2;KCNA4;KCNA6	1	1	0.0618958	0.777273	0.831158	FALSE	10	8	0.266117
P05532	P05532	>sp|P05532|KIT_MOUSE Mast/stem cell growth factor receptor Kit OS=Mus musculus (Mouse) OX=10090 GN=Kit PE=1 SV=3	KIT	12	4	0.13091	0.12274	0.192724	FALSE	79	73	0.000302971
Q9CRC9	Q9CRC9	>sp|Q9CRC9|GNPI2_MOUSE Glucosamine-6-phosphate isomerase 2 OS=Mus musculus (Mouse) OX=10090 GN=Gnpda2 PE=1 SV=1	GNPDA2	5	2	-0.194822	0.112071	0.178824	FALSE	29	26	0.0683625
G5E8V9	G5E8V9	>tr|G5E8V9|G5E8V9_MOUSE AH domain-containing protein OS=Mus musculus (Mouse) OX=10090 GN=Arfip1 PE=1 SV=1	ARFIP1	6	2	-0.8339	5.88371e-06	3.56756e-05	TRUE	39	45	-0.460334
Q6DFV3	Q6DFV3	>sp|Q6DFV3|RHG21_MOUSE Rho GTPase-activating protein 21 OS=Mus musculus (Mouse) OX=10090 GN=Arhgap21 PE=1 SV=1	ARHGAP21	9	0					46	58	-0.607117
P12787	P12787	>sp|P12787|COX5A_MOUSE Cytochrome c oxidase subunit 5A, mitochondrial OS=Mus musculus (Mouse) OX=10090 GN=Cox5a PE=1 SV=2	COX5A	6	5	-0.373	0.00283669	0.00747703	TRUE	53	43	0.271213
Q6PE13	Q6PE13	>sp|Q6PE13|PRRT3_MOUSE Proline-rich transmembrane protein 3 OS=Mus musculus (Mouse) OX=10090 GN=Prrt3 PE=1 SV=1	PRRT3	5	1	-0.952242	0.000207707	0.000766024	TRUE	23	30	-0.672445
Q05816	Q05816	>sp|Q05816|FABP5_MOUSE Fatty acid-binding protein 5 OS=Mus musculus (Mouse) OX=10090 GN=Fabp5 PE=1 SV=3	FABP5	6	4	-0.954506	4.57973e-07	4.07807e-06	TRUE	45	42	-0.0186317
Q9CQH7	Q9CQH7	>sp|Q9CQH7|BT3L4_MOUSE Transcription factor BTF3 homolog 4 OS=Mus musculus (Mouse) OX=10090 GN=Btf3l4 PE=1 SV=1	BTF3L4	6	4	0.0103636	0.936412	0.952779	FALSE	45	39	0.122857
Q5SSZ5	Q5SSZ5	>sp|Q5SSZ5|TENS3_MOUSE Tensin-3 OS=Mus musculus (Mouse) OX=10090 GN=Tns3 PE=1 SV=1	TNS3	3	0					3	14	-2.83305
Q9QYG0	Q9QYG0	>sp|Q9QYG0|NDRG2_MOUSE Protein NDRG2 OS=Mus musculus (Mouse) OX=10090 GN=Ndrg2 PE=1 SV=1	NDRG2	10	7	-0.980545	1.07455e-06	8.24026e-06	TRUE	76	67	0.0978897
Q3UHJ0	Q3UHJ0	>sp|Q3UHJ0|AAK1_MOUSE AP2-associated protein kinase 1 OS=Mus musculus (Mouse) OX=10090 GN=Aak1 PE=1 SV=2	AAK1	23	14	-1.24495	2.46374e-12	2.92275e-10	TRUE	180	181	-0.165521
Q9QWI6	Q9QWI6	>sp|Q9QWI6|SRCN1_MOUSE SRC kinase signaling inhibitor 1 OS=Mus musculus (Mouse) OX=10090 GN=Srcin1 PE=1 SV=2	SRCIN1	42	31	-0.507458	2.04852e-06	1.42554e-05	TRUE	350	310	0.0940811
P08553	P08553	>sp|P08553|NFM_MOUSE Neurofilament medium polypeptide OS=Mus musculus (Mouse) OX=10090 GN=Nefm PE=1 SV=4	NEFM	26	6	-2.72337	1.22496e-15	1.69745e-12	TRUE	116	206	-1.34659
P62137;P63087	P62137;P63087	>sp|P62137|PP1A_MOUSE Serine/threonine-protein phosphatase PP1-alpha catalytic subunit OS=Mus musculus (Mouse) OX=10090 GN=Ppp1ca PE=1 SV=1;>sp|P63087|PP1G_MOUSE Serine/threonine-protein phosphatase PP1-gamma catalytic subunit OS=Mus musculus (Mouse) OX=10090 GN=Ppp1cc PE=1 SV=1	PPP1CA;PPP1CC	1	1	-0.415276	0.00497775	0.0123114	FALSE	10	8	0.266117
Q9CPT3	Q9CPT3	>sp|Q9CPT3|NANP_MOUSE N-acylneuraminate-9-phosphatase OS=Mus musculus (Mouse) OX=10090 GN=Nanp PE=1 SV=1	NANP	4	1	0.166715	0.416315	0.52102	FALSE	26	24	-0.0460706
Q9D7X3	Q9D7X3	>sp|Q9D7X3|DUS3_MOUSE Dual specificity protein phosphatase 3 OS=Mus musculus (Mouse) OX=10090 GN=Dusp3 PE=1 SV=1	DUSP3	4	4	-1.4353	6.01572e-11	2.90796e-09	TRUE	40	32	0.297538
Q60649	Q60649	>sp|Q60649|CLPB_MOUSE Caseinolytic peptidase B protein homolog OS=Mus musculus (Mouse) OX=10090 GN=Clpb PE=1 SV=1	CLPB	11	7	-0.168753	0.0855303	0.142	FALSE	84	70	0.214928
P97821	P97821	>sp|P97821|CATC_MOUSE Dipeptidyl peptidase 1 OS=Mus musculus (Mouse) OX=10090 GN=Ctsc PE=1 SV=1	CTSC	1	0					7	8	-0.41311
Q9R062	Q9R062	>sp|Q9R062|GLYG_MOUSE Glycogenin-1 OS=Mus musculus (Mouse) OX=10090 GN=Gyg1 PE=1 SV=3	GYG1	2	1	0.204751	0.37989	0.484391	FALSE	15	15	-0.175071
P53810;P53811	P53810;P53811	>sp|P53810|PIPNA_MOUSE Phosphatidylinositol transfer protein alpha isoform OS=Mus musculus (Mouse) OX=10090 GN=Pitpna PE=1 SV=2;>sp|P53811|PIPNB_MOUSE Phosphatidylinositol transfer protein beta isoform OS=Mus musculus (Mouse) OX=10090 GN=Pitpnb PE=1 SV=2	PITPNA;PITPNB	1	1	-0.499976	0.000826936	0.00255392	TRUE	10	8	0.266117
P60469	P60469	>sp|P60469|LIPA3_MOUSE Liprin-alpha-3 OS=Mus musculus (Mouse) OX=10090 GN=Ppfia3 PE=1 SV=2	PPFIA3	33	27	-0.0887316	0.196897	0.286328	FALSE	281	240	0.172543
Q62413	Q62413	>sp|Q62413|EPHA6_MOUSE Ephrin type-A receptor 6 OS=Mus musculus (Mouse) OX=10090 GN=Epha6 PE=1 SV=2	EPHA6	3	0					6	16	-2.06357
Q811S7;Q9ERA0	Q811S7;Q9ERA0	>sp|Q811S7|UBIP1_MOUSE Upstream-binding protein 1 OS=Mus musculus (Mouse) OX=10090 GN=Ubp1 PE=1 SV=1;>sp|Q9ERA0|TFCP2_MOUSE Alpha-globin transcription factor CP2 OS=Mus musculus (Mouse) OX=10090 GN=Tfcp2 PE=1 SV=1	UBP1;TFCP2	1	1	-0.18433	0.234714	0.330148	FALSE	9	7	0.315839
Q91VI7	Q91VI7	>sp|Q91VI7|RINI_MOUSE Ribonuclease inhibitor OS=Mus musculus (Mouse) OX=10090 GN=Rnh1 PE=1 SV=1	RNH1	8	7	0.418223	3.83058e-05	0.000177947	TRUE	74	58	0.349819
O08967	O08967	>sp|O08967|CYH3_MOUSE Cytohesin-3 OS=Mus musculus (Mouse) OX=10090 GN=Cyth3 PE=1 SV=1	CYTH3	3	0					8	18	-1.7182
Q91Y86	Q91Y86	>sp|Q91Y86|MK08_MOUSE Mitogen-activated protein kinase 8 OS=Mus musculus (Mouse) OX=10090 GN=Mapk8 PE=1 SV=1	MAPK8	6	4	-0.118798	0.240311	0.336438	FALSE	44	36	0.251172
P68134	P68134	>sp|P68134|ACTS_MOUSE Actin, alpha skeletal muscle OS=Mus musculus (Mouse) OX=10090 GN=Acta1 PE=1 SV=1	ACTA1	4	2	-0.36742	0.0432239	0.0797826	FALSE	27	24	0.0852572
Q64322	Q64322	>sp|Q64322|NPDC1_MOUSE Neural proliferation differentiation and control protein 1 OS=Mus musculus (Mouse) OX=10090 GN=Npdc1 PE=2 SV=2	NPDC1	4	2	-0.687557	0.000137746	0.000535362	TRUE	26	29	-0.385756
P39053;P39054;Q8BZ98	P39053;P39054;Q8BZ98	>sp|P39053|DYN1_MOUSE Dynamin-1 OS=Mus musculus (Mouse) OX=10090 GN=Dnm1 PE=1 SV=2;>sp|P39054|DYN2_MOUSE Dynamin-2 OS=Mus musculus (Mouse) OX=10090 GN=Dnm2 PE=1 SV=2;>sp|Q8BZ98|DYN3_MOUSE Dynamin-3 OS=Mus musculus (Mouse) OX=10090 GN=Dnm3 PE=1 SV=1	DNM1;DNM2;DNM3	6	5	-0.496545	6.30826e-05	0.000271702	TRUE	53	45	0.180059
Q80XU8	Q80XU8	>sp|Q80XU8|LRFN4_MOUSE Leucine-rich repeat and fibronectin type-III domain-containing protein 4 OS=Mus musculus (Mouse) OX=10090 GN=Lrfn4 PE=1 SV=1	LRFN4	6	4	-0.348408	0.00668917	0.0160457	FALSE	43	42	-0.110287
Q8R255	Q8R255	>tr|Q8R255|Q8R255_MOUSE Vomeronasal type-1 receptor OS=Mus musculus (Mouse) OX=10090 GN=Vmn1r87 PE=3 SV=1	VMN1R87	1	0					5	7	-0.733601
P20444	P20444	>sp|P20444|KPCA_MOUSE Protein kinase C alpha type OS=Mus musculus (Mouse) OX=10090 GN=Prkca PE=1 SV=3	PRKCA	8	4	-0.357416	4.59837e-05	0.000207983	TRUE	59	54	0.0149109
P63001	P63001	>sp|P63001|RAC1_MOUSE Ras-related C3 botulinum toxin substrate 1 OS=Mus musculus (Mouse) OX=10090 GN=Rac1 PE=1 SV=1	RAC1	3	2	-0.217263	0.0655609	0.113402	FALSE	24	19	0.313723
P84096	P84096	>sp|P84096|RHOG_MOUSE Rho-related GTP-binding protein RhoG OS=Mus musculus (Mouse) OX=10090 GN=Rhog PE=1 SV=1	RHOG	6	1	-0.913123	6.41844e-05	0.000275772	TRUE	26	34	-0.70268
Q8VD04	Q8VD04	>sp|Q8VD04|GRAP1_MOUSE GRIP1-associated protein 1 OS=Mus musculus (Mouse) OX=10090 GN=Gripap1 PE=1 SV=1	GRIPAP1	17	12	-0.100769	0.20555	0.296918	FALSE	142	121	0.178327
P31786	P31786	>sp|P31786|ACBP_MOUSE Acyl-CoA-binding protein OS=Mus musculus (Mouse) OX=10090 GN=Dbi PE=1 SV=2	DBI	4	2	-1.69837	1.11202e-06	8.49149e-06	TRUE	24	25	-0.240439
Q8BIJ7	Q8BIJ7	>sp|Q8BIJ7|RUFY1_MOUSE RUN and FYVE domain-containing protein 1 OS=Mus musculus (Mouse) OX=10090 GN=Rufy1 PE=1 SV=1	RUFY1	3	1	-0.371856	0.0112267	0.0252834	FALSE	27	17	0.77291
O35295;Q8R4E6	O35295;Q8R4E6	>sp|O35295|PURB_MOUSE Transcriptional activator protein Pur-beta OS=Mus musculus (Mouse) OX=10090 GN=Purb PE=1 SV=3;>sp|Q8R4E6|PURG_MOUSE Purine-rich element-binding protein gamma OS=Mus musculus (Mouse) OX=10090 GN=Purg PE=1 SV=1	PURB;PURG	1	1	-0.0439073	0.809773	0.858116	FALSE	10	8	0.266117
Q8R3V5	Q8R3V5	>sp|Q8R3V5|SHLB2_MOUSE Endophilin-B2 OS=Mus musculus (Mouse) OX=10090 GN=Sh3glb2 PE=1 SV=2	SH3GLB2	11	8	-0.644614	1.24778e-09	3.17159e-08	TRUE	85	74	0.133353
Q91WB7	Q91WB7	>sp|Q91WB7|UBTD1_MOUSE Ubiquitin domain-containing protein 1 OS=Mus musculus (Mouse) OX=10090 GN=Ubtd1 PE=2 SV=1	UBTD1	2	1	-0.0403005	0.832017	0.87637	FALSE	15	12	0.280549
Q80TM6	Q80TM6	>sp|Q80TM6|R3HD2_MOUSE R3H domain-containing protein 2 OS=Mus musculus (Mouse) OX=10090 GN=R3hdm2 PE=1 SV=2	R3HDM2	4	0					16	26	-1.09556
Q80TR4	Q80TR4	>sp|Q80TR4|SLIT1_MOUSE Slit homolog 1 protein OS=Mus musculus (Mouse) OX=10090 GN=Slit1 PE=1 SV=2	SLIT1	21	8	0.212365	0.321459	0.424276	FALSE	135	100	0.447807
P39087	P39087	>sp|P39087|GRIK2_MOUSE Glutamate receptor ionotropic, kainate 2 OS=Mus musculus (Mouse) OX=10090 GN=Grik2 PE=1 SV=4	GRIK2	7	1	-0.0475961	0.767327	0.823287	FALSE	40	36	0.0454197
Q9CZX8	Q9CZX8	>sp|Q9CZX8|RS19_MOUSE 40S ribosomal protein S19 OS=Mus musculus (Mouse) OX=10090 GN=Rps19 PE=1 SV=3	RPS19	8	7	-0.250671	0.00254129	0.00680106	FALSE	76	63	0.227
Q7TMS5	Q7TMS5	>sp|Q7TMS5|ABCG2_MOUSE Broad substrate specificity ATP-binding cassette transporter ABCG2 OS=Mus musculus (Mouse) OX=10090 GN=Abcg2 PE=1 SV=1	ABCG2	3	2	0.129538	0.324596	0.42791	FALSE	19	20	-0.286408
Q7TSS2	Q7TSS2	>sp|Q7TSS2|UB2Q1_MOUSE Ubiquitin-conjugating enzyme E2 Q1 OS=Mus musculus (Mouse) OX=10090 GN=Ube2q1 PE=1 SV=2	UBE2Q1	4	4	-0.269454	0.0102616	0.0234712	FALSE	36	29	0.261811
Q6P8X1;Q80ZJ7	Q6P8X1;Q80ZJ7	>sp|Q6P8X1|SNX6_MOUSE Sorting nexin-6 OS=Mus musculus (Mouse) OX=10090 GN=Snx6 PE=1 SV=2;>sp|Q80ZJ7|SNX32_MOUSE Sorting nexin-32 OS=Mus musculus (Mouse) OX=10090 GN=Snx32 PE=2 SV=1	SNX6;SNX32	2	2	0.129353	0.409387	0.514132	FALSE	17	14	0.230881
Q7TT15	Q7TT15	>sp|Q7TT15|GLT17_MOUSE Polypeptide N-acetylgalactosaminyltransferase 17 OS=Mus musculus (Mouse) OX=10090 GN=Galnt17 PE=1 SV=1	GALNT17	8	5	0.45496	3.38184e-06	2.21839e-05	TRUE	64	49	0.378634
P19783	P19783	>sp|P19783|COX41_MOUSE Cytochrome c oxidase subunit 4 isoform 1, mitochondrial OS=Mus musculus (Mouse) OX=10090 GN=Cox4i1 PE=1 SV=2	COX4I1	13	11	-0.390037	5.43216e-05	0.000240275	TRUE	114	98	0.157136
Q06138;Q9DB16	Q06138;Q9DB16	>sp|Q06138|CAB39_MOUSE Calcium-binding protein 39 OS=Mus musculus (Mouse) OX=10090 GN=Cab39 PE=1 SV=2;>sp|Q9DB16|CB39L_MOUSE Calcium-binding protein 39-like OS=Mus musculus (Mouse) OX=10090 GN=Cab39l PE=1 SV=3	CAB39;CAB39L	2	2	-0.410153	0.000425228	0.00142693	TRUE	17	15	0.100134
Q9DAT5	Q9DAT5	>sp|Q9DAT5|MTU1_MOUSE Mitochondrial tRNA-specific 2-thiouridylase 1 OS=Mus musculus (Mouse) OX=10090 GN=Trmu PE=1 SV=1	TRMU	8	3	0.235127	0.00591829	0.0144267	FALSE	49	34	0.591783
P69566	P69566	>sp|P69566|RANB9_MOUSE Ran-binding protein 9 OS=Mus musculus (Mouse) OX=10090 GN=Ranbp9 PE=1 SV=1	RANBP9	8	7	-0.0306544	0.611896	0.696699	FALSE	72	64	0.085263
D3YVF0	D3YVF0	>sp|D3YVF0|AKAP5_MOUSE A-kinase anchor protein 5 OS=Mus musculus (Mouse) OX=10090 GN=Akap5 PE=1 SV=2	AKAP5	15	9	-0.432897	0.00202944	0.00557169	TRUE	110	98	0.0790197
Q8BTU1	Q8BTU1	>sp|Q8BTU1|CFA20_MOUSE Cilia- and flagella-associated protein 20 OS=Mus musculus (Mouse) OX=10090 GN=Cfap20 PE=1 SV=1	CFAP20	5	4	0.238488	0.00175593	0.00490032	FALSE	46	39	0.17427
Q9D1K2	Q9D1K2	>sp|Q9D1K2|VATF_MOUSE V-type proton ATPase subunit F OS=Mus musculus (Mouse) OX=10090 GN=Atp6v1f PE=1 SV=2	ATP6V1F	7	4	0.0441876	0.716097	0.783003	FALSE	59	52	0.109593
Q9CQ22	Q9CQ22	>sp|Q9CQ22|LTOR1_MOUSE Ragulator complex protein LAMTOR1 OS=Mus musculus (Mouse) OX=10090 GN=Lamtor1 PE=1 SV=1	LAMTOR1	5	4	-0.466414	1.87953e-06	1.3267e-05	TRUE	44	39	0.0842726
Q8BWW4	Q8BWW4	>sp|Q8BWW4|LARP4_MOUSE La-related protein 4 OS=Mus musculus (Mouse) OX=10090 GN=Larp4 PE=1 SV=2	LARP4	4	1	-0.123552	0.449825	0.552216	FALSE	21	31	-0.954216
Q9JM76	Q9JM76	>sp|Q9JM76|ARPC3_MOUSE Actin-related protein 2/3 complex subunit 3 OS=Mus musculus (Mouse) OX=10090 GN=Arpc3 PE=1 SV=3	ARPC3	7	5	-0.932362	1.74585e-10	6.51863e-09	TRUE	55	49	0.0802689
Q8BTG3	Q8BTG3	>sp|Q8BTG3|T11L1_MOUSE T-complex protein 11-like protein 1 OS=Mus musculus (Mouse) OX=10090 GN=Tcp11l1 PE=1 SV=1	TCP11L1	5	2	-0.210885	0.040031	0.074837	FALSE	29	25	0.1339
Q9CPU0	Q9CPU0	>sp|Q9CPU0|LGUL_MOUSE Lactoylglutathione lyase OS=Mus musculus (Mouse) OX=10090 GN=Glo1 PE=1 SV=3	GLO1	11	5	-0.69356	7.48373e-08	8.90482e-07	TRUE	65	68	-0.254927
Q80U23;Q8BHS8	Q80U23;Q8BHS8	>sp|Q80U23|SNPH_MOUSE Syntaphilin OS=Mus musculus (Mouse) OX=10090 GN=Snph PE=1 SV=3;>sp|Q8BHS8|SYBU_MOUSE Syntabulin OS=Mus musculus (Mouse) OX=10090 GN=Sybu PE=1 SV=1	SNPH;SYBU	2	2	-0.989755	1.25481e-08	2.00992e-07	TRUE	20	16	0.286542
Q9CY57	Q9CY57	>sp|Q9CY57|CHTOP_MOUSE Chromatin target of PRMT1 protein OS=Mus musculus (Mouse) OX=10090 GN=Chtop PE=1 SV=2	CHTOP	4	3	0.02231	0.912034	0.936066	FALSE	30	28	-0.022684
Q76MZ3;Q7TNP2	Q76MZ3;Q7TNP2	>sp|Q76MZ3|2AAA_MOUSE Serine/threonine-protein phosphatase 2A 65 kDa regulatory subunit A alpha isoform OS=Mus musculus (Mouse) OX=10090 GN=Ppp2r1a PE=1 SV=3;>sp|Q7TNP2|2AAB_MOUSE Serine/threonine-protein phosphatase 2A 65 kDa regulatory subunit A beta isoform OS=Mus musculus (Mouse) OX=10090 GN=Ppp2r1b PE=1 SV=2	PPP2R1A;PPP2R1B	4	4	-0.407414	0.00202472	0.00556382	TRUE	38	31	0.251323
P61089	P61089	>sp|P61089|UBE2N_MOUSE Ubiquitin-conjugating enzyme E2 N OS=Mus musculus (Mouse) OX=10090 GN=Ube2n PE=1 SV=1	UBE2N	6	6	-0.557689	1.10001e-07	1.21841e-06	TRUE	60	48	0.30133
P84091	P84091	>sp|P84091|AP2M1_MOUSE AP-2 complex subunit mu OS=Mus musculus (Mouse) OX=10090 GN=Ap2m1 PE=1 SV=1	AP2M1	20	17	-0.0311575	0.479973	0.579134	FALSE	186	155	0.220988
D3Z7P3	D3Z7P3	>sp|D3Z7P3|GLSK_MOUSE Glutaminase kidney isoform, mitochondrial OS=Mus musculus (Mouse) OX=10090 GN=Gls PE=1 SV=1	GLS	29	19	0.177276	0.00971588	0.0223647	FALSE	235	188	0.304327
Q60899	Q60899	>sp|Q60899|ELAV2_MOUSE ELAV-like protein 2 OS=Mus musculus (Mouse) OX=10090 GN=Elavl2 PE=1 SV=1	ELAVL2	6	6	-0.171434	0.178359	0.263979	FALSE	58	45	0.366846
Q9JL26	Q9JL26	>sp|Q9JL26|FMNL1_MOUSE Formin-like protein 1 OS=Mus musculus (Mouse) OX=10090 GN=Fmnl1 PE=1 SV=1	FMNL1	4	2	-0.0685687	0.563628	0.655106	FALSE	29	24	0.223217
P60521	P60521	>sp|P60521|GBRL2_MOUSE Gamma-aminobutyric acid receptor-associated protein-like 2 OS=Mus musculus (Mouse) OX=10090 GN=Gabarapl2 PE=1 SV=1	GABARAPL2	6	5	-0.339896	0.000407454	0.001377	TRUE	57	46	0.280854
O70400	O70400	>sp|O70400|PDLI1_MOUSE PDZ and LIM domain protein 1 OS=Mus musculus (Mouse) OX=10090 GN=Pdlim1 PE=1 SV=4	PDLIM1	3	0					14	21	-0.908233
E9Q9D8	E9Q9D8	>tr|E9Q9D8|E9Q9D8_MOUSE ANK_REP_REGION domain-containing protein OS=Mus musculus (Mouse) OX=10090 GN=Ankrd35 PE=1 SV=1	ANKRD35	1	1	0.123847	0.397214	0.502222	FALSE	10	8	0.266117
Q5SNZ0	Q5SNZ0	>sp|Q5SNZ0|GRDN_MOUSE Girdin OS=Mus musculus (Mouse) OX=10090 GN=Ccdc88a PE=1 SV=2	CCDC88A	7	2	-0.274385	0.095457	0.155852	FALSE	39	31	0.291392
Q8K4I3;Q9ES28	Q8K4I3;Q9ES28	>sp|Q8K4I3|ARHG6_MOUSE Rho guanine nucleotide exchange factor 6 OS=Mus musculus (Mouse) OX=10090 GN=Arhgef6 PE=1 SV=1;>sp|Q9ES28|ARHG7_MOUSE Rho guanine nucleotide exchange factor 7 OS=Mus musculus (Mouse) OX=10090 GN=Arhgef7 PE=1 SV=2	ARHGEF6;ARHGEF7	2	2	-0.681824	5.1814e-06	3.20596e-05	TRUE	20	16	0.286542
Q811D0	Q811D0	>sp|Q811D0|DLG1_MOUSE Disks large homolog 1 OS=Mus musculus (Mouse) OX=10090 GN=Dlg1 PE=1 SV=1	DLG1	18	9	-0.0634682	0.317084	0.419524	FALSE	123	114	0.00198949
Q64332	Q64332	>sp|Q64332|SYN2_MOUSE Synapsin-2 OS=Mus musculus (Mouse) OX=10090 GN=Syn2 PE=1 SV=2	SYN2	20	16	-0.138045	0.296072	0.397652	FALSE	177	143	0.284071
Q9CQW2	Q9CQW2	>sp|Q9CQW2|ARL8B_MOUSE ADP-ribosylation factor-like protein 8B OS=Mus musculus (Mouse) OX=10090 GN=Arl8b PE=1 SV=1	ARL8B	8	6	0.0256054	0.732358	0.795702	FALSE	65	55	0.191059
P97855	P97855	>sp|P97855|G3BP1_MOUSE Ras GTPase-activating protein-binding protein 1 OS=Mus musculus (Mouse) OX=10090 GN=G3bp1 PE=1 SV=1	G3BP1	11	10	-0.470579	1.47145e-05	7.77496e-05	TRUE	101	85	0.200718
Q99JY9	Q99JY9	>sp|Q99JY9|ARP3_MOUSE Actin-related protein 3 OS=Mus musculus (Mouse) OX=10090 GN=Actr3 PE=1 SV=3	ACTR3	11	9	-0.508476	3.99318e-09	8.03683e-08	TRUE	96	84	0.122267
Q63912	Q63912	>sp|Q63912|OMGP_MOUSE Oligodendrocyte-myelin glycoprotein OS=Mus musculus (Mouse) OX=10090 GN=Omg PE=1 SV=1	OMG	5	2	-1.21447	3.68991e-12	3.76928e-10	TRUE	32	38	-0.51506
Q9CZT8	Q9CZT8	>sp|Q9CZT8|RAB3B_MOUSE Ras-related protein Rab-3B OS=Mus musculus (Mouse) OX=10090 GN=Rab3b PE=1 SV=1	RAB3B	5	2	-0.536642	0.00031066	0.00108791	TRUE	35	27	0.364546
Q9JIH2	Q9JIH2	>sp|Q9JIH2|NUP50_MOUSE Nuclear pore complex protein Nup50 OS=Mus musculus (Mouse) OX=10090 GN=Nup50 PE=1 SV=3	NUP50	3	1	-0.28231	0.111043	0.177393	FALSE	19	18	-0.0368704
Q8VE11	Q8VE11	>sp|Q8VE11|MTMR6_MOUSE Myotubularin-related protein 6 OS=Mus musculus (Mouse) OX=10090 GN=Mtmr6 PE=1 SV=1	MTMR6	8	5	-0.194154	0.0231017	0.0471082	FALSE	64	58	0.0451659
O70250;Q9DBJ1	O70250;Q9DBJ1	>sp|O70250|PGAM2_MOUSE Phosphoglycerate mutase 2 OS=Mus musculus (Mouse) OX=10090 GN=Pgam2 PE=1 SV=3;>sp|Q9DBJ1|PGAM1_MOUSE Phosphoglycerate mutase 1 OS=Mus musculus (Mouse) OX=10090 GN=Pgam1 PE=1 SV=3	PGAM2;PGAM1	2	2	-0.383412	0.000193367	0.000718031	TRUE	20	16	0.286542
Q9DC51	Q9DC51	>sp|Q9DC51|GNAI3_MOUSE Guanine nucleotide-binding protein G(i) subunit alpha OS=Mus musculus (Mouse) OX=10090 GN=Gnai3 PE=1 SV=3	GNAI3	5	4	0.514112	8.35887e-08	9.77428e-07	TRUE	47	36	0.392569
O88342	O88342	>sp|O88342|WDR1_MOUSE WD repeat-containing protein 1 OS=Mus musculus (Mouse) OX=10090 GN=Wdr1 PE=1 SV=3	WDR1	22	20	-0.741436	1.32353e-12	1.88568e-10	TRUE	205	172	0.20368
P49138	P49138	>sp|P49138|MAPK2_MOUSE MAP kinase-activated protein kinase 2 OS=Mus musculus (Mouse) OX=10090 GN=Mapkapk2 PE=1 SV=2	MAPKAPK2	1	0					6	6	-0.18821
P97765	P97765	>sp|P97765|WBP2_MOUSE WW domain-binding protein 2 OS=Mus musculus (Mouse) OX=10090 GN=Wbp2 PE=1 SV=1	WBP2	6	6	-0.279566	0.00591448	0.0144239	FALSE	60	48	0.30133
P39053	P39053	>sp|P39053|DYN1_MOUSE Dynamin-1 OS=Mus musculus (Mouse) OX=10090 GN=Dnm1 PE=1 SV=2	DNM1	34	30	-0.554406	3.04262e-07	2.88995e-06	TRUE	309	259	0.212156
Q3UMR5	Q3UMR5	>sp|Q3UMR5|MCU_MOUSE Calcium uniporter protein, mitochondrial OS=Mus musculus (Mouse) OX=10090 GN=Mcu PE=1 SV=2	MCU	13	12	-0.139854	0.019962	0.0416792	FALSE	121	99	0.259799
Q9CQQ8	Q9CQQ8	>sp|Q9CQQ8|LSM7_MOUSE U6 snRNA-associated Sm-like protein LSm7 OS=Mus musculus (Mouse) OX=10090 GN=Lsm7 PE=1 SV=1	LSM7	1	1	0.129373	0.338899	0.442761	FALSE	9	7	0.297839
Q9CQ86	Q9CQ86	>sp|Q9CQ86|MIEN1_MOUSE Migration and invasion enhancer 1 OS=Mus musculus (Mouse) OX=10090 GN=Mien1 PE=1 SV=1	MIEN1	1	1	-0.194183	0.11512	0.182614	FALSE	10	8	0.266117
O88746	O88746	>sp|O88746|TOM1_MOUSE Target of Myb protein 1 OS=Mus musculus (Mouse) OX=10090 GN=Tom1 PE=1 SV=1	TOM1	11	4	-0.401138	0.00450037	0.0112281	FALSE	59	65	-0.361754
Q8BGX2	Q8BGX2	>sp|Q8BGX2|TIM29_MOUSE Mitochondrial import inner membrane translocase subunit Tim29 OS=Mus musculus (Mouse) OX=10090 GN=Timm29 PE=1 SV=1	TIMM29	7	7	-0.0658657	0.477645	0.577096	FALSE	68	56	0.237371
O09167	O09167	>sp|O09167|RL21_MOUSE 60S ribosomal protein L21 OS=Mus musculus (Mouse) OX=10090 GN=Rpl21 PE=1 SV=3	RPL21	6	5	0.537424	0.00035083	0.00120813	TRUE	53	42	0.321034
Q571E4	Q571E4	>sp|Q571E4|GALNS_MOUSE N-acetylgalactosamine-6-sulfatase OS=Mus musculus (Mouse) OX=10090 GN=Galns PE=1 SV=2	GALNS	4	1	-0.93223	9.47983e-06	5.32823e-05	TRUE	19	26	-0.758002
P28652	P28652	>sp|P28652|KCC2B_MOUSE Calcium/calmodulin-dependent protein kinase type II subunit beta OS=Mus musculus (Mouse) OX=10090 GN=Camk2b PE=1 SV=2	CAMK2B	10	6	-0.828953	9.4311e-08	1.07495e-06	TRUE	69	67	-0.0923127
Q5SQX6;Q7TMB8	Q5SQX6;Q7TMB8	>sp|Q5SQX6|CYFP2_MOUSE Cytoplasmic FMR1-interacting protein 2 OS=Mus musculus (Mouse) OX=10090 GN=Cyfip2 PE=1 SV=2;>sp|Q7TMB8|CYFP1_MOUSE Cytoplasmic FMR1-interacting protein 1 OS=Mus musculus (Mouse) OX=10090 GN=Cyfip1 PE=1 SV=1	CYFIP2;CYFIP1	19	16	-0.273491	0.00011732	0.000467802	TRUE	167	142	0.179308
P48193	P48193	>sp|P48193|41_MOUSE Protein 4.1 OS=Mus musculus (Mouse) OX=10090 GN=Epb41 PE=1 SV=2	EPB41	7	1	0.338982	0.0538406	0.0959269	FALSE	41	35	0.178882
P62259	P62259	>sp|P62259|1433E_MOUSE 14-3-3 protein epsilon OS=Mus musculus (Mouse) OX=10090 GN=Ywhae PE=1 SV=1	YWHAE	30	14	-0.282325	0.000551567	0.00179135	TRUE	212	186	0.114266
Q8BFR6	Q8BFR6	>sp|Q8BFR6|ZFAN1_MOUSE AN1-type zinc finger protein 1 OS=Mus musculus (Mouse) OX=10090 GN=Zfand1 PE=1 SV=1	ZFAND1	1	0					2	6	-1.86793
Q9ERR1	Q9ERR1	>sp|Q9ERR1|NDEL1_MOUSE Nuclear distribution protein nudE-like 1 OS=Mus musculus (Mouse) OX=10090 GN=Ndel1 PE=1 SV=2	NDEL1	8	5	-0.498827	3.27328e-05	0.000155316	TRUE	64	55	0.157202
Q148V7	Q148V7	>sp|Q148V7|RELCH_MOUSE RAB11-binding protein RELCH OS=Mus musculus (Mouse) OX=10090 GN=Relch PE=1 SV=1	RELCH	27	16	-0.374339	1.28112e-05	6.89463e-05	TRUE	198	192	-0.0914704
P54726;P54728	P54726;P54728	>sp|P54726|RD23A_MOUSE UV excision repair protein RAD23 homolog A OS=Mus musculus (Mouse) OX=10090 GN=Rad23a PE=1 SV=2;>sp|P54728|RD23B_MOUSE UV excision repair protein RAD23 homolog B OS=Mus musculus (Mouse) OX=10090 GN=Rad23b PE=1 SV=2	RAD23A;RAD23B	3	3	-0.475594	5.71612e-05	0.000250178	TRUE	30	24	0.293811
O70274;Q63739	O70274;Q63739	>sp|O70274|TP4A2_MOUSE Protein tyrosine phosphatase type IVA 2 OS=Mus musculus (Mouse) OX=10090 GN=Ptp4a2 PE=1 SV=1;>sp|Q63739|TP4A1_MOUSE Protein tyrosine phosphatase type IVA 1 OS=Mus musculus (Mouse) OX=10090 GN=Ptp4a1 PE=1 SV=1	PTP4A2;PTP4A1	3	3	-0.38552	0.0003589	0.0012298	TRUE	27	22	0.273895
Q8BGF0	Q8BGF0	>tr|Q8BGF0|Q8BGF0_MOUSE Expressed sequence AW551984 OS=Mus musculus (Mouse) OX=10090 GN=AW551984 PE=1 SV=1	AW551984	1	0					1	6	-2.794
O70293	O70293	>sp|O70293|GRK6_MOUSE G protein-coupled receptor kinase 6 OS=Mus musculus (Mouse) OX=10090 GN=Grk6 PE=1 SV=1	GRK6	6	1	-0.314002	0.0624145	0.108828	FALSE	28	33	-0.498099
O70161;P70182	O70161;P70182	>sp|O70161|PI51C_MOUSE Phosphatidylinositol 4-phosphate 5-kinase type-1 gamma OS=Mus musculus (Mouse) OX=10090 GN=Pip5k1c PE=1 SV=2;>sp|P70182|PI51A_MOUSE Phosphatidylinositol 4-phosphate 5-kinase type-1 alpha OS=Mus musculus (Mouse) OX=10090 GN=Pip5k1a PE=1 SV=2	PIP5K1C;PIP5K1A	2	2	-0.538085	0.000395111	0.00133947	TRUE	17	15	0.0956027
Q3UPH1	Q3UPH1	>sp|Q3UPH1|PRRC1_MOUSE Protein PRRC1 OS=Mus musculus (Mouse) OX=10090 GN=Prrc1 PE=1 SV=1	PRRC1	4	2	0.0844189	0.544767	0.638667	FALSE	31	18	0.927094
B2RSH2;P08752;P18872;Q9DC51	B2RSH2;P08752;P18872;Q9DC51	>sp|B2RSH2|GNAI1_MOUSE Guanine nucleotide-binding protein G(i) subunit alpha-1 OS=Mus musculus (Mouse) OX=10090 GN=Gnai1 PE=1 SV=1;>sp|P08752|GNAI2_MOUSE Guanine nucleotide-binding protein G(i) subunit alpha-2 OS=Mus musculus (Mouse) OX=10090 GN=Gnai2 PE=1 SV=5;>sp|P18872|GNAO_MOUSE Guanine nucleotide-binding protein G(o) subunit alpha OS=Mus musculus (Mouse) OX=10090 GN=Gnao1 PE=1 SV=3;>sp|Q9DC5…	GNAI1;GNAI2;GNAO1;GNAI3	1	1	-0.379833	0.00082809	0.00255603	TRUE	10	8	0.266117
Q5SSM3	Q5SSM3	>sp|Q5SSM3|RHG44_MOUSE Rho GTPase-activating protein 44 OS=Mus musculus (Mouse) OX=10090 GN=Arhgap44 PE=1 SV=1	ARHGAP44	8	3	-0.617812	0.000314487	0.00109847	TRUE	47	59	-0.636056
Q9JI10;Q9JI11	Q9JI10;Q9JI11	>sp|Q9JI10|STK3_MOUSE Serine/threonine-protein kinase 3 OS=Mus musculus (Mouse) OX=10090 GN=Stk3 PE=1 SV=1;>sp|Q9JI11|STK4_MOUSE Serine/threonine-protein kinase 4 OS=Mus musculus (Mouse) OX=10090 GN=Stk4 PE=1 SV=1	STK3;STK4	3	2	-0.0733371	0.443705	0.546705	FALSE	26	21	0.274934
Q8C547	Q8C547	>sp|Q8C547|HTR5B_MOUSE HEAT repeat-containing protein 5B OS=Mus musculus (Mouse) OX=10090 GN=Heatr5b PE=1 SV=3	HEATR5B	7	2	-0.167118	0.340111	0.444237	FALSE	40	26	0.684198
P61294	P61294	>sp|P61294|RAB6B_MOUSE Ras-related protein Rab-6B OS=Mus musculus (Mouse) OX=10090 GN=Rab6b PE=1 SV=1	RAB6B	9	5	-0.190952	0.0266854	0.0531333	FALSE	61	58	-0.0441088
Q9WV80	Q9WV80	>sp|Q9WV80|SNX1_MOUSE Sorting nexin-1 OS=Mus musculus (Mouse) OX=10090 GN=Snx1 PE=1 SV=1	SNX1	15	13	-0.292741	8.07184e-05	0.000335437	TRUE	134	115	0.16267
Q8C1B7;Q8CHH9	Q8C1B7;Q8CHH9	>sp|Q8C1B7|SEP11_MOUSE Septin-11 OS=Mus musculus (Mouse) OX=10090 GN=Septin11 PE=1 SV=4;>sp|Q8CHH9|SEPT8_MOUSE Septin-8 OS=Mus musculus (Mouse) OX=10090 GN=Septin8 PE=1 SV=4	SEPTIN11;SEPTIN8	1	1	-0.761637	4.47547e-06	2.81419e-05	TRUE	10	8	0.266117
P12382;P47857	P12382;P47857	>sp|P12382|PFKAL_MOUSE ATP-dependent 6-phosphofructokinase, liver type OS=Mus musculus (Mouse) OX=10090 GN=Pfkl PE=1 SV=4;>sp|P47857|PFKAM_MOUSE ATP-dependent 6-phosphofructokinase, muscle type OS=Mus musculus (Mouse) OX=10090 GN=Pfkm PE=1 SV=3	PFKL;PFKM	1	1	-0.495104	0.000352322	0.00121168	TRUE	10	8	0.266117
Q8BHL3	Q8BHL3	>sp|Q8BHL3|TB10B_MOUSE TBC1 domain family member 10B OS=Mus musculus (Mouse) OX=10090 GN=Tbc1d10b PE=1 SV=2	TBC1D10B	7	3	0.224653	0.0485625	0.0877268	FALSE	53	36	0.626003
G5E8X2;Q6PHQ9	G5E8X2;Q6PHQ9	>tr|G5E8X2|G5E8X2_MOUSE MCG12357 OS=Mus musculus (Mouse) OX=10090 GN=Pabpc4l PE=4 SV=1;>tr|Q6PHQ9|Q6PHQ9_MOUSE Polyadenylate-binding protein OS=Mus musculus (Mouse) OX=10090 GN=Pabpc4 PE=1 SV=1	PABPC4L;PABPC4	1	1	-0.230054	0.461945	0.563662	FALSE	9	8	0.0775288
P23818;Q9Z2W8;Q9Z2W9	P23818;Q9Z2W8;Q9Z2W9	>sp|P23818|GRIA1_MOUSE Glutamate receptor 1 OS=Mus musculus (Mouse) OX=10090 GN=Gria1 PE=1 SV=1;>sp|Q9Z2W8|GRIA4_MOUSE Glutamate receptor 4 OS=Mus musculus (Mouse) OX=10090 GN=Gria4 PE=1 SV=2;>sp|Q9Z2W9|GRIA3_MOUSE Glutamate receptor 3 OS=Mus musculus (Mouse) OX=10090 GN=Gria3 PE=1 SV=2	GRIA1;GRIA4;GRIA3	1	1	-1.4393	1.98557e-11	1.26164e-09	TRUE	10	8	0.266117
Q9QXV8	Q9QXV8	>sp|Q9QXV8|SPY2_MOUSE Protein sprouty homolog 2 OS=Mus musculus (Mouse) OX=10090 GN=Spry2 PE=2 SV=1	SPRY2	3	3	-0.0958392	0.458811	0.560816	FALSE	28	23	0.240347
Q9Z2A0	Q9Z2A0	>sp|Q9Z2A0|PDPK1_MOUSE 3-phosphoinositide-dependent protein kinase 1 OS=Mus musculus (Mouse) OX=10090 GN=Pdpk1 PE=1 SV=2	PDPK1	12	6	-0.307729	0.0027708	0.00732834	TRUE	92	78	0.177426
B9EJA2	B9EJA2	>sp|B9EJA2|CTTB2_MOUSE Cortactin-binding protein 2 OS=Mus musculus (Mouse) OX=10090 GN=Cttnbp2 PE=1 SV=2	CTTNBP2	20	6	-0.834992	1.13413e-08	1.8329e-07	TRUE	96	146	-1.02322
Q7TQH0	Q7TQH0	>sp|Q7TQH0|ATX2L_MOUSE Ataxin-2-like protein OS=Mus musculus (Mouse) OX=10090 GN=Atxn2l PE=1 SV=1	ATXN2L	19	8	-0.654673	3.18889e-07	3.01303e-06	TRUE	108	142	-0.723352
Q8BMB3	Q8BMB3	>sp|Q8BMB3|IF4E2_MOUSE Eukaryotic translation initiation factor 4E type 2 OS=Mus musculus (Mouse) OX=10090 GN=Eif4e2 PE=1 SV=1	EIF4E2	2	1	-0.324616	0.138572	0.21435	FALSE	16	12	0.388393
Q9DBC3	Q9DBC3	>sp|Q9DBC3|CMTR1_MOUSE Cap-specific mRNA (nucleoside-2'-O-)-methyltransferase 1 OS=Mus musculus (Mouse) OX=10090 GN=Cmtr1 PE=1 SV=1	CMTR1	8	5	0.375142	0.000209861	0.000771866	TRUE	67	50	0.444448
P19324	P19324	>sp|P19324|SERPH_MOUSE Serpin H1 OS=Mus musculus (Mouse) OX=10090 GN=Serpinh1 PE=1 SV=3	SERPINH1	16	8	-1.10704	1.28889e-09	3.24561e-08	TRUE	98	101	-0.22162
Q91YT0	Q91YT0	>sp|Q91YT0|NDUV1_MOUSE NADH dehydrogenase [ubiquinone] flavoprotein 1, mitochondrial OS=Mus musculus (Mouse) OX=10090 GN=Ndufv1 PE=1 SV=1	NDUFV1	14	13	-0.182923	0.00412294	0.010387	FALSE	132	107	0.277327
Q8K0U4	Q8K0U4	>sp|Q8K0U4|HS12A_MOUSE Heat shock 70 kDa protein 12A OS=Mus musculus (Mouse) OX=10090 GN=Hspa12a PE=1 SV=1	HSPA12A	26	17	-1.40235	5.94425e-13	1.14936e-10	TRUE	192	191	-0.143756
Q3UVG3	Q3UVG3	>sp|Q3UVG3|F91A1_MOUSE Protein FAM91A1 OS=Mus musculus (Mouse) OX=10090 GN=Fam91a1 PE=1 SV=1	FAM91A1	5	1	-0.300131	0.299849	0.401964	FALSE	34	27	0.251166
O55091	O55091	>sp|O55091|IMPCT_MOUSE Protein IMPACT OS=Mus musculus (Mouse) OX=10090 GN=Impact PE=1 SV=2	IMPACT	13	11	-0.197223	0.00461327	0.0114675	FALSE	113	98	0.139356
Q8C7M3	Q8C7M3	>sp|Q8C7M3|TRIM9_MOUSE E3 ubiquitin-protein ligase TRIM9 OS=Mus musculus (Mouse) OX=10090 GN=Trim9 PE=1 SV=2	TRIM9	11	2	-1.12542	3.61997e-10	1.19503e-08	TRUE	43	62	-0.901272
Q8CI94	Q8CI94	>sp|Q8CI94|PYGB_MOUSE Glycogen phosphorylase, brain form OS=Mus musculus (Mouse) OX=10090 GN=Pygb PE=1 SV=3	PYGB	32	17	-1.13099	2.12591e-11	1.30791e-09	TRUE	225	221	-0.118588
Q99L27;Q9DCZ1	Q99L27;Q9DCZ1	>sp|Q99L27|GMPR2_MOUSE GMP reductase 2 OS=Mus musculus (Mouse) OX=10090 GN=Gmpr2 PE=1 SV=2;>sp|Q9DCZ1|GMPR1_MOUSE GMP reductase 1 OS=Mus musculus (Mouse) OX=10090 GN=Gmpr PE=1 SV=1	GMPR2;GMPR	1	1	-0.382921	0.00191386	0.00527578	TRUE	10	8	0.266117
Q8CHC4	Q8CHC4	>sp|Q8CHC4|SYNJ1_MOUSE Synaptojanin-1 OS=Mus musculus (Mouse) OX=10090 GN=Synj1 PE=1 SV=3	SYNJ1	49	38	-1.34336	3.66874e-14	1.89072e-11	TRUE	406	384	-0.0405287
Q61831;Q91Y86;Q9WTU6	Q61831;Q91Y86;Q9WTU6	>sp|Q61831|MK10_MOUSE Mitogen-activated protein kinase 10 OS=Mus musculus (Mouse) OX=10090 GN=Mapk10 PE=1 SV=2;>sp|Q91Y86|MK08_MOUSE Mitogen-activated protein kinase 8 OS=Mus musculus (Mouse) OX=10090 GN=Mapk8 PE=1 SV=1;>sp|Q9WTU6|MK09_MOUSE Mitogen-activated protein kinase 9 OS=Mus musculus (Mouse) OX=10090 GN=Mapk9 PE=1 SV=2	MAPK10;MAPK8;MAPK9	3	3	-0.302809	0.000754375	0.0023608	TRUE	30	22	0.467044
Q9EQZ6	Q9EQZ6	>sp|Q9EQZ6|RPGF4_MOUSE Rap guanine nucleotide exchange factor 4 OS=Mus musculus (Mouse) OX=10090 GN=Rapgef4 PE=1 SV=1	RAPGEF4	16	2	-2.02821	1.02896e-10	4.31846e-09	TRUE	36	111	-2.44491
Q8CI94;Q9WUB3	Q8CI94;Q9WUB3	>sp|Q8CI94|PYGB_MOUSE Glycogen phosphorylase, brain form OS=Mus musculus (Mouse) OX=10090 GN=Pygb PE=1 SV=3;>sp|Q9WUB3|PYGM_MOUSE Glycogen phosphorylase, muscle form OS=Mus musculus (Mouse) OX=10090 GN=Pygm PE=1 SV=3	PYGB;PYGM	5	2	-0.921227	3.62559e-09	7.3793e-08	TRUE	27	36	-0.744078
Q9QY73	Q9QY73	>sp|Q9QY73|TMM59_MOUSE Transmembrane protein 59 OS=Mus musculus (Mouse) OX=10090 GN=Tmem59 PE=1 SV=2	TMEM59	2	1	0.243862	0.115774	0.183382	FALSE	14	10	0.458253
P22315	P22315	>sp|P22315|HEMH_MOUSE Ferrochelatase, mitochondrial OS=Mus musculus (Mouse) OX=10090 GN=Fech PE=1 SV=2	FECH	11	7	-0.639246	7.03751e-10	1.9539e-08	TRUE	77	74	-0.0703547
P35436	P35436	>sp|P35436|NMDE1_MOUSE Glutamate receptor ionotropic, NMDA 2A OS=Mus musculus (Mouse) OX=10090 GN=Grin2a PE=1 SV=2	GRIN2A	2	0					6	10	-1.04788
P62918	P62918	>sp|P62918|RL8_MOUSE 60S ribosomal protein L8 OS=Mus musculus (Mouse) OX=10090 GN=Rpl8 PE=1 SV=2	RPL8	8	6	1.02763	4.06034e-07	3.68837e-06	TRUE	72	54	0.436474
P60670	P60670	>sp|P60670|NPL4_MOUSE Nuclear protein localization protein 4 homolog OS=Mus musculus (Mouse) OX=10090 GN=Nploc4 PE=1 SV=3	NPLOC4	12	2	-0.821728	6.27624e-08	7.74022e-07	TRUE	57	79	-0.836819
Q01065;Q61481;Q64338	Q01065;Q61481;Q64338	>sp|Q01065|PDE1B_MOUSE Calcium/calmodulin-dependent 3',5'-cyclic nucleotide phosphodiesterase 1B OS=Mus musculus (Mouse) OX=10090 GN=Pde1b PE=1 SV=2;>sp|Q61481|PDE1A_MOUSE Calcium/calmodulin-dependent 3',5'-cyclic nucleotide phosphodiesterase 1A OS=Mus musculus (Mouse) OX=10090 GN=Pde1a PE=1 SV=3;>sp|Q64338|PDE1C_MOUSE Calcium/calmodulin-dependent 3',5'-cyclic nucleotide phosphodiesterase 1C OS=M…	PDE1B;PDE1A;PDE1C	1	1	0.1956	0.367661	0.472358	FALSE	8	8	-0.136368
E9Q634	E9Q634	>sp|E9Q634|MYO1E_MOUSE Unconventional myosin-Ie OS=Mus musculus (Mouse) OX=10090 GN=Myo1e PE=1 SV=1	MYO1E	2	0					8	13	-1.05583
Q9CWZ7	Q9CWZ7	>sp|Q9CWZ7|SNAG_MOUSE Gamma-soluble NSF attachment protein OS=Mus musculus (Mouse) OX=10090 GN=Napg PE=1 SV=1	NAPG	13	11	-0.163519	0.0165815	0.0355252	FALSE	117	100	0.164747
P47809	P47809	>sp|P47809|MP2K4_MOUSE Dual specificity mitogen-activated protein kinase kinase 4 OS=Mus musculus (Mouse) OX=10090 GN=Map2k4 PE=1 SV=2	MAP2K4	8	3	-1.07798	1.9853e-09	4.57379e-08	TRUE	46	59	-0.667746
Q9Z1S5	Q9Z1S5	>sp|Q9Z1S5|SEPT3_MOUSE Neuronal-specific septin-3 OS=Mus musculus (Mouse) OX=10090 GN=Septin3 PE=1 SV=2	SEPTIN3	20	14	-0.32179	0.000553857	0.00179663	TRUE	161	143	0.0900501
Q8BG58	Q8BG58	>sp|Q8BG58|P4HTM_MOUSE Transmembrane prolyl 4-hydroxylase OS=Mus musculus (Mouse) OX=10090 GN=P4htm PE=1 SV=1	P4HTM	2	2	-0.447923	0.0015909	0.00449537	TRUE	17	15	0.11124
Q6R891	Q6R891	>sp|Q6R891|NEB2_MOUSE Neurabin-2 OS=Mus musculus (Mouse) OX=10090 GN=Ppp1r9b PE=1 SV=1	PPP1R9B	27	14	-0.629655	1.71784e-07	1.79544e-06	TRUE	187	187	-0.1598
Q8BXK8;Q8VHH5	Q8BXK8;Q8VHH5	>sp|Q8BXK8|AGAP1_MOUSE Arf-GAP with GTPase, ANK repeat and PH domain-containing protein 1 OS=Mus musculus (Mouse) OX=10090 GN=Agap1 PE=1 SV=1;>sp|Q8VHH5|AGAP3_MOUSE Arf-GAP with GTPase, ANK repeat and PH domain-containing protein 3 OS=Mus musculus (Mouse) OX=10090 GN=Agap3 PE=1 SV=1	AGAP1;AGAP3	4	3	0.201083	0.0319976	0.0618255	FALSE	37	26	0.553381
P06151	P06151	>sp|P06151|LDHA_MOUSE L-lactate dehydrogenase A chain OS=Mus musculus (Mouse) OX=10090 GN=Ldha PE=1 SV=3	LDHA	17	13	-0.358321	3.72022e-05	0.000173632	TRUE	145	118	0.265127
Q0VBD0	Q0VBD0	>sp|Q0VBD0|ITB8_MOUSE Integrin beta-8 OS=Mus musculus (Mouse) OX=10090 GN=Itgb8 PE=1 SV=1	ITGB8	6	0					12	29	-1.85041
P35283	P35283	>sp|P35283|RAB12_MOUSE Ras-related protein Rab-12 OS=Mus musculus (Mouse) OX=10090 GN=Rab12 PE=1 SV=3	RAB12	9	8	-0.504867	7.11309e-09	1.26263e-07	TRUE	86	68	0.326705
Q91VZ6	Q91VZ6	>sp|Q91VZ6|SMAP1_MOUSE Stromal membrane-associated protein 1 OS=Mus musculus (Mouse) OX=10090 GN=Smap1 PE=1 SV=1	SMAP1	3	3	-0.635902	9.76799e-08	1.11093e-06	TRUE	30	24	0.293811
Q04735	Q04735	>sp|Q04735|CDK16_MOUSE Cyclin-dependent kinase 16 OS=Mus musculus (Mouse) OX=10090 GN=Cdk16 PE=1 SV=1	CDK16	7	1	-0.928014	0.000760164	0.00237754	TRUE	24	47	-1.52303
Q922R1	Q922R1	>sp|Q922R1|CP070_MOUSE UPF0183 protein C16orf70 homolog OS=Mus musculus (Mouse) OX=10090 GN=MGI:2443049 PE=1 SV=2	MGI:2443049	1	1	-0.100693	0.354839	0.458826	FALSE	10	8	0.266117
P08551	P08551	>sp|P08551|NFL_MOUSE Neurofilament light polypeptide OS=Mus musculus (Mouse) OX=10090 GN=Nefl PE=1 SV=5	NEFL	30	11	-2.88933	3.47402e-15	3.13473e-12	TRUE	134	194	-0.904001
Q8C0D4	Q8C0D4	>sp|Q8C0D4|RHG12_MOUSE Rho GTPase-activating protein 12 OS=Mus musculus (Mouse) OX=10090 GN=Arhgap12 PE=1 SV=2	ARHGAP12	3	2	-0.293034	0.0396003	0.0741854	FALSE	23	20	0.108057
Q8BNU0	Q8BNU0	>sp|Q8BNU0|ARMC6_MOUSE Armadillo repeat-containing protein 6 OS=Mus musculus (Mouse) OX=10090 GN=Armc6 PE=1 SV=1	ARMC6	11	10	-0.126951	0.118031	0.186466	FALSE	98	84	0.161892
P70336	P70336	>sp|P70336|ROCK2_MOUSE Rho-associated protein kinase 2 OS=Mus musculus (Mouse) OX=10090 GN=Rock2 PE=1 SV=1	ROCK2	34	27	0.0820887	0.324608	0.42791	FALSE	295	244	0.234468
Q9Z1W9	Q9Z1W9	>sp|Q9Z1W9|STK39_MOUSE STE20/SPS1-related proline-alanine-rich protein kinase OS=Mus musculus (Mouse) OX=10090 GN=Stk39 PE=1 SV=1	STK39	4	3	0.113448	0.271106	0.370873	FALSE	34	27	0.318012
Q8BGV0	Q8BGV0	>sp|Q8BGV0|SYNM_MOUSE Probable asparagine--tRNA ligase, mitochondrial OS=Mus musculus (Mouse) OX=10090 GN=Nars2 PE=1 SV=1	NARS2	6	5	0.3545	0.000622341	0.00199252	TRUE	57	45	0.321808
P58404	P58404	>sp|P58404|STRN4_MOUSE Striatin-4 OS=Mus musculus (Mouse) OX=10090 GN=Strn4 PE=1 SV=2	STRN4	10	7	-0.694964	4.60715e-09	8.90826e-08	TRUE	84	78	-0.00249617
F8VPU2	F8VPU2	>sp|F8VPU2|FARP1_MOUSE FERM, ARHGEF and pleckstrin domain-containing protein 1 OS=Mus musculus (Mouse) OX=10090 GN=Farp1 PE=1 SV=1	FARP1	26	16	-0.34617	1.61388e-05	8.45026e-05	TRUE	192	169	0.103158
Q9Z2L6	Q9Z2L6	>sp|Q9Z2L6|MINP1_MOUSE Multiple inositol polyphosphate phosphatase 1 OS=Mus musculus (Mouse) OX=10090 GN=Minpp1 PE=1 SV=3	MINPP1	1	1	0.843919	2.86291e-07	2.74392e-06	TRUE	10	8	0.266117
Q68FF6	Q68FF6	>sp|Q68FF6|GIT1_MOUSE ARF GTPase-activating protein GIT1 OS=Mus musculus (Mouse) OX=10090 GN=Git1 PE=1 SV=1	GIT1	16	9	-0.424986	6.93781e-06	4.13216e-05	TRUE	109	114	-0.250701
Q9CWK8	Q9CWK8	>sp|Q9CWK8|SNX2_MOUSE Sorting nexin-2 OS=Mus musculus (Mouse) OX=10090 GN=Snx2 PE=1 SV=2	SNX2	15	14	-0.281636	4.73062e-07	4.17807e-06	TRUE	145	118	0.267997
Q811C2	Q811C2	>sp|Q811C2|ATG4C_MOUSE Cysteine protease ATG4C OS=Mus musculus (Mouse) OX=10090 GN=Atg4c PE=1 SV=2	ATG4C	1	0					6	6	-0.159984
E9PWR4	E9PWR4	>tr|E9PWR4|E9PWR4_MOUSE DMAP-interaction domain-containing protein OS=Mus musculus (Mouse) OX=10090 GN=Dip2c PE=1 SV=1	DIP2C	19	13	-0.257204	0.000130296	0.000509329	TRUE	148	137	0.000340632
Q5SQX6	Q5SQX6	>sp|Q5SQX6|CYFP2_MOUSE Cytoplasmic FMR1-interacting protein 2 OS=Mus musculus (Mouse) OX=10090 GN=Cyfip2 PE=1 SV=2	CYFIP2	25	23	-0.136011	0.0300875	0.0587004	FALSE	230	189	0.249443
Q60715	Q60715	>sp|Q60715|P4HA1_MOUSE Prolyl 4-hydroxylase subunit alpha-1 OS=Mus musculus (Mouse) OX=10090 GN=P4ha1 PE=1 SV=2	P4HA1	8	3	-0.525304	1.56451e-06	1.13847e-05	TRUE	46	43	-0.0325257
Q62507	Q62507	>sp|Q62507|COCH_MOUSE Cochlin OS=Mus musculus (Mouse) OX=10090 GN=Coch PE=1 SV=2	COCH	2	0					1	10	-3.75861
Q6PHU5	Q6PHU5	>sp|Q6PHU5|SORT_MOUSE Sortilin OS=Mus musculus (Mouse) OX=10090 GN=Sort1 PE=1 SV=1	SORT1	12	8	-0.296038	2.71848e-05	0.000132953	TRUE	90	78	0.138158
Q8C079;Q8C9H6	Q8C079;Q8C9H6	>sp|Q8C079|STRP1_MOUSE Striatin-interacting protein 1 OS=Mus musculus (Mouse) OX=10090 GN=Strip1 PE=1 SV=2;>sp|Q8C9H6|STRP2_MOUSE Striatin-interacting proteins 2 OS=Mus musculus (Mouse) OX=10090 GN=Strip2 PE=1 SV=1	STRIP1;STRIP2	2	2	-0.400688	0.0191204	0.0401232	FALSE	20	16	0.286542
Q9CQ75	Q9CQ75	>sp|Q9CQ75|NDUA2_MOUSE NADH dehydrogenase [ubiquinone] 1 alpha subcomplex subunit 2 OS=Mus musculus (Mouse) OX=10090 GN=Ndufa2 PE=1 SV=3	NDUFA2	4	2	-0.428558	0.013914	0.0305475	FALSE	24	26	-0.30935
P47754	P47754	>sp|P47754|CAZA2_MOUSE F-actin-capping protein subunit alpha-2 OS=Mus musculus (Mouse) OX=10090 GN=Capza2 PE=1 SV=3	CAPZA2	9	8	-0.375596	2.53215e-05	0.000125656	TRUE	82	69	0.202258
Q5DU25	Q5DU25	>sp|Q5DU25|IQEC2_MOUSE IQ motif and SEC7 domain-containing protein 2 OS=Mus musculus (Mouse) OX=10090 GN=Iqsec2 PE=1 SV=3	IQSEC2	7	3	-0.494864	2.32801e-05	0.000116594	TRUE	41	44	-0.293515
Q5SSL4;Q6PAJ1	Q5SSL4;Q6PAJ1	>sp|Q5SSL4|ABR_MOUSE Active breakpoint cluster region-related protein OS=Mus musculus (Mouse) OX=10090 GN=Abr PE=1 SV=1;>sp|Q6PAJ1|BCR_MOUSE Breakpoint cluster region protein OS=Mus musculus (Mouse) OX=10090 GN=Bcr PE=1 SV=3	ABR;BCR	1	1	-1.35733	6.94558e-10	1.94771e-08	TRUE	10	8	0.266117
P47757	P47757	>sp|P47757|CAPZB_MOUSE F-actin-capping protein subunit beta OS=Mus musculus (Mouse) OX=10090 GN=Capzb PE=1 SV=3	CAPZB	15	6	-0.373403	1.21062e-06	9.13426e-06	TRUE	97	101	-0.233359
P97820;Q9JM52	P97820;Q9JM52	>sp|P97820|M4K4_MOUSE Mitogen-activated protein kinase kinase kinase kinase 4 OS=Mus musculus (Mouse) OX=10090 GN=Map4k4 PE=1 SV=1;>sp|Q9JM52|MINK1_MOUSE Misshapen-like kinase 1 OS=Mus musculus (Mouse) OX=10090 GN=Mink1 PE=1 SV=3	MAP4K4;MINK1	1	1	-0.438848	0.00119134	0.00349969	TRUE	10	8	0.266117
Q8BGU5	Q8BGU5	>sp|Q8BGU5|CCNY_MOUSE Cyclin-Y OS=Mus musculus (Mouse) OX=10090 GN=Ccny PE=1 SV=1	CCNY	7	4	-0.127018	0.172342	0.256435	FALSE	51	43	0.18201
Q8R4N0	Q8R4N0	>sp|Q8R4N0|CLYBL_MOUSE Citramalyl-CoA lyase, mitochondrial OS=Mus musculus (Mouse) OX=10090 GN=Clybl PE=1 SV=2	CLYBL	7	6	-0.23897	0.023384	0.0475407	FALSE	59	53	0.0586624
Q8C145	Q8C145	>sp|Q8C145|S39A6_MOUSE Zinc transporter ZIP6 OS=Mus musculus (Mouse) OX=10090 GN=Slc39a6 PE=1 SV=1	SLC39A6	3	2	0.274691	0.0246432	0.0496348	FALSE	25	21	0.183522
Q60610	Q60610	>sp|Q60610|TIAM1_MOUSE T-lymphoma invasion and metastasis-inducing protein 1 OS=Mus musculus (Mouse) OX=10090 GN=Tiam1 PE=1 SV=1	TIAM1	2	0					6	7	-0.422136
Q5FW52	Q5FW52	>sp|Q5FW52|MLIP_MOUSE Muscular LMNA-interacting protein OS=Mus musculus (Mouse) OX=10090 GN=Mlip PE=1 SV=1	MLIP	4	0					7	17	-1.93008
O88456;Q9D7J7	O88456;Q9D7J7	>sp|O88456|CPNS1_MOUSE Calpain small subunit 1 OS=Mus musculus (Mouse) OX=10090 GN=Capns1 PE=1 SV=1;>sp|Q9D7J7|CPNS2_MOUSE Calpain small subunit 2 OS=Mus musculus (Mouse) OX=10090 GN=Capns2 PE=2 SV=1	CAPNS1;CAPNS2	1	1	-0.133188	0.562185	0.653709	FALSE	10	8	0.266117
Q9R008	Q9R008	>sp|Q9R008|KIME_MOUSE Mevalonate kinase OS=Mus musculus (Mouse) OX=10090 GN=Mvk PE=1 SV=1	MVK	9	6	-0.354182	0.000190548	0.000708535	TRUE	74	63	0.18018
O88643;Q61036;Q8CIN4	O88643;Q61036;Q8CIN4	>sp|O88643|PAK1_MOUSE Serine/threonine-protein kinase PAK 1 OS=Mus musculus (Mouse) OX=10090 GN=Pak1 PE=1 SV=1;>sp|Q61036|PAK3_MOUSE Serine/threonine-protein kinase PAK 3 OS=Mus musculus (Mouse) OX=10090 GN=Pak3 PE=1 SV=2;>sp|Q8CIN4|PAK2_MOUSE Serine/threonine-protein kinase PAK 2 OS=Mus musculus (Mouse) OX=10090 GN=Pak2 PE=1 SV=1	PAK1;PAK3;PAK2	1	1	-0.559348	7.79646e-05	0.000325695	TRUE	9	7	0.326095
Q5DTT2	Q5DTT2	>sp|Q5DTT2|PSD1_MOUSE PH and SEC7 domain-containing protein 1 OS=Mus musculus (Mouse) OX=10090 GN=Psd PE=1 SV=2	PSD	11	4	0.0165222	0.843588	0.885113	FALSE	85	48	1.02036
Q9R1K9	Q9R1K9	>sp|Q9R1K9|CETN2_MOUSE Centrin-2 OS=Mus musculus (Mouse) OX=10090 GN=Cetn2 PE=1 SV=1	CETN2	2	1	0.014127	0.906355	0.931828	FALSE	14	12	0.184885
Q8CDN6	Q8CDN6	>sp|Q8CDN6|TXNL1_MOUSE Thioredoxin-like protein 1 OS=Mus musculus (Mouse) OX=10090 GN=Txnl1 PE=1 SV=3	TXNL1	9	9	0.161155	0.0142202	0.031119	FALSE	88	69	0.345213
P48774	P48774	>sp|P48774|GSTM5_MOUSE Glutathione S-transferase Mu 5 OS=Mus musculus (Mouse) OX=10090 GN=Gstm5 PE=1 SV=1	GSTM5	8	6	-0.664966	7.21932e-06	4.24665e-05	TRUE	68	56	0.243225
Q6P9R4	Q6P9R4	>sp|Q6P9R4|ARHGI_MOUSE Rho guanine nucleotide exchange factor 18 OS=Mus musculus (Mouse) OX=10090 GN=Arhgef18 PE=1 SV=3	ARHGEF18	4	0					1	25	-5.57472
P51830	P51830	>sp|P51830|ADCY9_MOUSE Adenylate cyclase type 9 OS=Mus musculus (Mouse) OX=10090 GN=Adcy9 PE=1 SV=1	ADCY9	11	1	-0.739497	6.24321e-05	0.000269114	TRUE	38	57	-0.990534
Q7TN33;Q7TSY6	Q7TN33;Q7TSY6	>sp|Q7TN33|CELF6_MOUSE CUGBP Elav-like family member 6 OS=Mus musculus (Mouse) OX=10090 GN=Celf6 PE=2 SV=1;>sp|Q7TSY6|CELF4_MOUSE CUGBP Elav-like family member 4 OS=Mus musculus (Mouse) OX=10090 GN=Celf4 PE=1 SV=2	CELF6;CELF4	1	1	0.188782	0.136441	0.211356	FALSE	10	8	0.266117
Q2KN98	Q2KN98	>sp|Q2KN98|CYTSA_MOUSE Cytospin-A OS=Mus musculus (Mouse) OX=10090 GN=Specc1l PE=1 SV=1	SPECC1L	5	1	-0.136153	0.438475	0.542359	FALSE	31	22	0.557311
Q8C407	Q8C407	>sp|Q8C407|YIPF4_MOUSE Protein YIPF4 OS=Mus musculus (Mouse) OX=10090 GN=Yipf4 PE=1 SV=1	YIPF4	2	2	0.0130551	0.906191	0.931828	FALSE	20	16	0.286542
P59108	P59108	>sp|P59108|CPNE2_MOUSE Copine-2 OS=Mus musculus (Mouse) OX=10090 GN=Cpne2 PE=1 SV=1	CPNE2	12	8	-0.339154	0.00241343	0.00649742	TRUE	94	85	0.0388658
G5E895	G5E895	>tr|G5E895|G5E895_MOUSE Aldo_ket_red domain-containing protein OS=Mus musculus (Mouse) OX=10090 GN=Akr1b10 PE=1 SV=1	AKR1B10	8	4	-1.29921	7.01788e-13	1.26649e-10	TRUE	52	51	-0.116206
Q9R0Q6	Q9R0Q6	>sp|Q9R0Q6|ARC1A_MOUSE Actin-related protein 2/3 complex subunit 1A OS=Mus musculus (Mouse) OX=10090 GN=Arpc1a PE=1 SV=1	ARPC1A	13	10	-0.72251	1.10279e-10	4.55762e-09	TRUE	113	99	0.116688
P62962	P62962	>sp|P62962|PROF1_MOUSE Profilin-1 OS=Mus musculus (Mouse) OX=10090 GN=Pfn1 PE=1 SV=2	PFN1	12	9	-0.643985	3.09288e-08	4.33804e-07	TRUE	99	85	0.157774
Q9QZN4	Q9QZN4	>sp|Q9QZN4|FBX6_MOUSE F-box only protein 6 OS=Mus musculus (Mouse) OX=10090 GN=Fbxo6 PE=1 SV=1	FBXO6	2	1	-0.350005	0.021503	0.0444171	FALSE	16	15	-0.045302
Q9D898	Q9D898	>sp|Q9D898|ARP5L_MOUSE Actin-related protein 2/3 complex subunit 5-like protein OS=Mus musculus (Mouse) OX=10090 GN=Arpc5l PE=1 SV=1	ARPC5L	3	3	-0.831075	2.50852e-07	2.44265e-06	TRUE	30	24	0.293811
Q99K01	Q99K01	>sp|Q99K01|PDXD1_MOUSE Pyridoxal-dependent decarboxylase domain-containing protein 1 OS=Mus musculus (Mouse) OX=10090 GN=Pdxdc1 PE=1 SV=2	PDXDC1	17	8	-0.510301	7.69524e-07	6.25556e-06	TRUE	110	119	-0.307613
Q9CXD6	Q9CXD6	>sp|Q9CXD6|MCUR1_MOUSE Mitochondrial calcium uniporter regulator 1 OS=Mus musculus (Mouse) OX=10090 GN=Mcur1 PE=1 SV=1	MCUR1	4	2	-0.436945	0.00422041	0.0106029	FALSE	25	24	-0.0978633
O70456;P61982;P62259;P63101;P68254;P68510;Q9CQV8	O70456;P61982;P62259;P63101;P68254;P68510;Q9CQV8	>sp|O70456|1433S_MOUSE 14-3-3 protein sigma OS=Mus musculus (Mouse) OX=10090 GN=Sfn PE=1 SV=2;>sp|P61982|1433G_MOUSE 14-3-3 protein gamma OS=Mus musculus (Mouse) OX=10090 GN=Ywhag PE=1 SV=2;>sp|P62259|1433E_MOUSE 14-3-3 protein epsilon OS=Mus musculus (Mouse) OX=10090 GN=Ywhae PE=1 SV=1;>sp|P63101|1433Z_MOUSE 14-3-3 protein zeta/delta OS=Mus musculus (Mouse) OX=10090 GN=Ywhaz PE=1 SV=1;>sp|P68254…	SFN;YWHAG;YWHAE;YWHAZ;YWHAQ;YWHAH;YWHAB	4	2	-0.462598	0.011314	0.0254272	FALSE	32	29	0.0386782
Q8K0S0	Q8K0S0	>sp|Q8K0S0|PHYIP_MOUSE Phytanoyl-CoA hydroxylase-interacting protein OS=Mus musculus (Mouse) OX=10090 GN=Phyhip PE=1 SV=1	PHYHIP	7	5	0.168362	0.0642324	0.111495	FALSE	61	51	0.209477
O55137;Q6Q2Z6;Q9QYR9	O55137;Q6Q2Z6;Q9QYR9	>sp|O55137|ACOT1_MOUSE Acyl-coenzyme A thioesterase 1 OS=Mus musculus (Mouse) OX=10090 GN=Acot1 PE=1 SV=1;>sp|Q6Q2Z6|ACOT5_MOUSE Acyl-coenzyme A thioesterase 5 OS=Mus musculus (Mouse) OX=10090 GN=Acot5 PE=1 SV=2;>sp|Q9QYR9|ACOT2_MOUSE Acyl-coenzyme A thioesterase 2, mitochondrial OS=Mus musculus (Mouse) OX=10090 GN=Acot2 PE=1 SV=2	ACOT1;ACOT5;ACOT2	1	1	-0.328462	0.0103425	0.0236363	FALSE	10	8	0.266117
Q9JHW2	Q9JHW2	>sp|Q9JHW2|NIT2_MOUSE Omega-amidase NIT2 OS=Mus musculus (Mouse) OX=10090 GN=Nit2 PE=1 SV=1	NIT2	10	7	0.00873752	0.889673	0.920093	FALSE	83	64	0.369656
Q80U23	Q80U23	>sp|Q80U23|SNPH_MOUSE Syntaphilin OS=Mus musculus (Mouse) OX=10090 GN=Snph PE=1 SV=3	SNPH	8	3	-0.70714	2.9941e-06	1.99386e-05	TRUE	40	50	-0.618752
Q6TEK5	Q6TEK5	>sp|Q6TEK5|VKORL_MOUSE Vitamin K epoxide reductase complex subunit 1-like protein 1 OS=Mus musculus (Mouse) OX=10090 GN=Vkorc1l1 PE=1 SV=1	VKORC1L1	2	2	-0.185945	0.285598	0.38646	FALSE	18	16	0.05732
P28663	P28663	>sp|P28663|SNAB_MOUSE Beta-soluble NSF attachment protein OS=Mus musculus (Mouse) OX=10090 GN=Napb PE=1 SV=2	NAPB	18	14	-0.457203	5.96284e-07	5.03632e-06	TRUE	153	129	0.196015
Q8BHD7	Q8BHD7	>sp|Q8BHD7|PTBP3_MOUSE Polypyrimidine tract-binding protein 3 OS=Mus musculus (Mouse) OX=10090 GN=Ptbp3 PE=1 SV=1	PTBP3	4	1	0.0484322	0.87688	0.910341	FALSE	35	12	1.99237
Q80VP9	Q80VP9	>sp|Q80VP9|ASPH2_MOUSE Aspartate beta-hydroxylase domain-containing protein 2 OS=Mus musculus (Mouse) OX=10090 GN=Asphd2 PE=1 SV=1	ASPHD2	2	0					10	8	0.239353
Q9D6J6	Q9D6J6	>sp|Q9D6J6|NDUV2_MOUSE NADH dehydrogenase [ubiquinone] flavoprotein 2, mitochondrial OS=Mus musculus (Mouse) OX=10090 GN=Ndufv2 PE=1 SV=2	NDUFV2	8	8	-0.230813	0.000339162	0.00117556	FALSE	77	62	0.292657
A2ALS5;Q5SVL6	A2ALS5;Q5SVL6	>sp|A2ALS5|RPGP1_MOUSE Rap1 GTPase-activating protein 1 OS=Mus musculus (Mouse) OX=10090 GN=Rap1gap PE=1 SV=2;>sp|Q5SVL6|RPGP2_MOUSE Rap1 GTPase-activating protein 2 OS=Mus musculus (Mouse) OX=10090 GN=Rap1gap2 PE=1 SV=1	RAP1GAP;RAP1GAP2	1	1	-0.502237	0.0120964	0.0270396	FALSE	8	8	-0.136672
P97742	P97742	>sp|P97742|CPT1A_MOUSE Carnitine O-palmitoyltransferase 1, liver isoform OS=Mus musculus (Mouse) OX=10090 GN=Cpt1a PE=1 SV=4	CPT1A	16	5	-1.1003	3.97487e-09	8.02984e-08	TRUE	71	99	-0.843937
Q9R049	Q9R049	>sp|Q9R049|AMFR_MOUSE E3 ubiquitin-protein ligase AMFR OS=Mus musculus (Mouse) OX=10090 GN=Amfr PE=1 SV=2	AMFR	5	3	0.16529	0.0756877	0.128295	FALSE	45	31	0.611595
Q62101;Q8K1Y2	Q62101;Q8K1Y2	>sp|Q62101|KPCD1_MOUSE Serine/threonine-protein kinase D1 OS=Mus musculus (Mouse) OX=10090 GN=Prkd1 PE=1 SV=2;>sp|Q8K1Y2|KPCD3_MOUSE Serine/threonine-protein kinase D3 OS=Mus musculus (Mouse) OX=10090 GN=Prkd3 PE=1 SV=1	PRKD1;PRKD3	2	0					6	9	-0.888431
Q8BYM5	Q8BYM5	>sp|Q8BYM5|NLGN3_MOUSE Neuroligin-3 OS=Mus musculus (Mouse) OX=10090 GN=Nlgn3 PE=1 SV=2	NLGN3	10	3	-1.65993	2.50322e-11	1.46864e-09	TRUE	47	76	-1.12911
O70172	O70172	>sp|O70172|PI42A_MOUSE Phosphatidylinositol 5-phosphate 4-kinase type-2 alpha OS=Mus musculus (Mouse) OX=10090 GN=Pip4k2a PE=1 SV=1	PIP4K2A	7	4	0.153267	0.206299	0.297762	FALSE	57	41	0.519324
Q9CQ91	Q9CQ91	>sp|Q9CQ91|NDUA3_MOUSE NADH dehydrogenase [ubiquinone] 1 alpha subcomplex subunit 3 OS=Mus musculus (Mouse) OX=10090 GN=Ndufa3 PE=1 SV=1	NDUFA3	1	0					5	7	-0.68878
O88935	O88935	>sp|O88935|SYN1_MOUSE Synapsin-1 OS=Mus musculus (Mouse) OX=10090 GN=Syn1 PE=1 SV=2	SYN1	33	26	-1.11325	5.36951e-12	5.01216e-10	TRUE	271	233	0.161545
P62821	P62821	>sp|P62821|RAB1A_MOUSE Ras-related protein Rab-1A OS=Mus musculus (Mouse) OX=10090 GN=Rab1A PE=1 SV=3	RAB1A	7	3	-0.240324	0.431454	0.535755	FALSE	46	43	-0.0254302
Q99LR1	Q99LR1	>sp|Q99LR1|ABD12_MOUSE Lysophosphatidylserine lipase ABHD12 OS=Mus musculus (Mouse) OX=10090 GN=Abhd12 PE=1 SV=2	ABHD12	13	10	-0.281142	0.00998921	0.0229256	FALSE	115	100	0.127832
B1AY13	B1AY13	>sp|B1AY13|UBP24_MOUSE Ubiquitin carboxyl-terminal hydrolase 24 OS=Mus musculus (Mouse) OX=10090 GN=Usp24 PE=1 SV=1	USP24	7	2	0.00394196	0.983909	0.98772	FALSE	45	22	1.22752
P59999	P59999	>sp|P59999|ARPC4_MOUSE Actin-related protein 2/3 complex subunit 4 OS=Mus musculus (Mouse) OX=10090 GN=Arpc4 PE=1 SV=3	ARPC4	4	4	-0.647293	9.195e-07	7.24625e-06	TRUE	40	32	0.297538
Q01768	Q01768	>sp|Q01768|NDKB_MOUSE Nucleoside diphosphate kinase B OS=Mus musculus (Mouse) OX=10090 GN=Nme2 PE=1 SV=1	NME2	5	5	-0.20449	0.0143562	0.0313532	FALSE	48	39	0.256839
P39053;P39054	P39053;P39054	>sp|P39053|DYN1_MOUSE Dynamin-1 OS=Mus musculus (Mouse) OX=10090 GN=Dnm1 PE=1 SV=2;>sp|P39054|DYN2_MOUSE Dynamin-2 OS=Mus musculus (Mouse) OX=10090 GN=Dnm2 PE=1 SV=2	DNM1;DNM2	3	3	-0.647624	1.23976e-05	6.73194e-05	TRUE	29	23	0.307239
P55066	P55066	>sp|P55066|NCAN_MOUSE Neurocan core protein OS=Mus musculus (Mouse) OX=10090 GN=Ncan PE=1 SV=1	NCAN	6	5	-1.03252	2.26205e-08	3.34611e-07	TRUE	57	48	0.192894
P97825	P97825	>sp|P97825|JUPI1_MOUSE Jupiter microtubule associated homolog 1 OS=Mus musculus (Mouse) OX=10090 GN=Jpt1 PE=1 SV=3	JPT1	2	0					6	10	-1.14765
O35643;Q9DBG3	O35643;Q9DBG3	>sp|O35643|AP1B1_MOUSE AP-1 complex subunit beta-1 OS=Mus musculus (Mouse) OX=10090 GN=Ap1b1 PE=1 SV=2;>sp|Q9DBG3|AP2B1_MOUSE AP-2 complex subunit beta OS=Mus musculus (Mouse) OX=10090 GN=Ap2b1 PE=1 SV=1	AP1B1;AP2B1	19	14	-0.163044	0.00204744	0.00561257	FALSE	164	140	0.171127
Q9Z351	Q9Z351	>sp|Q9Z351|KCNQ2_MOUSE Potassium voltage-gated channel subfamily KQT member 2 OS=Mus musculus (Mouse) OX=10090 GN=Kcnq2 PE=1 SV=1	KCNQ2	3	1	-0.414834	0.144651	0.222356	FALSE	21	20	-0.057371
P41105	P41105	>sp|P41105|RL28_MOUSE 60S ribosomal protein L28 OS=Mus musculus (Mouse) OX=10090 GN=Rpl28 PE=1 SV=2	RPL28	3	3	0.789932	0.000638114	0.0020394	TRUE	29	23	0.300227
Q62421	Q62421	>sp|Q62421|SH3G3_MOUSE Endophilin-A3 OS=Mus musculus (Mouse) OX=10090 GN=Sh3gl3 PE=1 SV=1	SH3GL3	6	4	0.43546	2.6006e-05	0.000128347	TRUE	53	37	0.563394
P63011	P63011	>sp|P63011|RAB3A_MOUSE Ras-related protein Rab-3A OS=Mus musculus (Mouse) OX=10090 GN=Rab3a PE=1 SV=1	RAB3A	7	4	-0.0328564	0.568616	0.658781	FALSE	50	43	0.160634
Q8BM13	Q8BM13	>sp|Q8BM13|NOE2_MOUSE Noelin-2 OS=Mus musculus (Mouse) OX=10090 GN=Olfm2 PE=1 SV=2	OLFM2	2	1	-0.543582	0.00118223	0.00347669	TRUE	15	14	-0.0357378
Q9DCS2	Q9DCS2	>sp|Q9DCS2|MTL26_MOUSE Methyltransferase-like 26 OS=Mus musculus (Mouse) OX=10090 GN=Mettl26 PE=1 SV=1	METTL26	3	3	0.552046	4.06341e-05	0.000187228	TRUE	30	22	0.46548
Q8K212	Q8K212	>sp|Q8K212|PACS1_MOUSE Phosphofurin acidic cluster sorting protein 1 OS=Mus musculus (Mouse) OX=10090 GN=Pacs1 PE=1 SV=2	PACS1	20	17	-0.221908	0.00276779	0.00732397	FALSE	174	150	0.149503
A2ATJ4	A2ATJ4	>tr|A2ATJ4|A2ATJ4_MOUSE Olfactory receptor OS=Mus musculus (Mouse) OX=10090 GN=Olfr1200 PE=3 SV=1	OLFR1200	1	1	0.0445493	0.891349	0.921475	FALSE	10	6	0.811321
P17225	P17225	>sp|P17225|PTBP1_MOUSE Polypyrimidine tract-binding protein 1 OS=Mus musculus (Mouse) OX=10090 GN=Ptbp1 PE=1 SV=2	PTBP1	6	3	-0.472233	0.01444	0.031498	FALSE	40	39	-0.117317
P97496;Q6PDG5	P97496;Q6PDG5	>sp|P97496|SMRC1_MOUSE SWI/SNF complex subunit SMARCC1 OS=Mus musculus (Mouse) OX=10090 GN=Smarcc1 PE=1 SV=2;>sp|Q6PDG5|SMRC2_MOUSE SWI/SNF complex subunit SMARCC2 OS=Mus musculus (Mouse) OX=10090 GN=Smarcc2 PE=1 SV=2	SMARCC1;SMARCC2	5	4	-0.334312	0.00989802	0.0227453	FALSE	45	39	0.144973
Q9WUZ9	Q9WUZ9	>sp|Q9WUZ9|ENTP5_MOUSE Ectonucleoside triphosphate diphosphohydrolase 5 OS=Mus musculus (Mouse) OX=10090 GN=Entpd5 PE=1 SV=1	ENTPD5	4	0					13	19	-0.936459
P62874;P62880;Q61011	P62874;P62880;Q61011	>sp|P62874|GBB1_MOUSE Guanine nucleotide-binding protein G(I)/G(S)/G(T) subunit beta-1 OS=Mus musculus (Mouse) OX=10090 GN=Gnb1 PE=1 SV=3;>sp|P62880|GBB2_MOUSE Guanine nucleotide-binding protein G(I)/G(S)/G(T) subunit beta-2 OS=Mus musculus (Mouse) OX=10090 GN=Gnb2 PE=1 SV=3;>sp|Q61011|GBB3_MOUSE Guanine nucleotide-binding protein G(I)/G(S)/G(T) subunit beta-3 OS=Mus musculus (Mouse) OX=10090 GN=…	GNB1;GNB2;GNB3	1	1	-0.445814	0.000222079	0.000812391	TRUE	10	8	0.266117
Q6A026	Q6A026	>sp|Q6A026|PDS5A_MOUSE Sister chromatid cohesion protein PDS5 homolog A OS=Mus musculus (Mouse) OX=10090 GN=Pds5a PE=1 SV=3	PDS5A	7	3	0.227026	0.0544615	0.0967688	FALSE	51	40	0.345589
Q5SSL4	Q5SSL4	>sp|Q5SSL4|ABR_MOUSE Active breakpoint cluster region-related protein OS=Mus musculus (Mouse) OX=10090 GN=Abr PE=1 SV=1	ABR	17	7	-1.52616	1.56765e-15	1.69745e-12	TRUE	102	126	-0.591482
Q5KU39	Q5KU39	>sp|Q5KU39|VPS41_MOUSE Vacuolar protein sorting-associated protein 41 homolog OS=Mus musculus (Mouse) OX=10090 GN=Vps41 PE=1 SV=1	VPS41	11	4	-0.223286	0.0151098	0.032761	FALSE	73	70	-0.0726183
O08638;Q8VDD5	O08638;Q8VDD5	>sp|O08638|MYH11_MOUSE Myosin-11 OS=Mus musculus (Mouse) OX=10090 GN=Myh11 PE=1 SV=1;>sp|Q8VDD5|MYH9_MOUSE Myosin-9 OS=Mus musculus (Mouse) OX=10090 GN=Myh9 PE=1 SV=4	MYH11;MYH9	3	1	-0.164823	0.189949	0.278694	FALSE	25	21	0.168019
Q05CL8	Q05CL8	>sp|Q05CL8|LARP7_MOUSE La-related protein 7 OS=Mus musculus (Mouse) OX=10090 GN=Larp7 PE=1 SV=2	LARP7	6	2	0.226934	0.157738	0.238546	FALSE	49	24	1.29183
Q91V76	Q91V76	>sp|Q91V76|CK054_MOUSE Ester hydrolase C11orf54 homolog OS=Mus musculus (Mouse) OX=10090 GN=MGI:1918234 PE=1 SV=1	MGI:1918234	4	2	-0.765865	4.69438e-05	0.000211911	TRUE	17	25	-0.937246
Q9CPQ1	Q9CPQ1	>sp|Q9CPQ1|COX6C_MOUSE Cytochrome c oxidase subunit 6C OS=Mus musculus (Mouse) OX=10090 GN=Cox6c PE=1 SV=3	COX6C	2	2	-0.48781	0.0242165	0.0488844	FALSE	20	16	0.286542
Q9CTY5	Q9CTY5	>sp|Q9CTY5|MICU3_MOUSE Calcium uptake protein 3, mitochondrial OS=Mus musculus (Mouse) OX=10090 GN=Micu3 PE=2 SV=2	MICU3	15	11	-0.0517333	0.442535	0.54576	FALSE	126	112	0.0785048
Q5EG47	Q5EG47	>sp|Q5EG47|AAPK1_MOUSE 5'-AMP-activated protein kinase catalytic subunit alpha-1 OS=Mus musculus (Mouse) OX=10090 GN=Prkaa1 PE=1 SV=2	PRKAA1	5	2	-0.736112	7.46726e-06	4.37056e-05	TRUE	25	31	-0.581457
Q3UGY8	Q3UGY8	>sp|Q3UGY8|BIG3_MOUSE Brefeldin A-inhibited guanine nucleotide-exchange protein 3 OS=Mus musculus (Mouse) OX=10090 GN=Arfgef3 PE=1 SV=1	ARFGEF3	15	5	0.709098	0.012953	0.0286937	FALSE	111	65	0.929203
Q8C0E2	Q8C0E2	>sp|Q8C0E2|VP26B_MOUSE Vacuolar protein sorting-associated protein 26B OS=Mus musculus (Mouse) OX=10090 GN=Vps26b PE=1 SV=1	VPS26B	16	11	-0.311785	4.12301e-05	0.00018949	TRUE	130	117	0.0564749
Q8K4Z0	Q8K4Z0	>sp|Q8K4Z0|LGI2_MOUSE Leucine-rich repeat LGI family member 2 OS=Mus musculus (Mouse) OX=10090 GN=Lgi2 PE=2 SV=1	LGI2	14	8	0.615793	0.000170969	0.000644587	TRUE	115	80	0.587358
Q91V41	Q91V41	>sp|Q91V41|RAB14_MOUSE Ras-related protein Rab-14 OS=Mus musculus (Mouse) OX=10090 GN=Rab14 PE=1 SV=3	RAB14	17	11	-0.205765	0.0103933	0.0237224	FALSE	137	116	0.186233
A2CG49;Q0KL02	A2CG49;Q0KL02	>sp|A2CG49|KALRN_MOUSE Kalirin OS=Mus musculus (Mouse) OX=10090 GN=Kalrn PE=1 SV=1;>sp|Q0KL02|TRIO_MOUSE Triple functional domain protein OS=Mus musculus (Mouse) OX=10090 GN=Trio PE=1 SV=3	KALRN;TRIO	4	3	0.101638	0.53663	0.63159	FALSE	36	29	0.271347
Q9CZC8	Q9CZC8	>sp|Q9CZC8|SCRN1_MOUSE Secernin-1 OS=Mus musculus (Mouse) OX=10090 GN=Scrn1 PE=1 SV=1	SCRN1	12	7	-0.903722	5.85714e-11	2.87418e-09	TRUE	88	87	-0.123094
P0C027;P0C028	P0C027;P0C028	>sp|P0C027|NUD10_MOUSE Diphosphoinositol polyphosphate phosphohydrolase 3-alpha OS=Mus musculus (Mouse) OX=10090 GN=Nudt10 PE=1 SV=1;>sp|P0C028|NUD11_MOUSE Diphosphoinositol polyphosphate phosphohydrolase 3-beta OS=Mus musculus (Mouse) OX=10090 GN=Nudt11 PE=1 SV=1	NUDT10;NUDT11	5	4	0.414657	6.21046e-05	0.000267916	TRUE	47	37	0.321718
P50518	P50518	>sp|P50518|VATE1_MOUSE V-type proton ATPase subunit E 1 OS=Mus musculus (Mouse) OX=10090 GN=Atp6v1e1 PE=1 SV=2	ATP6V1E1	13	6	-0.0591346	0.303652	0.405671	FALSE	85	81	-0.055033
Q8R2H9	Q8R2H9	>sp|Q8R2H9|PHOP1_MOUSE Phosphoethanolamine/phosphocholine phosphatase OS=Mus musculus (Mouse) OX=10090 GN=Phospho1 PE=1 SV=1	PHOSPHO1	3	1	-0.904665	5.82787e-06	3.54518e-05	TRUE	14	17	-0.542685
B2RSH2;P08752;P50149;Q9DC51	B2RSH2;P08752;P50149;Q9DC51	>sp|B2RSH2|GNAI1_MOUSE Guanine nucleotide-binding protein G(i) subunit alpha-1 OS=Mus musculus (Mouse) OX=10090 GN=Gnai1 PE=1 SV=1;>sp|P08752|GNAI2_MOUSE Guanine nucleotide-binding protein G(i) subunit alpha-2 OS=Mus musculus (Mouse) OX=10090 GN=Gnai2 PE=1 SV=5;>sp|P50149|GNAT2_MOUSE Guanine nucleotide-binding protein G(t) subunit alpha-2 OS=Mus musculus (Mouse) OX=10090 GN=Gnat2 PE=2 SV=2;>sp|Q9…	GNAI1;GNAI2;GNAT2;GNAI3	3	1	0.244247	0.00696705	0.0166533	FALSE	18	18	-0.176151
Q3TWN3	Q3TWN3	>sp|Q3TWN3|CNNM2_MOUSE Metal transporter CNNM2 OS=Mus musculus (Mouse) OX=10090 GN=Cnnm2 PE=1 SV=3	CNNM2	4	1	-0.154497	0.335885	0.439353	FALSE	24	20	0.16749
Q9JJR9	Q9JJR9	>sp|Q9JJR9|NRIP3_MOUSE Nuclear receptor-interacting protein 3 OS=Mus musculus (Mouse) OX=10090 GN=Nrip3 PE=1 SV=1	NRIP3	2	1	-1.01786	1.56351e-08	2.41163e-07	TRUE	9	10	-0.341854
P61957	P61957	>sp|P61957|SUMO2_MOUSE Small ubiquitin-related modifier 2 OS=Mus musculus (Mouse) OX=10090 GN=Sumo2 PE=1 SV=1	SUMO2	2	1	0.223879	0.12946	0.201988	FALSE	14	15	-0.285822
Q9CZY3	Q9CZY3	>sp|Q9CZY3|UB2V1_MOUSE Ubiquitin-conjugating enzyme E2 variant 1 OS=Mus musculus (Mouse) OX=10090 GN=Ube2v1 PE=1 SV=1	UBE2V1	2	1	-1.99948	5.54647e-09	1.02487e-07	TRUE	10	12	-0.488347
Q9R1L5	Q9R1L5	>sp|Q9R1L5|MAST1_MOUSE Microtubule-associated serine/threonine-protein kinase 1 OS=Mus musculus (Mouse) OX=10090 GN=Mast1 PE=1 SV=3	MAST1	5	3	-0.0964594	0.538547	0.633147	FALSE	39	28	0.490562
Q920Q8	Q920Q8	>sp|Q920Q8|NS1BP_MOUSE Influenza virus NS1A-binding protein homolog OS=Mus musculus (Mouse) OX=10090 GN=Ivns1abp PE=1 SV=2	IVNS1ABP	1	1	-0.0131759	0.916512	0.938883	FALSE	10	8	0.266117
Q9CWE0	Q9CWE0	>sp|Q9CWE0|MFR1L_MOUSE Mitochondrial fission regulator 1-like OS=Mus musculus (Mouse) OX=10090 GN=Mtfr1l PE=1 SV=1	MTFR1L	6	4	-0.042974	0.589663	0.677655	FALSE	50	36	0.504576
Q68FG2	Q68FG2	>tr|Q68FG2|Q68FG2_MOUSE Spectrin beta chain OS=Mus musculus (Mouse) OX=10090 GN=Sptbn2 PE=1 SV=1	SPTBN2	53	20	-0.187803	0.594139	0.680878	FALSE	361	261	0.497077
Q8K2K6	Q8K2K6	>sp|Q8K2K6|AGFG1_MOUSE Arf-GAP domain and FG repeat-containing protein 1 OS=Mus musculus (Mouse) OX=10090 GN=Agfg1 PE=1 SV=2	AGFG1	9	6	-0.606224	1.24119e-06	9.28817e-06	TRUE	69	65	-0.0282633
Q6A068	Q6A068	>sp|Q6A068|CDC5L_MOUSE Cell division cycle 5-like protein OS=Mus musculus (Mouse) OX=10090 GN=Cdc5l PE=1 SV=2	CDC5L	9	5	0.0362521	0.687932	0.75932	FALSE	68	59	0.13917
Q8C7H1	Q8C7H1	>sp|Q8C7H1|MMAA_MOUSE Methylmalonic aciduria type A homolog, mitochondrial OS=Mus musculus (Mouse) OX=10090 GN=Mmaa PE=1 SV=1	MMAA	8	6	0.296271	4.38258e-05	0.00020023	TRUE	71	56	0.313373
Q7TPR4	Q7TPR4	>sp|Q7TPR4|ACTN1_MOUSE Alpha-actinin-1 OS=Mus musculus (Mouse) OX=10090 GN=Actn1 PE=1 SV=1	ACTN1	26	16	-1.03052	5.01812e-09	9.46624e-08	TRUE	184	195	-0.27283
Q02248	Q02248	>sp|Q02248|CTNB1_MOUSE Catenin beta-1 OS=Mus musculus (Mouse) OX=10090 GN=Ctnnb1 PE=1 SV=1	CTNNB1	20	16	-0.264458	0.000139411	0.000541444	TRUE	173	147	0.180841
P62482;P63143	P62482;P63143	>sp|P62482|KCAB2_MOUSE Voltage-gated potassium channel subunit beta-2 OS=Mus musculus (Mouse) OX=10090 GN=Kcnab2 PE=1 SV=1;>sp|P63143|KCAB1_MOUSE Voltage-gated potassium channel subunit beta-1 OS=Mus musculus (Mouse) OX=10090 GN=Kcnab1 PE=1 SV=2	KCNAB2;KCNAB1	2	2	-0.545994	0.0040814	0.0102919	FALSE	18	16	0.0679754
Q99L27	Q99L27	>sp|Q99L27|GMPR2_MOUSE GMP reductase 2 OS=Mus musculus (Mouse) OX=10090 GN=Gmpr2 PE=1 SV=2	GMPR2	3	3	0.0897934	0.402827	0.507465	FALSE	28	22	0.33287
O35343;O35344	O35343;O35344	>sp|O35343|IMA3_MOUSE Importin subunit alpha-3 OS=Mus musculus (Mouse) OX=10090 GN=Kpna4 PE=1 SV=1;>sp|O35344|IMA4_MOUSE Importin subunit alpha-4 OS=Mus musculus (Mouse) OX=10090 GN=Kpna3 PE=1 SV=1	KPNA4;KPNA3	3	3	-0.510516	2.86875e-05	0.000138841	TRUE	30	24	0.293811
Q91Z38	Q91Z38	>sp|Q91Z38|TTC1_MOUSE Tetratricopeptide repeat protein 1 OS=Mus musculus (Mouse) OX=10090 GN=Ttc1 PE=1 SV=1	TTC1	6	3	-0.328736	0.0106872	0.0242703	FALSE	42	37	0.0856292
Q9WV03	Q9WV03	>sp|Q9WV03|FA50A_MOUSE Protein FAM50A OS=Mus musculus (Mouse) OX=10090 GN=Fam50a PE=1 SV=1	FAM50A	2	1	-0.622464	5.20656e-05	0.000231431	TRUE	14	12	0.175476
Q3U0M1	Q3U0M1	>sp|Q3U0M1|TPPC9_MOUSE Trafficking protein particle complex subunit 9 OS=Mus musculus (Mouse) OX=10090 GN=Trappc9 PE=1 SV=2	TRAPPC9	16	12	-0.0644284	0.313365	0.415518	FALSE	144	113	0.350645
Q8VC30	Q8VC30	>sp|Q8VC30|TKFC_MOUSE Triokinase/FMN cyclase OS=Mus musculus (Mouse) OX=10090 GN=Tkfc PE=1 SV=1	TKFC	11	6	0.338473	0.00011513	0.00046103	TRUE	93	67	0.514997
O08599	O08599	>sp|O08599|STXB1_MOUSE Syntaxin-binding protein 1 OS=Mus musculus (Mouse) OX=10090 GN=Stxbp1 PE=1 SV=2	STXBP1	40	27	0.127845	0.0323983	0.062495	FALSE	329	279	0.186651
O88512;P22892	O88512;P22892	>sp|O88512|AP1G2_MOUSE AP-1 complex subunit gamma-like 2 OS=Mus musculus (Mouse) OX=10090 GN=Ap1g2 PE=1 SV=2;>sp|P22892|AP1G1_MOUSE AP-1 complex subunit gamma-1 OS=Mus musculus (Mouse) OX=10090 GN=Ap1g1 PE=1 SV=3	AP1G2;AP1G1	1	1	-0.381072	0.0227758	0.0465666	FALSE	10	8	0.266117
Q8R4S0	Q8R4S0	>sp|Q8R4S0|PP14C_MOUSE Protein phosphatase 1 regulatory subunit 14C OS=Mus musculus (Mouse) OX=10090 GN=Ppp1r14c PE=1 SV=1	PPP1R14C	2	2	-0.0713459	0.646563	0.725792	FALSE	18	16	0.0466096
O54946;Q9QYI8	O54946;Q9QYI8	>sp|O54946|DNJB6_MOUSE DnaJ homolog subfamily B member 6 OS=Mus musculus (Mouse) OX=10090 GN=Dnajb6 PE=1 SV=4;>sp|Q9QYI8|DNJB7_MOUSE DnaJ homolog subfamily B member 7 OS=Mus musculus (Mouse) OX=10090 GN=Dnajb7 PE=2 SV=2	DNAJB6;DNAJB7	1	1	-0.114925	0.243914	0.340172	FALSE	10	8	0.266117
Q8CHS8	Q8CHS8	>sp|Q8CHS8|VP37A_MOUSE Vacuolar protein sorting-associated protein 37A OS=Mus musculus (Mouse) OX=10090 GN=Vps37a PE=1 SV=1	VPS37A	1	0					5	7	-0.812753
Q3UA37	Q3UA37	>sp|Q3UA37|QRIC1_MOUSE Glutamine-rich protein 1 OS=Mus musculus (Mouse) OX=10090 GN=Qrich1 PE=1 SV=1	QRICH1	5	1	-0.291277	0.212717	0.305478	FALSE	22	21	-0.0466772
P61315	P61315	>sp|P61315|G3ST3_MOUSE Galactose-3-O-sulfotransferase 3 OS=Mus musculus (Mouse) OX=10090 GN=Gal3st3 PE=2 SV=1	GAL3ST3	2	0					6	12	-1.43186
Q64475	Q64475	>sp|Q64475|H2B1B_MOUSE Histone H2B type 1-B OS=Mus musculus (Mouse) OX=10090 GN=Hist1h2bb PE=1 SV=3	HIST1H2BB	7	5	0.374903	0.0456436	0.0832876	FALSE	61	48	0.337639
Q80ZM5	Q80ZM5	>tr|Q80ZM5|Q80ZM5_MOUSE H15 domain-containing protein OS=Mus musculus (Mouse) OX=10090 GN=H1f10 PE=1 SV=1	H1F10	3	2	0.166661	0.248689	0.345497	FALSE	26	20	0.370665
Q9DBG3	Q9DBG3	>sp|Q9DBG3|AP2B1_MOUSE AP-2 complex subunit beta OS=Mus musculus (Mouse) OX=10090 GN=Ap2b1 PE=1 SV=1	AP2B1	26	18	-0.178347	0.00203238	0.00557693	FALSE	208	181	0.133345
Q91VD9	Q91VD9	>sp|Q91VD9|NDUS1_MOUSE NADH-ubiquinone oxidoreductase 75 kDa subunit, mitochondrial OS=Mus musculus (Mouse) OX=10090 GN=Ndufs1 PE=1 SV=2	NDUFS1	33	29	-0.235103	1.13565e-05	6.2357e-05	FALSE	304	245	0.294222
Q8JZU2	Q8JZU2	>sp|Q8JZU2|TXTP_MOUSE Tricarboxylate transport protein, mitochondrial OS=Mus musculus (Mouse) OX=10090 GN=Slc25a1 PE=1 SV=1	SLC25A1	8	7	-0.331495	0.000171187	0.000644958	TRUE	72	57	0.320264
Q8CFA2	Q8CFA2	>sp|Q8CFA2|GCST_MOUSE Aminomethyltransferase, mitochondrial OS=Mus musculus (Mouse) OX=10090 GN=Amt PE=1 SV=1	AMT	4	0					11	20	-1.35533
O88951;O88952;Q8JZS0	O88951;O88952;Q8JZS0	>sp|O88951|LIN7B_MOUSE Protein lin-7 homolog B OS=Mus musculus (Mouse) OX=10090 GN=Lin7b PE=1 SV=2;>sp|O88952|LIN7C_MOUSE Protein lin-7 homolog C OS=Mus musculus (Mouse) OX=10090 GN=Lin7c PE=1 SV=2;>sp|Q8JZS0|LIN7A_MOUSE Protein lin-7 homolog A OS=Mus musculus (Mouse) OX=10090 GN=Lin7a PE=1 SV=2	LIN7B;LIN7C;LIN7A	3	2	-0.609902	1.56301e-06	1.13847e-05	TRUE	24	22	0.00954839
Q91YM2	Q91YM2	>sp|Q91YM2|RHG35_MOUSE Rho GTPase-activating protein 35 OS=Mus musculus (Mouse) OX=10090 GN=Arhgap35 PE=1 SV=3	ARHGAP35	25	15	-0.188167	0.0179296	0.0379629	FALSE	171	166	-0.0952515
O35387	O35387	>sp|O35387|HAX1_MOUSE HCLS1-associated protein X-1 OS=Mus musculus (Mouse) OX=10090 GN=Hax1 PE=1 SV=1	HAX1	4	1	0.0204004	0.909052	0.933891	FALSE	32	24	0.419303
Q8R180;Q8R2E9	Q8R180;Q8R2E9	>sp|Q8R180|ERO1A_MOUSE ERO1-like protein alpha OS=Mus musculus (Mouse) OX=10090 GN=Ero1a PE=1 SV=2;>sp|Q8R2E9|ERO1B_MOUSE ERO1-like protein beta OS=Mus musculus (Mouse) OX=10090 GN=Ero1b PE=1 SV=1	ERO1A;ERO1B	1	1	-0.499993	0.0120261	0.0269158	FALSE	9	8	0.0717842
Q8R1T1	Q8R1T1	>sp|Q8R1T1|CHMP7_MOUSE Charged multivesicular body protein 7 OS=Mus musculus (Mouse) OX=10090 GN=Chmp7 PE=1 SV=1	CHMP7	7	0					29	40	-0.81024
Q9D7N6	Q9D7N6	>sp|Q9D7N6|RM30_MOUSE 39S ribosomal protein L30, mitochondrial OS=Mus musculus (Mouse) OX=10090 GN=Mrpl30 PE=1 SV=1	MRPL30	2	2	0.0919491	0.616793	0.70104	FALSE	18	15	0.204769
Q05186	Q05186	>sp|Q05186|RCN1_MOUSE Reticulocalbin-1 OS=Mus musculus (Mouse) OX=10090 GN=Rcn1 PE=1 SV=1	RCN1	10	1	-0.767052	4.3773e-06	2.76531e-05	TRUE	30	55	-1.39169
P54728	P54728	>sp|P54728|RD23B_MOUSE UV excision repair protein RAD23 homolog B OS=Mus musculus (Mouse) OX=10090 GN=Rad23b PE=1 SV=2	RAD23B	11	5	-0.700631	6.20029e-08	7.66401e-07	TRUE	78	74	-0.0488992
Q6NZL0	Q6NZL0	>sp|Q6NZL0|SOGA3_MOUSE Protein SOGA3 OS=Mus musculus (Mouse) OX=10090 GN=Soga3 PE=1 SV=2	SOGA3	28	20	-0.432316	1.99653e-09	4.58019e-08	TRUE	228	202	0.0935918
Q9JMK2	Q9JMK2	>sp|Q9JMK2|KC1E_MOUSE Casein kinase I isoform epsilon OS=Mus musculus (Mouse) OX=10090 GN=Csnk1e PE=1 SV=2	CSNK1E	3	1	-1.14642	5.91957e-05	0.000257211	TRUE	22	22	-0.156634
O55013	O55013	>sp|O55013|TPPC3_MOUSE Trafficking protein particle complex subunit 3 OS=Mus musculus (Mouse) OX=10090 GN=Trappc3 PE=1 SV=1	TRAPPC3	7	5	-0.0679331	0.268058	0.368062	FALSE	62	54	0.117672
P14152	P14152	>sp|P14152|MDHC_MOUSE Malate dehydrogenase, cytoplasmic OS=Mus musculus (Mouse) OX=10090 GN=Mdh1 PE=1 SV=3	MDH1	9	8	-0.524575	5.30609e-07	4.60852e-06	TRUE	85	70	0.250014
Q3UHD6	Q3UHD6	>sp|Q3UHD6|SNX27_MOUSE Sorting nexin-27 OS=Mus musculus (Mouse) OX=10090 GN=Snx27 PE=1 SV=2	SNX27	12	8	-0.521032	1.46654e-09	3.57651e-08	TRUE	97	87	0.0665836
P52196	P52196	>sp|P52196|THTR_MOUSE Thiosulfate sulfurtransferase OS=Mus musculus (Mouse) OX=10090 GN=Tst PE=1 SV=3	TST	7	3	-0.859576	2.26471e-07	2.23336e-06	TRUE	50	49	-0.118042
Q91XX1	Q91XX1	>tr|Q91XX1|Q91XX1_MOUSE Protocadherin gamma C3 OS=Mus musculus (Mouse) OX=10090 GN=Pcdhgc3 PE=1 SV=1	PCDHGC3	5	1	-0.514737	0.00408953	0.0103076	FALSE	23	26	-0.411112
P16332	P16332	>sp|P16332|MUTA_MOUSE Methylmalonyl-CoA mutase, mitochondrial OS=Mus musculus (Mouse) OX=10090 GN=Mmut PE=1 SV=2	MMUT	16	16	-0.09828	0.0887446	0.146304	FALSE	159	126	0.32625
Q9DBJ1	Q9DBJ1	>sp|Q9DBJ1|PGAM1_MOUSE Phosphoglycerate mutase 1 OS=Mus musculus (Mouse) OX=10090 GN=Pgam1 PE=1 SV=3	PGAM1	9	8	-0.252291	0.000352494	0.00121168	FALSE	84	68	0.28079
P63242;Q8BGY2	P63242;Q8BGY2	>sp|P63242|IF5A1_MOUSE Eukaryotic translation initiation factor 5A-1 OS=Mus musculus (Mouse) OX=10090 GN=Eif5a PE=1 SV=2;>sp|Q8BGY2|IF5A2_MOUSE Eukaryotic translation initiation factor 5A-2 OS=Mus musculus (Mouse) OX=10090 GN=Eif5a2 PE=1 SV=3	EIF5A;EIF5A2	1	1	0.0572728	0.859852	0.899011	FALSE	10	8	0.266117
Q3TW96;Q91YN5	Q3TW96;Q91YN5	>sp|Q3TW96|UAP1L_MOUSE UDP-N-acetylhexosamine pyrophosphorylase-like protein 1 OS=Mus musculus (Mouse) OX=10090 GN=Uap1l1 PE=1 SV=1;>sp|Q91YN5|UAP1_MOUSE UDP-N-acetylhexosamine pyrophosphorylase OS=Mus musculus (Mouse) OX=10090 GN=Uap1 PE=1 SV=1	UAP1L1;UAP1	1	1	0.0744174	0.590124	0.677898	FALSE	10	8	0.266117
Q8BFR4	Q8BFR4	>sp|Q8BFR4|GNS_MOUSE N-acetylglucosamine-6-sulfatase OS=Mus musculus (Mouse) OX=10090 GN=Gns PE=1 SV=1	GNS	9	7	-0.487255	4.5081e-05	0.000204927	TRUE	73	65	0.0876573
Q60598	Q60598	>sp|Q60598|SRC8_MOUSE Src substrate cortactin OS=Mus musculus (Mouse) OX=10090 GN=Cttn PE=1 SV=2	CTTN	19	15	-1.22823	1.70703e-12	2.31046e-10	TRUE	162	147	0.0523851
Q9D385	Q9D385	>sp|Q9D385|AR2BP_MOUSE ADP-ribosylation factor-like protein 2-binding protein OS=Mus musculus (Mouse) OX=10090 GN=Arl2bp PE=1 SV=1	ARL2BP	2	1	-0.428841	0.00317295	0.00823508	TRUE	11	14	-0.595643
Q4VAA2	Q4VAA2	>sp|Q4VAA2|CDV3_MOUSE Protein CDV3 OS=Mus musculus (Mouse) OX=10090 GN=Cdv3 PE=1 SV=2	CDV3	6	2	-0.849695	1.06363e-06	8.19129e-06	TRUE	43	38	0.103565
Q9CRT8	Q9CRT8	>sp|Q9CRT8|XPOT_MOUSE Exportin-T OS=Mus musculus (Mouse) OX=10090 GN=Xpot PE=1 SV=3	XPOT	15	8	0.176222	0.0284546	0.05606	FALSE	115	86	0.431026
E9PXQ7	E9PXQ7	>tr|E9PXQ7|E9PXQ7_MOUSE Protocadherin 10 OS=Mus musculus (Mouse) OX=10090 GN=Pcdh10 PE=1 SV=1	PCDH10	6	0					12	26	-1.67421
Q3UN02	Q3UN02	>sp|Q3UN02|LCLT1_MOUSE Lysocardiolipin acyltransferase 1 OS=Mus musculus (Mouse) OX=10090 GN=Lclat1 PE=1 SV=2	LCLAT1	5	5	-0.480126	3.25469e-07	3.0486e-06	TRUE	47	39	0.217186
B9EJ86;Q9ER64	B9EJ86;Q9ER64	>sp|B9EJ86|OSBL8_MOUSE Oxysterol-binding protein-related protein 8 OS=Mus musculus (Mouse) OX=10090 GN=Osbpl8 PE=1 SV=1;>sp|Q9ER64|OSBL5_MOUSE Oxysterol-binding protein-related protein 5 OS=Mus musculus (Mouse) OX=10090 GN=Osbpl5 PE=1 SV=3	OSBPL8;OSBPL5	2	1	0.174225	0.233639	0.328978	FALSE	20	13	0.709406
Q6P2B1	Q6P2B1	>sp|Q6P2B1|TNPO3_MOUSE Transportin-3 OS=Mus musculus (Mouse) OX=10090 GN=Tnpo3 PE=1 SV=1	TNPO3	9	6	-0.381942	0.00270693	0.00718398	TRUE	71	57	0.276058
Q0VGU4	Q0VGU4	>sp|Q0VGU4|VGF_MOUSE Neurosecretory protein VGF OS=Mus musculus (Mouse) OX=10090 GN=Vgf PE=1 SV=1	VGF	20	13	0.55614	0.000329849	0.00114843	TRUE	179	129	0.522081
Q9DCL8	Q9DCL8	>sp|Q9DCL8|IPP2_MOUSE Protein phosphatase inhibitor 2 OS=Mus musculus (Mouse) OX=10090 GN=Ppp1r2 PE=1 SV=3	PPP1R2	4	0					10	26	-2.07299
Q8R3B1	Q8R3B1	>sp|Q8R3B1|PLCD1_MOUSE 1-phosphatidylinositol 4,5-bisphosphate phosphodiesterase delta-1 OS=Mus musculus (Mouse) OX=10090 GN=Plcd1 PE=1 SV=2	PLCD1	9	5	-0.112612	0.181602	0.268192	FALSE	64	57	0.0825504
Q9EPL2	Q9EPL2	>sp|Q9EPL2|CSTN1_MOUSE Calsyntenin-1 OS=Mus musculus (Mouse) OX=10090 GN=Clstn1 PE=1 SV=1	CLSTN1	9	8	-0.140542	0.0857423	0.142221	FALSE	80	66	0.244149
Q8R1Y2	Q8R1Y2	>sp|Q8R1Y2|MERB1_MOUSE bMERB domain-containing protein 1 OS=Mus musculus (Mouse) OX=10090 GN=Bmerb1 PE=1 SV=1	BMERB1	2	2	-0.0350596	0.743721	0.803694	FALSE	19	14	0.44044
Q8CHT1	Q8CHT1	>sp|Q8CHT1|NGEF_MOUSE Ephexin-1 OS=Mus musculus (Mouse) OX=10090 GN=Ngef PE=1 SV=1	NGEF	15	5	0.307937	0.00117757	0.00346677	TRUE	111	75	0.643358
Q63739	Q63739	>sp|Q63739|TP4A1_MOUSE Protein tyrosine phosphatase type IVA 1 OS=Mus musculus (Mouse) OX=10090 GN=Ptp4a1 PE=1 SV=1	PTP4A1	2	2	-0.259324	0.158174	0.238938	FALSE	16	15	-0.0230394
B1AVZ0	B1AVZ0	>sp|B1AVZ0|UPP_MOUSE Uracil phosphoribosyltransferase homolog OS=Mus musculus (Mouse) OX=10090 GN=Uprt PE=1 SV=1	UPRT	4	1	-0.385157	0.00365994	0.00934666	TRUE	20	21	-0.250609
Q8K1X1	Q8K1X1	>sp|Q8K1X1|WDR11_MOUSE WD repeat-containing protein 11 OS=Mus musculus (Mouse) OX=10090 GN=Wdr11 PE=1 SV=1	WDR11	9	5	-0.105884	0.10516	0.169445	FALSE	69	61	0.103526
Q3TEA8	Q3TEA8	>sp|Q3TEA8|HP1B3_MOUSE Heterochromatin protein 1-binding protein 3 OS=Mus musculus (Mouse) OX=10090 GN=Hp1bp3 PE=1 SV=1	HP1BP3	11	10	0.429694	0.00760655	0.0180306	FALSE	106	80	0.425412
Q8BGD9	Q8BGD9	>sp|Q8BGD9|IF4B_MOUSE Eukaryotic translation initiation factor 4B OS=Mus musculus (Mouse) OX=10090 GN=Eif4b PE=1 SV=1	EIF4B	7	3	-0.543656	8.48822e-05	0.000350536	TRUE	44	43	-0.110876
Q9D868	Q9D868	>sp|Q9D868|PPIH_MOUSE Peptidyl-prolyl cis-trans isomerase H OS=Mus musculus (Mouse) OX=10090 GN=Ppih PE=1 SV=1	PPIH	4	2	0.351685	0.00606601	0.0147535	FALSE	36	25	0.587175
P26040;P26041;P26043	P26040;P26041;P26043	>sp|P26040|EZRI_MOUSE Ezrin OS=Mus musculus (Mouse) OX=10090 GN=Ezr PE=1 SV=3;>sp|P26041|MOES_MOUSE Moesin OS=Mus musculus (Mouse) OX=10090 GN=Msn PE=1 SV=3;>sp|P26043|RADI_MOUSE Radixin OS=Mus musculus (Mouse) OX=10090 GN=Rdx PE=1 SV=3	EZR;MSN;RDX	10	7	-0.562589	6.29484e-07	5.27558e-06	TRUE	78	68	0.127655
Q8R317	Q8R317	>sp|Q8R317|UBQL1_MOUSE Ubiquilin-1 OS=Mus musculus (Mouse) OX=10090 GN=Ubqln1 PE=1 SV=1	UBQLN1	6	4	-0.653224	5.04251e-08	6.51555e-07	TRUE	48	44	0.0371079
A2A699	A2A699	>sp|A2A699|F1712_MOUSE Protein FAM171A2 OS=Mus musculus (Mouse) OX=10090 GN=Fam171a2 PE=1 SV=1	FAM171A2	14	8	0.030289	0.714565	0.781704	FALSE	108	88	0.260515
Q8BGP6	Q8BGP6	>sp|Q8BGP6|S2540_MOUSE Solute carrier family 25 member 40 OS=Mus musculus (Mouse) OX=10090 GN=Slc25a40 PE=1 SV=1	SLC25A40	3	1	0.386749	0.0070353	0.0168015	FALSE	22	20	0.0235751
Q9JLY7	Q9JLY7	>sp|Q9JLY7|DUS14_MOUSE Dual specificity protein phosphatase 14 OS=Mus musculus (Mouse) OX=10090 GN=Dusp14 PE=2 SV=2	DUSP14	1	1	0.529161	0.00186979	0.00517803	TRUE	10	6	0.80091
Q62264	Q62264	>sp|Q62264|THRSP_MOUSE Thyroid hormone-inducible hepatic protein OS=Mus musculus (Mouse) OX=10090 GN=Thrsp PE=1 SV=1	THRSP	1	1	-0.572595	0.00335521	0.00865417	TRUE	8	8	-0.183799
P63046	P63046	>sp|P63046|ST4A1_MOUSE Sulfotransferase 4A1 OS=Mus musculus (Mouse) OX=10090 GN=Sult4a1 PE=1 SV=1	SULT4A1	7	4	-0.607367	6.60775e-07	5.51766e-06	TRUE	55	52	-0.0484956
Q8BIE6	Q8BIE6	>sp|Q8BIE6|FRM4A_MOUSE FERM domain-containing protein 4A OS=Mus musculus (Mouse) OX=10090 GN=Frmd4a PE=1 SV=2	FRMD4A	11	1	-0.0472067	0.651373	0.730131	FALSE	36	73	-1.58847
P48036	P48036	>sp|P48036|ANXA5_MOUSE Annexin A5 OS=Mus musculus (Mouse) OX=10090 GN=Anxa5 PE=1 SV=1	ANXA5	18	9	-1.06835	9.91981e-11	4.19577e-09	TRUE	115	124	-0.317096
Q7TMQ7	Q7TMQ7	>sp|Q7TMQ7|WDR91_MOUSE WD repeat-containing protein 91 OS=Mus musculus (Mouse) OX=10090 GN=Wdr91 PE=1 SV=1	WDR91	8	4	-0.193493	0.0644759	0.111782	FALSE	60	51	0.181294
Q8VE47	Q8VE47	>sp|Q8VE47|UBA5_MOUSE Ubiquitin-like modifier-activating enzyme 5 OS=Mus musculus (Mouse) OX=10090 GN=Uba5 PE=1 SV=2	UBA5	10	7	-0.526824	1.53418e-07	1.62863e-06	TRUE	71	70	-0.132906
Q61097	Q61097	>sp|Q61097|KSR1_MOUSE Kinase suppressor of Ras 1 OS=Mus musculus (Mouse) OX=10090 GN=Ksr1 PE=1 SV=1	KSR1	6	2	-1.13091	4.05213e-09	8.12526e-08	TRUE	35	46	-0.708748
P47753;P47754	P47753;P47754	>sp|P47753|CAZA1_MOUSE F-actin-capping protein subunit alpha-1 OS=Mus musculus (Mouse) OX=10090 GN=Capza1 PE=1 SV=4;>sp|P47754|CAZA2_MOUSE F-actin-capping protein subunit alpha-2 OS=Mus musculus (Mouse) OX=10090 GN=Capza2 PE=1 SV=3	CAPZA1;CAPZA2	2	2	-0.293716	0.00229697	0.00622708	TRUE	20	16	0.286542
Q61220	Q61220	>sp|Q61220|NELL2_MOUSE Protein kinase C-binding protein NELL2 OS=Mus musculus (Mouse) OX=10090 GN=Nell2 PE=1 SV=3	NELL2	5	4	-0.187967	0.0635941	0.110636	FALSE	44	37	0.190293
O08997	O08997	>sp|O08997|ATOX1_MOUSE Copper transport protein ATOX1 OS=Mus musculus (Mouse) OX=10090 GN=Atox1 PE=1 SV=1	ATOX1	3	1	-0.456478	0.0236549	0.0479834	FALSE	17	15	0.107711
Q8C0J2	Q8C0J2	>sp|Q8C0J2|A16L1_MOUSE Autophagy-related protein 16-1 OS=Mus musculus (Mouse) OX=10090 GN=Atg16l1 PE=1 SV=1	ATG16L1	4	2	-0.42142	0.00279515	0.00738191	TRUE	27	26	-0.0788902
Q99KL7	Q99KL7	>sp|Q99KL7|RAB28_MOUSE Ras-related protein Rab-28 OS=Mus musculus (Mouse) OX=10090 GN=Rab28 PE=1 SV=1	RAB28	3	0					14	17	-0.553903
Q04735;Q8K0D0	Q04735;Q8K0D0	>sp|Q04735|CDK16_MOUSE Cyclin-dependent kinase 16 OS=Mus musculus (Mouse) OX=10090 GN=Cdk16 PE=1 SV=1;>sp|Q8K0D0|CDK17_MOUSE Cyclin-dependent kinase 17 OS=Mus musculus (Mouse) OX=10090 GN=Cdk17 PE=1 SV=2	CDK16;CDK17	3	2	-0.603889	7.69721e-05	0.000322544	TRUE	20	22	-0.346218
Q8CCK0;Q9QZQ8	Q8CCK0;Q9QZQ8	>sp|Q8CCK0|H2AW_MOUSE Core histone macro-H2A.2 OS=Mus musculus (Mouse) OX=10090 GN=H2afy2 PE=1 SV=3;>sp|Q9QZQ8|H2AY_MOUSE Core histone macro-H2A.1 OS=Mus musculus (Mouse) OX=10090 GN=H2afy PE=1 SV=3	H2AFY2;H2AFY	2	2	0.586496	0.0105717	0.0240584	FALSE	20	16	0.286542
Q9Z2I8	Q9Z2I8	>sp|Q9Z2I8|SUCB2_MOUSE Succinate--CoA ligase [GDP-forming] subunit beta, mitochondrial OS=Mus musculus (Mouse) OX=10090 GN=Suclg2 PE=1 SV=3	SUCLG2	15	8	-0.745338	9.07607e-07	7.18389e-06	TRUE	108	113	-0.270599
Q8K0U4;Q9CZJ2	Q8K0U4;Q9CZJ2	>sp|Q8K0U4|HS12A_MOUSE Heat shock 70 kDa protein 12A OS=Mus musculus (Mouse) OX=10090 GN=Hspa12a PE=1 SV=1;>sp|Q9CZJ2|HS12B_MOUSE Heat shock 70 kDa protein 12B OS=Mus musculus (Mouse) OX=10090 GN=Hspa12b PE=1 SV=1	HSPA12A;HSPA12B	2	1	-1.28233	9.29829e-08	1.0657e-06	TRUE	14	15	-0.312466
Q91V01	Q91V01	>sp|Q91V01|MBOA5_MOUSE Lysophospholipid acyltransferase 5 OS=Mus musculus (Mouse) OX=10090 GN=Lpcat3 PE=1 SV=1	LPCAT3	4	0					18	24	-0.758204
P70407;P70408	P70407;P70408	>sp|P70407|CADH9_MOUSE Cadherin-9 OS=Mus musculus (Mouse) OX=10090 GN=Cdh9 PE=2 SV=2;>sp|P70408|CAD10_MOUSE Cadherin-10 OS=Mus musculus (Mouse) OX=10090 GN=Cdh10 PE=1 SV=3	CDH9;CDH10	1	0					6	7	-0.468167
Q8CIB5	Q8CIB5	>sp|Q8CIB5|FERM2_MOUSE Fermitin family homolog 2 OS=Mus musculus (Mouse) OX=10090 GN=Fermt2 PE=1 SV=1	FERMT2	16	3	-0.968357	9.59598e-11	4.13056e-09	TRUE	77	100	-0.713531
Q8CI71	Q8CI71	>sp|Q8CI71|VPS50_MOUSE Syndetin OS=Mus musculus (Mouse) OX=10090 GN=Vps50 PE=1 SV=2	VPS50	18	15	-0.133868	0.0126932	0.0282221	FALSE	165	136	0.240156
P46638	P46638	>sp|P46638|RB11B_MOUSE Ras-related protein Rab-11B OS=Mus musculus (Mouse) OX=10090 GN=Rab11b PE=1 SV=3	RAB11B	3	2	-0.415231	0.00065255	0.00207696	TRUE	24	24	-0.161957
Q8VCS3	Q8VCS3	>sp|Q8VCS3|XYLK_MOUSE Glycosaminoglycan xylosylkinase OS=Mus musculus (Mouse) OX=10090 GN=Fam20b PE=1 SV=1	FAM20B	5	1	-0.375808	0.0725484	0.123943	FALSE	26	31	-0.528896
Q60790	Q60790	>sp|Q60790|RASA3_MOUSE Ras GTPase-activating protein 3 OS=Mus musculus (Mouse) OX=10090 GN=Rasa3 PE=1 SV=2	RASA3	22	9	-0.724724	5.27249e-12	5.00794e-10	TRUE	121	147	-0.561932
P12970	P12970	>sp|P12970|RL7A_MOUSE 60S ribosomal protein L7a OS=Mus musculus (Mouse) OX=10090 GN=Rpl7a PE=1 SV=2	RPL7A	10	10	1.09518	9.0153e-06	5.12698e-05	TRUE	100	78	0.357272
Q8C052	Q8C052	>sp|Q8C052|MAP1S_MOUSE Microtubule-associated protein 1S OS=Mus musculus (Mouse) OX=10090 GN=Map1s PE=1 SV=2	MAP1S	11	7	0.0961082	0.0986572	0.160015	FALSE	84	73	0.132503
Q9D5V6	Q9D5V6	>sp|Q9D5V6|SYAP1_MOUSE Synapse-associated protein 1 OS=Mus musculus (Mouse) OX=10090 GN=Syap1 PE=1 SV=1	SYAP1	4	0					10	29	-2.2266
Q8BRK8	Q8BRK8	>sp|Q8BRK8|AAPK2_MOUSE 5'-AMP-activated protein kinase catalytic subunit alpha-2 OS=Mus musculus (Mouse) OX=10090 GN=Prkaa2 PE=1 SV=3	PRKAA2	4	1	-0.417821	0.0588013	0.103327	FALSE	25	32	-0.705786
Q9CPR7	Q9CPR7	>sp|Q9CPR7|SIKE1_MOUSE Suppressor of IKBKE 1 OS=Mus musculus (Mouse) OX=10090 GN=Sike1 PE=1 SV=1	SIKE1	1	0					4	7	-1.16132
Q9QXL2	Q9QXL2	>sp|Q9QXL2|KI21A_MOUSE Kinesin-like protein KIF21A OS=Mus musculus (Mouse) OX=10090 GN=Kif21a PE=1 SV=2	KIF21A	13	9	0.71871	9.22908e-05	0.000378532	TRUE	111	80	0.509018
P63323	P63323	>sp|P63323|RS12_MOUSE 40S ribosomal protein S12 OS=Mus musculus (Mouse) OX=10090 GN=Rps12 PE=1 SV=2	RPS12	2	2	-0.353595	0.01014	0.0232322	FALSE	20	16	0.286542
Q99JF8	Q99JF8	>sp|Q99JF8|PSIP1_MOUSE PC4 and SFRS1-interacting protein OS=Mus musculus (Mouse) OX=10090 GN=Psip1 PE=1 SV=1	PSIP1	13	9	-0.117703	0.147533	0.226209	FALSE	109	88	0.288165
Q6ZPE2	Q6ZPE2	>sp|Q6ZPE2|MTMR5_MOUSE Myotubularin-related protein 5 OS=Mus musculus (Mouse) OX=10090 GN=Sbf1 PE=1 SV=2	SBF1	28	13	0.43692	0.0975813	0.158555	FALSE	231	147	0.757243
Q9DBG9	Q9DBG9	>sp|Q9DBG9|TX1B3_MOUSE Tax1-binding protein 3 OS=Mus musculus (Mouse) OX=10090 GN=Tax1bp3 PE=1 SV=1	TAX1BP3	1	1	-0.00908712	0.938856	0.954727	FALSE	8	8	-0.164901
Q8C6G8	Q8C6G8	>sp|Q8C6G8|WDR26_MOUSE WD repeat-containing protein 26 OS=Mus musculus (Mouse) OX=10090 GN=Wdr26 PE=1 SV=3	WDR26	10	7	-0.116408	0.0731489	0.124773	FALSE	72	66	0.0115308
Q9R087	Q9R087	>sp|Q9R087|GPC6_MOUSE Glypican-6 OS=Mus musculus (Mouse) OX=10090 GN=Gpc6 PE=1 SV=1	GPC6	5	1	-1.02481	1.22898e-07	1.34418e-06	TRUE	27	33	-0.59282
Q6P8I4	Q6P8I4	>sp|Q6P8I4|PCNP_MOUSE PEST proteolytic signal-containing nuclear protein OS=Mus musculus (Mouse) OX=10090 GN=Pcnp PE=1 SV=1	PCNP	5	2	-0.792031	3.07782e-05	0.000147333	TRUE	38	39	-0.218631
Q9CQD1	Q9CQD1	>sp|Q9CQD1|RAB5A_MOUSE Ras-related protein Rab-5A OS=Mus musculus (Mouse) OX=10090 GN=Rab5a PE=1 SV=1	RAB5A	7	4	-0.137904	0.0317938	0.0615415	FALSE	51	43	0.199119
Q80VE5	Q80VE5	>tr|Q80VE5|Q80VE5_MOUSE Rab-GAP TBC domain-containing protein OS=Mus musculus (Mouse) OX=10090 GN=Tbc1d22b PE=1 SV=1	TBC1D22B	7	1	0.258726	0.56217	0.653709	FALSE	19	38	-1.54221
Q6PAK3	Q6PAK3	>sp|Q6PAK3|ANM8_MOUSE Protein arginine N-methyltransferase 8 OS=Mus musculus (Mouse) OX=10090 GN=Prmt8 PE=1 SV=2	PRMT8	8	6	-0.28349	0.0240296	0.0485796	FALSE	72	63	0.107183
Q8BZ32	Q8BZ32	>sp|Q8BZ32|ASXL2_MOUSE Putative Polycomb group protein ASXL2 OS=Mus musculus (Mouse) OX=10090 GN=Asxl2 PE=1 SV=1	ASXL2	1	1	-0.734225	0.000178971	0.000671482	TRUE	9	8	0.0794524
Q9CPS6	Q9CPS6	>sp|Q9CPS6|HINT3_MOUSE Histidine triad nucleotide-binding protein 3 OS=Mus musculus (Mouse) OX=10090 GN=Hint3 PE=1 SV=1	HINT3	2	2	-0.27448	0.00462584	0.0114935	FALSE	19	15	0.312473
Q3V3Q7;Q8K212	Q3V3Q7;Q8K212	>sp|Q3V3Q7|PACS2_MOUSE Phosphofurin acidic cluster sorting protein 2 OS=Mus musculus (Mouse) OX=10090 GN=Pacs2 PE=1 SV=2;>sp|Q8K212|PACS1_MOUSE Phosphofurin acidic cluster sorting protein 1 OS=Mus musculus (Mouse) OX=10090 GN=Pacs1 PE=1 SV=2	PACS2;PACS1	2	2	-0.229831	0.0117308	0.0263092	FALSE	20	16	0.286542
Q8BMF3;Q99KE1	Q8BMF3;Q99KE1	>sp|Q8BMF3|MAON_MOUSE NADP-dependent malic enzyme, mitochondrial OS=Mus musculus (Mouse) OX=10090 GN=Me3 PE=1 SV=2;>sp|Q99KE1|MAOM_MOUSE NAD-dependent malic enzyme, mitochondrial OS=Mus musculus (Mouse) OX=10090 GN=Me2 PE=1 SV=1	ME3;ME2	1	1	-0.347651	0.0791944	0.133094	FALSE	10	8	0.266117
Q9JKW0	Q9JKW0	>sp|Q9JKW0|AR6P1_MOUSE ADP-ribosylation factor-like protein 6-interacting protein 1 OS=Mus musculus (Mouse) OX=10090 GN=Arl6ip1 PE=1 SV=1	ARL6IP1	1	0					5	7	-0.787815
Q9CQQ0	Q9CQQ0	>sp|Q9CQQ0|SMIM8_MOUSE Small integral membrane protein 8 OS=Mus musculus (Mouse) OX=10090 GN=Smim8 PE=1 SV=1	SMIM8	1	1	-0.266148	0.0330548	0.0636185	FALSE	10	8	0.266117
Q8JZM0	Q8JZM0	>sp|Q8JZM0|TFB1M_MOUSE Dimethyladenosine transferase 1, mitochondrial OS=Mus musculus (Mouse) OX=10090 GN=Tfb1m PE=1 SV=1	TFB1M	2	1	0.134044	0.37576	0.480143	FALSE	11	10	0.00240616
Q9CQG2	Q9CQG2	>sp|Q9CQG2|MET16_MOUSE RNA N6-adenosine-methyltransferase METTL16 OS=Mus musculus (Mouse) OX=10090 GN=Mettl16 PE=1 SV=1	METTL16	3	1	-0.0517254	0.757749	0.815435	FALSE	18	11	0.802931
Q7TMF3	Q7TMF3	>sp|Q7TMF3|NDUAC_MOUSE NADH dehydrogenase [ubiquinone] 1 alpha subcomplex subunit 12 OS=Mus musculus (Mouse) OX=10090 GN=Ndufa12 PE=1 SV=2	NDUFA12	7	6	-0.187685	0.000993957	0.00299151	FALSE	65	53	0.261887
O89053	O89053	>sp|O89053|COR1A_MOUSE Coronin-1A OS=Mus musculus (Mouse) OX=10090 GN=Coro1a PE=1 SV=5	CORO1A	13	10	-0.500409	1.79048e-07	1.85702e-06	TRUE	111	96	0.144279
Q8VHH5	Q8VHH5	>sp|Q8VHH5|AGAP3_MOUSE Arf-GAP with GTPase, ANK repeat and PH domain-containing protein 3 OS=Mus musculus (Mouse) OX=10090 GN=Agap3 PE=1 SV=1	AGAP3	14	10	0.618059	6.92133e-08	8.30866e-07	TRUE	131	98	0.438705
Q62418	Q62418	>sp|Q62418|DBNL_MOUSE Drebrin-like protein OS=Mus musculus (Mouse) OX=10090 GN=Dbnl PE=1 SV=2	DBNL	19	12	-0.841902	1.14291e-11	8.43174e-10	TRUE	142	141	-0.147648
P47857	P47857	>sp|P47857|PFKAM_MOUSE ATP-dependent 6-phosphofructokinase, muscle type OS=Mus musculus (Mouse) OX=10090 GN=Pfkm PE=1 SV=3	PFKM	24	19	-0.537624	7.08285e-11	3.33448e-09	TRUE	201	180	0.0739621
P62137	P62137	>sp|P62137|PP1A_MOUSE Serine/threonine-protein phosphatase PP1-alpha catalytic subunit OS=Mus musculus (Mouse) OX=10090 GN=Ppp1ca PE=1 SV=1	PPP1CA	5	5	-0.109499	0.0252951	0.0507589	FALSE	50	40	0.299806
Q5GH67	Q5GH67	>sp|Q5GH67|XKR4_MOUSE XK-related protein 4 OS=Mus musculus (Mouse) OX=10090 GN=Xkr4 PE=1 SV=1	XKR4	1	1	-0.110886	0.524758	0.620992	FALSE	10	8	0.266117
O88990;Q7TPR4;Q9JI91	O88990;Q7TPR4;Q9JI91	>sp|O88990|ACTN3_MOUSE Alpha-actinin-3 OS=Mus musculus (Mouse) OX=10090 GN=Actn3 PE=2 SV=1;>sp|Q7TPR4|ACTN1_MOUSE Alpha-actinin-1 OS=Mus musculus (Mouse) OX=10090 GN=Actn1 PE=1 SV=1;>sp|Q9JI91|ACTN2_MOUSE Alpha-actinin-2 OS=Mus musculus (Mouse) OX=10090 GN=Actn2 PE=1 SV=2	ACTN3;ACTN1;ACTN2	1	1	-0.91385	6.99447e-08	8.3594e-07	TRUE	9	8	0.0684476
Q922H2	Q922H2	>sp|Q922H2|PDK3_MOUSE [Pyruvate dehydrogenase (acetyl-transferring)] kinase isozyme 3, mitochondrial OS=Mus musculus (Mouse) OX=10090 GN=Pdk3 PE=1 SV=1	PDK3	15	12	0.272278	0.000254725	0.000915115	TRUE	135	110	0.264377
Q3UTJ2	Q3UTJ2	>sp|Q3UTJ2|SRBS2_MOUSE Sorbin and SH3 domain-containing protein 2 OS=Mus musculus (Mouse) OX=10090 GN=Sorbs2 PE=1 SV=2	SORBS2	22	0					24	142	-3.75198
P62911	P62911	>sp|P62911|RL32_MOUSE 60S ribosomal protein L32 OS=Mus musculus (Mouse) OX=10090 GN=Rpl32 PE=1 SV=2	RPL32	4	2	1.32174	6.1441e-06	3.70838e-05	TRUE	39	24	0.806282
Q9QYF9	Q9QYF9	>sp|Q9QYF9|NDRG3_MOUSE Protein NDRG3 OS=Mus musculus (Mouse) OX=10090 GN=Ndrg3 PE=1 SV=1	NDRG3	7	7	-0.601892	9.1882e-07	7.24625e-06	TRUE	70	56	0.302425
P57759	P57759	>sp|P57759|ERP29_MOUSE Endoplasmic reticulum resident protein 29 OS=Mus musculus (Mouse) OX=10090 GN=Erp29 PE=1 SV=2	ERP29	9	7	-0.234971	5.67645e-05	0.000248643	FALSE	80	69	0.146656
Q99PL6	Q99PL6	>sp|Q99PL6|UBXN6_MOUSE UBX domain-containing protein 6 OS=Mus musculus (Mouse) OX=10090 GN=Ubxn6 PE=1 SV=1	UBXN6	11	6	0.0799029	0.283718	0.384879	FALSE	92	65	0.555269
P50446;Q8BGZ7;Q922U2	P50446;Q8BGZ7;Q922U2	>sp|P50446|K2C6A_MOUSE Keratin, type II cytoskeletal 6A OS=Mus musculus (Mouse) OX=10090 GN=Krt6a PE=1 SV=3;>sp|Q8BGZ7|K2C75_MOUSE Keratin, type II cytoskeletal 75 OS=Mus musculus (Mouse) OX=10090 GN=Krt75 PE=1 SV=1;>sp|Q922U2|K2C5_MOUSE Keratin, type II cytoskeletal 5 OS=Mus musculus (Mouse) OX=10090 GN=Krt5 PE=1 SV=1	KRT6A;KRT75;KRT5	1	1	-0.213894	0.745094	0.804695	FALSE	10	8	0.266117
Q9DAK9	Q9DAK9	>sp|Q9DAK9|PHP14_MOUSE 14 kDa phosphohistidine phosphatase OS=Mus musculus (Mouse) OX=10090 GN=Phpt1 PE=1 SV=1	PHPT1	5	4	-0.0125537	0.931431	0.948982	FALSE	46	37	0.286713
Q8BVG4	Q8BVG4	>sp|Q8BVG4|DPP9_MOUSE Dipeptidyl peptidase 9 OS=Mus musculus (Mouse) OX=10090 GN=Dpp9 PE=1 SV=2	DPP9	6	3	-0.140962	0.153385	0.233018	FALSE	42	38	0.0357999
Q91W18	Q91W18	>sp|Q91W18|TDRD3_MOUSE Tudor domain-containing protein 3 OS=Mus musculus (Mouse) OX=10090 GN=Tdrd3 PE=1 SV=4	TDRD3	2	1	-0.315291	0.0561577	0.0992001	FALSE	13	14	-0.304493
Q91V12	Q91V12	>sp|Q91V12|BACH_MOUSE Cytosolic acyl coenzyme A thioester hydrolase OS=Mus musculus (Mouse) OX=10090 GN=Acot7 PE=1 SV=2	ACOT7	16	13	-0.166966	0.0366122	0.069544	FALSE	142	117	0.244839
P12658;Q08331	P12658;Q08331	>sp|P12658|CALB1_MOUSE Calbindin OS=Mus musculus (Mouse) OX=10090 GN=Calb1 PE=1 SV=2;>sp|Q08331|CALB2_MOUSE Calretinin OS=Mus musculus (Mouse) OX=10090 GN=Calb2 PE=1 SV=3	CALB1;CALB2	1	1	-1.537	7.54761e-08	8.96113e-07	TRUE	10	8	0.266117
Q8VEH3	Q8VEH3	>sp|Q8VEH3|ARL8A_MOUSE ADP-ribosylation factor-like protein 8A OS=Mus musculus (Mouse) OX=10090 GN=Arl8a PE=1 SV=1	ARL8A	7	6	0.020745	0.769575	0.824849	FALSE	62	52	0.204909
P17426;P17427	P17426;P17427	>sp|P17426|AP2A1_MOUSE AP-2 complex subunit alpha-1 OS=Mus musculus (Mouse) OX=10090 GN=Ap2a1 PE=1 SV=1;>sp|P17427|AP2A2_MOUSE AP-2 complex subunit alpha-2 OS=Mus musculus (Mouse) OX=10090 GN=Ap2a2 PE=1 SV=2	AP2A1;AP2A2	7	6	-0.0735385	0.401484	0.506556	FALSE	60	52	0.134344
Q99L47	Q99L47	>sp|Q99L47|F10A1_MOUSE Hsc70-interacting protein OS=Mus musculus (Mouse) OX=10090 GN=St13 PE=1 SV=1	ST13	10	9	-0.137033	0.0166061	0.0355639	FALSE	94	76	0.280952
Q8BHL5;Q8BPU7	Q8BHL5;Q8BPU7	>sp|Q8BHL5|ELMO2_MOUSE Engulfment and cell motility protein 2 OS=Mus musculus (Mouse) OX=10090 GN=Elmo2 PE=1 SV=1;>sp|Q8BPU7|ELMO1_MOUSE Engulfment and cell motility protein 1 OS=Mus musculus (Mouse) OX=10090 GN=Elmo1 PE=1 SV=2	ELMO2;ELMO1	1	1	-0.0929649	0.543976	0.638017	FALSE	10	8	0.266117
P38585	P38585	>sp|P38585|TTL_MOUSE Tubulin--tyrosine ligase OS=Mus musculus (Mouse) OX=10090 GN=Ttl PE=1 SV=2	TTL	6	5	0.11345	0.1325	0.206018	FALSE	55	40	0.48943
P62814	P62814	>sp|P62814|VATB2_MOUSE V-type proton ATPase subunit B, brain isoform OS=Mus musculus (Mouse) OX=10090 GN=Atp6v1b2 PE=1 SV=1	ATP6V1B2	22	17	-0.027246	0.591128	0.678542	FALSE	191	159	0.224943
Q9D3B1	Q9D3B1	>sp|Q9D3B1|HACD2_MOUSE Very-long-chain (3R)-3-hydroxyacyl-CoA dehydratase 2 OS=Mus musculus (Mouse) OX=10090 GN=Hacd2 PE=1 SV=1	HACD2	2	1	-0.369941	0.0258567	0.0517516	FALSE	17	15	0.0641889
O08808	O08808	>sp|O08808|DIAP1_MOUSE Protein diaphanous homolog 1 OS=Mus musculus (Mouse) OX=10090 GN=Diaph1 PE=1 SV=1	DIAPH1	6	2	0.152062	0.325574	0.428721	FALSE	32	27	0.187402
O35643	O35643	>sp|O35643|AP1B1_MOUSE AP-1 complex subunit beta-1 OS=Mus musculus (Mouse) OX=10090 GN=Ap1b1 PE=1 SV=2	AP1B1	19	13	-0.392281	1.57642e-06	1.1456e-05	TRUE	156	145	-0.011847
Q03137;Q61772	Q03137;Q61772	>sp|Q03137|EPHA4_MOUSE Ephrin type-A receptor 4 OS=Mus musculus (Mouse) OX=10090 GN=Epha4 PE=1 SV=2;>sp|Q61772|EPHA7_MOUSE Ephrin type-A receptor 7 OS=Mus musculus (Mouse) OX=10090 GN=Epha7 PE=1 SV=2	EPHA4;EPHA7	1	0					7	8	-0.440527
Q9D0E3;Q9D7V2	Q9D0E3;Q9D7V2	>sp|Q9D0E3|LYSM1_MOUSE LysM and putative peptidoglycan-binding domain-containing protein 1 OS=Mus musculus (Mouse) OX=10090 GN=Lysmd1 PE=1 SV=1;>sp|Q9D7V2|LYSM2_MOUSE LysM and putative peptidoglycan-binding domain-containing protein 2 OS=Mus musculus (Mouse) OX=10090 GN=Lysmd2 PE=1 SV=2	LYSMD1;LYSMD2	1	1	-0.22238	0.0691738	0.119118	FALSE	10	8	0.266117
P28663;Q9DB05	P28663;Q9DB05	>sp|P28663|SNAB_MOUSE Beta-soluble NSF attachment protein OS=Mus musculus (Mouse) OX=10090 GN=Napb PE=1 SV=2;>sp|Q9DB05|SNAA_MOUSE Alpha-soluble NSF attachment protein OS=Mus musculus (Mouse) OX=10090 GN=Napa PE=1 SV=1	NAPB;NAPA	4	3	-0.223943	0.0503884	0.0905721	FALSE	33	28	0.180113
O35841	O35841	>sp|O35841|API5_MOUSE Apoptosis inhibitor 5 OS=Mus musculus (Mouse) OX=10090 GN=Api5 PE=1 SV=2	API5	15	9	0.104	0.287227	0.387793	FALSE	117	98	0.21153
A2AJI0	A2AJI0	>sp|A2AJI0|MA7D1_MOUSE MAP7 domain-containing protein 1 OS=Mus musculus (Mouse) OX=10090 GN=Map7d1 PE=1 SV=1	MAP7D1	6	2	-1.12594	6.596e-10	1.92261e-08	TRUE	28	38	-0.773268
Q9WUR9	Q9WUR9	>sp|Q9WUR9|KAD4_MOUSE Adenylate kinase 4, mitochondrial OS=Mus musculus (Mouse) OX=10090 GN=Ak4 PE=1 SV=1	AK4	9	7	0.00153964	0.97893	0.984589	FALSE	84	63	0.437785
Q8CC27;Q8R0S4;Q8R3Z5	Q8CC27;Q8R0S4;Q8R3Z5	>sp|Q8CC27|CACB2_MOUSE Voltage-dependent L-type calcium channel subunit beta-2 OS=Mus musculus (Mouse) OX=10090 GN=Cacnb2 PE=1 SV=1;>sp|Q8R0S4|CACB4_MOUSE Voltage-dependent L-type calcium channel subunit beta-4 OS=Mus musculus (Mouse) OX=10090 GN=Cacnb4 PE=1 SV=2;>sp|Q8R3Z5|CACB1_MOUSE Voltage-dependent L-type calcium channel subunit beta-1 OS=Mus musculus (Mouse) OX=10090 GN=Cacnb1 PE=1 SV=1	CACNB2;CACNB4;CACNB1	2	2	-0.302804	0.00996245	0.0228739	FALSE	20	16	0.286542
Q9DB05	Q9DB05	>sp|Q9DB05|SNAA_MOUSE Alpha-soluble NSF attachment protein OS=Mus musculus (Mouse) OX=10090 GN=Napa PE=1 SV=1	NAPA	15	12	0.00180442	0.980986	0.985639	FALSE	134	110	0.24714
Q6PDC0	Q6PDC0	>sp|Q6PDC0|RUN3B_MOUSE RUN domain-containing protein 3B OS=Mus musculus (Mouse) OX=10090 GN=Rundc3b PE=1 SV=1	RUNDC3B	2	1	0.108847	0.513614	0.611683	FALSE	18	8	1.41014
Q9CR57	Q9CR57	>sp|Q9CR57|RL14_MOUSE 60S ribosomal protein L14 OS=Mus musculus (Mouse) OX=10090 GN=Rpl14 PE=1 SV=3	RPL14	4	4	0.27747	0.0569529	0.100438	FALSE	40	30	0.433267
O08539	O08539	>sp|O08539|BIN1_MOUSE Myc box-dependent-interacting protein 1 OS=Mus musculus (Mouse) OX=10090 GN=Bin1 PE=1 SV=1	BIN1	19	14	-0.470453	1.63389e-06	1.17945e-05	TRUE	153	132	0.148803
Q8BH44	Q8BH44	>sp|Q8BH44|COR2B_MOUSE Coronin-2B OS=Mus musculus (Mouse) OX=10090 GN=Coro2b PE=1 SV=2	CORO2B	10	8	-0.804838	2.90001e-08	4.11012e-07	TRUE	86	77	0.0621391
P35235	P35235	>sp|P35235|PTN11_MOUSE Tyrosine-protein phosphatase non-receptor type 11 OS=Mus musculus (Mouse) OX=10090 GN=Ptpn11 PE=1 SV=2	PTPN11	22	15	-0.289188	0.000172149	0.000648132	TRUE	168	153	0.0320114
Q9CRA5	Q9CRA5	>sp|Q9CRA5|GOLP3_MOUSE Golgi phosphoprotein 3 OS=Mus musculus (Mouse) OX=10090 GN=Golph3 PE=1 SV=1	GOLPH3	1	1	-0.644386	0.00380474	0.00967082	TRUE	10	8	0.266117
D3YXK2;Q80YR5	D3YXK2;Q80YR5	>sp|D3YXK2|SAFB1_MOUSE Scaffold attachment factor B1 OS=Mus musculus (Mouse) OX=10090 GN=Safb PE=1 SV=2;>sp|Q80YR5|SAFB2_MOUSE Scaffold attachment factor B2 OS=Mus musculus (Mouse) OX=10090 GN=Safb2 PE=1 SV=2	SAFB;SAFB2	2	2	-0.167423	0.42134	0.525729	FALSE	20	14	0.551761
Q80U56	Q80U56	>sp|Q80U56|AVL9_MOUSE Late secretory pathway protein AVL9 homolog OS=Mus musculus (Mouse) OX=10090 GN=Avl9 PE=1 SV=2	AVL9	12	9	-0.18633	0.00380188	0.0096681	FALSE	99	88	0.088444
P27601	P27601	>sp|P27601|GNA13_MOUSE Guanine nucleotide-binding protein subunit alpha-13 OS=Mus musculus (Mouse) OX=10090 GN=Gna13 PE=1 SV=1	GNA13	14	7	-0.656535	1.81806e-07	1.87843e-06	TRUE	96	103	-0.307188
Q9CQK7	Q9CQK7	>sp|Q9CQK7|RWDD1_MOUSE RWD domain-containing protein 1 OS=Mus musculus (Mouse) OX=10090 GN=Rwdd1 PE=1 SV=1	RWDD1	4	4	-0.325026	4.9866e-05	0.000223304	TRUE	36	30	0.203655
A2A690	A2A690	>sp|A2A690|TANC2_MOUSE Protein TANC2 OS=Mus musculus (Mouse) OX=10090 GN=Tanc2 PE=1 SV=1	TANC2	7	1	-0.182638	0.435554	0.539238	FALSE	31	33	-0.265267
Q8BFP9	Q8BFP9	>sp|Q8BFP9|PDK1_MOUSE [Pyruvate dehydrogenase (acetyl-transferring)] kinase isozyme 1, mitochondrial OS=Mus musculus (Mouse) OX=10090 GN=Pdk1 PE=1 SV=2	PDK1	10	9	0.303935	6.73575e-05	0.000286468	TRUE	90	69	0.393113
Q9JHS3	Q9JHS3	>sp|Q9JHS3|LTOR2_MOUSE Ragulator complex protein LAMTOR2 OS=Mus musculus (Mouse) OX=10090 GN=Lamtor2 PE=1 SV=1	LAMTOR2	3	3	-0.494639	6.27995e-06	3.77355e-05	TRUE	29	24	0.227177
P04627;P28028;Q99N57	P04627;P28028;Q99N57	>sp|P04627|ARAF_MOUSE Serine/threonine-protein kinase A-Raf OS=Mus musculus (Mouse) OX=10090 GN=Araf PE=1 SV=2;>sp|P28028|BRAF_MOUSE Serine/threonine-protein kinase B-raf OS=Mus musculus (Mouse) OX=10090 GN=Braf PE=1 SV=3;>sp|Q99N57|RAF1_MOUSE RAF proto-oncogene serine/threonine-protein kinase OS=Mus musculus (Mouse) OX=10090 GN=Raf1 PE=1 SV=2	ARAF;BRAF;RAF1	3	2	-0.351033	0.0130775	0.0289339	FALSE	26	23	0.0959063
P12023;Q06335	P12023;Q06335	>sp|P12023|A4_MOUSE Amyloid-beta A4 protein OS=Mus musculus (Mouse) OX=10090 GN=App PE=1 SV=3;>sp|Q06335|APLP2_MOUSE Amyloid-like protein 2 OS=Mus musculus (Mouse) OX=10090 GN=Aplp2 PE=1 SV=4	APP;APLP2	1	1	-0.824166	0.0316612	0.0613726	FALSE	10	8	0.266117
P33175	P33175	>sp|P33175|KIF5A_MOUSE Kinesin heavy chain isoform 5A OS=Mus musculus (Mouse) OX=10090 GN=Kif5a PE=1 SV=3	KIF5A	5	0					18	21	-0.480969
Q91ZP9	Q91ZP9	>sp|Q91ZP9|NECA2_MOUSE N-terminal EF-hand calcium-binding protein 2 OS=Mus musculus (Mouse) OX=10090 GN=Necab2 PE=1 SV=1	NECAB2	14	12	-0.41277	0.0022829	0.00619219	TRUE	122	101	0.232128
Q61316	Q61316	>sp|Q61316|HSP74_MOUSE Heat shock 70 kDa protein 4 OS=Mus musculus (Mouse) OX=10090 GN=Hspa4 PE=1 SV=1	HSPA4	40	23	-0.291253	1.06751e-06	8.20948e-06	TRUE	295	269	0.0357515
Q9CY45	Q9CY45	>sp|Q9CY45|EFMT1_MOUSE EEF1A lysine methyltransferase 1 OS=Mus musculus (Mouse) OX=10090 GN=Eef1akmt1 PE=1 SV=1	EEF1AKMT1	2	2	-0.651776	1.72205e-06	1.2365e-05	TRUE	17	15	0.086841
Q56A07	Q56A07	>sp|Q56A07|SCN2B_MOUSE Sodium channel subunit beta-2 OS=Mus musculus (Mouse) OX=10090 GN=Scn2b PE=1 SV=1	SCN2B	4	3	-0.656457	2.2445e-08	3.32924e-07	TRUE	29	28	-0.0723653
Q9WUU7	Q9WUU7	>sp|Q9WUU7|CATZ_MOUSE Cathepsin Z OS=Mus musculus (Mouse) OX=10090 GN=Ctsz PE=1 SV=1	CTSZ	1	0					0	8	-4.82395
P38647	P38647	>sp|P38647|GRP75_MOUSE Stress-70 protein, mitochondrial OS=Mus musculus (Mouse) OX=10090 GN=Hspa9 PE=1 SV=3	HSPA9	40	34	0.221289	0.000148264	0.000570506	FALSE	362	294	0.275706
Q9ERS2	Q9ERS2	>sp|Q9ERS2|NDUAD_MOUSE NADH dehydrogenase [ubiquinone] 1 alpha subcomplex subunit 13 OS=Mus musculus (Mouse) OX=10090 GN=Ndufa13 PE=1 SV=3	NDUFA13	8	6	-0.213019	0.00106425	0.00318686	FALSE	73	58	0.314778
P14115	P14115	>sp|P14115|RL27A_MOUSE 60S ribosomal protein L27a OS=Mus musculus (Mouse) OX=10090 GN=Rpl27a PE=1 SV=5	RPL27A	3	3	0.867033	5.132e-07	4.46699e-06	TRUE	30	24	0.293811
Q8CAK3	Q8CAK3	>sp|Q8CAK3|SHFL_MOUSE Shiftless antiviral inhibitor of ribosomal frameshifting protein homolog OS=Mus musculus (Mouse) OX=10090 GN=Shfl PE=2 SV=1	SHFL	1	0					7	8	-0.428177
Q3TCH7	Q3TCH7	>sp|Q3TCH7|CUL4A_MOUSE Cullin-4A OS=Mus musculus (Mouse) OX=10090 GN=Cul4a PE=1 SV=1	CUL4A	11	7	0.158688	0.0383106	0.0720937	FALSE	86	73	0.169376
O88643;Q8CIN4	O88643;Q8CIN4	>sp|O88643|PAK1_MOUSE Serine/threonine-protein kinase PAK 1 OS=Mus musculus (Mouse) OX=10090 GN=Pak1 PE=1 SV=1;>sp|Q8CIN4|PAK2_MOUSE Serine/threonine-protein kinase PAK 2 OS=Mus musculus (Mouse) OX=10090 GN=Pak2 PE=1 SV=1	PAK1;PAK2	1	1	-0.322071	0.0269337	0.0535116	FALSE	10	8	0.266117
Q923S9	Q923S9	>sp|Q923S9|RAB30_MOUSE Ras-related protein Rab-30 OS=Mus musculus (Mouse) OX=10090 GN=Rab30 PE=1 SV=1	RAB30	6	4	0.117404	0.124904	0.195612	FALSE	50	45	0.0564768
Q91WK1	Q91WK1	>sp|Q91WK1|SPRY4_MOUSE SPRY domain-containing protein 4 OS=Mus musculus (Mouse) OX=10090 GN=Spryd4 PE=1 SV=1	SPRYD4	9	6	0.347091	7.7862e-06	4.51333e-05	TRUE	74	58	0.347319
P21278	P21278	>sp|P21278|GNA11_MOUSE Guanine nucleotide-binding protein subunit alpha-11 OS=Mus musculus (Mouse) OX=10090 GN=Gna11 PE=1 SV=1	GNA11	9	7	0.090851	0.103503	0.167099	FALSE	83	69	0.221203
Q61033	Q61033	>sp|Q61033|LAP2A_MOUSE Lamina-associated polypeptide 2, isoforms alpha/zeta OS=Mus musculus (Mouse) OX=10090 GN=Tmpo PE=1 SV=4	TMPO	5	4	-0.47377	0.00232266	0.0062843	TRUE	42	37	0.0983537
P46737	P46737	>sp|P46737|BRCC3_MOUSE Lys-63-specific deubiquitinase BRCC36 OS=Mus musculus (Mouse) OX=10090 GN=Brcc3 PE=1 SV=1	BRCC3	4	3	0.092582	0.33447	0.437785	FALSE	37	29	0.325348
Q06180	Q06180	>sp|Q06180|PTN2_MOUSE Tyrosine-protein phosphatase non-receptor type 2 OS=Mus musculus (Mouse) OX=10090 GN=Ptpn2 PE=1 SV=2	PTPN2	2	1	-0.296336	0.0304484	0.0593405	FALSE	11	11	-0.179421
A0A0U1RNF2	A0A0U1RNF2	>tr|A0A0U1RNF2|A0A0U1RNF2_MOUSE Leucine carboxyl methyltransferase 1 OS=Mus musculus (Mouse) OX=10090 GN=Lcmt1 PE=1 SV=1	LCMT1	7	5	-0.0860868	0.103519	0.167099	FALSE	60	49	0.248121
O08553;P97427	O08553;P97427	>sp|O08553|DPYL2_MOUSE Dihydropyrimidinase-related protein 2 OS=Mus musculus (Mouse) OX=10090 GN=Dpysl2 PE=1 SV=2;>sp|P97427|DPYL1_MOUSE Dihydropyrimidinase-related protein 1 OS=Mus musculus (Mouse) OX=10090 GN=Crmp1 PE=1 SV=1	DPYSL2;CRMP1	1	1	-0.418385	0.000579662	0.00186914	TRUE	10	8	0.266117
Q99MB7	Q99MB7	>sp|Q99MB7|RN141_MOUSE RING finger protein 141 OS=Mus musculus (Mouse) OX=10090 GN=Rnf141 PE=1 SV=2	RNF141	2	1	-0.152563	0.228199	0.323142	FALSE	8	11	-0.728396
P97427	P97427	>sp|P97427|DPYL1_MOUSE Dihydropyrimidinase-related protein 1 OS=Mus musculus (Mouse) OX=10090 GN=Crmp1 PE=1 SV=1	CRMP1	25	20	-0.202193	0.00150513	0.00428882	FALSE	226	185	0.260364
Q9D8U8	Q9D8U8	>sp|Q9D8U8|SNX5_MOUSE Sorting nexin-5 OS=Mus musculus (Mouse) OX=10090 GN=Snx5 PE=1 SV=1	SNX5	14	10	-0.299922	6.52522e-05	0.00027949	TRUE	111	95	0.165525
P35276;P35283;P55258;P56371;P61027;P61028;P62821;P62823;P63011;Q504M8;Q6PHN9;Q8BHC1;Q91V41;Q91ZR1;Q923S9;Q9CZT8;Q9D1G1	P35276;P35283;P55258;P56371;P61027;P61028;P62821;P62823;P63011;Q504M8;Q6PHN9;Q8BHC1;Q91V41;Q91ZR1;Q923S9;Q9CZT8;Q9D1G1	>sp|P35276|RAB3D_MOUSE Ras-related protein Rab-3D OS=Mus musculus (Mouse) OX=10090 GN=Rab3d PE=1 SV=1;>sp|P35283|RAB12_MOUSE Ras-related protein Rab-12 OS=Mus musculus (Mouse) OX=10090 GN=Rab12 PE=1 SV=3;>sp|P55258|RAB8A_MOUSE Ras-related protein Rab-8A OS=Mus musculus (Mouse) OX=10090 GN=Rab8a PE=1 SV=2;>sp|P56371|RAB4A_MOUSE Ras-related protein Rab-4A OS=Mus musculus (Mouse) OX=10090 GN=Rab4a P…	RAB3D;RAB12;RAB8A;RAB4A;RAB10;RAB8B;RAB1A;RAB3C;RAB3A;RAB26;RAB35;RAB39B;RAB14;RAB4B;RAB30;RAB3B;RAB1B	1	1	-0.294407	0.0141614	0.0310405	FALSE	10	8	0.266117
Q9R0P5	Q9R0P5	>sp|Q9R0P5|DEST_MOUSE Destrin OS=Mus musculus (Mouse) OX=10090 GN=Dstn PE=1 SV=3	DSTN	7	5	-0.150289	0.0102466	0.0234469	FALSE	60	51	0.179708
Q9CYZ2	Q9CYZ2	>sp|Q9CYZ2|TPD54_MOUSE Tumor protein D54 OS=Mus musculus (Mouse) OX=10090 GN=Tpd52l2 PE=1 SV=1	TPD52L2	7	5	-0.333114	0.000722065	0.0022715	TRUE	61	54	0.0834573
Q9QYK7	Q9QYK7	>sp|Q9QYK7|RNF11_MOUSE RING finger protein 11 OS=Mus musculus (Mouse) OX=10090 GN=Rnf11 PE=1 SV=1	RNF11	3	2	0.197738	0.0537991	0.0959066	FALSE	25	18	0.516754
Q8BHJ7	Q8BHJ7	>sp|Q8BHJ7|GBRA5_MOUSE Gamma-aminobutyric acid receptor subunit alpha-5 OS=Mus musculus (Mouse) OX=10090 GN=Gabra5 PE=1 SV=1	GABRA5	5	5	-0.182381	0.112547	0.179321	FALSE	46	40	0.118497
Q8VEH3;Q9CQW2	Q8VEH3;Q9CQW2	>sp|Q8VEH3|ARL8A_MOUSE ADP-ribosylation factor-like protein 8A OS=Mus musculus (Mouse) OX=10090 GN=Arl8a PE=1 SV=1;>sp|Q9CQW2|ARL8B_MOUSE ADP-ribosylation factor-like protein 8B OS=Mus musculus (Mouse) OX=10090 GN=Arl8b PE=1 SV=1	ARL8A;ARL8B	6	4	-0.0432297	0.804159	0.853838	FALSE	48	42	0.118884
Q8BGT5	Q8BGT5	>sp|Q8BGT5|ALAT2_MOUSE Alanine aminotransferase 2 OS=Mus musculus (Mouse) OX=10090 GN=Gpt2 PE=1 SV=1	GPT2	9	1	-1.47706	7.60208e-09	1.33629e-07	TRUE	34	61	-1.3504
P19096	P19096	>sp|P19096|FAS_MOUSE Fatty acid synthase OS=Mus musculus (Mouse) OX=10090 GN=Fasn PE=1 SV=2	FASN	64	52	-0.173468	0.490176	0.588689	FALSE	572	470	0.254928
Q61749	Q61749	>sp|Q61749|EI2BD_MOUSE Translation initiation factor eIF-2B subunit delta OS=Mus musculus (Mouse) OX=10090 GN=Eif2b4 PE=1 SV=2	EIF2B4	7	5	0.366424	0.000437086	0.00146254	TRUE	62	50	0.285116
Q9Z268	Q9Z268	>sp|Q9Z268|RASL1_MOUSE RasGAP-activating-like protein 1 OS=Mus musculus (Mouse) OX=10090 GN=Rasal1 PE=1 SV=2	RASAL1	16	1	-0.97182	1.65709e-05	8.6514e-05	TRUE	35	97	-2.25111
Q9JKS5	Q9JKS5	>sp|Q9JKS5|HABP4_MOUSE Intracellular hyaluronan-binding protein 4 OS=Mus musculus (Mouse) OX=10090 GN=Habp4 PE=1 SV=2	HABP4	6	0					27	40	-0.922701
Q9D7P6	Q9D7P6	>sp|Q9D7P6|ISCU_MOUSE Iron-sulfur cluster assembly enzyme ISCU, mitochondrial OS=Mus musculus (Mouse) OX=10090 GN=Iscu PE=1 SV=1	ISCU	1	1	-0.248903	0.054089	0.0962649	FALSE	10	8	0.266117
P00375	P00375	>sp|P00375|DYR_MOUSE Dihydrofolate reductase OS=Mus musculus (Mouse) OX=10090 GN=Dhfr PE=1 SV=3	DHFR	4	2	-0.451647	0.000796886	0.0024724	TRUE	25	21	0.198007
Q8CG72	Q8CG72	>sp|Q8CG72|ARHL2_MOUSE ADP-ribose glycohydrolase ARH3 OS=Mus musculus (Mouse) OX=10090 GN=Adprhl2 PE=1 SV=1	ADPRHL2	6	4	0.0870813	0.295511	0.397095	FALSE	53	38	0.522129
Q9WTN0	Q9WTN0	>sp|Q9WTN0|GGPPS_MOUSE Geranylgeranyl pyrophosphate synthase OS=Mus musculus (Mouse) OX=10090 GN=Ggps1 PE=1 SV=1	GGPS1	4	3	-0.442934	0.000528437	0.00172868	TRUE	30	26	0.131853
Q9EPK7	Q9EPK7	>sp|Q9EPK7|XPO7_MOUSE Exportin-7 OS=Mus musculus (Mouse) OX=10090 GN=Xpo7 PE=1 SV=3	XPO7	23	18	0.227394	0.00238146	0.00642732	FALSE	208	161	0.369311
Q8CCB4	Q8CCB4	>sp|Q8CCB4|VPS53_MOUSE Vacuolar protein sorting-associated protein 53 homolog OS=Mus musculus (Mouse) OX=10090 GN=Vps53 PE=1 SV=1	VPS53	11	9	-0.0600294	0.303527	0.405671	FALSE	98	78	0.308445
O55023	O55023	>sp|O55023|IMPA1_MOUSE Inositol monophosphatase 1 OS=Mus musculus (Mouse) OX=10090 GN=Impa1 PE=1 SV=1	IMPA1	8	8	-0.20786	0.00123014	0.00360193	FALSE	80	64	0.30325
O35887	O35887	>sp|O35887|CALU_MOUSE Calumenin OS=Mus musculus (Mouse) OX=10090 GN=Calu PE=1 SV=1	CALU	16	6	-0.659869	7.94891e-08	9.36821e-07	TRUE	115	104	0.0515287
Q9QZ88	Q9QZ88	>sp|Q9QZ88|VPS29_MOUSE Vacuolar protein sorting-associated protein 29 OS=Mus musculus (Mouse) OX=10090 GN=Vps29 PE=1 SV=1	VPS29	7	6	-0.210332	0.00291871	0.00765968	FALSE	62	54	0.118718
Q9ER35	Q9ER35	>sp|Q9ER35|FN3K_MOUSE Fructosamine-3-kinase OS=Mus musculus (Mouse) OX=10090 GN=Fn3k PE=1 SV=1	FN3K	2	1	0.162986	0.173806	0.258127	FALSE	20	12	0.858403
P99029	P99029	>sp|P99029|PRDX5_MOUSE Peroxiredoxin-5, mitochondrial OS=Mus musculus (Mouse) OX=10090 GN=Prdx5 PE=1 SV=2	PRDX5	11	10	0.121205	0.0679933	0.117346	FALSE	105	85	0.280578
P30875	P30875	>sp|P30875|SSR2_MOUSE Somatostatin receptor type 2 OS=Mus musculus (Mouse) OX=10090 GN=Sstr2 PE=2 SV=1	SSTR2	2	1	-0.0208341	0.897115	0.926025	FALSE	15	15	-0.162751
B1AWN6	B1AWN6	>sp|B1AWN6|SCN2A_MOUSE Sodium channel protein type 2 subunit alpha OS=Mus musculus (Mouse) OX=10090 GN=Scn2a PE=1 SV=1	SCN2A	4	1	-0.0707198	0.765823	0.822163	FALSE	27	16	0.861867
Q8BPN8	Q8BPN8	>sp|Q8BPN8|DMXL2_MOUSE DmX-like protein 2 OS=Mus musculus (Mouse) OX=10090 GN=Dmxl2 PE=1 SV=3	DMXL2	58	26	0.844347	1.0767e-06	8.24504e-06	TRUE	506	293	0.962185
P12960	P12960	>sp|P12960|CNTN1_MOUSE Contactin-1 OS=Mus musculus (Mouse) OX=10090 GN=Cntn1 PE=1 SV=1	CNTN1	39	28	-0.946465	2.52278e-11	1.46864e-09	TRUE	313	280	0.0768476
P05132;P68181	P05132;P68181	>sp|P05132|KAPCA_MOUSE cAMP-dependent protein kinase catalytic subunit alpha OS=Mus musculus (Mouse) OX=10090 GN=Prkaca PE=1 SV=3;>sp|P68181|KAPCB_MOUSE cAMP-dependent protein kinase catalytic subunit beta OS=Mus musculus (Mouse) OX=10090 GN=Prkacb PE=1 SV=2	PRKACA;PRKACB	11	8	-0.0185916	0.769697	0.824849	FALSE	96	80	0.211917
Q3UHX2	Q3UHX2	>sp|Q3UHX2|HAP28_MOUSE 28 kDa heat- and acid-stable phosphoprotein OS=Mus musculus (Mouse) OX=10090 GN=Pdap1 PE=1 SV=1	PDAP1	4	2	-0.574363	2.18782e-06	1.50454e-05	TRUE	28	29	-0.234484
G5E8K5;Q8C8R3	G5E8K5;Q8C8R3	>sp|G5E8K5|ANK3_MOUSE Ankyrin-3 OS=Mus musculus (Mouse) OX=10090 GN=Ank3 PE=1 SV=1;>sp|Q8C8R3|ANK2_MOUSE Ankyrin-2 OS=Mus musculus (Mouse) OX=10090 GN=Ank2 PE=1 SV=2	ANK3;ANK2	6	3	0.050592	0.797424	0.848516	FALSE	54	40	0.46462
Q6PB93	Q6PB93	>sp|Q6PB93|GALT2_MOUSE Polypeptide N-acetylgalactosaminyltransferase 2 OS=Mus musculus (Mouse) OX=10090 GN=Galnt2 PE=1 SV=1	GALNT2	11	7	0.166748	0.055559	0.0983638	FALSE	85	66	0.358712
P62806	P62806	>sp|P62806|H4_MOUSE Histone H4 OS=Mus musculus (Mouse) OX=10090 GN=H4c2 PE=1 SV=2	H4C2	10	9	0.541603	0.0135985	0.0299399	FALSE	95	77	0.277621
Q3ULJ0	Q3ULJ0	>sp|Q3ULJ0|GPD1L_MOUSE Glycerol-3-phosphate dehydrogenase 1-like protein OS=Mus musculus (Mouse) OX=10090 GN=Gpd1l PE=1 SV=2	GPD1L	10	10	-0.340664	2.26215e-05	0.000113928	TRUE	97	80	0.238506
Q2WF71	Q2WF71	>sp|Q2WF71|LRFN1_MOUSE Leucine-rich repeat and fibronectin type III domain-containing protein 1 OS=Mus musculus (Mouse) OX=10090 GN=Lrfn1 PE=1 SV=1	LRFN1	8	4	0.141353	0.187224	0.275443	FALSE	57	49	0.137559
P06837	P06837	>sp|P06837|NEUM_MOUSE Neuromodulin OS=Mus musculus (Mouse) OX=10090 GN=Gap43 PE=1 SV=1	GAP43	14	9	-0.55674	3.38454e-06	2.21839e-05	TRUE	97	96	-0.129065
O54782	O54782	>sp|O54782|MA2B2_MOUSE Epididymis-specific alpha-mannosidase OS=Mus musculus (Mouse) OX=10090 GN=Man2b2 PE=1 SV=2	MAN2B2	6	1	-0.536317	0.0389246	0.0729954	FALSE	20	38	-1.42915
P60879	P60879	>sp|P60879|SNP25_MOUSE Synaptosomal-associated protein 25 OS=Mus musculus (Mouse) OX=10090 GN=Snap25 PE=1 SV=1	SNAP25	19	12	-0.847449	2.69049e-07	2.60578e-06	TRUE	141	127	0.0589278
O35988	O35988	>sp|O35988|SDC4_MOUSE Syndecan-4 OS=Mus musculus (Mouse) OX=10090 GN=Sdc4 PE=1 SV=1	SDC4	5	2	-0.845235	1.14954e-05	6.29918e-05	TRUE	30	28	-0.0180423
Q91YJ2	Q91YJ2	>sp|Q91YJ2|SNX4_MOUSE Sorting nexin-4 OS=Mus musculus (Mouse) OX=10090 GN=Snx4 PE=1 SV=1	SNX4	18	17	0.365268	2.11884e-05	0.000107109	TRUE	178	139	0.355014
B8QI36	B8QI36	>tr|B8QI36|B8QI36_MOUSE Liprin-alpha 4 OS=Mus musculus (Mouse) OX=10090 GN=Ppfia4 PE=1 SV=1	PPFIA4	8	1	-0.269748	0.284412	0.385462	FALSE	26	34	-0.700045
O88737	O88737	>sp|O88737|BSN_MOUSE Protein bassoon OS=Mus musculus (Mouse) OX=10090 GN=Bsn PE=1 SV=4	BSN	9	1	-1.17959	9.92521e-06	5.52262e-05	TRUE	33	39	-0.533598
Q8R0T6	Q8R0T6	>sp|Q8R0T6|AGRG3_MOUSE Adhesion G protein-coupled receptor G3 OS=Mus musculus (Mouse) OX=10090 GN=Adgrg3 PE=2 SV=3	ADGRG3	1	1	0.563986	0.000125456	0.000494339	TRUE	10	7	0.523101
Q8BT60;Q8C166	Q8BT60;Q8C166	>sp|Q8BT60|CPNE3_MOUSE Copine-3 OS=Mus musculus (Mouse) OX=10090 GN=Cpne3 PE=1 SV=2;>sp|Q8C166|CPNE1_MOUSE Copine-1 OS=Mus musculus (Mouse) OX=10090 GN=Cpne1 PE=1 SV=1	CPNE3;CPNE1	1	1	-0.717327	9.48727e-06	5.32823e-05	TRUE	10	8	0.266117
Q9WUM3	Q9WUM3	>sp|Q9WUM3|COR1B_MOUSE Coronin-1B OS=Mus musculus (Mouse) OX=10090 GN=Coro1b PE=1 SV=1	CORO1B	10	10	-0.705132	6.71127e-08	8.09238e-07	TRUE	94	78	0.229527
Q80Z24	Q80Z24	>sp|Q80Z24|NEGR1_MOUSE Neuronal growth regulator 1 OS=Mus musculus (Mouse) OX=10090 GN=Negr1 PE=1 SV=1	NEGR1	6	6	0.615374	3.64255e-08	4.93019e-07	TRUE	60	47	0.342291
Q8K3C3	Q8K3C3	>sp|Q8K3C3|LZIC_MOUSE Protein LZIC OS=Mus musculus (Mouse) OX=10090 GN=Lzic PE=1 SV=1	LZIC	4	2	-0.319173	0.00749135	0.0177945	FALSE	24	25	-0.25088
Q8HW98	Q8HW98	>sp|Q8HW98|IGLO5_MOUSE IgLON family member 5 OS=Mus musculus (Mouse) OX=10090 GN=Iglon5 PE=2 SV=2	IGLON5	6	4	-0.536235	2.14743e-06	1.48293e-05	TRUE	51	45	0.0952927
Q80UG2	Q80UG2	>sp|Q80UG2|PLXA4_MOUSE Plexin-A4 OS=Mus musculus (Mouse) OX=10090 GN=Plxna4 PE=1 SV=3	PLXNA4	30	21	0.0514077	0.856988	0.896394	FALSE	243	190	0.346074
Q6PAM0	Q6PAM0	>sp|Q6PAM0|AAKB2_MOUSE 5'-AMP-activated protein kinase subunit beta-2 OS=Mus musculus (Mouse) OX=10090 GN=Prkab2 PE=1 SV=1	PRKAB2	5	1	-0.812388	5.50008e-05	0.000242883	TRUE	15	29	-1.47862
B9EJI9	B9EJI9	>sp|B9EJI9|T229A_MOUSE Transmembrane protein 229A OS=Mus musculus (Mouse) OX=10090 GN=Tmem229a PE=2 SV=1	TMEM229A	2	0					0	10	-5.2022
Q7TSC1	Q7TSC1	>sp|Q7TSC1|PRC2A_MOUSE Protein PRRC2A OS=Mus musculus (Mouse) OX=10090 GN=Prrc2a PE=1 SV=1	PRRC2A	3	1	-0.18878	0.481551	0.58051	FALSE	18	17	-0.00458932
Q8BWR2	Q8BWR2	>sp|Q8BWR2|PITH1_MOUSE PITH domain-containing protein 1 OS=Mus musculus (Mouse) OX=10090 GN=Pithd1 PE=1 SV=1	PITHD1	4	4	0.491021	1.86081e-05	9.62219e-05	TRUE	40	32	0.297538
P43135	P43135	>sp|P43135|COT2_MOUSE COUP transcription factor 2 OS=Mus musculus (Mouse) OX=10090 GN=Nr2f2 PE=1 SV=2	NR2F2	1	1	0.152003	0.38601	0.491384	FALSE	8	7	0.063965
Q76MZ3	Q76MZ3	>sp|Q76MZ3|2AAA_MOUSE Serine/threonine-protein phosphatase 2A 65 kDa regulatory subunit A alpha isoform OS=Mus musculus (Mouse) OX=10090 GN=Ppp2r1a PE=1 SV=3	PPP2R1A	21	16	-0.210586	0.000213923	0.000785739	FALSE	178	148	0.227756
P62751	P62751	>sp|P62751|RL23A_MOUSE 60S ribosomal protein L23a OS=Mus musculus (Mouse) OX=10090 GN=Rpl23a PE=1 SV=1	RPL23A	8	8	0.252029	0.000837628	0.00257747	FALSE	79	64	0.277754
O70305	O70305	>sp|O70305|ATX2_MOUSE Ataxin-2 OS=Mus musculus (Mouse) OX=10090 GN=Atxn2 PE=1 SV=1	ATXN2	11	3	-1.26543	6.75861e-09	1.2197e-07	TRUE	48	78	-1.13827
Q5F2E7	Q5F2E7	>sp|Q5F2E7|NUFP2_MOUSE Nuclear fragile X mental retardation-interacting protein 2 OS=Mus musculus (Mouse) OX=10090 GN=Nufip2 PE=1 SV=1	NUFIP2	7	0					9	45	-3.3306
Q9D8W7	Q9D8W7	>sp|Q9D8W7|OCAD2_MOUSE OCIA domain-containing protein 2 OS=Mus musculus (Mouse) OX=10090 GN=Ociad2 PE=1 SV=1	OCIAD2	3	3	0.0749632	0.387929	0.4929	FALSE	29	24	0.215695
Q9DBL2	Q9DBL2	>sp|Q9DBL2|GDAP2_MOUSE Ganglioside-induced differentiation-associated protein 2 OS=Mus musculus (Mouse) OX=10090 GN=Gdap2 PE=1 SV=1	GDAP2	5	1	-0.898643	5.24416e-05	0.00023272	TRUE	27	30	-0.346955
P40336	P40336	>sp|P40336|VP26A_MOUSE Vacuolar protein sorting-associated protein 26A OS=Mus musculus (Mouse) OX=10090 GN=Vps26a PE=1 SV=1	VPS26A	13	13	-0.141523	0.0132055	0.0291934	FALSE	129	101	0.34789
P63002	P63002	>sp|P63002|TLE5_MOUSE TLE family member 5 OS=Mus musculus (Mouse) OX=10090 GN=Tle5 PE=1 SV=1	TLE5	1	1	-0.144895	0.314884	0.416918	FALSE	10	8	0.266117
Q6P3D0	Q6P3D0	>sp|Q6P3D0|NUD16_MOUSE U8 snoRNA-decapping enzyme OS=Mus musculus (Mouse) OX=10090 GN=Nudt16 PE=1 SV=1	NUDT16	2	1	-0.29022	0.0950549	0.155242	FALSE	15	10	0.656953
Q5F2E8	Q5F2E8	>sp|Q5F2E8|TAOK1_MOUSE Serine/threonine-protein kinase TAO1 OS=Mus musculus (Mouse) OX=10090 GN=Taok1 PE=1 SV=1	TAOK1	7	4	-0.0439224	0.595512	0.681917	FALSE	52	46	0.0923092
P08414	P08414	>sp|P08414|KCC4_MOUSE Calcium/calmodulin-dependent protein kinase type IV OS=Mus musculus (Mouse) OX=10090 GN=Camk4 PE=1 SV=2	CAMK4	13	7	-0.214561	0.0711582	0.121799	FALSE	105	89	0.161593
Q80XU3	Q80XU3	>sp|Q80XU3|NUCKS_MOUSE Nuclear ubiquitous casein and cyclin-dependent kinase substrate 1 OS=Mus musculus (Mouse) OX=10090 GN=Nucks1 PE=1 SV=1	NUCKS1	2	1	-0.278947	0.397944	0.50291	FALSE	9	8	0.0573934
Q9CZB0	Q9CZB0	>sp|Q9CZB0|C560_MOUSE Succinate dehydrogenase cytochrome b560 subunit, mitochondrial OS=Mus musculus (Mouse) OX=10090 GN=Sdhc PE=1 SV=1	SDHC	3	2	-0.574188	0.00033661	0.00116896	TRUE	25	22	0.0977352
Q8CG76	Q8CG76	>sp|Q8CG76|ARK72_MOUSE Aflatoxin B1 aldehyde reductase member 2 OS=Mus musculus (Mouse) OX=10090 GN=Akr7a2 PE=1 SV=3	AKR7A2	9	8	0.173853	0.00655166	0.0157717	FALSE	81	67	0.231502
Q9WU28	Q9WU28	>sp|Q9WU28|PFD5_MOUSE Prefoldin subunit 5 OS=Mus musculus (Mouse) OX=10090 GN=Pfdn5 PE=1 SV=1	PFDN5	5	2	-0.178504	0.0536034	0.0956521	FALSE	33	29	0.108054
Q80WJ7	Q80WJ7	>sp|Q80WJ7|LYRIC_MOUSE Protein LYRIC OS=Mus musculus (Mouse) OX=10090 GN=Mtdh PE=1 SV=1	MTDH	16	9	-0.526284	2.18984e-06	1.50454e-05	TRUE	107	105	-0.124607
Q99MK8	Q99MK8	>sp|Q99MK8|ARBK1_MOUSE Beta-adrenergic receptor kinase 1 OS=Mus musculus (Mouse) OX=10090 GN=Grk2 PE=1 SV=2	GRK2	16	2	-1.14922	9.95112e-09	1.66282e-07	TRUE	87	121	-0.853809
Q62426	Q62426	>sp|Q62426|CYTB_MOUSE Cystatin-B OS=Mus musculus (Mouse) OX=10090 GN=Cstb PE=1 SV=1	CSTB	4	3	-0.346591	0.00321599	0.00833877	TRUE	30	25	0.222369
Q91WG7	Q91WG7	>sp|Q91WG7|DGKG_MOUSE Diacylglycerol kinase gamma OS=Mus musculus (Mouse) OX=10090 GN=Dgkg PE=1 SV=1	DGKG	9	3	-0.615581	4.39727e-05	0.000200732	TRUE	53	55	-0.21121
Q6PER3	Q6PER3	>sp|Q6PER3|MARE3_MOUSE Microtubule-associated protein RP/EB family member 3 OS=Mus musculus (Mouse) OX=10090 GN=Mapre3 PE=1 SV=1	MAPRE3	8	4	-1.17673	5.07529e-11	2.59223e-09	TRUE	59	55	-0.0184315
Q9QZ23	Q9QZ23	>sp|Q9QZ23|NFU1_MOUSE NFU1 iron-sulfur cluster scaffold homolog, mitochondrial OS=Mus musculus (Mouse) OX=10090 GN=Nfu1 PE=1 SV=2	NFU1	5	5	-0.30246	0.000607562	0.00194982	TRUE	45	39	0.135476
Q8BFP9;Q922H2	Q8BFP9;Q922H2	>sp|Q8BFP9|PDK1_MOUSE [Pyruvate dehydrogenase (acetyl-transferring)] kinase isozyme 1, mitochondrial OS=Mus musculus (Mouse) OX=10090 GN=Pdk1 PE=1 SV=2;>sp|Q922H2|PDK3_MOUSE [Pyruvate dehydrogenase (acetyl-transferring)] kinase isozyme 3, mitochondrial OS=Mus musculus (Mouse) OX=10090 GN=Pdk3 PE=1 SV=1	PDK1;PDK3	1	1	0.355119	0.0110048	0.0248976	FALSE	10	8	0.266117
Q91YL2	Q91YL2	>sp|Q91YL2|RN126_MOUSE E3 ubiquitin-protein ligase RNF126 OS=Mus musculus (Mouse) OX=10090 GN=Rnf126 PE=1 SV=1	RNF126	2	1	-0.256994	0.104049	0.167905	FALSE	14	11	0.339782
Q8BL66	Q8BL66	>sp|Q8BL66|EEA1_MOUSE Early endosome antigen 1 OS=Mus musculus (Mouse) OX=10090 GN=Eea1 PE=1 SV=2	EEA1	31	18	-0.302171	0.00116218	0.00343453	TRUE	229	207	0.0524563
Q8K337	Q8K337	>sp|Q8K337|I5P2_MOUSE Type II inositol 1,4,5-trisphosphate 5-phosphatase OS=Mus musculus (Mouse) OX=10090 GN=Inpp5b PE=1 SV=1	INPP5B	4	1	-0.902097	0.000296416	0.00104309	TRUE	25	20	0.262892
Q60865	Q60865	>sp|Q60865|CAPR1_MOUSE Caprin-1 OS=Mus musculus (Mouse) OX=10090 GN=Caprin1 PE=1 SV=2	CAPRIN1	12	6	-0.925495	1.31681e-07	1.43445e-06	TRUE	78	82	-0.250739
Q9D0V7	Q9D0V7	>sp|Q9D0V7|RCAS1_MOUSE Receptor-binding cancer antigen expressed on SiSo cells OS=Mus musculus (Mouse) OX=10090 GN=Ebag9 PE=1 SV=2	EBAG9	1	1	-0.60573	0.0101556	0.0232582	FALSE	10	8	0.266117
A0A2I3BQ48	A0A2I3BQ48	>tr|A0A2I3BQ48|A0A2I3BQ48_MOUSE Diacylglycerol kinase OS=Mus musculus (Mouse) OX=10090 GN=Dgkh PE=1 SV=1	DGKH	14	11	0.150851	0.0942812	0.154118	FALSE	113	93	0.245486
Q8N9S3	Q8N9S3	>sp|Q8N9S3|AHSA2_MOUSE Activator of 90 kDa heat shock protein ATPase homolog 2 OS=Mus musculus (Mouse) OX=10090 GN=Ahsa2 PE=1 SV=2	AHSA2	3	3	0.0443856	0.703516	0.771644	FALSE	26	22	0.175351
Q8BYB9	Q8BYB9	>sp|Q8BYB9|PGLT1_MOUSE Protein O-glucosyltransferase 1 OS=Mus musculus (Mouse) OX=10090 GN=Poglut1 PE=1 SV=2	POGLUT1	5	2	-0.733503	6.19145e-05	0.000267522	TRUE	28	32	-0.440188
P46662	P46662	>sp|P46662|MERL_MOUSE Merlin OS=Mus musculus (Mouse) OX=10090 GN=Nf2 PE=1 SV=2	NF2	2	1	0.0211825	0.924953	0.944189	FALSE	9	10	-0.361364
A2AWA9	A2AWA9	>sp|A2AWA9|RBGP1_MOUSE Rab GTPase-activating protein 1 OS=Mus musculus (Mouse) OX=10090 GN=Rabgap1 PE=1 SV=1	RABGAP1	16	15	-0.274105	1.75549e-05	9.12115e-05	TRUE	143	121	0.187927
Q6PF93	Q6PF93	>sp|Q6PF93|PK3C3_MOUSE Phosphatidylinositol 3-kinase catalytic subunit type 3 OS=Mus musculus (Mouse) OX=10090 GN=Pik3c3 PE=1 SV=1	PIK3C3	4	1	0.0220036	0.863367	0.90115	FALSE	25	27	-0.322461
Q8R180	Q8R180	>sp|Q8R180|ERO1A_MOUSE ERO1-like protein alpha OS=Mus musculus (Mouse) OX=10090 GN=Ero1a PE=1 SV=2	ERO1A	8	2	-0.242525	0.0849573	0.141265	FALSE	58	54	-0.0259055
Q9WVS7	Q9WVS7	>sp|Q9WVS7|MP2K5_MOUSE Dual specificity mitogen-activated protein kinase kinase 5 OS=Mus musculus (Mouse) OX=10090 GN=Map2k5 PE=1 SV=1	MAP2K5	1	1	-0.0491225	0.76799	0.823672	FALSE	8	8	-0.154346
Q62442	Q62442	>sp|Q62442|VAMP1_MOUSE Vesicle-associated membrane protein 1 OS=Mus musculus (Mouse) OX=10090 GN=Vamp1 PE=1 SV=1	VAMP1	4	0					15	30	-1.59071
P12265	P12265	>sp|P12265|BGLR_MOUSE Beta-glucuronidase OS=Mus musculus (Mouse) OX=10090 GN=Gusb PE=1 SV=2	GUSB	11	1	-0.945521	0.000269269	0.000957833	TRUE	23	55	-1.94001
P61967	P61967	>sp|P61967|AP1S1_MOUSE AP-1 complex subunit sigma-1A OS=Mus musculus (Mouse) OX=10090 GN=Ap1s1 PE=1 SV=1	AP1S1	5	3	-0.163406	0.0605287	0.105847	FALSE	41	36	0.117618
Q91VW3	Q91VW3	>sp|Q91VW3|SH3L3_MOUSE SH3 domain-binding glutamic acid-rich-like protein 3 OS=Mus musculus (Mouse) OX=10090 GN=Sh3bgrl3 PE=1 SV=1	SH3BGRL3	4	2	-0.35232	0.04528	0.0828259	FALSE	26	29	-0.381704
Q91W86	Q91W86	>sp|Q91W86|VPS11_MOUSE Vacuolar protein sorting-associated protein 11 homolog OS=Mus musculus (Mouse) OX=10090 GN=Vps11 PE=1 SV=3	VPS11	19	13	-0.190473	0.000688643	0.00217775	FALSE	154	136	0.0879941
Q9JJV2	Q9JJV2	>sp|Q9JJV2|PROF2_MOUSE Profilin-2 OS=Mus musculus (Mouse) OX=10090 GN=Pfn2 PE=1 SV=3	PFN2	5	4	-0.571992	9.40031e-05	0.000384972	TRUE	45	37	0.243768
Q9CRG1	Q9CRG1	>sp|Q9CRG1|TM7S3_MOUSE Transmembrane 7 superfamily member 3 OS=Mus musculus (Mouse) OX=10090 GN=Tm7sf3 PE=2 SV=2	TM7SF3	7	1	-0.918535	5.50206e-07	4.7358e-06	TRUE	25	44	-1.29369
Q8BIJ7;Q8R4C2;Q9D394	Q8BIJ7;Q8R4C2;Q9D394	>sp|Q8BIJ7|RUFY1_MOUSE RUN and FYVE domain-containing protein 1 OS=Mus musculus (Mouse) OX=10090 GN=Rufy1 PE=1 SV=1;>sp|Q8R4C2|RUFY2_MOUSE RUN and FYVE domain-containing protein 2 OS=Mus musculus (Mouse) OX=10090 GN=Rufy2 PE=1 SV=2;>sp|Q9D394|RUFY3_MOUSE Protein RUFY3 OS=Mus musculus (Mouse) OX=10090 GN=Rufy3 PE=1 SV=1	RUFY1;RUFY2;RUFY3	1	1	-0.25021	0.0265141	0.0528719	FALSE	10	8	0.266117
O88384	O88384	>sp|O88384|VTI1B_MOUSE Vesicle transport through interaction with t-SNAREs homolog 1B OS=Mus musculus (Mouse) OX=10090 GN=Vti1b PE=1 SV=1	VTI1B	8	8	0.175437	0.0276422	0.0547183	FALSE	76	63	0.229427
P08752	P08752	>sp|P08752|GNAI2_MOUSE Guanine nucleotide-binding protein G(i) subunit alpha-2 OS=Mus musculus (Mouse) OX=10090 GN=Gnai2 PE=1 SV=5	GNAI2	7	7	-0.139279	0.0435424	0.080156	FALSE	68	56	0.242705
Q5M956	Q5M956	>sp|Q5M956|KCTD1_MOUSE BTB/POZ domain-containing protein KCTD1 OS=Mus musculus (Mouse) OX=10090 GN=Kctd1 PE=1 SV=1	KCTD1	1	0					6	7	-0.468167
O88809	O88809	>sp|O88809|DCX_MOUSE Neuronal migration protein doublecortin OS=Mus musculus (Mouse) OX=10090 GN=Dcx PE=1 SV=1	DCX	8	8	0.263092	0.026891	0.0534463	FALSE	79	60	0.411462
O35639	O35639	>sp|O35639|ANXA3_MOUSE Annexin A3 OS=Mus musculus (Mouse) OX=10090 GN=Anxa3 PE=1 SV=4	ANXA3	11	3	-0.228452	0.367312	0.472134	FALSE	36	55	-1.02665
Q9CR09	Q9CR09	>sp|Q9CR09|UFC1_MOUSE Ubiquitin-fold modifier-conjugating enzyme 1 OS=Mus musculus (Mouse) OX=10090 GN=Ufc1 PE=1 SV=1	UFC1	3	3	-0.134103	0.157836	0.238628	FALSE	27	21	0.350722
Q80SY4	Q80SY4	>sp|Q80SY4|MIB1_MOUSE E3 ubiquitin-protein ligase MIB1 OS=Mus musculus (Mouse) OX=10090 GN=Mib1 PE=1 SV=1	MIB1	3	1	0.140304	0.372666	0.477441	FALSE	23	17	0.435492
Q9CR27	Q9CR27	>sp|Q9CR27|WASC3_MOUSE WASH complex subunit 3 OS=Mus musculus (Mouse) OX=10090 GN=Washc3 PE=1 SV=1	WASHC3	1	1	0.260578	0.211293	0.303916	FALSE	8	6	0.379651
P53810	P53810	>sp|P53810|PIPNA_MOUSE Phosphatidylinositol transfer protein alpha isoform OS=Mus musculus (Mouse) OX=10090 GN=Pitpna PE=1 SV=2	PITPNA	16	15	-0.309815	0.000384062	0.00130446	TRUE	151	121	0.30123
Q7TMK9	Q7TMK9	>sp|Q7TMK9|HNRPQ_MOUSE Heterogeneous nuclear ribonucleoprotein Q OS=Mus musculus (Mouse) OX=10090 GN=Syncrip PE=1 SV=2	SYNCRIP	21	17	-0.178627	0.00108934	0.00324579	FALSE	179	159	0.083969
P29341	P29341	>sp|P29341|PABP1_MOUSE Polyadenylate-binding protein 1 OS=Mus musculus (Mouse) OX=10090 GN=Pabpc1 PE=1 SV=2	PABPC1	25	21	-0.485476	9.19374e-08	1.05904e-06	TRUE	221	189	0.169466
Q9JKK1	Q9JKK1	>sp|Q9JKK1|STX6_MOUSE Syntaxin-6 OS=Mus musculus (Mouse) OX=10090 GN=Stx6 PE=1 SV=1	STX6	6	5	0.0520965	0.501791	0.600242	FALSE	56	44	0.338198
Q9Z0H3	Q9Z0H3	>sp|Q9Z0H3|SNF5_MOUSE SWI/SNF-related matrix-associated actin-dependent regulator of chromatin subfamily B member 1 OS=Mus musculus (Mouse) OX=10090 GN=Smarcb1 PE=1 SV=1	SMARCB1	5	3	-0.0577106	0.620354	0.703961	FALSE	38	33	0.145781
Q8CFI5	Q8CFI5	>sp|Q8CFI5|SYPM_MOUSE Probable proline--tRNA ligase, mitochondrial OS=Mus musculus (Mouse) OX=10090 GN=Pars2 PE=1 SV=2	PARS2	5	3	0.133665	0.281149	0.382255	FALSE	43	34	0.311177
O88343	O88343	>sp|O88343|S4A4_MOUSE Electrogenic sodium bicarbonate cotransporter 1 OS=Mus musculus (Mouse) OX=10090 GN=Slc4a4 PE=1 SV=2	SLC4A4	23	5	-2.33945	1.51489e-10	5.90043e-09	TRUE	65	124	-1.48906
O88958;Q9CRC9	O88958;Q9CRC9	>sp|O88958|GNPI1_MOUSE Glucosamine-6-phosphate isomerase 1 OS=Mus musculus (Mouse) OX=10090 GN=Gnpda1 PE=1 SV=3;>sp|Q9CRC9|GNPI2_MOUSE Glucosamine-6-phosphate isomerase 2 OS=Mus musculus (Mouse) OX=10090 GN=Gnpda2 PE=1 SV=1	GNPDA1;GNPDA2	2	2	-0.533138	4.68791e-06	2.924e-05	TRUE	20	16	0.286542
Q8R3C0	Q8R3C0	>sp|Q8R3C0|MCMBP_MOUSE Mini-chromosome maintenance complex-binding protein OS=Mus musculus (Mouse) OX=10090 GN=Mcmbp PE=1 SV=1	MCMBP	4	0					18	22	-0.592102
Q9D1I5	Q9D1I5	>sp|Q9D1I5|MCEE_MOUSE Methylmalonyl-CoA epimerase, mitochondrial OS=Mus musculus (Mouse) OX=10090 GN=Mcee PE=1 SV=1	MCEE	2	2	0.471352	0.00413643	0.0104161	FALSE	20	14	0.55236
Q9ES56	Q9ES56	>sp|Q9ES56|TPPC4_MOUSE Trafficking protein particle complex subunit 4 OS=Mus musculus (Mouse) OX=10090 GN=Trappc4 PE=1 SV=1	TRAPPC4	10	8	0.00782543	0.907929	0.933092	FALSE	91	73	0.300863
Q8JZV7	Q8JZV7	>sp|Q8JZV7|NAGA_MOUSE N-acetylglucosamine-6-phosphate deacetylase OS=Mus musculus (Mouse) OX=10090 GN=Amdhd2 PE=1 SV=1	AMDHD2	3	1	0.110432	0.516808	0.614	FALSE	21	14	0.650874
Q61598	Q61598	>sp|Q61598|GDIB_MOUSE Rab GDP dissociation inhibitor beta OS=Mus musculus (Mouse) OX=10090 GN=Gdi2 PE=1 SV=1	GDI2	20	18	-0.301996	1.97539e-05	0.000101085	TRUE	190	155	0.266854
P01831	P01831	>sp|P01831|THY1_MOUSE Thy-1 membrane glycoprotein OS=Mus musculus (Mouse) OX=10090 GN=Thy1 PE=1 SV=1	THY1	4	3	-1.59782	3.09193e-12	3.48744e-10	TRUE	36	32	0.0727866
Q5F2E8;Q6ZQ29	Q5F2E8;Q6ZQ29	>sp|Q5F2E8|TAOK1_MOUSE Serine/threonine-protein kinase TAO1 OS=Mus musculus (Mouse) OX=10090 GN=Taok1 PE=1 SV=1;>sp|Q6ZQ29|TAOK2_MOUSE Serine/threonine-protein kinase TAO2 OS=Mus musculus (Mouse) OX=10090 GN=Taok2 PE=1 SV=3	TAOK1;TAOK2	1	1	-0.439327	0.0262859	0.0525136	FALSE	10	8	0.266117
Q8BFT9	Q8BFT9	>sp|Q8BFT9|SVOP_MOUSE Synaptic vesicle 2-related protein OS=Mus musculus (Mouse) OX=10090 GN=Svop PE=1 SV=1	SVOP	5	4	-0.472693	2.394e-06	1.63444e-05	TRUE	42	34	0.267629
Q9WV98	Q9WV98	>sp|Q9WV98|TIM9_MOUSE Mitochondrial import inner membrane translocase subunit Tim9 OS=Mus musculus (Mouse) OX=10090 GN=Timm9 PE=1 SV=1	TIMM9	3	1	-0.29397	0.161633	0.243551	FALSE	23	19	0.212972
Q641P0;Q99JY9	Q641P0;Q99JY9	>sp|Q641P0|ARP3B_MOUSE Actin-related protein 3B OS=Mus musculus (Mouse) OX=10090 GN=Actr3b PE=1 SV=1;>sp|Q99JY9|ARP3_MOUSE Actin-related protein 3 OS=Mus musculus (Mouse) OX=10090 GN=Actr3 PE=1 SV=3	ACTR3B;ACTR3	4	4	-0.586113	8.70727e-05	0.000359034	TRUE	38	32	0.197089
A6H6A9	A6H6A9	>sp|A6H6A9|RBG1L_MOUSE Rab GTPase-activating protein 1-like OS=Mus musculus (Mouse) OX=10090 GN=Rabgap1l PE=1 SV=1	RABGAP1L	7	3	-0.0571264	0.564151	0.655292	FALSE	48	44	-0.00189845
Q7M6Z0	Q7M6Z0	>sp|Q7M6Z0|R4RL2_MOUSE Reticulon-4 receptor-like 2 OS=Mus musculus (Mouse) OX=10090 GN=Rtn4rl2 PE=1 SV=1	RTN4RL2	3	3	-0.0430542	0.648329	0.727472	FALSE	30	23	0.382258
Q68EF0	Q68EF0	>sp|Q68EF0|RAB3I_MOUSE Rab-3A-interacting protein OS=Mus musculus (Mouse) OX=10090 GN=Rab3ip PE=1 SV=1	RAB3IP	2	1	-0.742341	3.21584e-05	0.000152993	TRUE	16	15	-0.01489
Q3UQ44	Q3UQ44	>sp|Q3UQ44|IQGA2_MOUSE Ras GTPase-activating-like protein IQGAP2 OS=Mus musculus (Mouse) OX=10090 GN=Iqgap2 PE=1 SV=2	IQGAP2	18	7	-0.0271305	0.762745	0.81969	FALSE	134	105	0.338865
B1AYL1	B1AYL1	>tr|B1AYL1|B1AYL1_MOUSE Sodium channel protein OS=Mus musculus (Mouse) OX=10090 GN=Scn7a PE=1 SV=1	SCN7A	1	1	-0.947315	0.00140761	0.00403217	TRUE	10	8	0.266117
Q11136	Q11136	>sp|Q11136|PEPD_MOUSE Xaa-Pro dipeptidase OS=Mus musculus (Mouse) OX=10090 GN=Pepd PE=1 SV=3	PEPD	11	8	-0.0956006	0.27807	0.379128	FALSE	87	72	0.234359
O08747	O08747	>sp|O08747|UNC5C_MOUSE Netrin receptor UNC5C OS=Mus musculus (Mouse) OX=10090 GN=Unc5c PE=1 SV=1	UNC5C	3	0					7	20	-2.14253
Q9Z0N1;Q9Z0N2	Q9Z0N1;Q9Z0N2	>sp|Q9Z0N1|IF2G_MOUSE Eukaryotic translation initiation factor 2 subunit 3, X-linked OS=Mus musculus (Mouse) OX=10090 GN=Eif2s3x PE=1 SV=2;>sp|Q9Z0N2|IF2H_MOUSE Eukaryotic translation initiation factor 2 subunit 3, Y-linked OS=Mus musculus (Mouse) OX=10090 GN=Eif2s3y PE=1 SV=2	EIF2S3X;EIF2S3Y	8	7	-0.0166777	0.780603	0.834029	FALSE	75	63	0.201582
Q9QUR6	Q9QUR6	>sp|Q9QUR6|PPCE_MOUSE Prolyl endopeptidase OS=Mus musculus (Mouse) OX=10090 GN=Prep PE=1 SV=1	PREP	29	21	-0.57043	6.90158e-11	3.29438e-09	TRUE	239	215	0.0644535
Q924S7	Q924S7	>sp|Q924S7|SPRE2_MOUSE Sprouty-related, EVH1 domain-containing protein 2 OS=Mus musculus (Mouse) OX=10090 GN=Spred2 PE=1 SV=1	SPRED2	2	1	0.0150957	0.912317	0.936155	FALSE	15	11	0.456327
O88447;O88448;Q9DBS5	O88447;O88448;Q9DBS5	>sp|O88447|KLC1_MOUSE Kinesin light chain 1 OS=Mus musculus (Mouse) OX=10090 GN=Klc1 PE=1 SV=3;>sp|O88448|KLC2_MOUSE Kinesin light chain 2 OS=Mus musculus (Mouse) OX=10090 GN=Klc2 PE=1 SV=1;>sp|Q9DBS5|KLC4_MOUSE Kinesin light chain 4 OS=Mus musculus (Mouse) OX=10090 GN=Klc4 PE=1 SV=1	KLC1;KLC2;KLC4	1	1	-0.00900955	0.975914	0.982951	FALSE	10	7	0.514684
Q9Z2D0	Q9Z2D0	>sp|Q9Z2D0|MTMR9_MOUSE Myotubularin-related protein 9 OS=Mus musculus (Mouse) OX=10090 GN=Mtmr9 PE=1 SV=2	MTMR9	9	5	-0.0602098	0.478588	0.577978	FALSE	72	60	0.199691
Q3UTZ3	Q3UTZ3	>sp|Q3UTZ3|MA11_MOUSE Microtubule-associated protein 11 OS=Mus musculus (Mouse) OX=10090 GN=MAP11 PE=1 SV=1	MAP11	6	3	0.0965471	0.359082	0.462654	FALSE	47	35	0.43448
P56376	P56376	>sp|P56376|ACYP1_MOUSE Acylphosphatase-1 OS=Mus musculus (Mouse) OX=10090 GN=Acyp1 PE=1 SV=2	ACYP1	5	5	-0.340479	0.0245342	0.0494521	FALSE	50	40	0.299806
Q80X71	Q80X71	>sp|Q80X71|T106B_MOUSE Transmembrane protein 106B OS=Mus musculus (Mouse) OX=10090 GN=Tmem106b PE=1 SV=1	TMEM106B	7	7	-0.0907589	0.124631	0.195297	FALSE	66	55	0.211075
Q8BHZ0	Q8BHZ0	>sp|Q8BHZ0|FA49A_MOUSE Protein FAM49A OS=Mus musculus (Mouse) OX=10090 GN=Fam49a PE=1 SV=1	FAM49A	9	8	0.0278518	0.601238	0.686875	FALSE	81	65	0.296723
Q9JKD3	Q9JKD3	>sp|Q9JKD3|SCAM5_MOUSE Secretory carrier-associated membrane protein 5 OS=Mus musculus (Mouse) OX=10090 GN=Scamp5 PE=1 SV=1	SCAMP5	2	2	-0.485858	0.00186813	0.00517608	TRUE	20	16	0.286542
P97379	P97379	>sp|P97379|G3BP2_MOUSE Ras GTPase-activating protein-binding protein 2 OS=Mus musculus (Mouse) OX=10090 GN=G3bp2 PE=1 SV=2	G3BP2	15	10	-0.68866	1.58613e-07	1.67721e-06	TRUE	120	102	0.174931
Q99KC8	Q99KC8	>sp|Q99KC8|VMA5A_MOUSE von Willebrand factor A domain-containing protein 5A OS=Mus musculus (Mouse) OX=10090 GN=Vwa5a PE=1 SV=2	VWA5A	12	3	-1.29465	1.51145e-09	3.6695e-08	TRUE	59	87	-0.963303
Q91Y86;Q9WTU6	Q91Y86;Q9WTU6	>sp|Q91Y86|MK08_MOUSE Mitogen-activated protein kinase 8 OS=Mus musculus (Mouse) OX=10090 GN=Mapk8 PE=1 SV=1;>sp|Q9WTU6|MK09_MOUSE Mitogen-activated protein kinase 9 OS=Mus musculus (Mouse) OX=10090 GN=Mapk9 PE=1 SV=2	MAPK8;MAPK9	1	1	-0.202231	0.235297	0.330883	FALSE	9	8	0.0540382
Q14CH0	Q14CH0	>sp|Q14CH0|F171B_MOUSE Protein FAM171B OS=Mus musculus (Mouse) OX=10090 GN=Fam171b PE=1 SV=2	FAM171B	8	1	0.071113	0.651147	0.730029	FALSE	40	43	-0.304579
Q62425	Q62425	>sp|Q62425|NDUA4_MOUSE Cytochrome c oxidase subunit NDUFA4 OS=Mus musculus (Mouse) OX=10090 GN=Ndufa4 PE=1 SV=2	NDUFA4	5	4	-0.636646	0.0018347	0.00509911	TRUE	46	39	0.183499
Q8BIK4	Q8BIK4	>sp|Q8BIK4|DOCK9_MOUSE Dedicator of cytokinesis protein 9 OS=Mus musculus (Mouse) OX=10090 GN=Dock9 PE=1 SV=2	DOCK9	16	3	0.120728	0.541162	0.63513	FALSE	122	65	1.1038
O08917	O08917	>sp|O08917|FLOT1_MOUSE Flotillin-1 OS=Mus musculus (Mouse) OX=10090 GN=Flot1 PE=1 SV=1	FLOT1	21	20	-0.0277729	0.627396	0.710166	FALSE	205	167	0.26812
Q7SIG6	Q7SIG6	>sp|Q7SIG6|ASAP2_MOUSE Arf-GAP with SH3 domain, ANK repeat and PH domain-containing protein 2 OS=Mus musculus (Mouse) OX=10090 GN=Asap2 PE=1 SV=3	ASAP2	7	2	-0.122708	0.395103	0.500304	FALSE	50	30	0.869789
Q6Y685	Q6Y685	>sp|Q6Y685|TACC1_MOUSE Transforming acidic coiled-coil-containing protein 1 OS=Mus musculus (Mouse) OX=10090 GN=Tacc1 PE=1 SV=1	TACC1	6	0					12	25	-1.58372
O35127	O35127	>sp|O35127|C10_MOUSE Protein C10 OS=Mus musculus (Mouse) OX=10090 GN=Grcc10 PE=1 SV=1	GRCC10	3	0					10	15	-0.959269
P34022	P34022	>sp|P34022|RANG_MOUSE Ran-specific GTPase-activating protein OS=Mus musculus (Mouse) OX=10090 GN=Ranbp1 PE=1 SV=2	RANBP1	3	3	-0.231868	0.00954074	0.0220364	FALSE	30	24	0.293811
Q8R001	Q8R001	>sp|Q8R001|MARE2_MOUSE Microtubule-associated protein RP/EB family member 2 OS=Mus musculus (Mouse) OX=10090 GN=Mapre2 PE=1 SV=1	MAPRE2	12	6	-0.657626	1.79621e-06	1.28125e-05	TRUE	80	78	-0.104878
Q61151;Q6PD03	Q61151;Q6PD03	>sp|Q61151|2A5E_MOUSE Serine/threonine-protein phosphatase 2A 56 kDa regulatory subunit epsilon isoform OS=Mus musculus (Mouse) OX=10090 GN=Ppp2r5e PE=1 SV=3;>sp|Q6PD03|2A5A_MOUSE Serine/threonine-protein phosphatase 2A 56 kDa regulatory subunit alpha isoform OS=Mus musculus (Mouse) OX=10090 GN=Ppp2r5a PE=1 SV=1	PPP2R5E;PPP2R5A	2	2	-0.161065	0.0444894	0.0815113	FALSE	20	16	0.286542
O35969	O35969	>sp|O35969|GAMT_MOUSE Guanidinoacetate N-methyltransferase OS=Mus musculus (Mouse) OX=10090 GN=Gamt PE=1 SV=1	GAMT	4	2	-0.482504	2.34885e-05	0.000117421	TRUE	29	27	-0.00542631
Q8C5L6	Q8C5L6	>sp|Q8C5L6|INP5K_MOUSE Inositol polyphosphate 5-phosphatase K OS=Mus musculus (Mouse) OX=10090 GN=Inpp5k PE=1 SV=2	INPP5K	3	2	-0.0871156	0.393423	0.498827	FALSE	24	18	0.422192
Q9JJK2	Q9JJK2	>sp|Q9JJK2|LANC2_MOUSE LanC-like protein 2 OS=Mus musculus (Mouse) OX=10090 GN=Lancl2 PE=1 SV=1	LANCL2	11	9	0.062448	0.304794	0.406742	FALSE	96	76	0.321715
P39053;Q8BZ98	P39053;Q8BZ98	>sp|P39053|DYN1_MOUSE Dynamin-1 OS=Mus musculus (Mouse) OX=10090 GN=Dnm1 PE=1 SV=2;>sp|Q8BZ98|DYN3_MOUSE Dynamin-3 OS=Mus musculus (Mouse) OX=10090 GN=Dnm3 PE=1 SV=1	DNM1;DNM3	4	3	-0.48777	0.000223781	0.000818061	TRUE	30	24	0.285807
Q6PGF7	Q6PGF7	>sp|Q6PGF7|EXOC8_MOUSE Exocyst complex component 8 OS=Mus musculus (Mouse) OX=10090 GN=Exoc8 PE=1 SV=1	EXOC8	17	7	-0.386171	7.13882e-06	4.21938e-05	TRUE	102	105	-0.215579
Q9D7S7	Q9D7S7	>sp|Q9D7S7|RL22L_MOUSE 60S ribosomal protein L22-like 1 OS=Mus musculus (Mouse) OX=10090 GN=Rpl22l1 PE=1 SV=1	RPL22L1	2	2	-0.382632	0.00212491	0.00579853	TRUE	19	16	0.170049
Q9EP53	Q9EP53	>sp|Q9EP53|TSC1_MOUSE Hamartin OS=Mus musculus (Mouse) OX=10090 GN=Tsc1 PE=1 SV=1	TSC1	8	3	-0.0583583	0.659218	0.736334	FALSE	50	49	-0.122391
Q0VF55	Q0VF55	>tr|Q0VF55|Q0VF55_MOUSE Calcium-transporting ATPase OS=Mus musculus (Mouse) OX=10090 GN=Atp2b3 PE=1 SV=1	ATP2B3	14	12	-0.515411	1.00924e-06	7.87324e-06	TRUE	123	108	0.113885
Q8CGF6	Q8CGF6	>sp|Q8CGF6|WDR47_MOUSE WD repeat-containing protein 47 OS=Mus musculus (Mouse) OX=10090 GN=Wdr47 PE=1 SV=2	WDR47	19	15	0.15644	0.00485134	0.0120262	FALSE	171	138	0.282011
Q3UNH4	Q3UNH4	>sp|Q3UNH4|GRIN1_MOUSE G protein-regulated inducer of neurite outgrowth 1 OS=Mus musculus (Mouse) OX=10090 GN=Gprin1 PE=1 SV=2	GPRIN1	32	23	0.0175055	0.814408	0.861846	FALSE	275	230	0.214088
O88343;Q5DTL9;Q8JZR6	O88343;Q5DTL9;Q8JZR6	>sp|O88343|S4A4_MOUSE Electrogenic sodium bicarbonate cotransporter 1 OS=Mus musculus (Mouse) OX=10090 GN=Slc4a4 PE=1 SV=2;>sp|Q5DTL9|S4A10_MOUSE Sodium-driven chloride bicarbonate exchanger OS=Mus musculus (Mouse) OX=10090 GN=Slc4a10 PE=1 SV=2;>sp|Q8JZR6|S4A8_MOUSE Electroneutral sodium bicarbonate exchanger 1 OS=Mus musculus (Mouse) OX=10090 GN=Slc4a8 PE=2 SV=1	SLC4A4;SLC4A10;SLC4A8	1	1	-0.653982	4.29513e-05	0.000196566	TRUE	10	8	0.266117
P28741	P28741	>sp|P28741|KIF3A_MOUSE Kinesin-like protein KIF3A OS=Mus musculus (Mouse) OX=10090 GN=Kif3a PE=1 SV=2	KIF3A	18	14	0.160355	0.0154903	0.0334788	FALSE	159	125	0.338914
Q9CQJ2	Q9CQJ2	>sp|Q9CQJ2|PIHD1_MOUSE PIH1 domain-containing protein 1 OS=Mus musculus (Mouse) OX=10090 GN=Pih1d1 PE=1 SV=1	PIH1D1	4	4	-0.215665	0.0156598	0.0338047	FALSE	38	29	0.402116
E9Q236	E9Q236	>tr|E9Q236|E9Q236_MOUSE ATP-binding cassette, sub-family C (CFTR/MRP), member 4 OS=Mus musculus (Mouse) OX=10090 GN=Abcc4 PE=1 SV=1	ABCC4	13	0					10	45	-3.13304
Q8CES0	Q8CES0	>sp|Q8CES0|NAA30_MOUSE N-alpha-acetyltransferase 30 OS=Mus musculus (Mouse) OX=10090 GN=Naa30 PE=1 SV=2	NAA30	5	3	-0.259431	0.0294874	0.0577046	FALSE	40	33	0.24603
Q9DAZ9	Q9DAZ9	>sp|Q9DAZ9|ANCHR_MOUSE Abscission/NoCut checkpoint regulator OS=Mus musculus (Mouse) OX=10090 GN=Zfyve19 PE=1 SV=2	ZFYVE19	1	1	-1.20056	1.37167e-06	1.016e-05	TRUE	9	8	0.0540382
O35066;Q61771	O35066;Q61771	>sp|O35066|KIF3C_MOUSE Kinesin-like protein KIF3C OS=Mus musculus (Mouse) OX=10090 GN=Kif3c PE=1 SV=3;>sp|Q61771|KIF3B_MOUSE Kinesin-like protein KIF3B OS=Mus musculus (Mouse) OX=10090 GN=Kif3b PE=1 SV=1	KIF3C;KIF3B	3	3	0.128634	0.172596	0.256713	FALSE	30	22	0.46548
P70188	P70188	>sp|P70188|KIFA3_MOUSE Kinesin-associated protein 3 OS=Mus musculus (Mouse) OX=10090 GN=Kifap3 PE=1 SV=1	KIFAP3	7	6	0.0899685	0.224459	0.319769	FALSE	65	50	0.38766
P41731	P41731	>sp|P41731|CD63_MOUSE CD63 antigen OS=Mus musculus (Mouse) OX=10090 GN=Cd63 PE=1 SV=2	CD63	2	1	-0.496696	0.0117725	0.0263918	FALSE	13	12	0.00554433
Q6ZQ82	Q6ZQ82	>sp|Q6ZQ82|RHG26_MOUSE Rho GTPase-activating protein 26 OS=Mus musculus (Mouse) OX=10090 GN=Arhgap26 PE=1 SV=3	ARHGAP26	13	12	0.547507	2.9949e-09	6.40886e-08	TRUE	124	92	0.459332
Q9D7J4	Q9D7J4	>sp|Q9D7J4|COX20_MOUSE Cytochrome c oxidase assembly protein COX20, mitochondrial OS=Mus musculus (Mouse) OX=10090 GN=Cox20 PE=1 SV=1	COX20	1	1	-0.357025	0.0443778	0.0813617	FALSE	9	8	0.0808102
Q9JM63	Q9JM63	>sp|Q9JM63|KCJ10_MOUSE ATP-sensitive inward rectifier potassium channel 10 OS=Mus musculus (Mouse) OX=10090 GN=Kcnj10 PE=1 SV=1	KCNJ10	7	1	-2.07003	2.59834e-10	9.1944e-09	TRUE	26	47	-1.37891
P0C0S6;Q3THW5;Q64523;Q6GSS7	P0C0S6;Q3THW5;Q64523;Q6GSS7	>sp|P0C0S6|H2AZ_MOUSE Histone H2A.Z OS=Mus musculus (Mouse) OX=10090 GN=H2az1 PE=1 SV=2;>sp|Q3THW5|H2AV_MOUSE Histone H2A.V OS=Mus musculus (Mouse) OX=10090 GN=H2afv PE=1 SV=3;>sp|Q64523|H2A2C_MOUSE Histone H2A type 2-C OS=Mus musculus (Mouse) OX=10090 GN=Hist2h2ac PE=1 SV=3;>sp|Q6GSS7|H2A2A_MOUSE Histone H2A type 2-A OS=Mus musculus (Mouse) OX=10090 GN=Hist2h2aa1 PE=1 SV=3	H2AZ1;H2AFV;HIST2H2AC;HIST2H2AA1	1	1	0.367508	0.0308382	0.0600352	FALSE	10	8	0.266117
P59764	P59764	>sp|P59764|DOCK4_MOUSE Dedicator of cytokinesis protein 4 OS=Mus musculus (Mouse) OX=10090 GN=Dock4 PE=1 SV=1	DOCK4	21	14	0.282177	0.152729	0.232333	FALSE	178	135	0.408394
O35621	O35621	>sp|O35621|PMM1_MOUSE Phosphomannomutase 1 OS=Mus musculus (Mouse) OX=10090 GN=Pmm1 PE=1 SV=1	PMM1	9	7	-0.00733805	0.912465	0.936155	FALSE	82	64	0.359521
Q99NB8	Q99NB8	>sp|Q99NB8|UBQL4_MOUSE Ubiquilin-4 OS=Mus musculus (Mouse) OX=10090 GN=Ubqln4 PE=1 SV=1	UBQLN4	5	1	-0.746452	0.000314298	0.00109847	TRUE	33	34	-0.259724
Q04447	Q04447	>sp|Q04447|KCRB_MOUSE Creatine kinase B-type OS=Mus musculus (Mouse) OX=10090 GN=Ckb PE=1 SV=1	CKB	20	14	-0.701312	5.31163e-07	4.60852e-06	TRUE	156	137	0.117551
P62257	P62257	>sp|P62257|UBE2H_MOUSE Ubiquitin-conjugating enzyme E2 H OS=Mus musculus (Mouse) OX=10090 GN=Ube2h PE=1 SV=1	UBE2H	3	3	-0.117116	0.275479	0.376057	FALSE	29	22	0.400726
O70439	O70439	>sp|O70439|STX7_MOUSE Syntaxin-7 OS=Mus musculus (Mouse) OX=10090 GN=Stx7 PE=1 SV=3	STX7	6	5	0.195329	0.00421908	0.0106029	FALSE	57	45	0.329861
Q8BVA2	Q8BVA2	>sp|Q8BVA2|TM222_MOUSE Transmembrane protein 222 OS=Mus musculus (Mouse) OX=10090 GN=Tmem222 PE=1 SV=1	TMEM222	3	1	0.100084	0.458751	0.560816	FALSE	24	18	0.409887
Q5SVR0	Q5SVR0	>sp|Q5SVR0|TBC9B_MOUSE TBC1 domain family member 9B OS=Mus musculus (Mouse) OX=10090 GN=Tbc1d9b PE=1 SV=1	TBC1D9B	8	3	-0.183491	0.0162179	0.0349016	FALSE	56	53	-0.0666575
Q9CZ28	Q9CZ28	>sp|Q9CZ28|SNF8_MOUSE Vacuolar-sorting protein SNF8 OS=Mus musculus (Mouse) OX=10090 GN=Snf8 PE=1 SV=1	SNF8	2	2	-0.149939	0.138081	0.213653	FALSE	18	16	0.0555507
Q80VJ3	Q80VJ3	>sp|Q80VJ3|DNPH1_MOUSE 2'-deoxynucleoside 5'-phosphate N-hydrolase 1 OS=Mus musculus (Mouse) OX=10090 GN=Dnph1 PE=1 SV=2	DNPH1	2	1	-0.296358	0.0640097	0.11118	FALSE	14	10	0.490176
Q8BTY1	Q8BTY1	>sp|Q8BTY1|KAT1_MOUSE Kynurenine--oxoglutarate transaminase 1 OS=Mus musculus (Mouse) OX=10090 GN=Kyat1 PE=1 SV=1	KYAT1	5	2	-0.562298	4.56706e-05	0.000206809	TRUE	32	32	-0.155108
Q91Z67;Q91Z69	Q91Z67;Q91Z69	>sp|Q91Z67|SRGP2_MOUSE SLIT-ROBO Rho GTPase-activating protein 2 OS=Mus musculus (Mouse) OX=10090 GN=Srgap2 PE=1 SV=2;>sp|Q91Z69|SRGP1_MOUSE SLIT-ROBO Rho GTPase-activating protein 1 OS=Mus musculus (Mouse) OX=10090 GN=Srgap1 PE=1 SV=2	SRGAP2;SRGAP1	2	2	0.0669956	0.665235	0.740913	FALSE	18	14	0.340806
Q9QWR8	Q9QWR8	>sp|Q9QWR8|NAGAB_MOUSE Alpha-N-acetylgalactosaminidase OS=Mus musculus (Mouse) OX=10090 GN=Naga PE=1 SV=2	NAGA	7	5	-0.101224	0.240072	0.336287	FALSE	48	44	0.0168073
Q9DC69	Q9DC69	>sp|Q9DC69|NDUA9_MOUSE NADH dehydrogenase [ubiquinone] 1 alpha subcomplex subunit 9, mitochondrial OS=Mus musculus (Mouse) OX=10090 GN=Ndufa9 PE=1 SV=2	NDUFA9	20	18	-0.0400272	0.56043	0.652509	FALSE	185	155	0.208031
P35803	P35803	>sp|P35803|GPM6B_MOUSE Neuronal membrane glycoprotein M6-b OS=Mus musculus (Mouse) OX=10090 GN=Gpm6b PE=1 SV=2	GPM6B	8	5	-0.235776	0.0352243	0.0673827	FALSE	58	56	-0.0964337
P13020	P13020	>sp|P13020|GELS_MOUSE Gelsolin OS=Mus musculus (Mouse) OX=10090 GN=Gsn PE=1 SV=3	GSN	9	2	0.313587	0.0631342	0.109942	FALSE	50	51	-0.19383
Q80ZI6	Q80ZI6	>sp|Q80ZI6|LRSM1_MOUSE E3 ubiquitin-protein ligase LRSAM1 OS=Mus musculus (Mouse) OX=10090 GN=Lrsam1 PE=1 SV=1	LRSAM1	8	4	-0.14437	0.0334137	0.0642178	FALSE	58	54	-0.00509752
Q9JLT4	Q9JLT4	>sp|Q9JLT4|TRXR2_MOUSE Thioredoxin reductase 2, mitochondrial OS=Mus musculus (Mouse) OX=10090 GN=Txnrd2 PE=1 SV=4	TXNRD2	5	3	0.198582	0.0132299	0.0292354	FALSE	35	26	0.433549
Q8CHP6	Q8CHP6	>sp|Q8CHP6|PHC3_MOUSE Polyhomeotic-like protein 3 OS=Mus musculus (Mouse) OX=10090 GN=Phc3 PE=1 SV=2	PHC3	1	0					5	8	-1.01879
O88703;O88704	O88703;O88704	>sp|O88703|HCN2_MOUSE Potassium/sodium hyperpolarization-activated cyclic nucleotide-gated channel 2 OS=Mus musculus (Mouse) OX=10090 GN=Hcn2 PE=1 SV=1;>sp|O88704|HCN1_MOUSE Potassium/sodium hyperpolarization-activated cyclic nucleotide-gated channel 1 OS=Mus musculus (Mouse) OX=10090 GN=Hcn1 PE=1 SV=1	HCN2;HCN1	1	0					7	7	-0.145749
E9Q7G0	E9Q7G0	>sp|E9Q7G0|NUMA1_MOUSE Nuclear mitotic apparatus protein 1 OS=Mus musculus (Mouse) OX=10090 GN=Numa1 PE=1 SV=1	NUMA1	9	2	-0.0837988	0.490399	0.588827	FALSE	47	42	0.0770481
Q9EQH7	Q9EQH7	>sp|Q9EQH7|NDST3_MOUSE Bifunctional heparan sulfate N-deacetylase/N-sulfotransferase 3 OS=Mus musculus (Mouse) OX=10090 GN=Ndst3 PE=2 SV=2	NDST3	2	0					5	9	-1.23971
P03995;Q6NXH9;Q9DCV7;Q9Z2T6	P03995;Q6NXH9;Q9DCV7;Q9Z2T6	>sp|P03995|GFAP_MOUSE Glial fibrillary acidic protein OS=Mus musculus (Mouse) OX=10090 GN=Gfap PE=1 SV=4;>sp|Q6NXH9|K2C73_MOUSE Keratin, type II cytoskeletal 73 OS=Mus musculus (Mouse) OX=10090 GN=Krt73 PE=1 SV=1;>sp|Q9DCV7|K2C7_MOUSE Keratin, type II cytoskeletal 7 OS=Mus musculus (Mouse) OX=10090 GN=Krt7 PE=1 SV=1;>sp|Q9Z2T6|KRT85_MOUSE Keratin, type II cuticular Hb5 OS=Mus musculus (Mouse) OX=…	GFAP;KRT73;KRT7;KRT85	1	1	0.893065	0.366401	0.471187	FALSE	10	8	0.266117
Q91YX5	Q91YX5	>sp|Q91YX5|LGAT1_MOUSE Acyl-CoA:lysophosphatidylglycerol acyltransferase 1 OS=Mus musculus (Mouse) OX=10090 GN=Lpgat1 PE=1 SV=1	LPGAT1	2	1	-0.835183	0.000115666	0.000462493	TRUE	9	9	-0.152012
O08967;P63034;Q9QX11	O08967;P63034;Q9QX11	>sp|O08967|CYH3_MOUSE Cytohesin-3 OS=Mus musculus (Mouse) OX=10090 GN=Cyth3 PE=1 SV=1;>sp|P63034|CYH2_MOUSE Cytohesin-2 OS=Mus musculus (Mouse) OX=10090 GN=Cyth2 PE=1 SV=2;>sp|Q9QX11|CYH1_MOUSE Cytohesin-1 OS=Mus musculus (Mouse) OX=10090 GN=Cyth1 PE=1 SV=2	CYTH3;CYTH2;CYTH1	3	1	-0.615569	0.000995906	0.00299547	TRUE	17	16	-0.0436698
Q02819	Q02819	>sp|Q02819|NUCB1_MOUSE Nucleobindin-1 OS=Mus musculus (Mouse) OX=10090 GN=Nucb1 PE=1 SV=2	NUCB1	17	10	-0.704578	9.36083e-08	1.06919e-06	TRUE	135	130	-0.0851729
P0C192;Q8C031	P0C192;Q8C031	>sp|P0C192|LRC4B_MOUSE Leucine-rich repeat-containing protein 4B OS=Mus musculus (Mouse) OX=10090 GN=Lrrc4b PE=1 SV=1;>sp|Q8C031|LRC4C_MOUSE Leucine-rich repeat-containing protein 4C OS=Mus musculus (Mouse) OX=10090 GN=Lrrc4c PE=1 SV=2	LRRC4B;LRRC4C	1	0					6	8	-0.678574
Q9QXJ1	Q9QXJ1	>sp|Q9QXJ1|APBB1_MOUSE Amyloid-beta A4 precursor protein-binding family B member 1 OS=Mus musculus (Mouse) OX=10090 GN=Apbb1 PE=1 SV=3	APBB1	7	4	-0.037611	0.756876	0.81482	FALSE	49	44	0.0525886
P50516	P50516	>sp|P50516|VATA_MOUSE V-type proton ATPase catalytic subunit A OS=Mus musculus (Mouse) OX=10090 GN=Atp6v1a PE=1 SV=2	ATP6V1A	37	26	0.0219188	0.673399	0.747546	FALSE	309	262	0.186204
Q61081	Q61081	>sp|Q61081|CDC37_MOUSE Hsp90 co-chaperone Cdc37 OS=Mus musculus (Mouse) OX=10090 GN=Cdc37 PE=1 SV=1	CDC37	10	9	-0.20534	0.000949199	0.00287414	FALSE	89	77	0.141155
Q9DA03	Q9DA03	>sp|Q9DA03|LYRM7_MOUSE Complex III assembly factor LYRM7 OS=Mus musculus (Mouse) OX=10090 GN=Lyrm7 PE=3 SV=2	LYRM7	1	1	0.0350813	0.817807	0.864936	FALSE	10	8	0.266117
Q9Z0N2	Q9Z0N2	>sp|Q9Z0N2|IF2H_MOUSE Eukaryotic translation initiation factor 2 subunit 3, Y-linked OS=Mus musculus (Mouse) OX=10090 GN=Eif2s3y PE=1 SV=2	EIF2S3Y	1	1	-0.26318	0.0444134	0.0813995	FALSE	8	7	0.110269
Q920L1	Q920L1	>sp|Q920L1|FADS1_MOUSE Acyl-CoA (8-3)-desaturase OS=Mus musculus (Mouse) OX=10090 GN=Fads1 PE=1 SV=1	FADS1	7	2	-0.687123	6.82762e-07	5.66354e-06	TRUE	32	39	-0.545004
P0C0S6;Q3THW5	P0C0S6;Q3THW5	>sp|P0C0S6|H2AZ_MOUSE Histone H2A.Z OS=Mus musculus (Mouse) OX=10090 GN=H2az1 PE=1 SV=2;>sp|Q3THW5|H2AV_MOUSE Histone H2A.V OS=Mus musculus (Mouse) OX=10090 GN=H2afv PE=1 SV=3	H2AZ1;H2AFV	3	3	0.415597	0.00558144	0.0136918	FALSE	29	23	0.318629
O88487	O88487	>sp|O88487|DC1I2_MOUSE Cytoplasmic dynein 1 intermediate chain 2 OS=Mus musculus (Mouse) OX=10090 GN=Dync1i2 PE=1 SV=1	DYNC1I2	13	7	-0.294999	0.00240975	0.00649094	TRUE	97	96	-0.147341
Q9EPJ9	Q9EPJ9	>sp|Q9EPJ9|ARFG1_MOUSE ADP-ribosylation factor GTPase-activating protein 1 OS=Mus musculus (Mouse) OX=10090 GN=Arfgap1 PE=1 SV=2	ARFGAP1	12	6	-0.790508	6.7343e-08	8.10211e-07	TRUE	74	77	-0.245164
P63325	P63325	>sp|P63325|RS10_MOUSE 40S ribosomal protein S10 OS=Mus musculus (Mouse) OX=10090 GN=Rps10 PE=1 SV=1	RPS10	7	6	-0.220364	0.00745899	0.017743	FALSE	65	49	0.415301
Q3UYG8	Q3UYG8	>sp|Q3UYG8|MACD2_MOUSE ADP-ribose glycohydrolase MACROD2 OS=Mus musculus (Mouse) OX=10090 GN=Macrod2 PE=1 SV=1	MACROD2	3	1	0.114998	0.409271	0.514105	FALSE	21	20	-0.0615595
P10649;P19639	P10649;P19639	>sp|P10649|GSTM1_MOUSE Glutathione S-transferase Mu 1 OS=Mus musculus (Mouse) OX=10090 GN=Gstm1 PE=1 SV=2;>sp|P19639|GSTM3_MOUSE Glutathione S-transferase Mu 3 OS=Mus musculus (Mouse) OX=10090 GN=Gstm3 PE=1 SV=2	GSTM1;GSTM3	1	1	-2.58256	1.23125e-05	6.69275e-05	TRUE	8	8	-0.201324
Q6A0A9	Q6A0A9	>sp|Q6A0A9|F120A_MOUSE Constitutive coactivator of PPAR-gamma-like protein 1 OS=Mus musculus (Mouse) OX=10090 GN=FAM120A PE=1 SV=2	FAM120A	20	11	-0.618989	5.37258e-08	6.81198e-07	TRUE	140	146	-0.250966
P10630	P10630	>sp|P10630|IF4A2_MOUSE Eukaryotic initiation factor 4A-II OS=Mus musculus (Mouse) OX=10090 GN=Eif4a2 PE=1 SV=2	EIF4A2	9	9	-0.309706	0.00324951	0.0084136	TRUE	90	71	0.330807
Q8CCJ4	Q8CCJ4	>sp|Q8CCJ4|AMER2_MOUSE APC membrane recruitment protein 2 OS=Mus musculus (Mouse) OX=10090 GN=Amer2 PE=1 SV=2	AMER2	5	3	0.0150789	0.908998	0.933891	FALSE	41	36	0.119201
P97379;P97855	P97379;P97855	>sp|P97379|G3BP2_MOUSE Ras GTPase-activating protein-binding protein 2 OS=Mus musculus (Mouse) OX=10090 GN=G3bp2 PE=1 SV=2;>sp|P97855|G3BP1_MOUSE Ras GTPase-activating protein-binding protein 1 OS=Mus musculus (Mouse) OX=10090 GN=G3bp1 PE=1 SV=1	G3BP2;G3BP1	2	1	-0.553828	0.00453045	0.0112927	FALSE	18	13	0.513626
P68037	P68037	>sp|P68037|UB2L3_MOUSE Ubiquitin-conjugating enzyme E2 L3 OS=Mus musculus (Mouse) OX=10090 GN=Ube2l3 PE=1 SV=1	UBE2L3	6	4	-0.836033	5.16622e-10	1.57416e-08	TRUE	52	41	0.332342
Q9D8S3	Q9D8S3	>sp|Q9D8S3|ARFG3_MOUSE ADP-ribosylation factor GTPase-activating protein 3 OS=Mus musculus (Mouse) OX=10090 GN=Arfgap3 PE=1 SV=2	ARFGAP3	5	4	-0.131085	0.168945	0.252393	FALSE	40	37	0.00500153
Q61553	Q61553	>sp|Q61553|FSCN1_MOUSE Fascin OS=Mus musculus (Mouse) OX=10090 GN=Fscn1 PE=1 SV=4	FSCN1	22	17	0.160479	0.0142145	0.0311189	FALSE	190	160	0.195876
Q8VD33	Q8VD33	>sp|Q8VD33|SGTB_MOUSE Small glutamine-rich tetratricopeptide repeat-containing protein beta OS=Mus musculus (Mouse) OX=10090 GN=Sgtb PE=1 SV=1	SGTB	4	3	-0.110686	0.303646	0.405671	FALSE	33	28	0.173191
A0A1W2P7G7	A0A1W2P7G7	>tr|A0A1W2P7G7|A0A1W2P7G7_MOUSE cDNA sequence BC024063 OS=Mus musculus (Mouse) OX=10090 GN=BC024063 PE=4 SV=1	BC024063	1	0					6	8	-0.752423
P21661	P21661	>sp|P21661|NEC2_MOUSE Neuroendocrine convertase 2 OS=Mus musculus (Mouse) OX=10090 GN=Pcsk2 PE=1 SV=1	PCSK2	8	3	-1.06673	3.57004e-08	4.85633e-07	TRUE	47	48	-0.213665
Q9WTP7	Q9WTP7	>sp|Q9WTP7|KAD3_MOUSE GTP:AMP phosphotransferase AK3, mitochondrial OS=Mus musculus (Mouse) OX=10090 GN=Ak3 PE=1 SV=3	AK3	14	13	-0.0203838	0.764966	0.821568	FALSE	132	110	0.216944
Q8CFV9	Q8CFV9	>sp|Q8CFV9|RIFK_MOUSE Riboflavin kinase OS=Mus musculus (Mouse) OX=10090 GN=Rfk PE=1 SV=2	RFK	3	1	0.0235053	0.885771	0.917346	FALSE	15	16	-0.248733
Q99P72	Q99P72	>sp|Q99P72|RTN4_MOUSE Reticulon-4 OS=Mus musculus (Mouse) OX=10090 GN=Rtn4 PE=1 SV=2	RTN4	27	20	-0.325363	0.0961463	0.156818	FALSE	216	184	0.176484
Q6A065	Q6A065	>sp|Q6A065|CE170_MOUSE Centrosomal protein of 170 kDa OS=Mus musculus (Mouse) OX=10090 GN=Cep170 PE=1 SV=2	CEP170	20	11	-0.345466	0.0440983	0.0809759	FALSE	136	133	-0.116035
Q9ERK4	Q9ERK4	>sp|Q9ERK4|XPO2_MOUSE Exportin-2 OS=Mus musculus (Mouse) OX=10090 GN=Cse1l PE=1 SV=1	CSE1L	30	22	0.273462	3.00447e-05	0.00014446	TRUE	249	205	0.246285
Q99KE1	Q99KE1	>sp|Q99KE1|MAOM_MOUSE NAD-dependent malic enzyme, mitochondrial OS=Mus musculus (Mouse) OX=10090 GN=Me2 PE=1 SV=1	ME2	13	12	0.196852	0.00096418	0.00291299	FALSE	125	99	0.326045
Q99PT1	Q99PT1	>sp|Q99PT1|GDIR1_MOUSE Rho GDP-dissociation inhibitor 1 OS=Mus musculus (Mouse) OX=10090 GN=Arhgdia PE=1 SV=3	ARHGDIA	11	6	-0.231458	0.0236315	0.0479539	FALSE	86	73	0.169657
P63280	P63280	>sp|P63280|UBC9_MOUSE SUMO-conjugating enzyme UBC9 OS=Mus musculus (Mouse) OX=10090 GN=Ube2i PE=1 SV=1	UBE2I	5	4	0.0701952	0.389285	0.494507	FALSE	47	34	0.502254
P11440	P11440	>sp|P11440|CDK1_MOUSE Cyclin-dependent kinase 1 OS=Mus musculus (Mouse) OX=10090 GN=Cdk1 PE=1 SV=3	CDK1	5	3	0.559553	0.00130645	0.00378243	TRUE	41	29	0.545308
Q9QY15	Q9QY15	>sp|Q9QY15|DDX25_MOUSE ATP-dependent RNA helicase DDX25 OS=Mus musculus (Mouse) OX=10090 GN=Ddx25 PE=1 SV=2	DDX25	2	2	-0.0630989	0.463157	0.564975	FALSE	20	16	0.286542
Q6PDG5	Q6PDG5	>sp|Q6PDG5|SMRC2_MOUSE SWI/SNF complex subunit SMARCC2 OS=Mus musculus (Mouse) OX=10090 GN=Smarcc2 PE=1 SV=2	SMARCC2	11	6	-0.404201	0.000469134	0.00156013	TRUE	81	66	0.261848
Q7TNV0	Q7TNV0	>sp|Q7TNV0|DEK_MOUSE Protein DEK OS=Mus musculus (Mouse) OX=10090 GN=Dek PE=1 SV=1	DEK	7	6	-0.0263018	0.812886	0.860631	FALSE	62	50	0.287738
P62743	P62743	>sp|P62743|AP2S1_MOUSE AP-2 complex subunit sigma OS=Mus musculus (Mouse) OX=10090 GN=Ap2s1 PE=1 SV=1	AP2S1	7	7	0.0138277	0.916879	0.938903	FALSE	67	55	0.251599
Q91Z49	Q91Z49	>sp|Q91Z49|UIF_MOUSE UAP56-interacting factor OS=Mus musculus (Mouse) OX=10090 GN=Fyttd1 PE=1 SV=1	FYTTD1	1	1	-0.354602	0.0890425	0.146572	FALSE	10	8	0.266117
P08553;P46660	P08553;P46660	>sp|P08553|NFM_MOUSE Neurofilament medium polypeptide OS=Mus musculus (Mouse) OX=10090 GN=Nefm PE=1 SV=4;>sp|P46660|AINX_MOUSE Alpha-internexin OS=Mus musculus (Mouse) OX=10090 GN=Ina PE=1 SV=3	NEFM;INA	1	1	-1.85465	1.2435e-09	3.17159e-08	TRUE	8	8	-0.138417
Q8BHE3	Q8BHE3	>sp|Q8BHE3|ATCAY_MOUSE Caytaxin OS=Mus musculus (Mouse) OX=10090 GN=Atcay PE=1 SV=1	ATCAY	7	6	-0.56486	1.09434e-05	6.03334e-05	TRUE	58	52	0.0757062
Q9JLM8	Q9JLM8	>sp|Q9JLM8|DCLK1_MOUSE Serine/threonine-protein kinase DCLK1 OS=Mus musculus (Mouse) OX=10090 GN=Dclk1 PE=1 SV=1	DCLK1	25	23	0.0202561	0.780727	0.834029	FALSE	241	190	0.33779
Q3UYH7;Q99MK8	Q3UYH7;Q99MK8	>sp|Q3UYH7|ARBK2_MOUSE Beta-adrenergic receptor kinase 2 OS=Mus musculus (Mouse) OX=10090 GN=Adrbk2 PE=1 SV=2;>sp|Q99MK8|ARBK1_MOUSE Beta-adrenergic receptor kinase 1 OS=Mus musculus (Mouse) OX=10090 GN=Grk2 PE=1 SV=2	ADRBK2;GRK2	4	4	-0.876637	7.54458e-12	6.48355e-10	TRUE	39	32	0.249173
Q8BIJ6	Q8BIJ6	>sp|Q8BIJ6|SYIM_MOUSE Isoleucine--tRNA ligase, mitochondrial OS=Mus musculus (Mouse) OX=10090 GN=Iars2 PE=1 SV=1	IARS2	25	22	0.0582404	0.310708	0.412804	FALSE	235	189	0.292367
Q64433	Q64433	>sp|Q64433|CH10_MOUSE 10 kDa heat shock protein, mitochondrial OS=Mus musculus (Mouse) OX=10090 GN=Hspe1 PE=1 SV=2	HSPE1	6	6	-0.127281	0.613805	0.698432	FALSE	60	48	0.30133
Q80VL1	Q80VL1	>sp|Q80VL1|TDRKH_MOUSE Tudor and KH domain-containing protein OS=Mus musculus (Mouse) OX=10090 GN=Tdrkh PE=1 SV=1	TDRKH	16	12	0.352846	1.23053e-06	9.23516e-06	TRUE	143	108	0.420724
Q9CWK8;Q9WV80	Q9CWK8;Q9WV80	>sp|Q9CWK8|SNX2_MOUSE Sorting nexin-2 OS=Mus musculus (Mouse) OX=10090 GN=Snx2 PE=1 SV=2;>sp|Q9WV80|SNX1_MOUSE Sorting nexin-1 OS=Mus musculus (Mouse) OX=10090 GN=Snx1 PE=1 SV=1	SNX2;SNX1	2	2	-0.290284	0.00402193	0.0101609	FALSE	20	16	0.286542
O88351	O88351	>sp|O88351|IKKB_MOUSE Inhibitor of nuclear factor kappa-B kinase subunit beta OS=Mus musculus (Mouse) OX=10090 GN=Ikbkb PE=1 SV=1	IKBKB	1	0					7	8	-0.393707
Q5RJI5;Q69Z98	Q5RJI5;Q69Z98	>sp|Q5RJI5|BRSK1_MOUSE Serine/threonine-protein kinase BRSK1 OS=Mus musculus (Mouse) OX=10090 GN=Brsk1 PE=1 SV=1;>sp|Q69Z98|BRSK2_MOUSE Serine/threonine-protein kinase BRSK2 OS=Mus musculus (Mouse) OX=10090 GN=Brsk2 PE=1 SV=2	BRSK1;BRSK2	2	1	-0.163029	0.151643	0.231593	FALSE	17	14	0.234241
Q99LB6	Q99LB6	>sp|Q99LB6|MAT2B_MOUSE Methionine adenosyltransferase 2 subunit beta OS=Mus musculus (Mouse) OX=10090 GN=Mat2b PE=1 SV=1	MAT2B	8	8	-0.26635	0.0023241	0.00628504	TRUE	79	63	0.308786
P70451	P70451	>sp|P70451|FER_MOUSE Tyrosine-protein kinase Fer OS=Mus musculus (Mouse) OX=10090 GN=Fer PE=1 SV=2	FER	2	1	-0.7317	0.00050981	0.00167711	TRUE	14	16	-0.437916
Q7TNL5	Q7TNL5	>tr|Q7TNL5|Q7TNL5_MOUSE Serine/threonine-protein phosphatase 2A 56 kDa regulatory subunit OS=Mus musculus (Mouse) OX=10090 GN=Ppp2r5d PE=1 SV=1	PPP2R5D	13	10	0.0884166	0.131399	0.204542	FALSE	122	93	0.404375
Q60770	Q60770	>sp|Q60770|STXB3_MOUSE Syntaxin-binding protein 3 OS=Mus musculus (Mouse) OX=10090 GN=Stxbp3 PE=1 SV=1	STXBP3	6	0					22	30	-0.794409
Q3U4S0	Q3U4S0	>tr|Q3U4S0|Q3U4S0_MOUSE Pantothenate kinase 2 OS=Mus musculus (Mouse) OX=10090 GN=Pank2 PE=1 SV=1	PANK2	5	1	0.0600207	0.719238	0.785546	FALSE	32	29	0.0296978
P26043	P26043	>sp|P26043|RADI_MOUSE Radixin OS=Mus musculus (Mouse) OX=10090 GN=Rdx PE=1 SV=3	RDX	11	5	-0.387435	1.34448e-05	7.17853e-05	TRUE	79	81	-0.223137
Q91VM3	Q91VM3	>sp|Q91VM3|WIPI4_MOUSE WD repeat domain phosphoinositide-interacting protein 4 OS=Mus musculus (Mouse) OX=10090 GN=Wdr45 PE=1 SV=1	WDR45	2	1	0.264596	0.221868	0.316394	FALSE	16	12	0.399009
Q64105	Q64105	>sp|Q64105|SPRE_MOUSE Sepiapterin reductase OS=Mus musculus (Mouse) OX=10090 GN=Spr PE=1 SV=1	SPR	7	7	0.0955016	0.225551	0.320715	FALSE	70	56	0.302425
O89112	O89112	>sp|O89112|LANC1_MOUSE Glutathione S-transferase LANCL1 OS=Mus musculus (Mouse) OX=10090 GN=Lancl1 PE=1 SV=1	LANCL1	6	5	-0.282705	0.000843284	0.00259258	TRUE	53	43	0.265234
P58389	P58389	>sp|P58389|PTPA_MOUSE Serine/threonine-protein phosphatase 2A activator OS=Mus musculus (Mouse) OX=10090 GN=Ptpa PE=1 SV=1	PTPA	7	7	-0.125091	0.135547	0.210333	FALSE	67	54	0.277499
Q8CHX7	Q8CHX7	>sp|Q8CHX7|RFTN2_MOUSE Raftlin-2 OS=Mus musculus (Mouse) OX=10090 GN=Rftn2 PE=1 SV=3	RFTN2	5	0					12	29	-1.9126
Q8BH55	Q8BH55	>sp|Q8BH55|THNS1_MOUSE Threonine synthase-like 1 OS=Mus musculus (Mouse) OX=10090 GN=Thnsl1 PE=1 SV=1	THNSL1	12	7	0.145847	0.0429635	0.0793871	FALSE	101	77	0.398199
Q61301	Q61301	>sp|Q61301|CTNA2_MOUSE Catenin alpha-2 OS=Mus musculus (Mouse) OX=10090 GN=Ctnna2 PE=1 SV=3	CTNNA2	28	22	-0.0700179	0.179082	0.264832	FALSE	245	204	0.224641
Q3TWW8;Q8VE97	Q3TWW8;Q8VE97	>sp|Q3TWW8|SRSF6_MOUSE Serine/arginine-rich splicing factor 6 OS=Mus musculus (Mouse) OX=10090 GN=Srsf6 PE=1 SV=1;>sp|Q8VE97|SRSF4_MOUSE Serine/arginine-rich splicing factor 4 OS=Mus musculus (Mouse) OX=10090 GN=Srsf4 PE=2 SV=1	SRSF6;SRSF4	1	1	0.118491	0.69768	0.766797	FALSE	10	8	0.266117
P43006	P43006	>sp|P43006|EAA2_MOUSE Excitatory amino acid transporter 2 OS=Mus musculus (Mouse) OX=10090 GN=Slc1a2 PE=1 SV=1	SLC1A2	14	5	-0.32914	0.0561597	0.0992001	FALSE	92	95	-0.230121
O54950	O54950	>sp|O54950|AAKG1_MOUSE 5'-AMP-activated protein kinase subunit gamma-1 OS=Mus musculus (Mouse) OX=10090 GN=Prkag1 PE=1 SV=2	PRKAG1	10	2	-0.508882	4.9653e-06	3.08281e-05	TRUE	48	63	-0.726694
Q9D964	Q9D964	>sp|Q9D964|GATM_MOUSE Glycine amidinotransferase, mitochondrial OS=Mus musculus (Mouse) OX=10090 GN=Gatm PE=1 SV=1	GATM	9	3	-1.04502	2.45319e-07	2.40173e-06	TRUE	42	65	-1.05725
Q8BJY1	Q8BJY1	>sp|Q8BJY1|PSMD5_MOUSE 26S proteasome non-ATPase regulatory subunit 5 OS=Mus musculus (Mouse) OX=10090 GN=Psmd5 PE=1 SV=4	PSMD5	13	13	-0.292256	9.22527e-06	5.21898e-05	TRUE	121	100	0.228978
Q61140	Q61140	>sp|Q61140|BCAR1_MOUSE Breast cancer anti-estrogen resistance protein 1 OS=Mus musculus (Mouse) OX=10090 GN=Bcar1 PE=1 SV=2	BCAR1	9	2	-0.544983	0.00184227	0.00511751	TRUE	36	51	-0.86908
Q62393	Q62393	>sp|Q62393|TPD52_MOUSE Tumor protein D52 OS=Mus musculus (Mouse) OX=10090 GN=Tpd52 PE=1 SV=2	TPD52	5	4	-0.52489	2.04475e-05	0.000104044	TRUE	45	39	0.134033
Q9QX60	Q9QX60	>sp|Q9QX60|DGUOK_MOUSE Deoxyguanosine kinase, mitochondrial OS=Mus musculus (Mouse) OX=10090 GN=Dguok PE=1 SV=3	DGUOK	3	3	0.443329	4.72878e-05	0.000213169	TRUE	26	21	0.251736
Q9CZY3;Q9D2M8	Q9CZY3;Q9D2M8	>sp|Q9CZY3|UB2V1_MOUSE Ubiquitin-conjugating enzyme E2 variant 1 OS=Mus musculus (Mouse) OX=10090 GN=Ube2v1 PE=1 SV=1;>sp|Q9D2M8|UB2V2_MOUSE Ubiquitin-conjugating enzyme E2 variant 2 OS=Mus musculus (Mouse) OX=10090 GN=Ube2v2 PE=1 SV=4	UBE2V1;UBE2V2	5	4	-0.961307	7.95024e-12	6.62194e-10	TRUE	44	40	0.0400159
Q9JI46	Q9JI46	>sp|Q9JI46|NUDT3_MOUSE Diphosphoinositol polyphosphate phosphohydrolase 1 OS=Mus musculus (Mouse) OX=10090 GN=Nudt3 PE=1 SV=1	NUDT3	4	3	-0.20131	0.0400645	0.0748738	FALSE	31	25	0.277183
Q99K28	Q99K28	>sp|Q99K28|ARFG2_MOUSE ADP-ribosylation factor GTPase-activating protein 2 OS=Mus musculus (Mouse) OX=10090 GN=Arfgap2 PE=1 SV=1	ARFGAP2	11	6	-0.11958	0.270507	0.370311	FALSE	88	71	0.280139
Q9CQ85	Q9CQ85	>sp|Q9CQ85|TIM22_MOUSE Mitochondrial import inner membrane translocase subunit Tim22 OS=Mus musculus (Mouse) OX=10090 GN=Timm22 PE=1 SV=1	TIMM22	1	1	0.143396	0.118461	0.186873	FALSE	10	8	0.266117
Q8VD66	Q8VD66	>sp|Q8VD66|ABHD4_MOUSE (Lyso)-N-acylphosphatidylethanolamine lipase OS=Mus musculus (Mouse) OX=10090 GN=Abhd4 PE=1 SV=1	ABHD4	5	1	-0.652737	3.77861e-05	0.000175902	TRUE	23	34	-0.95135
Q91YJ3	Q91YJ3	>sp|Q91YJ3|THYN1_MOUSE Thymocyte nuclear protein 1 OS=Mus musculus (Mouse) OX=10090 GN=Thyn1 PE=1 SV=1	THYN1	5	3	0.369402	0.0126015	0.0280394	FALSE	43	34	0.317535
Q8VDJ3	Q8VDJ3	>sp|Q8VDJ3|VIGLN_MOUSE Vigilin OS=Mus musculus (Mouse) OX=10090 GN=Hdlbp PE=1 SV=1	HDLBP	36	23	-0.525202	8.52955e-08	9.95237e-07	TRUE	272	253	-0.0066726
Q9WUB4	Q9WUB4	>sp|Q9WUB4|DCTN6_MOUSE Dynactin subunit 6 OS=Mus musculus (Mouse) OX=10090 GN=Dctn6 PE=1 SV=1	DCTN6	4	2	-0.480876	0.00083638	0.00257575	TRUE	27	30	-0.372603
P11627	P11627	>sp|P11627|L1CAM_MOUSE Neural cell adhesion molecule L1 OS=Mus musculus (Mouse) OX=10090 GN=L1cam PE=1 SV=1	L1CAM	17	9	-0.728348	0.000155068	0.000593733	TRUE	118	129	-0.337837
O08553	O08553	>sp|O08553|DPYL2_MOUSE Dihydropyrimidinase-related protein 2 OS=Mus musculus (Mouse) OX=10090 GN=Dpysl2 PE=1 SV=2	DPYSL2	25	21	-0.720327	5.171e-09	9.65371e-08	TRUE	228	184	0.290306
O09159	O09159	>sp|O09159|MA2B1_MOUSE Lysosomal alpha-mannosidase OS=Mus musculus (Mouse) OX=10090 GN=Man2b1 PE=1 SV=4	MAN2B1	17	10	0.0361297	0.640665	0.720808	FALSE	126	110	0.122315
P70168	P70168	>sp|P70168|IMB1_MOUSE Importin subunit beta-1 OS=Mus musculus (Mouse) OX=10090 GN=Kpnb1 PE=1 SV=2	KPNB1	29	19	-0.053048	0.294604	0.39627	FALSE	239	202	0.191013
Q9CY52	Q9CY52	>sp|Q9CY52|THG1_MOUSE Probable tRNA(His) guanylyltransferase OS=Mus musculus (Mouse) OX=10090 GN=Thg1l PE=1 SV=1	THG1L	1	1	-0.321502	0.0039653	0.0100271	FALSE	10	8	0.266117
Q62245	Q62245	>sp|Q62245|SOS1_MOUSE Son of sevenless homolog 1 OS=Mus musculus (Mouse) OX=10090 GN=Sos1 PE=1 SV=2	SOS1	8	0					33	38	-0.444313
Q9DD02	Q9DD02	>sp|Q9DD02|HIKES_MOUSE Protein Hikeshi OS=Mus musculus (Mouse) OX=10090 GN=Hikeshi PE=1 SV=1	HIKESHI	3	3	-0.383922	0.000290998	0.00102904	TRUE	29	24	0.215695
Q3TDX8	Q3TDX8	>sp|Q3TDX8|NB5R4_MOUSE Cytochrome b5 reductase 4 OS=Mus musculus (Mouse) OX=10090 GN=Cyb5r4 PE=2 SV=3	CYB5R4	2	1	-0.329739	0.0487598	0.0880245	FALSE	10	10	-0.161643
Q8VDD8	Q8VDD8	>sp|Q8VDD8|WASH1_MOUSE WASH complex subunit 1 OS=Mus musculus (Mouse) OX=10090 GN=Washc1 PE=1 SV=1	WASHC1	4	3	-0.144637	0.164278	0.246714	FALSE	34	31	0.0226225
O35685	O35685	>sp|O35685|NUDC_MOUSE Nuclear migration protein nudC OS=Mus musculus (Mouse) OX=10090 GN=Nudc PE=1 SV=1	NUDC	18	16	-0.263832	0.000984575	0.00296963	TRUE	164	137	0.221724
P35279;P61294	P35279;P61294	>sp|P35279|RAB6A_MOUSE Ras-related protein Rab-6A OS=Mus musculus (Mouse) OX=10090 GN=Rab6a PE=1 SV=4;>sp|P61294|RAB6B_MOUSE Ras-related protein Rab-6B OS=Mus musculus (Mouse) OX=10090 GN=Rab6b PE=1 SV=1	RAB6A;RAB6B	8	5	-0.415806	4.44557e-06	2.80517e-05	TRUE	57	52	0.0396263
Q61474	Q61474	>sp|Q61474|MSI1H_MOUSE RNA-binding protein Musashi homolog 1 OS=Mus musculus (Mouse) OX=10090 GN=Msi1 PE=1 SV=1	MSI1	7	1	-0.275251	0.119624	0.188433	FALSE	35	40	-0.456548
Q3TVI8	Q3TVI8	>sp|Q3TVI8|PBIP1_MOUSE Pre-B-cell leukemia transcription factor-interacting protein 1 OS=Mus musculus (Mouse) OX=10090 GN=Pbxip1 PE=1 SV=2	PBXIP1	8	0					4	33	-4.13484
Q9QZ06	Q9QZ06	>sp|Q9QZ06|TOLIP_MOUSE Toll-interacting protein OS=Mus musculus (Mouse) OX=10090 GN=Tollip PE=1 SV=1	TOLLIP	6	5	-0.394612	0.000231999	0.000841853	TRUE	51	42	0.239847
Q80U78	Q80U78	>sp|Q80U78|PUM1_MOUSE Pumilio homolog 1 OS=Mus musculus (Mouse) OX=10090 GN=Pum1 PE=1 SV=2	PUM1	11	3	-0.0103706	0.931323	0.948982	FALSE	63	68	-0.321614
Q62383	Q62383	>sp|Q62383|SPT6H_MOUSE Transcription elongation factor SPT6 OS=Mus musculus (Mouse) OX=10090 GN=Supt6h PE=1 SV=2	SUPT6H	4	1	-0.0535815	0.86291	0.900847	FALSE	32	17	1.13855
A6ZI47	A6ZI47	>tr|A6ZI47|A6ZI47_MOUSE Fructose-bisphosphate aldolase OS=Mus musculus (Mouse) OX=10090 GN=Aldoart2 PE=1 SV=1	ALDOART2	3	1	-0.253498	0.20358	0.294544	FALSE	16	21	-0.691392
O88597	O88597	>sp|O88597|BECN1_MOUSE Beclin-1 OS=Mus musculus (Mouse) OX=10090 GN=Becn1 PE=1 SV=3	BECN1	3	1	-0.153355	0.514855	0.612475	FALSE	16	18	-0.390348
Q80U58;Q80U78	Q80U58;Q80U78	>sp|Q80U58|PUM2_MOUSE Pumilio homolog 2 OS=Mus musculus (Mouse) OX=10090 GN=Pum2 PE=1 SV=2;>sp|Q80U78|PUM1_MOUSE Pumilio homolog 1 OS=Mus musculus (Mouse) OX=10090 GN=Pum1 PE=1 SV=2	PUM2;PUM1	3	3	-0.180899	0.097026	0.157821	FALSE	28	23	0.240022
Q99020	Q99020	>sp|Q99020|ROAA_MOUSE Heterogeneous nuclear ribonucleoprotein A/B OS=Mus musculus (Mouse) OX=10090 GN=Hnrnpab PE=1 SV=1	HNRNPAB	8	8	0.0767393	0.358391	0.462064	FALSE	78	63	0.286084
Q71B07	Q71B07	>sp|Q71B07|D19L3_MOUSE Probable C-mannosyltransferase DPY19L3 OS=Mus musculus (Mouse) OX=10090 GN=Dpy19l3 PE=2 SV=2	DPY19L3	4	1	-0.135644	0.301995	0.404103	FALSE	26	23	0.0814452
A2AQ07;P68372;P99024;Q7TMM9;Q922F4;Q9CWF2	A2AQ07;P68372;P99024;Q7TMM9;Q922F4;Q9CWF2	>sp|A2AQ07|TBB1_MOUSE Tubulin beta-1 chain OS=Mus musculus (Mouse) OX=10090 GN=Tubb1 PE=1 SV=1;>sp|P68372|TBB4B_MOUSE Tubulin beta-4B chain OS=Mus musculus (Mouse) OX=10090 GN=Tubb4b PE=1 SV=1;>sp|P99024|TBB5_MOUSE Tubulin beta-5 chain OS=Mus musculus (Mouse) OX=10090 GN=Tubb5 PE=1 SV=1;>sp|Q7TMM9|TBB2A_MOUSE Tubulin beta-2A chain OS=Mus musculus (Mouse) OX=10090 GN=Tubb2a PE=1 SV=1;>sp|Q922F4|TB…	TUBB1;TUBB4B;TUBB5;TUBB2A;TUBB6;TUBB2B	1	1	-0.339579	0.00439365	0.0109872	FALSE	10	8	0.266117
E9PXF8;Q6ZPE2	E9PXF8;Q6ZPE2	>sp|E9PXF8|MTMRD_MOUSE Myotubularin-related protein 13 OS=Mus musculus (Mouse) OX=10090 GN=Sbf2 PE=1 SV=1;>sp|Q6ZPE2|MTMR5_MOUSE Myotubularin-related protein 5 OS=Mus musculus (Mouse) OX=10090 GN=Sbf1 PE=1 SV=2	SBF2;SBF1	1	1	0.537617	0.0614545	0.107397	FALSE	10	8	0.266117
Q9JK81	Q9JK81	>sp|Q9JK81|MYG1_MOUSE UPF0160 protein MYG1, mitochondrial OS=Mus musculus (Mouse) OX=10090 GN=Myg1 PE=1 SV=1	MYG1	11	9	0.168114	0.0331065	0.0636953	FALSE	100	86	0.154541
P41778	P41778	>sp|P41778|PBX1_MOUSE Pre-B-cell leukemia transcription factor 1 OS=Mus musculus (Mouse) OX=10090 GN=Pbx1 PE=1 SV=2	PBX1	3	2	-0.303396	0.213758	0.306648	FALSE	22	20	0.0619819
Q91V14;Q924N4;Q9JIS8	Q91V14;Q924N4;Q9JIS8	>sp|Q91V14|S12A5_MOUSE Solute carrier family 12 member 5 OS=Mus musculus (Mouse) OX=10090 GN=Slc12a5 PE=1 SV=2;>sp|Q924N4|S12A6_MOUSE Solute carrier family 12 member 6 OS=Mus musculus (Mouse) OX=10090 GN=Slc12a6 PE=1 SV=2;>sp|Q9JIS8|S12A4_MOUSE Solute carrier family 12 member 4 OS=Mus musculus (Mouse) OX=10090 GN=Slc12a4 PE=1 SV=2	SLC12A5;SLC12A6;SLC12A4	1	0					6	8	-0.703354
Q6IRU5	Q6IRU5	>sp|Q6IRU5|CLCB_MOUSE Clathrin light chain B OS=Mus musculus (Mouse) OX=10090 GN=Cltb PE=1 SV=1	CLTB	10	9	-0.350054	1.38034e-06	1.02093e-05	TRUE	93	74	0.309375
Q8C079	Q8C079	>sp|Q8C079|STRP1_MOUSE Striatin-interacting protein 1 OS=Mus musculus (Mouse) OX=10090 GN=Strip1 PE=1 SV=2	STRIP1	8	2	-0.160129	0.0792075	0.133094	FALSE	46	45	-0.121424
P26231;Q61301	P26231;Q61301	>sp|P26231|CTNA1_MOUSE Catenin alpha-1 OS=Mus musculus (Mouse) OX=10090 GN=Ctnna1 PE=1 SV=1;>sp|Q61301|CTNA2_MOUSE Catenin alpha-2 OS=Mus musculus (Mouse) OX=10090 GN=Ctnna2 PE=1 SV=3	CTNNA1;CTNNA2	5	3	-0.107561	0.330738	0.433668	FALSE	42	39	-0.00334494
Q3UIU2	Q3UIU2	>sp|Q3UIU2|NDUB6_MOUSE NADH dehydrogenase [ubiquinone] 1 beta subcomplex subunit 6 OS=Mus musculus (Mouse) OX=10090 GN=Ndufb6 PE=1 SV=3	NDUFB6	3	2	-0.0456622	0.798555	0.849387	FALSE	21	19	0.0344499
Q6P3D0;Q8VHN8	Q6P3D0;Q8VHN8	>sp|Q6P3D0|NUD16_MOUSE U8 snoRNA-decapping enzyme OS=Mus musculus (Mouse) OX=10090 GN=Nudt16 PE=1 SV=1;>sp|Q8VHN8|TIRR_MOUSE Tudor-interacting repair regulator protein OS=Mus musculus (Mouse) OX=10090 GN=Nudt16l1 PE=1 SV=2	NUDT16;NUDT16L1	1	1	0.474373	0.0383273	0.0721001	FALSE	10	8	0.266117
P62812;Q8BHJ7	P62812;Q8BHJ7	>sp|P62812|GBRA1_MOUSE Gamma-aminobutyric acid receptor subunit alpha-1 OS=Mus musculus (Mouse) OX=10090 GN=Gabra1 PE=1 SV=1;>sp|Q8BHJ7|GBRA5_MOUSE Gamma-aminobutyric acid receptor subunit alpha-5 OS=Mus musculus (Mouse) OX=10090 GN=Gabra5 PE=1 SV=1	GABRA1;GABRA5	1	1	-0.759223	0.000628502	0.00201106	TRUE	10	8	0.266117
Q9WVI9	Q9WVI9	>sp|Q9WVI9|JIP1_MOUSE C-Jun-amino-terminal kinase-interacting protein 1 OS=Mus musculus (Mouse) OX=10090 GN=Mapk8ip1 PE=1 SV=2	MAPK8IP1	5	0					13	28	-1.67031
Q9D3D0	Q9D3D0	>sp|Q9D3D0|TTPAL_MOUSE Alpha-tocopherol transfer protein-like OS=Mus musculus (Mouse) OX=10090 GN=Ttpal PE=1 SV=3	TTPAL	1	0					7	8	-0.38141
Q9D8B4	Q9D8B4	>sp|Q9D8B4|NDUAB_MOUSE NADH dehydrogenase [ubiquinone] 1 alpha subcomplex subunit 11 OS=Mus musculus (Mouse) OX=10090 GN=Ndufa11 PE=1 SV=2	NDUFA11	1	1	-0.195821	0.187883	0.276112	FALSE	10	8	0.266117
P63268;P68134;Q8BFZ3	P63268;P68134;Q8BFZ3	>sp|P63268|ACTH_MOUSE Actin, gamma-enteric smooth muscle OS=Mus musculus (Mouse) OX=10090 GN=Actg2 PE=1 SV=1;>sp|P68134|ACTS_MOUSE Actin, alpha skeletal muscle OS=Mus musculus (Mouse) OX=10090 GN=Acta1 PE=1 SV=1;>sp|Q8BFZ3|ACTBL_MOUSE Beta-actin-like protein 2 OS=Mus musculus (Mouse) OX=10090 GN=Actbl2 PE=1 SV=1	ACTG2;ACTA1;ACTBL2	10	5	-0.30835	0.000380717	0.00129391	TRUE	75	63	0.203872
Q9D920	Q9D920	>sp|Q9D920|BORC5_MOUSE BLOC-1-related complex subunit 5 OS=Mus musculus (Mouse) OX=10090 GN=Borcs5 PE=1 SV=1	BORCS5	2	2	-0.320107	0.0137596	0.0302577	FALSE	20	16	0.286542
Q8VHW2	Q8VHW2	>sp|Q8VHW2|CCG8_MOUSE Voltage-dependent calcium channel gamma-8 subunit OS=Mus musculus (Mouse) OX=10090 GN=Cacng8 PE=1 SV=1	CACNG8	7	1	-0.498267	0.00284098	0.00748471	TRUE	38	42	-0.383194
P47963	P47963	>sp|P47963|RL13_MOUSE 60S ribosomal protein L13 OS=Mus musculus (Mouse) OX=10090 GN=Rpl13 PE=1 SV=3	RPL13	6	5	0.97738	3.40853e-05	0.000160747	TRUE	58	45	0.361436
Q4KUS2	Q4KUS2	>sp|Q4KUS2|UN13A_MOUSE Protein unc-13 homolog A OS=Mus musculus (Mouse) OX=10090 GN=Unc13a PE=1 SV=3	UNC13A	13	5	-0.0632698	0.759241	0.816553	FALSE	82	73	0.0623909
P10605	P10605	>sp|P10605|CATB_MOUSE Cathepsin B OS=Mus musculus (Mouse) OX=10090 GN=Ctsb PE=1 SV=2	CTSB	8	4	-0.775171	5.12475e-10	1.57416e-08	TRUE	58	55	-0.0507001
E9Q743	E9Q743	>sp|E9Q743|CF251_MOUSE Cilia- and flagella-associated protein 251 OS=Mus musculus (Mouse) OX=10090 GN=Wdr66 PE=1 SV=1	WDR66	1	1	-0.0479312	0.801066	0.851556	FALSE	10	7	0.518557
O09106	O09106	>sp|O09106|HDAC1_MOUSE Histone deacetylase 1 OS=Mus musculus (Mouse) OX=10090 GN=Hdac1 PE=1 SV=1	HDAC1	4	3	0.677166	0.000179198	0.000671869	TRUE	38	25	0.685601
O35250	O35250	>sp|O35250|EXOC7_MOUSE Exocyst complex component 7 OS=Mus musculus (Mouse) OX=10090 GN=Exoc7 PE=1 SV=2	EXOC7	25	21	-0.223769	4.42201e-05	0.000201691	FALSE	228	187	0.248569
Q3UMU9	Q3UMU9	>sp|Q3UMU9|HDGR2_MOUSE Hepatoma-derived growth factor-related protein 2 OS=Mus musculus (Mouse) OX=10090 GN=Hdgfl2 PE=1 SV=1	HDGFL2	3	2	0.306232	0.0906814	0.148863	FALSE	23	16	0.560493
P62881	P62881	>sp|P62881|GNB5_MOUSE Guanine nucleotide-binding protein subunit beta-5 OS=Mus musculus (Mouse) OX=10090 GN=Gnb5 PE=1 SV=1	GNB5	5	5	-0.0973973	0.171848	0.256023	FALSE	49	40	0.256067
Q9CR95	Q9CR95	>sp|Q9CR95|NECP1_MOUSE Adaptin ear-binding coat-associated protein 1 OS=Mus musculus (Mouse) OX=10090 GN=Necap1 PE=1 SV=2	NECAP1	7	7	0.0420441	0.621936	0.704935	FALSE	67	55	0.249341
Q68FE6	Q68FE6	>sp|Q68FE6|RIPR1_MOUSE Rho family-interacting cell polarization regulator 1 OS=Mus musculus (Mouse) OX=10090 GN=Ripor1 PE=1 SV=2	RIPOR1	5	1	-1.1889	1.42047e-07	1.52891e-06	TRUE	21	27	-0.662467
P55821	P55821	>sp|P55821|STMN2_MOUSE Stathmin-2 OS=Mus musculus (Mouse) OX=10090 GN=Stmn2 PE=1 SV=1	STMN2	3	2	-0.86571	4.71258e-08	6.13315e-07	TRUE	25	18	0.497865
Q8C1B7	Q8C1B7	>sp|Q8C1B7|SEP11_MOUSE Septin-11 OS=Mus musculus (Mouse) OX=10090 GN=Septin11 PE=1 SV=4	SEPTIN11	8	8	-0.503614	6.21306e-06	3.74583e-05	TRUE	80	64	0.30325
B8ZXI1	B8ZXI1	>sp|B8ZXI1|QTRT2_MOUSE Queuine tRNA-ribosyltransferase accessory subunit 2 OS=Mus musculus (Mouse) OX=10090 GN=Qtrt2 PE=1 SV=2	QTRT2	2	1	0.362888	0.0128594	0.0285331	FALSE	17	12	0.498939
Q00612	Q00612	>sp|Q00612|G6PD1_MOUSE Glucose-6-phosphate 1-dehydrogenase X OS=Mus musculus (Mouse) OX=10090 GN=G6pdx PE=1 SV=3	G6PDX	18	11	-0.753056	3.61944e-10	1.19503e-08	TRUE	140	139	-0.130662
P35585	P35585	>sp|P35585|AP1M1_MOUSE AP-1 complex subunit mu-1 OS=Mus musculus (Mouse) OX=10090 GN=Ap1m1 PE=1 SV=3	AP1M1	16	10	-0.791528	3.37117e-12	3.7057e-10	TRUE	122	122	-0.162658
Q9CQR2	Q9CQR2	>sp|Q9CQR2|RS21_MOUSE 40S ribosomal protein S21 OS=Mus musculus (Mouse) OX=10090 GN=Rps21 PE=1 SV=1	RPS21	4	2	-0.569432	0.00615788	0.0149367	FALSE	28	29	-0.213565
Q9JII6	Q9JII6	>sp|Q9JII6|AK1A1_MOUSE Aldo-keto reductase family 1 member A1 OS=Mus musculus (Mouse) OX=10090 GN=Akr1a1 PE=1 SV=3	AKR1A1	14	12	-0.187444	0.0166555	0.0356415	FALSE	126	110	0.12478
O54916	O54916	>sp|O54916|REPS1_MOUSE RalBP1-associated Eps domain-containing protein 1 OS=Mus musculus (Mouse) OX=10090 GN=Reps1 PE=1 SV=2	REPS1	5	5	-0.146137	0.077318	0.130649	FALSE	46	37	0.278269
Q8BHW2	Q8BHW2	>sp|Q8BHW2|OSCP1_MOUSE Protein OSCP1 OS=Mus musculus (Mouse) OX=10090 GN=Oscp1 PE=1 SV=1	OSCP1	6	2	-0.369301	0.00199901	0.00549931	TRUE	40	46	-0.42792
Q3UDR8	Q3UDR8	>sp|Q3UDR8|YIPF3_MOUSE Protein YIPF3 OS=Mus musculus (Mouse) OX=10090 GN=Yipf3 PE=1 SV=1	YIPF3	2	2	0.167419	0.220198	0.314469	FALSE	19	15	0.320467
P63154	P63154	>sp|P63154|CRNL1_MOUSE Crooked neck-like protein 1 OS=Mus musculus (Mouse) OX=10090 GN=Crnkl1 PE=1 SV=1	CRNKL1	6	1	0.586144	7.05027e-05	0.000297972	TRUE	41	24	0.905746
Q811U4	Q811U4	>sp|Q811U4|MFN1_MOUSE Mitofusin-1 OS=Mus musculus (Mouse) OX=10090 GN=Mfn1 PE=1 SV=3	MFN1	4	0					17	22	-0.693657
Q99KR3	Q99KR3	>sp|Q99KR3|LACB2_MOUSE Endoribonuclease LACTB2 OS=Mus musculus (Mouse) OX=10090 GN=Lactb2 PE=1 SV=1	LACTB2	4	0					9	26	-2.2389
Q8BJW6	Q8BJW6	>sp|Q8BJW6|EIF2A_MOUSE Eukaryotic translation initiation factor 2A OS=Mus musculus (Mouse) OX=10090 GN=Eif2a PE=1 SV=2	EIF2A	12	5	-0.416242	0.000121118	0.000479688	TRUE	76	78	-0.198439
O88512	O88512	>sp|O88512|AP1G2_MOUSE AP-1 complex subunit gamma-like 2 OS=Mus musculus (Mouse) OX=10090 GN=Ap1g2 PE=1 SV=2	AP1G2	2	0					12	12	-0.175993
Q8K0G5	Q8K0G5	>sp|Q8K0G5|EIPR1_MOUSE EARP and GARP complex-interacting protein 1 OS=Mus musculus (Mouse) OX=10090 GN=Eipr1 PE=1 SV=2	EIPR1	7	4	-0.0859996	0.362985	0.467127	FALSE	54	51	-0.0440555
Q91XY5;Q91XY8	Q91XY5;Q91XY8	>tr|Q91XY5|Q91XY5_MOUSE Protocadherin gamma A3 OS=Mus musculus (Mouse) OX=10090 GN=Pcdhga3 PE=1 SV=1;>tr|Q91XY8|Q91XY8_MOUSE Protocadherin gamma A11 OS=Mus musculus (Mouse) OX=10090 GN=Pcdhga11 PE=1 SV=1	PCDHGA3;PCDHGA11	1	1	-0.273128	0.114074	0.18122	FALSE	9	8	0.0540382
Q62384	Q62384	>sp|Q62384|ZPR1_MOUSE Zinc finger protein ZPR1 OS=Mus musculus (Mouse) OX=10090 GN=Zpr1 PE=1 SV=1	ZPR1	5	1	-0.259848	0.0294802	0.0577046	FALSE	30	34	-0.406576
Q8BHZ0;Q921M7	Q8BHZ0;Q921M7	>sp|Q8BHZ0|FA49A_MOUSE Protein FAM49A OS=Mus musculus (Mouse) OX=10090 GN=Fam49a PE=1 SV=1;>sp|Q921M7|FA49B_MOUSE Protein FAM49B OS=Mus musculus (Mouse) OX=10090 GN=Fam49b PE=1 SV=1	FAM49A;FAM49B	3	2	-0.197635	0.0225388	0.0461867	FALSE	26	21	0.277013
Q8R1S0	Q8R1S0	>sp|Q8R1S0|COQ6_MOUSE Ubiquinone biosynthesis monooxygenase COQ6, mitochondrial OS=Mus musculus (Mouse) OX=10090 GN=Coq6 PE=1 SV=3	COQ6	11	7	0.533593	2.89779e-08	4.11012e-07	TRUE	103	68	0.70208
O70492	O70492	>sp|O70492|SNX3_MOUSE Sorting nexin-3 OS=Mus musculus (Mouse) OX=10090 GN=Snx3 PE=1 SV=3	SNX3	6	4	-0.330373	0.000660202	0.00209884	TRUE	51	45	0.0875619
Q8BJ05	Q8BJ05	>sp|Q8BJ05|ZC3HE_MOUSE Zinc finger CCCH domain-containing protein 14 OS=Mus musculus (Mouse) OX=10090 GN=Zc3h14 PE=1 SV=1	ZC3H14	5	0					19	24	-0.594359
P26443	P26443	>sp|P26443|DHE3_MOUSE Glutamate dehydrogenase 1, mitochondrial OS=Mus musculus (Mouse) OX=10090 GN=Glud1 PE=1 SV=1	GLUD1	29	20	-0.829609	1.76315e-12	2.32821e-10	TRUE	225	205	0.0394973
Q9D7B7	Q9D7B7	>sp|Q9D7B7|GPX8_MOUSE Probable glutathione peroxidase 8 OS=Mus musculus (Mouse) OX=10090 GN=Gpx8 PE=1 SV=1	GPX8	2	0					0	8	-4.78533
Q9Z247	Q9Z247	>sp|Q9Z247|FKBP9_MOUSE Peptidyl-prolyl cis-trans isomerase FKBP9 OS=Mus musculus (Mouse) OX=10090 GN=Fkbp9 PE=1 SV=1	FKBP9	5	0					5	24	-3.15531
P09041;P09411	P09041;P09411	>sp|P09041|PGK2_MOUSE Phosphoglycerate kinase 2 OS=Mus musculus (Mouse) OX=10090 GN=Pgk2 PE=1 SV=4;>sp|P09411|PGK1_MOUSE Phosphoglycerate kinase 1 OS=Mus musculus (Mouse) OX=10090 GN=Pgk1 PE=1 SV=4	PGK2;PGK1	6	5	-0.412081	1.41009e-05	7.4919e-05	TRUE	52	47	0.0532982
Q9WU40	Q9WU40	>sp|Q9WU40|MAN1_MOUSE Inner nuclear membrane protein Man1 OS=Mus musculus (Mouse) OX=10090 GN=Lemd3 PE=1 SV=2	LEMD3	4	1	0.249643	0.0682623	0.117736	FALSE	24	18	0.415718
Q8BFY6	Q8BFY6	>sp|Q8BFY6|PEF1_MOUSE Peflin OS=Mus musculus (Mouse) OX=10090 GN=Pef1 PE=1 SV=1	PEF1	4	1	0.186975	0.17286	0.257035	FALSE	33	25	0.401165
Q5SV85	Q5SV85	>sp|Q5SV85|SYNRG_MOUSE Synergin gamma OS=Mus musculus (Mouse) OX=10090 GN=Synrg PE=1 SV=1	SYNRG	14	4	-0.241522	0.0715758	0.122475	FALSE	99	81	0.257443
Q9WUN2	Q9WUN2	>sp|Q9WUN2|TBK1_MOUSE Serine/threonine-protein kinase TBK1 OS=Mus musculus (Mouse) OX=10090 GN=Tbk1 PE=1 SV=1	TBK1	8	2	0.162831	0.205895	0.297337	FALSE	50	41	0.240505
P15116;P39038	P15116;P39038	>sp|P15116|CADH2_MOUSE Cadherin-2 OS=Mus musculus (Mouse) OX=10090 GN=Cdh2 PE=1 SV=2;>sp|P39038|CADH4_MOUSE Cadherin-4 OS=Mus musculus (Mouse) OX=10090 GN=Cdh4 PE=2 SV=1	CDH2;CDH4	2	2	0.0108798	0.942262	0.957353	FALSE	20	16	0.286542
Q80XI4	Q80XI4	>sp|Q80XI4|PI42B_MOUSE Phosphatidylinositol 5-phosphate 4-kinase type-2 beta OS=Mus musculus (Mouse) OX=10090 GN=Pip4k2b PE=1 SV=1	PIP4K2B	15	8	-0.136715	0.0319198	0.0617193	FALSE	112	105	-0.020817
Q9CQJ6	Q9CQJ6	>sp|Q9CQJ6|DENR_MOUSE Density-regulated protein OS=Mus musculus (Mouse) OX=10090 GN=Denr PE=1 SV=1	DENR	5	4	-0.342185	0.0124338	0.0276909	FALSE	41	34	0.21687
Q8VD65	Q8VD65	>sp|Q8VD65|PI3R4_MOUSE Phosphoinositide 3-kinase regulatory subunit 4 OS=Mus musculus (Mouse) OX=10090 GN=Pik3r4 PE=1 SV=3	PIK3R4	11	6	-0.0203141	0.798278	0.849258	FALSE	81	81	-0.166458
P43406	P43406	>sp|P43406|ITAV_MOUSE Integrin alpha-V OS=Mus musculus (Mouse) OX=10090 GN=Itgav PE=1 SV=2	ITGAV	20	5	-0.850678	6.97923e-10	1.94771e-08	TRUE	94	139	-0.991729
O08908	O08908	>sp|O08908|P85B_MOUSE Phosphatidylinositol 3-kinase regulatory subunit beta OS=Mus musculus (Mouse) OX=10090 GN=Pik3r2 PE=1 SV=2	PIK3R2	3	0					14	12	0.104827
Q99NF2	Q99NF2	>sp|Q99NF2|NSMF_MOUSE NMDA receptor synaptonuclear signaling and neuronal migration factor OS=Mus musculus (Mouse) OX=10090 GN=Nsmf PE=1 SV=1	NSMF	7	3	-0.769148	3.45641e-09	7.23312e-08	TRUE	29	40	-0.80866
Q9Z1T1	Q9Z1T1	>sp|Q9Z1T1|AP3B1_MOUSE AP-3 complex subunit beta-1 OS=Mus musculus (Mouse) OX=10090 GN=Ap3b1 PE=1 SV=2	AP3B1	15	10	0.154322	0.0131888	0.0291684	FALSE	116	100	0.154363
Q2NKH9	Q2NKH9	>sp|Q2NKH9|GL6D1_MOUSE Glycosyltransferase 6 domain-containing protein 1 OS=Mus musculus (Mouse) OX=10090 GN=Glt6d1 PE=2 SV=1	GLT6D1	1	1	-0.174019	0.16381	0.246351	FALSE	10	8	0.266117
Q9Z2D1	Q9Z2D1	>sp|Q9Z2D1|MTMR2_MOUSE Myotubularin-related protein 2 OS=Mus musculus (Mouse) OX=10090 GN=Mtmr2 PE=1 SV=3	MTMR2	7	5	0.306432	0.00155417	0.00440538	TRUE	63	51	0.279143
A0A2R8VKG2	A0A2R8VKG2	>tr|A0A2R8VKG2|A0A2R8VKG2_MOUSE RIKEN cDNA D430041D05 gene OS=Mus musculus (Mouse) OX=10090 GN=D430041D05Rik PE=1 SV=1	D430041D05RIK	5	0					7	34	-3.23213
P42567	P42567	>sp|P42567|EPS15_MOUSE Epidermal growth factor receptor substrate 15 OS=Mus musculus (Mouse) OX=10090 GN=Eps15 PE=1 SV=1	EPS15	12	5	-0.262298	0.00554838	0.0136169	FALSE	70	76	-0.329584
Q91W82	Q91W82	>sp|Q91W82|UB2E2_MOUSE Ubiquitin-conjugating enzyme E2 E2 OS=Mus musculus (Mouse) OX=10090 GN=Ube2e2 PE=2 SV=1	UBE2E2	3	2	0.334273	0.00818184	0.0191594	FALSE	27	18	0.647591
P18242	P18242	>sp|P18242|CATD_MOUSE Cathepsin D OS=Mus musculus (Mouse) OX=10090 GN=Ctsd PE=1 SV=1	CTSD	14	12	-0.705621	1.18465e-10	4.75089e-09	TRUE	123	105	0.178184
P51859	P51859	>sp|P51859|HDGF_MOUSE Hepatoma-derived growth factor OS=Mus musculus (Mouse) OX=10090 GN=Hdgf PE=1 SV=2	HDGF	7	4	-0.363137	0.000324415	0.00113169	TRUE	46	44	-0.0618704
Q6KAR6	Q6KAR6	>sp|Q6KAR6|EXOC3_MOUSE Exocyst complex component 3 OS=Mus musculus (Mouse) OX=10090 GN=Exoc3 PE=1 SV=2	EXOC3	16	10	-0.113806	0.0455992	0.0832346	FALSE	133	111	0.214654
P56380	P56380	>sp|P56380|AP4A_MOUSE Bis(5'-nucleosyl)-tetraphosphatase [asymmetrical] OS=Mus musculus (Mouse) OX=10090 GN=Nudt2 PE=1 SV=3	NUDT2	5	5	0.0432445	0.521238	0.618179	FALSE	46	37	0.288185
Q3U2I3	Q3U2I3	>sp|Q3U2I3|F16A2_MOUSE FTS and Hook-interacting protein OS=Mus musculus (Mouse) OX=10090 GN=Fam160a2 PE=1 SV=2	FAM160A2	6	2	0.0752991	0.392333	0.497795	FALSE	45	39	0.141542
Q8BVF7	Q8BVF7	>sp|Q8BVF7|APH1A_MOUSE Gamma-secretase subunit APH-1A OS=Mus musculus (Mouse) OX=10090 GN=Aph1a PE=1 SV=2	APH1A	1	1	-0.329463	0.0750092	0.127344	FALSE	10	8	0.266117
P02301;P68433;P84228;P84244	P02301;P68433;P84228;P84244	>sp|P02301|H3C_MOUSE Histone H3.3C OS=Mus musculus (Mouse) OX=10090 GN=H3f3c PE=3 SV=3;>sp|P68433|H31_MOUSE Histone H3.1 OS=Mus musculus (Mouse) OX=10090 GN=H3c1 PE=1 SV=2;>sp|P84228|H32_MOUSE Histone H3.2 OS=Mus musculus (Mouse) OX=10090 GN=Hist2h3c2 PE=1 SV=2;>sp|P84244|H33_MOUSE Histone H3.3 OS=Mus musculus (Mouse) OX=10090 GN=H3-3b PE=1 SV=2	H3F3C;H3C1;HIST2H3C2;H3-3B	5	3	0.498228	0.00898259	0.020863	FALSE	42	33	0.329362
Q91WD5	Q91WD5	>sp|Q91WD5|NDUS2_MOUSE NADH dehydrogenase [ubiquinone] iron-sulfur protein 2, mitochondrial OS=Mus musculus (Mouse) OX=10090 GN=Ndufs2 PE=1 SV=1	NDUFS2	25	17	-0.0904316	0.118101	0.186523	FALSE	205	172	0.201318
P62264	P62264	>sp|P62264|RS14_MOUSE 40S ribosomal protein S14 OS=Mus musculus (Mouse) OX=10090 GN=Rps14 PE=1 SV=3	RPS14	9	6	0.338838	0.000307225	0.00107658	TRUE	77	58	0.433395
O70480	O70480	>sp|O70480|VAMP4_MOUSE Vesicle-associated membrane protein 4 OS=Mus musculus (Mouse) OX=10090 GN=Vamp4 PE=1 SV=1	VAMP4	3	3	0.388543	0.000160889	0.000612697	TRUE	30	24	0.293811
O88485;O88487	O88485;O88487	>sp|O88485|DC1I1_MOUSE Cytoplasmic dynein 1 intermediate chain 1 OS=Mus musculus (Mouse) OX=10090 GN=Dync1i1 PE=1 SV=2;>sp|O88487|DC1I2_MOUSE Cytoplasmic dynein 1 intermediate chain 2 OS=Mus musculus (Mouse) OX=10090 GN=Dync1i2 PE=1 SV=1	DYNC1I1;DYNC1I2	1	1	-0.138224	0.449912	0.552216	FALSE	9	6	0.562206
P50544	P50544	>sp|P50544|ACADV_MOUSE Very long-chain specific acyl-CoA dehydrogenase, mitochondrial OS=Mus musculus (Mouse) OX=10090 GN=Acadvl PE=1 SV=3	ACADVL	27	24	0.0029221	0.963638	0.973528	FALSE	251	206	0.261067
P35276;P63011	P35276;P63011	>sp|P35276|RAB3D_MOUSE Ras-related protein Rab-3D OS=Mus musculus (Mouse) OX=10090 GN=Rab3d PE=1 SV=1;>sp|P63011|RAB3A_MOUSE Ras-related protein Rab-3A OS=Mus musculus (Mouse) OX=10090 GN=Rab3a PE=1 SV=1	RAB3D;RAB3A	1	1	0.0792726	0.63764	0.718307	FALSE	10	8	0.266117
Q61207	Q61207	>sp|Q61207|SAP_MOUSE Prosaposin OS=Mus musculus (Mouse) OX=10090 GN=Psap PE=1 SV=2	PSAP	8	5	-1.10819	4.90536e-05	0.00022003	TRUE	71	60	0.199793
Q3USJ8	Q3USJ8	>sp|Q3USJ8|FCSD2_MOUSE F-BAR and double SH3 domains protein 2 OS=Mus musculus (Mouse) OX=10090 GN=Fchsd2 PE=1 SV=2	FCHSD2	6	1	-0.305734	0.192918	0.281857	FALSE	23	32	-0.821948
Q9CSU0	Q9CSU0	>sp|Q9CSU0|RPR1B_MOUSE Regulation of nuclear pre-mRNA domain-containing protein 1B OS=Mus musculus (Mouse) OX=10090 GN=Rprd1b PE=1 SV=2	RPRD1B	5	0					18	25	-0.8002
P0C192;Q8C031;Q99PH1	P0C192;Q8C031;Q99PH1	>sp|P0C192|LRC4B_MOUSE Leucine-rich repeat-containing protein 4B OS=Mus musculus (Mouse) OX=10090 GN=Lrrc4b PE=1 SV=1;>sp|Q8C031|LRC4C_MOUSE Leucine-rich repeat-containing protein 4C OS=Mus musculus (Mouse) OX=10090 GN=Lrrc4c PE=1 SV=2;>sp|Q99PH1|LRRC4_MOUSE Leucine-rich repeat-containing protein 4 OS=Mus musculus (Mouse) OX=10090 GN=Lrrc4 PE=1 SV=2	LRRC4B;LRRC4C;LRRC4	1	1	-0.786378	1.71132e-05	8.90605e-05	TRUE	10	8	0.266117
O35382	O35382	>sp|O35382|EXOC4_MOUSE Exocyst complex component 4 OS=Mus musculus (Mouse) OX=10090 GN=Exoc4 PE=1 SV=2	EXOC4	30	22	-0.259109	5.52702e-06	3.38116e-05	TRUE	239	203	0.18033
P46660	P46660	>sp|P46660|AINX_MOUSE Alpha-internexin OS=Mus musculus (Mouse) OX=10090 GN=Ina PE=1 SV=3	INA	26	15	-2.56155	9.54348e-15	7.3812e-12	TRUE	178	195	-0.331474
Q64012	Q64012	>sp|Q64012|RALY_MOUSE RNA-binding protein Raly OS=Mus musculus (Mouse) OX=10090 GN=Raly PE=1 SV=3	RALY	6	6	0.122541	0.191484	0.280264	FALSE	57	46	0.283853
Q91YR1	Q91YR1	>sp|Q91YR1|TWF1_MOUSE Twinfilin-1 OS=Mus musculus (Mouse) OX=10090 GN=Twf1 PE=1 SV=2	TWF1	12	7	-0.520175	8.68244e-08	1.00873e-06	TRUE	92	89	-0.0910348
P35279	P35279	>sp|P35279|RAB6A_MOUSE Ras-related protein Rab-6A OS=Mus musculus (Mouse) OX=10090 GN=Rab6a PE=1 SV=4	RAB6A	9	6	-0.576245	6.11659e-07	5.14211e-06	TRUE	71	64	0.0506306
Q62167	Q62167	>sp|Q62167|DDX3X_MOUSE ATP-dependent RNA helicase DDX3X OS=Mus musculus (Mouse) OX=10090 GN=Ddx3x PE=1 SV=3	DDX3X	5	4	-0.440292	0.00289244	0.00760178	TRUE	41	38	-0.0120693
Q3UHN9	Q3UHN9	>sp|Q3UHN9|NDST1_MOUSE Bifunctional heparan sulfate N-deacetylase/N-sulfotransferase 1 OS=Mus musculus (Mouse) OX=10090 GN=Ndst1 PE=1 SV=2	NDST1	3	1	-0.682566	6.20514e-05	0.0002679	TRUE	14	16	-0.428417
O35598	O35598	>sp|O35598|ADA10_MOUSE Disintegrin and metalloproteinase domain-containing protein 10 OS=Mus musculus (Mouse) OX=10090 GN=Adam10 PE=1 SV=2	ADAM10	5	3	-0.292345	0.00385123	0.00977524	TRUE	39	37	-0.0383288
Q3TLS3	Q3TLS3	>sp|Q3TLS3|GDPP1_MOUSE GDP-D-glucose phosphorylase 1 OS=Mus musculus (Mouse) OX=10090 GN=Gdpgp1 PE=1 SV=2	GDPGP1	4	0					12	18	-0.924914
Q9CQC7	Q9CQC7	>sp|Q9CQC7|NDUB4_MOUSE NADH dehydrogenase [ubiquinone] 1 beta subcomplex subunit 4 OS=Mus musculus (Mouse) OX=10090 GN=Ndufb4 PE=1 SV=3	NDUFB4	7	6	-0.023783	0.733705	0.797006	FALSE	69	52	0.428429
Q99MN9	Q99MN9	>sp|Q99MN9|PCCB_MOUSE Propionyl-CoA carboxylase beta chain, mitochondrial OS=Mus musculus (Mouse) OX=10090 GN=Pccb PE=1 SV=2	PCCB	20	15	-0.291739	2.20184e-05	0.000110994	TRUE	164	144	0.111693
Q8R1K1	Q8R1K1	>sp|Q8R1K1|UBAC2_MOUSE Ubiquitin-associated domain-containing protein 2 OS=Mus musculus (Mouse) OX=10090 GN=Ubac2 PE=1 SV=1	UBAC2	5	0					12	28	-1.84591
O88990;P57780;Q7TPR4;Q9JI91	O88990;P57780;Q7TPR4;Q9JI91	>sp|O88990|ACTN3_MOUSE Alpha-actinin-3 OS=Mus musculus (Mouse) OX=10090 GN=Actn3 PE=2 SV=1;>sp|P57780|ACTN4_MOUSE Alpha-actinin-4 OS=Mus musculus (Mouse) OX=10090 GN=Actn4 PE=1 SV=1;>sp|Q7TPR4|ACTN1_MOUSE Alpha-actinin-1 OS=Mus musculus (Mouse) OX=10090 GN=Actn1 PE=1 SV=1;>sp|Q9JI91|ACTN2_MOUSE Alpha-actinin-2 OS=Mus musculus (Mouse) OX=10090 GN=Actn2 PE=1 SV=2	ACTN3;ACTN4;ACTN1;ACTN2	5	4	-0.881836	8.8912e-07	7.0582e-06	TRUE	45	40	0.0840914
P14824	P14824	>sp|P14824|ANXA6_MOUSE Annexin A6 OS=Mus musculus (Mouse) OX=10090 GN=Anxa6 PE=1 SV=3	ANXA6	34	26	-0.685374	2.41089e-09	5.34824e-08	TRUE	291	255	0.119821
Q68FH4	Q68FH4	>sp|Q68FH4|GALK2_MOUSE N-acetylgalactosamine kinase OS=Mus musculus (Mouse) OX=10090 GN=Galk2 PE=1 SV=1	GALK2	2	1	-0.337908	0.0420298	0.0779545	FALSE	16	14	0.112159
P63005	P63005	>sp|P63005|LIS1_MOUSE Platelet-activating factor acetylhydrolase IB subunit alpha OS=Mus musculus (Mouse) OX=10090 GN=Pafah1b1 PE=1 SV=2	PAFAH1B1	18	13	-0.409023	5.07772e-07	4.44116e-06	TRUE	152	133	0.124408
Q7TNE3	Q7TNE3	>sp|Q7TNE3|SPAG7_MOUSE Sperm-associated antigen 7 OS=Mus musculus (Mouse) OX=10090 GN=Spag7 PE=1 SV=1	SPAG7	2	1	0.0378882	0.828875	0.87374	FALSE	17	10	0.889459
Q05512	Q05512	>sp|Q05512|MARK2_MOUSE Serine/threonine-protein kinase MARK2 OS=Mus musculus (Mouse) OX=10090 GN=Mark2 PE=1 SV=3	MARK2	16	12	-0.00174115	0.979739	0.985065	FALSE	137	114	0.225955
P98203	P98203	>sp|P98203|ARVC_MOUSE Armadillo repeat protein deleted in velo-cardio-facial syndrome homolog OS=Mus musculus (Mouse) OX=10090 GN=Arvcf PE=1 SV=2	ARVCF	11	5	0.176675	0.118496	0.186874	FALSE	81	61	0.425103
P54754;Q03137;Q62413;Q8CBF3	P54754;Q03137;Q62413;Q8CBF3	>sp|P54754|EPHB3_MOUSE Ephrin type-B receptor 3 OS=Mus musculus (Mouse) OX=10090 GN=Ephb3 PE=1 SV=2;>sp|Q03137|EPHA4_MOUSE Ephrin type-A receptor 4 OS=Mus musculus (Mouse) OX=10090 GN=Epha4 PE=1 SV=2;>sp|Q62413|EPHA6_MOUSE Ephrin type-A receptor 6 OS=Mus musculus (Mouse) OX=10090 GN=Epha6 PE=1 SV=2;>sp|Q8CBF3|EPHB1_MOUSE Ephrin type-B receptor 1 OS=Mus musculus (Mouse) OX=10090 GN=Ephb1 PE=1 SV=1	EPHB3;EPHA4;EPHA6;EPHB1	1	1	-0.655323	0.00206238	0.00564905	TRUE	10	8	0.266117
E9Q912	E9Q912	>tr|E9Q912|E9Q912_MOUSE RAP1, GTP-GDP dissociation stimulator 1 OS=Mus musculus (Mouse) OX=10090 GN=Rap1gds1 PE=1 SV=1	RAP1GDS1	18	17	-0.913396	3.36667e-11	1.88486e-09	TRUE	170	138	0.27624
P32883	P32883	>sp|P32883|RASK_MOUSE GTPase KRas OS=Mus musculus (Mouse) OX=10090 GN=Kras PE=1 SV=1	KRAS	3	2	-0.0694048	0.428339	0.532742	FALSE	26	20	0.359645
Q9EQH3	Q9EQH3	>sp|Q9EQH3|VPS35_MOUSE Vacuolar protein sorting-associated protein 35 OS=Mus musculus (Mouse) OX=10090 GN=Vps35 PE=1 SV=1	VPS35	28	21	-0.213312	8.64226e-06	4.94078e-05	FALSE	243	208	0.162896
P83510	P83510	>sp|P83510|TNIK_MOUSE Traf2 and NCK-interacting protein kinase OS=Mus musculus (Mouse) OX=10090 GN=Tnik PE=1 SV=2	TNIK	13	10	-0.418368	0.000226056	0.000823599	TRUE	110	99	0.0573403
Q9CQF6	Q9CQF6	>sp|Q9CQF6|ADPPT_MOUSE L-aminoadipate-semialdehyde dehydrogenase-phosphopantetheinyl transferase OS=Mus musculus (Mouse) OX=10090 GN=Aasdhppt PE=1 SV=1	AASDHPPT	3	0					25	16	0.73763
Q3TKT4;Q6DIC0	Q3TKT4;Q6DIC0	>sp|Q3TKT4|SMCA4_MOUSE Transcription activator BRG1 OS=Mus musculus (Mouse) OX=10090 GN=Smarca4 PE=1 SV=1;>sp|Q6DIC0|SMCA2_MOUSE Probable global transcription activator SNF2L2 OS=Mus musculus (Mouse) OX=10090 GN=Smarca2 PE=1 SV=1	SMARCA4;SMARCA2	6	5	0.0228831	0.838966	0.881973	FALSE	53	38	0.512839
G5E829;Q6Q477	G5E829;Q6Q477	>sp|G5E829|AT2B1_MOUSE Plasma membrane calcium-transporting ATPase 1 OS=Mus musculus (Mouse) OX=10090 GN=Atp2b1 PE=1 SV=1;>sp|Q6Q477|AT2B4_MOUSE Plasma membrane calcium-transporting ATPase 4 OS=Mus musculus (Mouse) OX=10090 GN=Atp2b4 PE=1 SV=1	ATP2B1;ATP2B4	4	4	0.00657301	0.938395	0.954437	FALSE	40	32	0.297538
P70279	P70279	>sp|P70279|SURF6_MOUSE Surfeit locus protein 6 OS=Mus musculus (Mouse) OX=10090 GN=Surf6 PE=1 SV=1	SURF6	1	1	0.173083	0.0909211	0.149159	FALSE	9	8	0.0717842
Q9D024	Q9D024	>sp|Q9D024|CCD47_MOUSE Coiled-coil domain-containing protein 47 OS=Mus musculus (Mouse) OX=10090 GN=Ccdc47 PE=1 SV=2	CCDC47	11	6	-0.238269	0.00628431	0.0152093	FALSE	82	72	0.10784
O88271	O88271	>sp|O88271|CFDP1_MOUSE Craniofacial development protein 1 OS=Mus musculus (Mouse) OX=10090 GN=Cfdp1 PE=1 SV=1	CFDP1	2	2	0.478527	0.0033083	0.00855197	TRUE	20	15	0.422325
Q64522	Q64522	>sp|Q64522|H2A2B_MOUSE Histone H2A type 2-B OS=Mus musculus (Mouse) OX=10090 GN=Hist2h2ab PE=1 SV=3	HIST2H2AB	3	1	0.370742	0.0494371	0.0890691	FALSE	21	17	0.259055
P15626;Q80W21	P15626;Q80W21	>sp|P15626|GSTM2_MOUSE Glutathione S-transferase Mu 2 OS=Mus musculus (Mouse) OX=10090 GN=Gstm2 PE=1 SV=2;>sp|Q80W21|GSTM7_MOUSE Glutathione S-transferase Mu 7 OS=Mus musculus (Mouse) OX=10090 GN=Gstm7 PE=1 SV=1	GSTM2;GSTM7	1	0					3	8	-1.85194
O08585	O08585	>sp|O08585|CLCA_MOUSE Clathrin light chain A OS=Mus musculus (Mouse) OX=10090 GN=Clta PE=1 SV=2	CLTA	5	4	-0.2799	0.000301909	0.00106001	TRUE	46	35	0.401203
P70206;P70208	P70206;P70208	>sp|P70206|PLXA1_MOUSE Plexin-A1 OS=Mus musculus (Mouse) OX=10090 GN=Plxna1 PE=1 SV=1;>sp|P70208|PLXA3_MOUSE Plexin-A3 OS=Mus musculus (Mouse) OX=10090 GN=Plxna3 PE=1 SV=2	PLXNA1;PLXNA3	2	1	0.020612	0.944454	0.95808	FALSE	15	11	0.451153
Q0VE82	Q0VE82	>sp|Q0VE82|CPNE7_MOUSE Copine-7 OS=Mus musculus (Mouse) OX=10090 GN=Cpne7 PE=1 SV=1	CPNE7	12	7	-0.667041	2.49678e-05	0.000124014	TRUE	88	92	-0.259737
Q99NE5	Q99NE5	>sp|Q99NE5|RIMS1_MOUSE Regulating synaptic membrane exocytosis protein 1 OS=Mus musculus (Mouse) OX=10090 GN=Rims1 PE=1 SV=2	RIMS1	19	4	-0.70397	4.49121e-05	0.000204331	TRUE	107	125	-0.494696
Q8C754	Q8C754	>sp|Q8C754|VPS52_MOUSE Vacuolar protein sorting-associated protein 52 homolog OS=Mus musculus (Mouse) OX=10090 GN=Vps52 PE=1 SV=1	VPS52	22	16	0.0121865	0.804573	0.854109	FALSE	184	149	0.272935
P62830	P62830	>sp|P62830|RL23_MOUSE 60S ribosomal protein L23 OS=Mus musculus (Mouse) OX=10090 GN=Rpl23 PE=1 SV=1	RPL23	4	4	0.0902685	0.497805	0.596397	FALSE	40	32	0.297538
P54797	P54797	>sp|P54797|TNG2_MOUSE Transport and Golgi organization 2 homolog OS=Mus musculus (Mouse) OX=10090 GN=Tango2 PE=1 SV=1	TANGO2	3	2	-0.254918	0.134153	0.208409	FALSE	24	22	0.0106211
P49586;Q811Q9	P49586;Q811Q9	>sp|P49586|PCY1A_MOUSE Choline-phosphate cytidylyltransferase A OS=Mus musculus (Mouse) OX=10090 GN=Pcyt1a PE=1 SV=1;>sp|Q811Q9|PCY1B_MOUSE Choline-phosphate cytidylyltransferase B OS=Mus musculus (Mouse) OX=10090 GN=Pcyt1b PE=1 SV=2	PCYT1A;PCYT1B	4	3	-0.0698268	0.496069	0.594769	FALSE	36	29	0.271125
A2APV2	A2APV2	>sp|A2APV2|FMNL2_MOUSE Formin-like protein 2 OS=Mus musculus (Mouse) OX=10090 GN=Fmnl2 PE=1 SV=2	FMNL2	10	2	-0.222903	0.0255419	0.0511595	FALSE	55	54	-0.117151
Q01063	Q01063	>sp|Q01063|PDE4D_MOUSE cAMP-specific 3',5'-cyclic phosphodiesterase 4D OS=Mus musculus (Mouse) OX=10090 GN=Pde4d PE=1 SV=2	PDE4D	5	2	-0.647328	5.88444e-06	3.56756e-05	TRUE	37	37	-0.158392
Q8CC21	Q8CC21	>sp|Q8CC21|TTC19_MOUSE Tetratricopeptide repeat protein 19, mitochondrial OS=Mus musculus (Mouse) OX=10090 GN=Ttc19 PE=1 SV=1	TTC19	7	5	-0.222316	0.045216	0.0827585	FALSE	55	47	0.162382
Q8R127	Q8R127	>sp|Q8R127|SCPDL_MOUSE Saccharopine dehydrogenase-like oxidoreductase OS=Mus musculus (Mouse) OX=10090 GN=Sccpdh PE=1 SV=1	SCCPDH	8	7	0.379271	0.000253783	0.00091344	TRUE	73	63	0.14302
Q9JJU8	Q9JJU8	>sp|Q9JJU8|SH3L1_MOUSE SH3 domain-binding glutamic acid-rich-like protein OS=Mus musculus (Mouse) OX=10090 GN=Sh3bgrl PE=1 SV=1	SH3BGRL	6	3	-1.18474	4.27536e-11	2.31468e-09	TRUE	33	42	-0.641926
Q8JZK9	Q8JZK9	>sp|Q8JZK9|HMCS1_MOUSE Hydroxymethylglutaryl-CoA synthase, cytoplasmic OS=Mus musculus (Mouse) OX=10090 GN=Hmgcs1 PE=1 SV=1	HMGCS1	12	9	-0.583988	1.06196e-06	8.1901e-06	TRUE	100	89	0.0828818
Q6PA06;Q8BH66	Q6PA06;Q8BH66	>sp|Q6PA06|ATLA2_MOUSE Atlastin-2 OS=Mus musculus (Mouse) OX=10090 GN=Atl2 PE=1 SV=1;>sp|Q8BH66|ATLA1_MOUSE Atlastin-1 OS=Mus musculus (Mouse) OX=10090 GN=Atl1 PE=1 SV=1	ATL2;ATL1	1	1	-0.912213	4.93932e-06	3.07074e-05	TRUE	8	8	-0.145185
Q9CRB0	Q9CRB0	>sp|Q9CRB0|SNX24_MOUSE Sorting nexin-24 OS=Mus musculus (Mouse) OX=10090 GN=Snx24 PE=1 SV=1	SNX24	1	1	0.0291879	0.874558	0.908725	FALSE	10	8	0.266117
Q9DC63	Q9DC63	>sp|Q9DC63|FBX3_MOUSE F-box only protein 3 OS=Mus musculus (Mouse) OX=10090 GN=Fbxo3 PE=1 SV=1	FBXO3	4	2	-0.29048	0.0098777	0.0227179	FALSE	24	25	-0.246493
Q6ZPE2;Q9Z2D1	Q6ZPE2;Q9Z2D1	>sp|Q6ZPE2|MTMR5_MOUSE Myotubularin-related protein 5 OS=Mus musculus (Mouse) OX=10090 GN=Sbf1 PE=1 SV=2;>sp|Q9Z2D1|MTMR2_MOUSE Myotubularin-related protein 2 OS=Mus musculus (Mouse) OX=10090 GN=Mtmr2 PE=1 SV=3	SBF1;MTMR2	1	1	0.425424	0.00892476	0.0207376	FALSE	10	8	0.266117
Q8CI94;Q9ET01;Q9WUB3	Q8CI94;Q9ET01;Q9WUB3	>sp|Q8CI94|PYGB_MOUSE Glycogen phosphorylase, brain form OS=Mus musculus (Mouse) OX=10090 GN=Pygb PE=1 SV=3;>sp|Q9ET01|PYGL_MOUSE Glycogen phosphorylase, liver form OS=Mus musculus (Mouse) OX=10090 GN=Pygl PE=1 SV=4;>sp|Q9WUB3|PYGM_MOUSE Glycogen phosphorylase, muscle form OS=Mus musculus (Mouse) OX=10090 GN=Pygm PE=1 SV=3	PYGB;PYGL;PYGM	4	3	-0.630568	3.23715e-08	4.52867e-07	TRUE	31	31	-0.160067
P63147	P63147	>sp|P63147|UBE2B_MOUSE Ubiquitin-conjugating enzyme E2 B OS=Mus musculus (Mouse) OX=10090 GN=Ube2b PE=1 SV=1	UBE2B	2	1	-0.328752	0.0543655	0.0966299	FALSE	16	16	-0.171216
P48031	P48031	>sp|P48031|GBX2_MOUSE Homeobox protein GBX-2 OS=Mus musculus (Mouse) OX=10090 GN=Gbx2 PE=2 SV=1	GBX2	1	1	-0.657625	0.000769502	0.00240397	TRUE	8	6	0.378667
Q80TR4;Q9R1B9	Q80TR4;Q9R1B9	>sp|Q80TR4|SLIT1_MOUSE Slit homolog 1 protein OS=Mus musculus (Mouse) OX=10090 GN=Slit1 PE=1 SV=2;>sp|Q9R1B9|SLIT2_MOUSE Slit homolog 2 protein OS=Mus musculus (Mouse) OX=10090 GN=Slit2 PE=2 SV=2	SLIT1;SLIT2	1	1	0.971744	0.000120026	0.000476058	TRUE	10	8	0.266117
Q80U28	Q80U28	>sp|Q80U28|MADD_MOUSE MAP kinase-activating death domain protein OS=Mus musculus (Mouse) OX=10090 GN=Madd PE=1 SV=2	MADD	25	12	0.425708	0.0467956	0.0850173	FALSE	208	139	0.659818
Q9ERV1	Q9ERV1	>sp|Q9ERV1|MKRN2_MOUSE Probable E3 ubiquitin-protein ligase makorin-2 OS=Mus musculus (Mouse) OX=10090 GN=Mkrn2 PE=1 SV=2	MKRN2	1	1	0.0118873	0.923073	0.943279	FALSE	9	7	0.306478
P09411	P09411	>sp|P09411|PGK1_MOUSE Phosphoglycerate kinase 1 OS=Mus musculus (Mouse) OX=10090 GN=Pgk1 PE=1 SV=4	PGK1	19	10	-0.380949	2.54963e-05	0.000126176	TRUE	123	114	0.00889928
Q60631	Q60631	>sp|Q60631|GRB2_MOUSE Growth factor receptor-bound protein 2 OS=Mus musculus (Mouse) OX=10090 GN=Grb2 PE=1 SV=1	GRB2	10	9	-0.378571	0.000102396	0.000415594	TRUE	90	76	0.196997
P62331	P62331	>sp|P62331|ARF6_MOUSE ADP-ribosylation factor 6 OS=Mus musculus (Mouse) OX=10090 GN=Arf6 PE=1 SV=2	ARF6	6	5	0.311379	5.61306e-05	0.000246265	TRUE	53	41	0.365034
Q922J3	Q922J3	>sp|Q922J3|CLIP1_MOUSE CAP-Gly domain-containing linker protein 1 OS=Mus musculus (Mouse) OX=10090 GN=Clip1 PE=1 SV=1	CLIP1	29	21	-0.29039	0.00331085	0.00855197	TRUE	222	201	0.0484516
P70232	P70232	>sp|P70232|NCHL1_MOUSE Neural cell adhesion molecule L1-like protein OS=Mus musculus (Mouse) OX=10090 GN=Chl1 PE=1 SV=2	CHL1	15	8	-0.225118	0.0315295	0.0612049	FALSE	112	109	-0.10244
Q5SWU9	Q5SWU9	>sp|Q5SWU9|ACACA_MOUSE Acetyl-CoA carboxylase 1 OS=Mus musculus (Mouse) OX=10090 GN=Acaca PE=1 SV=1	ACACA	28	8	-0.0847151	0.714845	0.781853	FALSE	170	142	0.225146
Q7TPD0	Q7TPD0	>sp|Q7TPD0|INT3_MOUSE Integrator complex subunit 3 OS=Mus musculus (Mouse) OX=10090 GN=Ints3 PE=1 SV=2	INTS3	7	0					38	36	-0.0473699
Q5RJI5	Q5RJI5	>sp|Q5RJI5|BRSK1_MOUSE Serine/threonine-protein kinase BRSK1 OS=Mus musculus (Mouse) OX=10090 GN=Brsk1 PE=1 SV=1	BRSK1	16	13	-0.0475197	0.488044	0.586948	FALSE	143	116	0.271891
Q9JLN9	Q9JLN9	>sp|Q9JLN9|MTOR_MOUSE Serine/threonine-protein kinase mTOR OS=Mus musculus (Mouse) OX=10090 GN=Mtor PE=1 SV=2	MTOR	17	7	0.312676	0.102275	0.165388	FALSE	137	95	0.583218
O88844	O88844	>sp|O88844|IDHC_MOUSE Isocitrate dehydrogenase [NADP] cytoplasmic OS=Mus musculus (Mouse) OX=10090 GN=Idh1 PE=1 SV=2	IDH1	20	14	-0.135381	0.0829202	0.138644	FALSE	161	137	0.179242
P61750;P84084;Q8BSL7	P61750;P84084;Q8BSL7	>sp|P61750|ARF4_MOUSE ADP-ribosylation factor 4 OS=Mus musculus (Mouse) OX=10090 GN=Arf4 PE=1 SV=2;>sp|P84084|ARF5_MOUSE ADP-ribosylation factor 5 OS=Mus musculus (Mouse) OX=10090 GN=Arf5 PE=1 SV=2;>sp|Q8BSL7|ARF2_MOUSE ADP-ribosylation factor 2 OS=Mus musculus (Mouse) OX=10090 GN=Arf2 PE=1 SV=2	ARF4;ARF5;ARF2	5	4	-0.0759672	0.4293	0.53357	FALSE	45	37	0.243768
Q91YN0	Q91YN0	>sp|Q91YN0|CL004_MOUSE Protein C12orf4 homolog OS=Mus musculus (Mouse) OX=10090 GN=D6Wsu163e PE=1 SV=1	D6WSU163E	3	1	0.065418	0.65568	0.733493	FALSE	22	14	0.740329
Q9CQI6	Q9CQI6	>sp|Q9CQI6|COTL1_MOUSE Coactosin-like protein OS=Mus musculus (Mouse) OX=10090 GN=Cotl1 PE=1 SV=3	COTL1	10	6	-0.661226	1.22e-06	9.17375e-06	TRUE	78	76	-0.107186
Q8C1B1	Q8C1B1	>sp|Q8C1B1|CAMP2_MOUSE Calmodulin-regulated spectrin-associated protein 2 OS=Mus musculus (Mouse) OX=10090 GN=Camsap2 PE=1 SV=3	CAMSAP2	9	1	-0.255956	0.299596	0.401787	FALSE	46	46	-0.157414
Q8BLK3	Q8BLK3	>sp|Q8BLK3|LSAMP_MOUSE Limbic system-associated membrane protein OS=Mus musculus (Mouse) OX=10090 GN=Lsamp PE=1 SV=1	LSAMP	9	8	-0.13039	0.0655451	0.113402	FALSE	85	71	0.213833
Q91W97	Q91W97	>sp|Q91W97|HKDC1_MOUSE Hexokinase HKDC1 OS=Mus musculus (Mouse) OX=10090 GN=Hkdc1 PE=2 SV=1	HKDC1	1	1	-0.101907	0.32842	0.431151	FALSE	10	8	0.266117
Q91WC0	Q91WC0	>sp|Q91WC0|SETD3_MOUSE Actin-histidine N-methyltransferase OS=Mus musculus (Mouse) OX=10090 GN=Setd3 PE=1 SV=1	SETD3	17	9	-0.0515044	0.371603	0.476744	FALSE	134	112	0.209158
Q8VE70	Q8VE70	>sp|Q8VE70|PDC10_MOUSE Programmed cell death protein 10 OS=Mus musculus (Mouse) OX=10090 GN=Pdcd10 PE=1 SV=1	PDCD10	7	6	-0.387885	0.000207985	0.000766529	TRUE	65	52	0.303883
Q9CQZ6	Q9CQZ6	>sp|Q9CQZ6|NDUB3_MOUSE NADH dehydrogenase [ubiquinone] 1 beta subcomplex subunit 3 OS=Mus musculus (Mouse) OX=10090 GN=Ndufb3 PE=1 SV=1	NDUFB3	3	3	0.0435764	0.467256	0.568094	FALSE	28	24	0.147299
Q9QWW1	Q9QWW1	>sp|Q9QWW1|HOME2_MOUSE Homer protein homolog 2 OS=Mus musculus (Mouse) OX=10090 GN=Homer2 PE=1 SV=1	HOMER2	6	3	0.175598	0.160727	0.242322	FALSE	36	26	0.488752
Q99KI0	Q99KI0	>sp|Q99KI0|ACON_MOUSE Aconitate hydratase, mitochondrial OS=Mus musculus (Mouse) OX=10090 GN=Aco2 PE=1 SV=1	ACO2	34	30	-0.279353	7.64049e-06	4.45855e-05	TRUE	310	261	0.202769
Q8BUK6	Q8BUK6	>sp|Q8BUK6|HOOK3_MOUSE Protein Hook homolog 3 OS=Mus musculus (Mouse) OX=10090 GN=Hook3 PE=1 SV=2	HOOK3	14	9	-0.217381	0.000931661	0.00283061	FALSE	109	96	0.107692
Q61062	Q61062	>sp|Q61062|DVL3_MOUSE Segment polarity protein dishevelled homolog DVL-3 OS=Mus musculus (Mouse) OX=10090 GN=Dvl3 PE=1 SV=2	DVL3	3	0					6	10	-1.03511
Q6PDI6	Q6PDI6	>sp|Q6PDI6|MINY2_MOUSE Ubiquitin carboxyl-terminal hydrolase MINDY-2 OS=Mus musculus (Mouse) OX=10090 GN=Mindy2 PE=1 SV=1	MINDY2	5	1	-0.233596	0.0964118	0.157034	FALSE	19	24	-0.619003
Q8BVG8	Q8BVG8	>sp|Q8BVG8|NAT14_MOUSE N-acetyltransferase 14 OS=Mus musculus (Mouse) OX=10090 GN=Nat14 PE=1 SV=1	NAT14	1	1	0.480577	0.0454288	0.0829795	FALSE	8	6	0.370102
Q3TPX4	Q3TPX4	>sp|Q3TPX4|EXOC5_MOUSE Exocyst complex component 5 OS=Mus musculus (Mouse) OX=10090 GN=Exoc5 PE=1 SV=2	EXOC5	14	6	-0.160366	0.004926	0.0122001	FALSE	100	96	-0.0782059
Q99LI7	Q99LI7	>sp|Q99LI7|CSTF3_MOUSE Cleavage stimulation factor subunit 3 OS=Mus musculus (Mouse) OX=10090 GN=Cstf3 PE=1 SV=1	CSTF3	10	3	0.163979	0.115223	0.18267	FALSE	66	48	0.475649
Q9D7A8	Q9D7A8	>sp|Q9D7A8|ARMC1_MOUSE Armadillo repeat-containing protein 1 OS=Mus musculus (Mouse) OX=10090 GN=Armc1 PE=1 SV=1	ARMC1	6	6	0.108489	0.139201	0.215262	FALSE	58	48	0.229049
O70372	O70372	>sp|O70372|TERT_MOUSE Telomerase reverse transcriptase OS=Mus musculus (Mouse) OX=10090 GN=Tert PE=1 SV=1	TERT	1	0					7	6	0.0889627
Q9DC70	Q9DC70	>sp|Q9DC70|NDUS7_MOUSE NADH dehydrogenase [ubiquinone] iron-sulfur protein 7, mitochondrial OS=Mus musculus (Mouse) OX=10090 GN=Ndufs7 PE=1 SV=1	NDUFS7	7	4	-0.156131	0.0830762	0.138819	FALSE	56	51	0.0302236
Q505F5	Q505F5	>sp|Q505F5|LRC47_MOUSE Leucine-rich repeat-containing protein 47 OS=Mus musculus (Mouse) OX=10090 GN=Lrrc47 PE=1 SV=1	LRRC47	17	15	0.111421	0.0560338	0.0990749	FALSE	157	124	0.329302
Q8K201	Q8K201	>sp|Q8K201|KCT2_MOUSE Keratinocyte-associated transmembrane protein 2 OS=Mus musculus (Mouse) OX=10090 GN=Kct2 PE=1 SV=2	KCT2	2	1	-0.405499	0.0644802	0.111782	FALSE	14	15	-0.291659
P21952;P31360;P31361	P21952;P31360;P31361	>sp|P21952|PO3F1_MOUSE POU domain, class 3, transcription factor 1 OS=Mus musculus (Mouse) OX=10090 GN=Pou3f1 PE=1 SV=1;>sp|P31360|PO3F2_MOUSE POU domain, class 3, transcription factor 2 OS=Mus musculus (Mouse) OX=10090 GN=Pou3f2 PE=1 SV=1;>sp|P31361|PO3F3_MOUSE POU domain, class 3, transcription factor 3 OS=Mus musculus (Mouse) OX=10090 GN=Pou3f3 PE=2 SV=2	POU3F1;POU3F2;POU3F3	1	0					6	7	-0.470897
Q99KU0	Q99KU0	>sp|Q99KU0|VMP1_MOUSE Vacuole membrane protein 1 OS=Mus musculus (Mouse) OX=10090 GN=Vmp1 PE=1 SV=2	VMP1	4	3	-0.354347	0.00470153	0.0116708	FALSE	32	28	0.12594
P39054	P39054	>sp|P39054|DYN2_MOUSE Dynamin-2 OS=Mus musculus (Mouse) OX=10090 GN=Dnm2 PE=1 SV=2	DNM2	15	6	-0.812628	1.85878e-09	4.35289e-08	TRUE	81	90	-0.366477
Q7TPR4;Q9JI91	Q7TPR4;Q9JI91	>sp|Q7TPR4|ACTN1_MOUSE Alpha-actinin-1 OS=Mus musculus (Mouse) OX=10090 GN=Actn1 PE=1 SV=1;>sp|Q9JI91|ACTN2_MOUSE Alpha-actinin-2 OS=Mus musculus (Mouse) OX=10090 GN=Actn2 PE=1 SV=2	ACTN1;ACTN2	2	2	-1.01225	3.63938e-08	4.93019e-07	TRUE	19	15	0.29913
P53811	P53811	>sp|P53811|PIPNB_MOUSE Phosphatidylinositol transfer protein beta isoform OS=Mus musculus (Mouse) OX=10090 GN=Pitpnb PE=1 SV=2	PITPNB	8	3	-0.055268	0.55506	0.647371	FALSE	51	50	-0.147885
P28028;Q99N57	P28028;Q99N57	>sp|P28028|BRAF_MOUSE Serine/threonine-protein kinase B-raf OS=Mus musculus (Mouse) OX=10090 GN=Braf PE=1 SV=3;>sp|Q99N57|RAF1_MOUSE RAF proto-oncogene serine/threonine-protein kinase OS=Mus musculus (Mouse) OX=10090 GN=Raf1 PE=1 SV=2	BRAF;RAF1	1	1	-0.457916	0.000689202	0.00217825	TRUE	10	8	0.266117
Q99JP0	Q99JP0	>sp|Q99JP0|M4K3_MOUSE Mitogen-activated protein kinase kinase kinase kinase 3 OS=Mus musculus (Mouse) OX=10090 GN=Map4k3 PE=1 SV=4	MAP4K3	9	2	-0.661968	0.000313237	0.00109623	TRUE	53	54	-0.197075
P60867	P60867	>sp|P60867|RS20_MOUSE 40S ribosomal protein S20 OS=Mus musculus (Mouse) OX=10090 GN=Rps20 PE=1 SV=1	RPS20	4	4	0.281422	0.00495413	0.0122641	FALSE	40	32	0.297538
P52480;P53657	P52480;P53657	>sp|P52480|KPYM_MOUSE Pyruvate kinase PKM OS=Mus musculus (Mouse) OX=10090 GN=Pkm PE=1 SV=4;>sp|P53657|KPYR_MOUSE Pyruvate kinase PKLR OS=Mus musculus (Mouse) OX=10090 GN=Pklr PE=1 SV=1	PKM;PKLR	1	1	-0.475578	2.64275e-05	0.000129953	TRUE	10	8	0.266117
P28652;Q923T9	P28652;Q923T9	>sp|P28652|KCC2B_MOUSE Calcium/calmodulin-dependent protein kinase type II subunit beta OS=Mus musculus (Mouse) OX=10090 GN=Camk2b PE=1 SV=2;>sp|Q923T9|KCC2G_MOUSE Calcium/calmodulin-dependent protein kinase type II subunit gamma OS=Mus musculus (Mouse) OX=10090 GN=Camk2g PE=1 SV=1	CAMK2B;CAMK2G	5	3	-0.70665	9.31059e-08	1.0657e-06	TRUE	41	36	0.11101
Q9JKV1	Q9JKV1	>sp|Q9JKV1|ADRM1_MOUSE Proteasomal ubiquitin receptor ADRM1 OS=Mus musculus (Mouse) OX=10090 GN=Adrm1 PE=1 SV=2	ADRM1	5	3	-0.20533	0.0443171	0.0813056	FALSE	35	32	0.0164225
B0F2B4;Q69ZK9;Q8BYM5	B0F2B4;Q69ZK9;Q8BYM5	>sp|B0F2B4|NLGN4_MOUSE Neuroligin 4-like OS=Mus musculus (Mouse) OX=10090 GN=Nlgn4l PE=1 SV=1;>sp|Q69ZK9|NLGN2_MOUSE Neuroligin-2 OS=Mus musculus (Mouse) OX=10090 GN=Nlgn2 PE=1 SV=2;>sp|Q8BYM5|NLGN3_MOUSE Neuroligin-3 OS=Mus musculus (Mouse) OX=10090 GN=Nlgn3 PE=1 SV=2	NLGN4L;NLGN2;NLGN3	1	1	-1.10195	2.68276e-08	3.86289e-07	TRUE	10	8	0.266117
Q9DB50	Q9DB50	>sp|Q9DB50|AP1S2_MOUSE AP-1 complex subunit sigma-2 OS=Mus musculus (Mouse) OX=10090 GN=Ap1s2 PE=1 SV=1	AP1S2	3	1	-0.913362	2.65952e-06	1.78834e-05	TRUE	20	23	-0.419348
Q9Z0R4	Q9Z0R4	>sp|Q9Z0R4|ITSN1_MOUSE Intersectin-1 OS=Mus musculus (Mouse) OX=10090 GN=Itsn1 PE=1 SV=2	ITSN1	26	20	0.0183763	0.896	0.925399	FALSE	223	194	0.130665
P12849	P12849	>sp|P12849|KAP1_MOUSE cAMP-dependent protein kinase type I-beta regulatory subunit OS=Mus musculus (Mouse) OX=10090 GN=Prkar1b PE=1 SV=2	PRKAR1B	7	5	-0.0954525	0.193646	0.282663	FALSE	60	51	0.177984
Q78JE5	Q78JE5	>sp|Q78JE5|FBX22_MOUSE F-box only protein 22 OS=Mus musculus (Mouse) OX=10090 GN=Fbxo22 PE=1 SV=2	FBXO22	6	4	-0.372995	0.00274186	0.00726244	TRUE	51	44	0.149248
Q60875	Q60875	>sp|Q60875|ARHG2_MOUSE Rho guanine nucleotide exchange factor 2 OS=Mus musculus (Mouse) OX=10090 GN=Arhgef2 PE=1 SV=4	ARHGEF2	22	2	-1.29895	8.06541e-09	1.4004e-07	TRUE	68	152	-1.79103
Q3TMH2	Q3TMH2	>sp|Q3TMH2|SCRN3_MOUSE Secernin-3 OS=Mus musculus (Mouse) OX=10090 GN=Scrn3 PE=1 SV=1	SCRN3	3	1	-0.383086	0.0111754	0.0252204	FALSE	20	18	0.035974
Q8BVE3	Q8BVE3	>sp|Q8BVE3|VATH_MOUSE V-type proton ATPase subunit H OS=Mus musculus (Mouse) OX=10090 GN=Atp6v1h PE=1 SV=1	ATP6V1H	21	19	0.0225805	0.734794	0.797709	FALSE	199	160	0.295965
Q9DAG5	Q9DAG5	>sp|Q9DAG5|STPG4_MOUSE Protein STPG4 OS=Mus musculus (Mouse) OX=10090 GN=Stpg4 PE=1 SV=1	STPG4	1	1	0.0732728	0.730739	0.794422	FALSE	9	7	0.28234
Q9Z2F7	Q9Z2F7	>sp|Q9Z2F7|BNI3L_MOUSE BCL2/adenovirus E1B 19 kDa protein-interacting protein 3-like OS=Mus musculus (Mouse) OX=10090 GN=Bnip3l PE=1 SV=1	BNIP3L	2	0					6	11	-1.21812
Q80YV2	Q80YV2	>sp|Q80YV2|NIPA_MOUSE Nuclear-interacting partner of ALK OS=Mus musculus (Mouse) OX=10090 GN=Zc3hc1 PE=1 SV=1	ZC3HC1	2	1	-0.0993509	0.611596	0.69665	FALSE	10	12	-0.439396
Q9Z2B9	Q9Z2B9	>sp|Q9Z2B9|KS6A4_MOUSE Ribosomal protein S6 kinase alpha-4 OS=Mus musculus (Mouse) OX=10090 GN=Rps6ka4 PE=1 SV=2	RPS6KA4	3	1	0.192988	0.171279	0.255244	FALSE	23	13	0.982476
P35276;P55258;P61028;P62823;P63011;Q9CZT8	P35276;P55258;P61028;P62823;P63011;Q9CZT8	>sp|P35276|RAB3D_MOUSE Ras-related protein Rab-3D OS=Mus musculus (Mouse) OX=10090 GN=Rab3d PE=1 SV=1;>sp|P55258|RAB8A_MOUSE Ras-related protein Rab-8A OS=Mus musculus (Mouse) OX=10090 GN=Rab8a PE=1 SV=2;>sp|P61028|RAB8B_MOUSE Ras-related protein Rab-8B OS=Mus musculus (Mouse) OX=10090 GN=Rab8b PE=1 SV=1;>sp|P62823|RAB3C_MOUSE Ras-related protein Rab-3C OS=Mus musculus (Mouse) OX=10090 GN=Rab3c P…	RAB3D;RAB8A;RAB8B;RAB3C;RAB3A;RAB3B	1	1	-0.0650418	0.452597	0.554877	FALSE	10	8	0.266117
Q99N87	Q99N87	>sp|Q99N87|RT05_MOUSE 28S ribosomal protein S5, mitochondrial OS=Mus musculus (Mouse) OX=10090 GN=Mrps5 PE=1 SV=1	MRPS5	7	4	0.153721	0.208734	0.300635	FALSE	54	42	0.345573
Q9JM13	Q9JM13	>sp|Q9JM13|RABX5_MOUSE Rab5 GDP/GTP exchange factor OS=Mus musculus (Mouse) OX=10090 GN=Rabgef1 PE=1 SV=1	RABGEF1	4	2	-0.165852	0.0920291	0.15071	FALSE	21	22	-0.250835
Q8BTY2	Q8BTY2	>sp|Q8BTY2|S4A7_MOUSE Sodium bicarbonate cotransporter 3 OS=Mus musculus (Mouse) OX=10090 GN=Slc4a7 PE=1 SV=2	SLC4A7	14	9	0.228087	0.000702333	0.00221587	FALSE	118	84	0.535485
P62700	P62700	>sp|P62700|YPEL5_MOUSE Protein yippee-like 5 OS=Mus musculus (Mouse) OX=10090 GN=Ypel5 PE=1 SV=1	YPEL5	3	1	-0.552671	0.00181977	0.00506803	TRUE	15	16	-0.309896
G3XA03	G3XA03	>tr|G3XA03|G3XA03_MOUSE Takusan domain-containing protein OS=Mus musculus (Mouse) OX=10090 GN=Gm5152 PE=4 SV=2	GM5152	1	1	0.0466089	0.925005	0.944189	FALSE	10	8	0.266117
Q9D6Y7	Q9D6Y7	>sp|Q9D6Y7|MSRA_MOUSE Mitochondrial peptide methionine sulfoxide reductase OS=Mus musculus (Mouse) OX=10090 GN=Msra PE=1 SV=1	MSRA	9	4	-0.77379	3.24112e-10	1.0899e-08	TRUE	60	69	-0.458379
Q58A65;Q9ESN9	Q58A65;Q9ESN9	>sp|Q58A65|JIP4_MOUSE C-Jun-amino-terminal kinase-interacting protein 4 OS=Mus musculus (Mouse) OX=10090 GN=Spag9 PE=1 SV=2;>sp|Q9ESN9|JIP3_MOUSE C-Jun-amino-terminal kinase-interacting protein 3 OS=Mus musculus (Mouse) OX=10090 GN=Mapk8ip3 PE=1 SV=1	SPAG9;MAPK8IP3	4	4	-0.208951	0.0267281	0.0531616	FALSE	39	30	0.373189
Q8C166	Q8C166	>sp|Q8C166|CPNE1_MOUSE Copine-1 OS=Mus musculus (Mouse) OX=10090 GN=Cpne1 PE=1 SV=1	CPNE1	7	4	-0.359319	0.000621705	0.00199166	TRUE	58	50	0.131108
Q6GQS1	Q6GQS1	>sp|Q6GQS1|SCMC3_MOUSE Calcium-binding mitochondrial carrier protein SCaMC-3 OS=Mus musculus (Mouse) OX=10090 GN=Slc25a23 PE=1 SV=1	SLC25A23	16	4	-1.0076	3.77523e-07	3.44673e-06	TRUE	81	118	-0.944386
V9GX35	V9GX35	>tr|V9GX35|V9GX35_MOUSE Ribosomal_L7Ae domain-containing protein OS=Mus musculus (Mouse) OX=10090 GN=Gm14214 PE=4 SV=1	GM14214	1	1	1.13649	2.45314e-07	2.40173e-06	TRUE	9	6	0.587491
Q80W14	Q80W14	>sp|Q80W14|PR40B_MOUSE Pre-mRNA-processing factor 40 homolog B OS=Mus musculus (Mouse) OX=10090 GN=Prpf40b PE=1 SV=2	PRPF40B	2	1	-0.156752	0.226646	0.321642	FALSE	9	12	-0.680991
P70206;Q80UG2	P70206;Q80UG2	>sp|P70206|PLXA1_MOUSE Plexin-A1 OS=Mus musculus (Mouse) OX=10090 GN=Plxna1 PE=1 SV=1;>sp|Q80UG2|PLXA4_MOUSE Plexin-A4 OS=Mus musculus (Mouse) OX=10090 GN=Plxna4 PE=1 SV=3	PLXNA1;PLXNA4	2	1	0.367534	0.271675	0.371521	FALSE	15	10	0.643011
P61255	P61255	>sp|P61255|RL26_MOUSE 60S ribosomal protein L26 OS=Mus musculus (Mouse) OX=10090 GN=Rpl26 PE=1 SV=1	RPL26	9	5	0.671127	6.53117e-06	3.90715e-05	TRUE	71	64	0.0498811
Q6NVG1	Q6NVG1	>sp|Q6NVG1|LPCT4_MOUSE Lysophospholipid acyltransferase LPCAT4 OS=Mus musculus (Mouse) OX=10090 GN=Lpcat4 PE=1 SV=1	LPCAT4	6	3	-0.53251	5.9873e-05	0.000259738	TRUE	39	40	-0.222764
Q80ZX0	Q80ZX0	>tr|Q80ZX0|Q80ZX0_MOUSE Sec24-related gene family, member B (S. cerevisiae) OS=Mus musculus (Mouse) OX=10090 GN=Sec24b PE=1 SV=1	SEC24B	15	10	-0.211982	0.00929192	0.0215261	FALSE	116	100	0.150067
Q60803	Q60803	>sp|Q60803|TRAF3_MOUSE TNF receptor-associated factor 3 OS=Mus musculus (Mouse) OX=10090 GN=Traf3 PE=1 SV=2	TRAF3	9	5	0.030649	0.752462	0.81097	FALSE	72	56	0.346744
Q8VHX6	Q8VHX6	>sp|Q8VHX6|FLNC_MOUSE Filamin-C OS=Mus musculus (Mouse) OX=10090 GN=Flnc PE=1 SV=3	FLNC	1	0					7	7	-0.132747
Q8K1L5	Q8K1L5	>sp|Q8K1L5|PP1RB_MOUSE E3 ubiquitin-protein ligase PPP1R11 OS=Mus musculus (Mouse) OX=10090 GN=Ppp1r11 PE=1 SV=1	PPP1R11	2	2	0.051754	0.689839	0.760649	FALSE	20	16	0.286542
Q52KF3	Q52KF3	>sp|Q52KF3|SPIR1_MOUSE Protein spire homolog 1 OS=Mus musculus (Mouse) OX=10090 GN=Spire1 PE=1 SV=1	SPIRE1	2	1	-0.119837	0.465436	0.566772	FALSE	16	12	0.389184
Q9CQ54	Q9CQ54	>sp|Q9CQ54|NDUC2_MOUSE NADH dehydrogenase [ubiquinone] 1 subunit C2 OS=Mus musculus (Mouse) OX=10090 GN=Ndufc2 PE=1 SV=1	NDUFC2	7	6	-0.108273	0.347407	0.451588	FALSE	64	51	0.307592
E9Q7X7;Q6P9K9	E9Q7X7;Q6P9K9	>sp|E9Q7X7|NRX2A_MOUSE Neurexin-2 OS=Mus musculus (Mouse) OX=10090 GN=Nrxn2 PE=1 SV=1;>sp|Q6P9K9|NRX3A_MOUSE Neurexin-3 OS=Mus musculus (Mouse) OX=10090 GN=Nrxn3 PE=1 SV=2	NRXN2;NRXN3	1	0					6	8	-0.667498
Q9Z2Z9	Q9Z2Z9	>sp|Q9Z2Z9|GFPT2_MOUSE Glutamine--fructose-6-phosphate aminotransferase [isomerizing] 2 OS=Mus musculus (Mouse) OX=10090 GN=Gfpt2 PE=1 SV=3	GFPT2	5	0					6	21	-2.63201
P48428	P48428	>sp|P48428|TBCA_MOUSE Tubulin-specific chaperone A OS=Mus musculus (Mouse) OX=10090 GN=Tbca PE=1 SV=3	TBCA	4	2	-0.183579	0.458887	0.560816	FALSE	28	22	0.319377
E9PUQ8	E9PUQ8	>tr|E9PUQ8|E9PUQ8_MOUSE Diacylglycerol kinase OS=Mus musculus (Mouse) OX=10090 GN=Dgkd PE=1 SV=1	DGKD	7	3	-0.298696	0.0116976	0.0262456	FALSE	53	42	0.301303
Q8C8N2	Q8C8N2	>sp|Q8C8N2|SCAI_MOUSE Protein SCAI OS=Mus musculus (Mouse) OX=10090 GN=Scai PE=1 SV=2	SCAI	17	14	-0.0556136	0.269389	0.369327	FALSE	144	122	0.180892
Q8K4M5	Q8K4M5	>sp|Q8K4M5|COMD1_MOUSE COMM domain-containing protein 1 OS=Mus musculus (Mouse) OX=10090 GN=Commd1 PE=1 SV=2	COMMD1	2	2	0.0881984	0.449263	0.551935	FALSE	20	16	0.286542
Q80W54	Q80W54	>sp|Q80W54|FACE1_MOUSE CAAX prenyl protease 1 homolog OS=Mus musculus (Mouse) OX=10090 GN=Zmpste24 PE=1 SV=2	ZMPSTE24	8	4	-0.0257297	0.863921	0.901483	FALSE	59	51	0.146435
Q3THE2;Q9CQ19	Q3THE2;Q9CQ19	>sp|Q3THE2|ML12B_MOUSE Myosin regulatory light chain 12B OS=Mus musculus (Mouse) OX=10090 GN=Myl12b PE=1 SV=2;>sp|Q9CQ19|MYL9_MOUSE Myosin regulatory light polypeptide 9 OS=Mus musculus (Mouse) OX=10090 GN=Myl9 PE=1 SV=3	MYL12B;MYL9	4	4	-0.327587	0.000227354	0.000827021	TRUE	40	32	0.297538
O08582	O08582	>sp|O08582|GTPB1_MOUSE GTP-binding protein 1 OS=Mus musculus (Mouse) OX=10090 GN=Gtpbp1 PE=1 SV=2	GTPBP1	8	4	-0.0476326	0.434092	0.538167	FALSE	55	56	-0.191995
Q8R4C2;Q9D394	Q8R4C2;Q9D394	>sp|Q8R4C2|RUFY2_MOUSE RUN and FYVE domain-containing protein 2 OS=Mus musculus (Mouse) OX=10090 GN=Rufy2 PE=1 SV=2;>sp|Q9D394|RUFY3_MOUSE Protein RUFY3 OS=Mus musculus (Mouse) OX=10090 GN=Rufy3 PE=1 SV=1	RUFY2;RUFY3	1	1	0.0701213	0.658625	0.735974	FALSE	10	8	0.266117
P17742	P17742	>sp|P17742|PPIA_MOUSE Peptidyl-prolyl cis-trans isomerase A OS=Mus musculus (Mouse) OX=10090 GN=Ppia PE=1 SV=2	PPIA	12	6	-0.269553	0.00511817	0.0126183	FALSE	89	81	0.0339409
Q9DCB8	Q9DCB8	>sp|Q9DCB8|ISCA2_MOUSE Iron-sulfur cluster assembly 2 homolog, mitochondrial OS=Mus musculus (Mouse) OX=10090 GN=Isca2 PE=1 SV=2	ISCA2	4	4	-0.0467055	0.525658	0.621921	FALSE	40	32	0.297538
P18760;P45591	P18760;P45591	>sp|P18760|COF1_MOUSE Cofilin-1 OS=Mus musculus (Mouse) OX=10090 GN=Cfl1 PE=1 SV=3;>sp|P45591|COF2_MOUSE Cofilin-2 OS=Mus musculus (Mouse) OX=10090 GN=Cfl2 PE=1 SV=1	CFL1;CFL2	1	1	-0.529887	0.00889815	0.0206847	FALSE	10	8	0.266117
P63168;Q9D0M5	P63168;Q9D0M5	>sp|P63168|DYL1_MOUSE Dynein light chain 1, cytoplasmic OS=Mus musculus (Mouse) OX=10090 GN=Dynll1 PE=1 SV=1;>sp|Q9D0M5|DYL2_MOUSE Dynein light chain 2, cytoplasmic OS=Mus musculus (Mouse) OX=10090 GN=Dynll2 PE=1 SV=1	DYNLL1;DYNLL2	1	1	-0.204242	0.141058	0.217823	FALSE	10	8	0.266117
Q5DU41	Q5DU41	>sp|Q5DU41|LRC8B_MOUSE Volume-regulated anion channel subunit LRRC8B OS=Mus musculus (Mouse) OX=10090 GN=Lrrc8b PE=1 SV=3	LRRC8B	2	2	-0.0416124	0.695653	0.76516	FALSE	19	14	0.426604
Q62417	Q62417	>sp|Q62417|SRBS1_MOUSE Sorbin and SH3 domain-containing protein 1 OS=Mus musculus (Mouse) OX=10090 GN=Sorbs1 PE=1 SV=2	SORBS1	24	5	-0.787745	4.10202e-06	2.61583e-05	TRUE	115	157	-0.807865
O08553;P97427;Q62188	O08553;P97427;Q62188	>sp|O08553|DPYL2_MOUSE Dihydropyrimidinase-related protein 2 OS=Mus musculus (Mouse) OX=10090 GN=Dpysl2 PE=1 SV=2;>sp|P97427|DPYL1_MOUSE Dihydropyrimidinase-related protein 1 OS=Mus musculus (Mouse) OX=10090 GN=Crmp1 PE=1 SV=1;>sp|Q62188|DPYL3_MOUSE Dihydropyrimidinase-related protein 3 OS=Mus musculus (Mouse) OX=10090 GN=Dpysl3 PE=1 SV=1	DPYSL2;CRMP1;DPYSL3	2	1	-0.291048	0.00720079	0.017174	FALSE	16	13	0.258176
Q8BGS2	Q8BGS2	>sp|Q8BGS2|BOLA2_MOUSE BolA-like protein 2 OS=Mus musculus (Mouse) OX=10090 GN=Bola2 PE=1 SV=1	BOLA2	2	1	-0.103628	0.530479	0.62612	FALSE	18	12	0.653727
H3BKQ3	H3BKQ3	>tr|H3BKQ3|H3BKQ3_MOUSE Rab-GAP TBC domain-containing protein OS=Mus musculus (Mouse) OX=10090 GN=Evi5l PE=1 SV=1	EVI5L	6	0					17	34	-1.55715
Q8VE18	Q8VE18	>sp|Q8VE18|SMG8_MOUSE Protein SMG8 OS=Mus musculus (Mouse) OX=10090 GN=Smg8 PE=1 SV=1	SMG8	3	0					24	14	0.889472
O88983	O88983	>sp|O88983|STX8_MOUSE Syntaxin-8 OS=Mus musculus (Mouse) OX=10090 GN=Stx8 PE=1 SV=1	STX8	4	3	0.346171	0.0156444	0.0337849	FALSE	37	25	0.631294
Q91YI4	Q91YI4	>sp|Q91YI4|ARRB2_MOUSE Beta-arrestin-2 OS=Mus musculus (Mouse) OX=10090 GN=Arrb2 PE=1 SV=1	ARRB2	6	1	-0.622165	0.000859349	0.002633	TRUE	30	36	-0.538317
P83510;P97820;Q9JM52	P83510;P97820;Q9JM52	>sp|P83510|TNIK_MOUSE Traf2 and NCK-interacting protein kinase OS=Mus musculus (Mouse) OX=10090 GN=Tnik PE=1 SV=2;>sp|P97820|M4K4_MOUSE Mitogen-activated protein kinase kinase kinase kinase 4 OS=Mus musculus (Mouse) OX=10090 GN=Map4k4 PE=1 SV=1;>sp|Q9JM52|MINK1_MOUSE Misshapen-like kinase 1 OS=Mus musculus (Mouse) OX=10090 GN=Mink1 PE=1 SV=3	TNIK;MAP4K4;MINK1	9	9	-0.115062	0.0547293	0.0971567	FALSE	89	71	0.306963
Q3UZ39;Q91WK0	Q3UZ39;Q91WK0	>sp|Q3UZ39|LRRF1_MOUSE Leucine-rich repeat flightless-interacting protein 1 OS=Mus musculus (Mouse) OX=10090 GN=Lrrfip1 PE=1 SV=2;>sp|Q91WK0|LRRF2_MOUSE Leucine-rich repeat flightless-interacting protein 2 OS=Mus musculus (Mouse) OX=10090 GN=Lrrfip2 PE=1 SV=1	LRRFIP1;LRRFIP2	1	1	-0.274897	0.192937	0.281857	FALSE	8	8	-0.185031
O70492;O70493	O70492;O70493	>sp|O70492|SNX3_MOUSE Sorting nexin-3 OS=Mus musculus (Mouse) OX=10090 GN=Snx3 PE=1 SV=3;>sp|O70493|SNX12_MOUSE Sorting nexin-12 OS=Mus musculus (Mouse) OX=10090 GN=Snx12 PE=1 SV=1	SNX3;SNX12	2	2	-0.270986	0.0882879	0.145685	FALSE	19	16	0.185644
Q9QXT0	Q9QXT0	>sp|Q9QXT0|CNPY2_MOUSE Protein canopy homolog 2 OS=Mus musculus (Mouse) OX=10090 GN=Cnpy2 PE=1 SV=1	CNPY2	7	4	-0.218698	0.00786319	0.0185334	FALSE	59	51	0.147439
Q8CBE3	Q8CBE3	>sp|Q8CBE3|WDR37_MOUSE WD repeat-containing protein 37 OS=Mus musculus (Mouse) OX=10090 GN=Wdr37 PE=1 SV=1	WDR37	13	10	0.0731406	0.124269	0.194843	FALSE	118	96	0.264406
P70296	P70296	>sp|P70296|PEBP1_MOUSE Phosphatidylethanolamine-binding protein 1 OS=Mus musculus (Mouse) OX=10090 GN=Pebp1 PE=1 SV=3	PEBP1	10	9	-0.114459	0.0884553	0.145916	FALSE	95	79	0.218849
Q6PAV2	Q6PAV2	>sp|Q6PAV2|HERC4_MOUSE Probable E3 ubiquitin-protein ligase HERC4 OS=Mus musculus (Mouse) OX=10090 GN=Herc4 PE=1 SV=2	HERC4	11	4	-0.256188	0.00135527	0.00390705	TRUE	66	61	0.00627171
Q9CZX7	Q9CZX7	>sp|Q9CZX7|PP4P2_MOUSE Type 2 phosphatidylinositol 4,5-bisphosphate 4-phosphatase OS=Mus musculus (Mouse) OX=10090 GN=Pip4p2 PE=1 SV=1	PIP4P2	5	4	-0.193097	0.0195826	0.0409819	FALSE	43	33	0.383085
Q9CZ42	Q9CZ42	>sp|Q9CZ42|NNRD_MOUSE ATP-dependent (S)-NAD(P)H-hydrate dehydratase OS=Mus musculus (Mouse) OX=10090 GN=Naxd PE=1 SV=1	NAXD	11	9	0.12578	0.0286617	0.0564066	FALSE	96	83	0.1472
V9GXQ2	V9GXQ2	>tr|V9GXQ2|V9GXQ2_MOUSE Predicted gene 17087 OS=Mus musculus (Mouse) OX=10090 GN=Gm17087 PE=1 SV=1	GM17087	1	1	-0.491172	0.00342358	0.00880972	TRUE	10	8	0.266117
Q6PHQ8	Q6PHQ8	>sp|Q6PHQ8|NAA35_MOUSE N-alpha-acetyltransferase 35, NatC auxiliary subunit OS=Mus musculus (Mouse) OX=10090 GN=Naa35 PE=1 SV=1	NAA35	10	5	0.160244	0.0731833	0.124792	FALSE	76	59	0.367984
P60904	P60904	>sp|P60904|DNJC5_MOUSE DnaJ homolog subfamily C member 5 OS=Mus musculus (Mouse) OX=10090 GN=Dnajc5 PE=1 SV=1	DNAJC5	5	5	-0.23958	0.00577759	0.0141314	FALSE	50	40	0.299806
Q9WV96	Q9WV96	>sp|Q9WV96|T10B_MOUSE Mitochondrial import inner membrane translocase subunit Tim10 B OS=Mus musculus (Mouse) OX=10090 GN=Timm10b PE=1 SV=1	TIMM10B	2	2	-0.0770216	0.569311	0.659446	FALSE	20	16	0.286542
Q8VCH6	Q8VCH6	>sp|Q8VCH6|DHC24_MOUSE Delta(24)-sterol reductase OS=Mus musculus (Mouse) OX=10090 GN=Dhcr24 PE=1 SV=1	DHCR24	2	1	-0.526197	0.00302377	0.00790854	TRUE	16	15	-0.0426212
Q80YD1	Q80YD1	>sp|Q80YD1|SUV3_MOUSE ATP-dependent RNA helicase SUPV3L1, mitochondrial OS=Mus musculus (Mouse) OX=10090 GN=Supv3l1 PE=1 SV=1	SUPV3L1	11	7	-0.0320838	0.633271	0.714474	FALSE	91	80	0.0992051
P83940	P83940	>sp|P83940|ELOC_MOUSE Elongin-C OS=Mus musculus (Mouse) OX=10090 GN=Eloc PE=1 SV=1	ELOC	5	4	-0.410313	0.00127335	0.00370243	TRUE	44	39	0.0932063
P68372;P99024;Q7TMM9;Q9CWF2;Q9D6F9	P68372;P99024;Q7TMM9;Q9CWF2;Q9D6F9	>sp|P68372|TBB4B_MOUSE Tubulin beta-4B chain OS=Mus musculus (Mouse) OX=10090 GN=Tubb4b PE=1 SV=1;>sp|P99024|TBB5_MOUSE Tubulin beta-5 chain OS=Mus musculus (Mouse) OX=10090 GN=Tubb5 PE=1 SV=1;>sp|Q7TMM9|TBB2A_MOUSE Tubulin beta-2A chain OS=Mus musculus (Mouse) OX=10090 GN=Tubb2a PE=1 SV=1;>sp|Q9CWF2|TBB2B_MOUSE Tubulin beta-2B chain OS=Mus musculus (Mouse) OX=10090 GN=Tubb2b PE=1 SV=1;>sp|Q9D6F9…	TUBB4B;TUBB5;TUBB2A;TUBB2B;TUBB4A	4	3	-0.0339593	0.68	0.753638	FALSE	31	25	0.281216
Q9JMG1	Q9JMG1	>sp|Q9JMG1|EDF1_MOUSE Endothelial differentiation-related factor 1 OS=Mus musculus (Mouse) OX=10090 GN=Edf1 PE=1 SV=1	EDF1	3	1	-0.442616	0.000605707	0.00194502	TRUE	12	15	-0.580936
Q9Z275	Q9Z275	>sp|Q9Z275|RLBP1_MOUSE Retinaldehyde-binding protein 1 OS=Mus musculus (Mouse) OX=10090 GN=Rlbp1 PE=1 SV=3	RLBP1	3	1	-0.205138	0.151794	0.231595	FALSE	16	15	-0.0184686
P15116	P15116	>sp|P15116|CADH2_MOUSE Cadherin-2 OS=Mus musculus (Mouse) OX=10090 GN=Cdh2 PE=1 SV=2	CDH2	12	9	0.0216888	0.71654	0.783074	FALSE	97	89	0.0158419
O89116	O89116	>sp|O89116|VTI1A_MOUSE Vesicle transport through interaction with t-SNAREs homolog 1A OS=Mus musculus (Mouse) OX=10090 GN=Vti1a PE=1 SV=1	VTI1A	1	1	-0.303789	0.166289	0.24918	FALSE	9	6	0.586819
E9QAS7	E9QAS7	>tr|E9QAS7|E9QAS7_MOUSE IPPc domain-containing protein OS=Mus musculus (Mouse) OX=10090 GN=Inpp5a PE=1 SV=1	INPP5A	11	3	-0.703932	1.99524e-07	2.01534e-06	TRUE	56	67	-0.518158
Q8CC88	Q8CC88	>sp|Q8CC88|VWA8_MOUSE von Willebrand factor A domain-containing protein 8 OS=Mus musculus (Mouse) OX=10090 GN=Vwa8 PE=1 SV=2	VWA8	36	18	-0.130501	0.326076	0.429135	FALSE	243	222	0.0398861
Q3UPL0	Q3UPL0	>sp|Q3UPL0|SC31A_MOUSE Protein transport protein Sec31A OS=Mus musculus (Mouse) OX=10090 GN=Sec31a PE=1 SV=2	SEC31A	27	18	-0.284548	4.25373e-06	2.69985e-05	TRUE	219	196	0.0725563
Q8R4H9	Q8R4H9	>sp|Q8R4H9|ZNT5_MOUSE Zinc transporter 5 OS=Mus musculus (Mouse) OX=10090 GN=Slc30a5 PE=1 SV=1	SLC30A5	4	0					17	19	-0.417695
Q6PDM2;Q9D0B0	Q6PDM2;Q9D0B0	>sp|Q6PDM2|SRSF1_MOUSE Serine/arginine-rich splicing factor 1 OS=Mus musculus (Mouse) OX=10090 GN=Srsf1 PE=1 SV=3;>sp|Q9D0B0|SRSF9_MOUSE Serine/arginine-rich splicing factor 9 OS=Mus musculus (Mouse) OX=10090 GN=Srsf9 PE=1 SV=1	SRSF1;SRSF9	1	1	0.258737	0.0813143	0.136296	FALSE	10	8	0.266117
Q8BGN8	Q8BGN8	>sp|Q8BGN8|SYNPR_MOUSE Synaptoporin OS=Mus musculus (Mouse) OX=10090 GN=Synpr PE=1 SV=1	SYNPR	1	1	1.19878	1.9467e-07	1.98483e-06	TRUE	10	8	0.266117
Q3TCJ1	Q3TCJ1	>sp|Q3TCJ1|ABRX2_MOUSE BRISC complex subunit Abraxas 2 OS=Mus musculus (Mouse) OX=10090 GN=Abraxas2 PE=1 SV=1	ABRAXAS2	5	4	0.14012	0.0396629	0.074277	FALSE	44	36	0.248514
Q61235	Q61235	>sp|Q61235|SNTB2_MOUSE Beta-2-syntrophin OS=Mus musculus (Mouse) OX=10090 GN=Sntb2 PE=1 SV=2	SNTB2	4	1	-0.0929684	0.516225	0.613504	FALSE	20	15	0.404599
P62855	P62855	>sp|P62855|RS26_MOUSE 40S ribosomal protein S26 OS=Mus musculus (Mouse) OX=10090 GN=Rps26 PE=1 SV=3	RPS26	2	2	1.19981	1.41602e-06	1.04446e-05	TRUE	20	15	0.418129
P62270	P62270	>sp|P62270|RS18_MOUSE 40S ribosomal protein S18 OS=Mus musculus (Mouse) OX=10090 GN=Rps18 PE=1 SV=3	RPS18	12	10	0.755192	1.40151e-07	1.51452e-06	TRUE	109	92	0.195015
P70408	P70408	>sp|P70408|CAD10_MOUSE Cadherin-10 OS=Mus musculus (Mouse) OX=10090 GN=Cdh10 PE=1 SV=3	CDH10	3	2	-0.25733	0.0106733	0.0242489	FALSE	27	21	0.353636
Q8BSS9	Q8BSS9	>sp|Q8BSS9|LIPA2_MOUSE Liprin-alpha-2 OS=Mus musculus (Mouse) OX=10090 GN=Ppfia2 PE=1 SV=2	PPFIA2	29	21	-0.331286	0.00182349	0.00507577	TRUE	244	215	0.104145
Q9JKF6	Q9JKF6	>sp|Q9JKF6|NECT1_MOUSE Nectin-1 OS=Mus musculus (Mouse) OX=10090 GN=Nectin1 PE=1 SV=3	NECTIN1	4	2	-0.0337071	0.822633	0.868332	FALSE	27	29	-0.303444
G3X9B1	G3X9B1	>tr|G3X9B1|G3X9B1_MOUSE BP28CT domain-containing protein OS=Mus musculus (Mouse) OX=10090 GN=Heatr1 PE=1 SV=1	HEATR1	2	0					14	12	0.133251
O35375	O35375	>sp|O35375|NRP2_MOUSE Neuropilin-2 OS=Mus musculus (Mouse) OX=10090 GN=Nrp2 PE=1 SV=2	NRP2	23	19	0.0563175	0.418618	0.523056	FALSE	204	162	0.314849
Q8VCZ6	Q8VCZ6	>sp|Q8VCZ6|SGSM3_MOUSE Small G protein signaling modulator 3 OS=Mus musculus (Mouse) OX=10090 GN=Sgsm3 PE=1 SV=1	SGSM3	2	0					14	14	-0.182136
Q8VDL4	Q8VDL4	>sp|Q8VDL4|ADPGK_MOUSE ADP-dependent glucokinase OS=Mus musculus (Mouse) OX=10090 GN=Adpgk PE=1 SV=2	ADPGK	6	4	-0.204964	0.0314865	0.0611655	FALSE	50	40	0.296548
P70428	P70428	>sp|P70428|EXT2_MOUSE Exostosin-2 OS=Mus musculus (Mouse) OX=10090 GN=Ext2 PE=1 SV=2	EXT2	2	0					9	10	-0.372905
Q9WU00	Q9WU00	>sp|Q9WU00|NRF1_MOUSE Nuclear respiratory factor 1 OS=Mus musculus (Mouse) OX=10090 GN=Nrf1 PE=1 SV=2	NRF1	1	1	0.501254	0.000142677	0.000551752	TRUE	10	7	0.523101
Q8CBY8	Q8CBY8	>sp|Q8CBY8|DCTN4_MOUSE Dynactin subunit 4 OS=Mus musculus (Mouse) OX=10090 GN=Dctn4 PE=1 SV=1	DCTN4	9	7	-0.129776	0.0315002	0.0611701	FALSE	83	70	0.194094
P16627;P17156	P16627;P17156	>sp|P16627|HS71L_MOUSE Heat shock 70 kDa protein 1-like OS=Mus musculus (Mouse) OX=10090 GN=Hspa1l PE=1 SV=4;>sp|P17156|HSP72_MOUSE Heat shock-related 70 kDa protein 2 OS=Mus musculus (Mouse) OX=10090 GN=Hspa2 PE=1 SV=2	HSPA1L;HSPA2	1	1	0.0311818	0.790549	0.842858	FALSE	10	7	0.53156
Q8C3W1	Q8C3W1	>sp|Q8C3W1|CA198_MOUSE Uncharacterized protein C1orf198 homolog OS=Mus musculus (Mouse) OX=10090 GN=MGI:1916801 PE=1 SV=1	MGI:1916801	2	2	0.0907576	0.443425	0.546484	FALSE	19	14	0.444225
Q9R0M6	Q9R0M6	>sp|Q9R0M6|RAB9A_MOUSE Ras-related protein Rab-9A OS=Mus musculus (Mouse) OX=10090 GN=Rab9a PE=1 SV=1	RAB9A	5	4	-0.314237	0.000773287	0.00241162	TRUE	42	37	0.0930055
Q8BH66;Q91YH5	Q8BH66;Q91YH5	>sp|Q8BH66|ATLA1_MOUSE Atlastin-1 OS=Mus musculus (Mouse) OX=10090 GN=Atl1 PE=1 SV=1;>sp|Q91YH5|ATLA3_MOUSE Atlastin-3 OS=Mus musculus (Mouse) OX=10090 GN=Atl3 PE=1 SV=1	ATL1;ATL3	1	1	-1.00285	0.00856207	0.0199462	FALSE	9	8	0.0540382
P51141;Q61062	P51141;Q61062	>sp|P51141|DVL1_MOUSE Segment polarity protein dishevelled homolog DVL-1 OS=Mus musculus (Mouse) OX=10090 GN=Dvl1 PE=1 SV=2;>sp|Q61062|DVL3_MOUSE Segment polarity protein dishevelled homolog DVL-3 OS=Mus musculus (Mouse) OX=10090 GN=Dvl3 PE=1 SV=2	DVL1;DVL3	1	1	-0.228611	0.0909443	0.149159	FALSE	8	7	0.0813758
Q7TT50	Q7TT50	>sp|Q7TT50|MRCKB_MOUSE Serine/threonine-protein kinase MRCK beta OS=Mus musculus (Mouse) OX=10090 GN=Cdc42bpb PE=1 SV=2	CDC42BPB	27	15	0.0386198	0.724092	0.789256	FALSE	202	181	0.0650868
P0DP60	P0DP60	>sp|P0DP60|LYNX1_MOUSE Ly-6/neurotoxin-like protein 1 OS=Mus musculus (Mouse) OX=10090 GN=Lynx1 PE=1 SV=1	LYNX1	1	1	-0.529503	0.000619498	0.00198577	TRUE	8	8	-0.127846
O70228;P98195	O70228;P98195	>sp|O70228|ATP9A_MOUSE Probable phospholipid-transporting ATPase IIA OS=Mus musculus (Mouse) OX=10090 GN=Atp9a PE=1 SV=3;>sp|P98195|ATP9B_MOUSE Probable phospholipid-transporting ATPase IIB OS=Mus musculus (Mouse) OX=10090 GN=Atp9b PE=1 SV=4	ATP9A;ATP9B	3	1	0.0139366	0.937479	0.953685	FALSE	22	15	0.609681
Q9JMA2	Q9JMA2	>sp|Q9JMA2|TGT_MOUSE Queuine tRNA-ribosyltransferase catalytic subunit 1 OS=Mus musculus (Mouse) OX=10090 GN=Qtrt1 PE=1 SV=2	QTRT1	2	1	0.214877	0.163225	0.24554	FALSE	18	12	0.641334
P97471	P97471	>sp|P97471|SMAD4_MOUSE Mothers against decapentaplegic homolog 4 OS=Mus musculus (Mouse) OX=10090 GN=Smad4 PE=1 SV=2	SMAD4	2	0					5	8	-1.05813
P52432	P52432	>sp|P52432|RPAC1_MOUSE DNA-directed RNA polymerases I and III subunit RPAC1 OS=Mus musculus (Mouse) OX=10090 GN=Polr1c PE=1 SV=3	POLR1C	4	1	0.723949	0.00100628	0.00302332	TRUE	37	14	1.7657
P19157	P19157	>sp|P19157|GSTP1_MOUSE Glutathione S-transferase P 1 OS=Mus musculus (Mouse) OX=10090 GN=Gstp1 PE=1 SV=2	GSTP1	9	5	-0.493511	8.34338e-06	4.80543e-05	TRUE	63	58	0.0190911
Q9D2C7	Q9D2C7	>sp|Q9D2C7|BI1_MOUSE Bax inhibitor 1 OS=Mus musculus (Mouse) OX=10090 GN=Tmbim6 PE=1 SV=1	TMBIM6	2	1	-0.506669	0.0247327	0.0497781	FALSE	11	14	-0.650024
Q64727	Q64727	>sp|Q64727|VINC_MOUSE Vinculin OS=Mus musculus (Mouse) OX=10090 GN=Vcl PE=1 SV=4	VCL	26	8	-0.726384	5.56663e-05	0.000244876	TRUE	144	175	-0.565516
G5E829	G5E829	>sp|G5E829|AT2B1_MOUSE Plasma membrane calcium-transporting ATPase 1 OS=Mus musculus (Mouse) OX=10090 GN=Atp2b1 PE=1 SV=1	ATP2B1	21	16	0.0626672	0.198015	0.287645	FALSE	177	151	0.175719
Q8BP67	Q8BP67	>sp|Q8BP67|RL24_MOUSE 60S ribosomal protein L24 OS=Mus musculus (Mouse) OX=10090 GN=Rpl24 PE=1 SV=2	RPL24	3	3	0.628498	5.85119e-05	0.000254649	TRUE	30	24	0.293811
P97470	P97470	>sp|P97470|PP4C_MOUSE Serine/threonine-protein phosphatase 4 catalytic subunit OS=Mus musculus (Mouse) OX=10090 GN=Ppp4c PE=1 SV=2	PPP4C	5	4	0.276815	0.0017497	0.00488796	TRUE	43	30	0.569544
Q8C0L8	Q8C0L8	>sp|Q8C0L8|COG5_MOUSE Conserved oligomeric Golgi complex subunit 5 OS=Mus musculus (Mouse) OX=10090 GN=Cog5 PE=1 SV=3	COG5	8	2	0.23966	0.0417325	0.0775094	FALSE	56	31	1.02895
P62852	P62852	>sp|P62852|RS25_MOUSE 40S ribosomal protein S25 OS=Mus musculus (Mouse) OX=10090 GN=Rps25 PE=1 SV=1	RPS25	5	5	0.57087	0.000443349	0.00148258	TRUE	50	39	0.353229
Q61166;Q8R001	Q61166;Q8R001	>sp|Q61166|MARE1_MOUSE Microtubule-associated protein RP/EB family member 1 OS=Mus musculus (Mouse) OX=10090 GN=Mapre1 PE=1 SV=3;>sp|Q8R001|MARE2_MOUSE Microtubule-associated protein RP/EB family member 2 OS=Mus musculus (Mouse) OX=10090 GN=Mapre2 PE=1 SV=1	MAPRE1;MAPRE2	1	1	-0.408436	0.0271769	0.0539355	FALSE	8	8	-0.18126
Q8VHR5	Q8VHR5	>sp|Q8VHR5|P66B_MOUSE Transcriptional repressor p66-beta OS=Mus musculus (Mouse) OX=10090 GN=Gatad2b PE=1 SV=1	GATAD2B	6	5	-0.0128829	0.897935	0.926514	FALSE	53	44	0.23217
Q3UFF7	Q3UFF7	>sp|Q3UFF7|LYPL1_MOUSE Lysophospholipase-like protein 1 OS=Mus musculus (Mouse) OX=10090 GN=Lyplal1 PE=1 SV=3	LYPLAL1	6	3	-0.496116	4.52465e-05	0.000205507	TRUE	44	46	-0.244696
Q3V0K9;Q99K51	Q3V0K9;Q99K51	>sp|Q3V0K9|PLSI_MOUSE Plastin-1 OS=Mus musculus (Mouse) OX=10090 GN=Pls1 PE=1 SV=1;>sp|Q99K51|PLST_MOUSE Plastin-3 OS=Mus musculus (Mouse) OX=10090 GN=Pls3 PE=1 SV=3	PLS1;PLS3	2	2	-0.617359	6.6204e-05	0.000282307	TRUE	20	16	0.286542
O54941	O54941	>sp|O54941|SMCE1_MOUSE SWI/SNF-related matrix-associated actin-dependent regulator of chromatin subfamily E member 1 OS=Mus musculus (Mouse) OX=10090 GN=Smarce1 PE=1 SV=1	SMARCE1	7	3	-0.0795257	0.566178	0.657081	FALSE	35	30	0.163717
A2AHC3	A2AHC3	>sp|A2AHC3|CAMP1_MOUSE Calmodulin-regulated spectrin-associated protein 1 OS=Mus musculus (Mouse) OX=10090 GN=Camsap1 PE=1 SV=1	CAMSAP1	8	1	0.15702	0.386313	0.491539	FALSE	37	35	-0.0862467
P67984	P67984	>sp|P67984|RL22_MOUSE 60S ribosomal protein L22 OS=Mus musculus (Mouse) OX=10090 GN=Rpl22 PE=1 SV=2	RPL22	3	3	0.505558	0.000687154	0.00217431	TRUE	30	24	0.293811
Q8K1Z0	Q8K1Z0	>sp|Q8K1Z0|COQ9_MOUSE Ubiquinone biosynthesis protein COQ9, mitochondrial OS=Mus musculus (Mouse) OX=10090 GN=Coq9 PE=1 SV=1	COQ9	6	5	0.36264	1.08429e-05	5.99628e-05	TRUE	55	44	0.299624
Q922P9	Q922P9	>sp|Q922P9|GLYR1_MOUSE Putative oxidoreductase GLYR1 OS=Mus musculus (Mouse) OX=10090 GN=Glyr1 PE=1 SV=1	GLYR1	6	4	0.27705	0.0170213	0.0363238	FALSE	56	41	0.481826
A0A286YCV9	A0A286YCV9	>tr|A0A286YCV9|A0A286YCV9_MOUSE Kinesin family member 13B OS=Mus musculus (Mouse) OX=10090 GN=Kif13b PE=1 SV=1	KIF13B	1	0					6	8	-0.623511
Q8BPM2	Q8BPM2	>sp|Q8BPM2|M4K5_MOUSE Mitogen-activated protein kinase kinase kinase kinase 5 OS=Mus musculus (Mouse) OX=10090 GN=Map4k5 PE=1 SV=2	MAP4K5	8	3	-0.0253188	0.777833	0.831594	FALSE	57	51	0.0650885
Q61234	Q61234	>sp|Q61234|SNTA1_MOUSE Alpha-1-syntrophin OS=Mus musculus (Mouse) OX=10090 GN=Snta1 PE=1 SV=1	SNTA1	5	2	-0.129325	0.325034	0.428368	FALSE	32	30	-0.0210588
P08556;P32883	P08556;P32883	>sp|P08556|RASN_MOUSE GTPase NRas OS=Mus musculus (Mouse) OX=10090 GN=Nras PE=1 SV=1;>sp|P32883|RASK_MOUSE GTPase KRas OS=Mus musculus (Mouse) OX=10090 GN=Kras PE=1 SV=1	NRAS;KRAS	1	1	-0.22139	0.0973476	0.15827	FALSE	10	8	0.266117
O70496	O70496	>sp|O70496|CLCN7_MOUSE H(+)/Cl(-) exchange transporter 7 OS=Mus musculus (Mouse) OX=10090 GN=Clcn7 PE=1 SV=1	CLCN7	5	4	-0.104855	0.354945	0.458826	FALSE	41	33	0.269214
Q9WV60	Q9WV60	>sp|Q9WV60|GSK3B_MOUSE Glycogen synthase kinase-3 beta OS=Mus musculus (Mouse) OX=10090 GN=Gsk3b PE=1 SV=2	GSK3B	9	8	-0.17765	0.010355	0.0236549	FALSE	83	68	0.252502
[truncated: 6,037 more rows]
