# Supplementary figures and images for: Rab10 regulates neuropeptide release by maintaining Ca2+ homeostasis and protein synthesis
Source: eLife journal article supplement (doi:10.7554/elife.94930), 2024-03-19

Culture #1

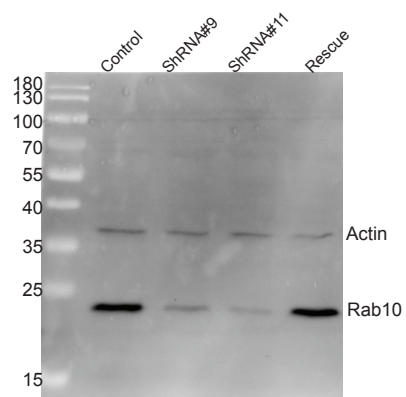

Culture #2

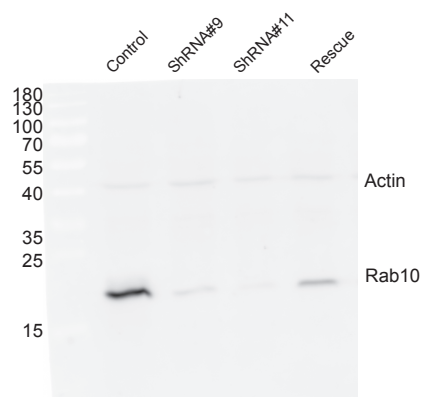

Culture #3

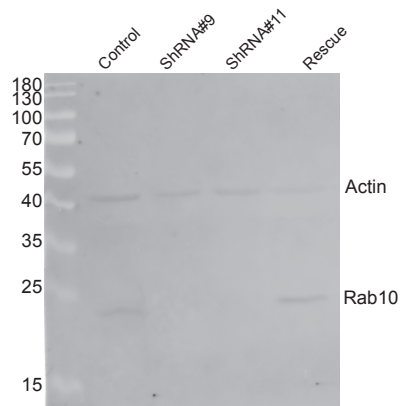

Culture #4\_Rab10

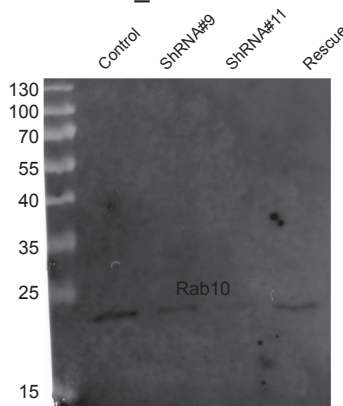

Culture #4\_Actin

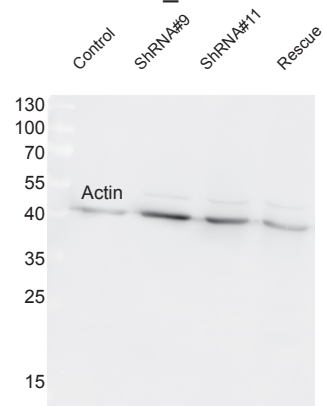

Supplement: fig1-data1 [file elife-94930-fig1-data1-v1.zip]

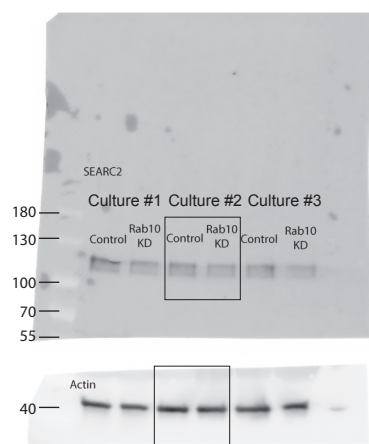

Supplement: fig5-data1 [file elife-94930-fig5-data1-v1.zip]

Culture #1

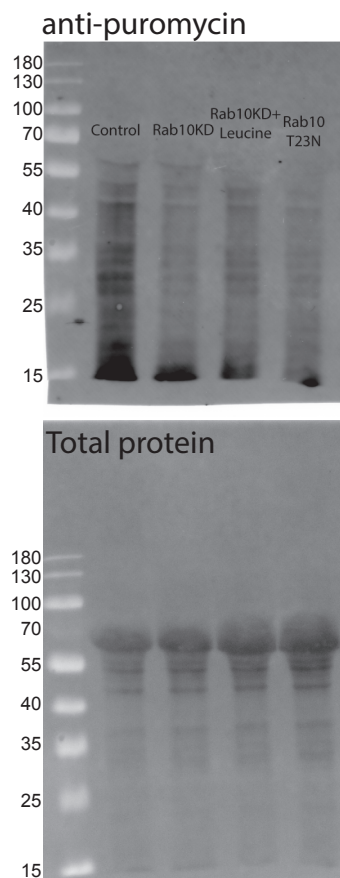

Culture #2

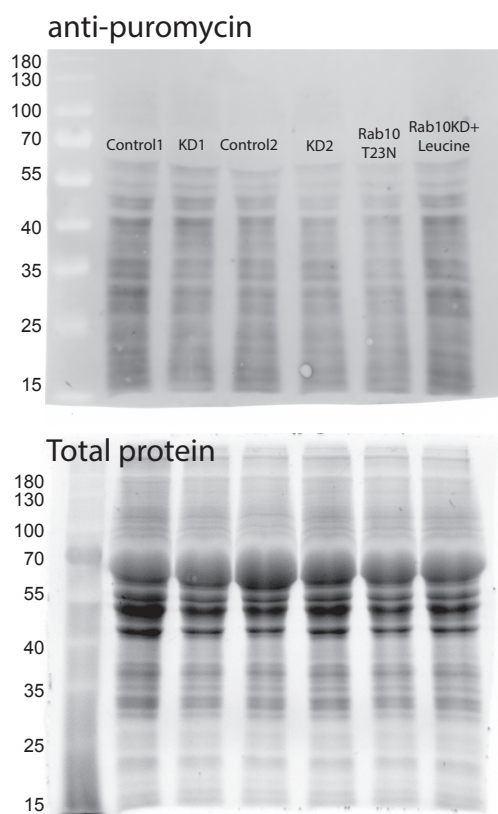

Culture #3

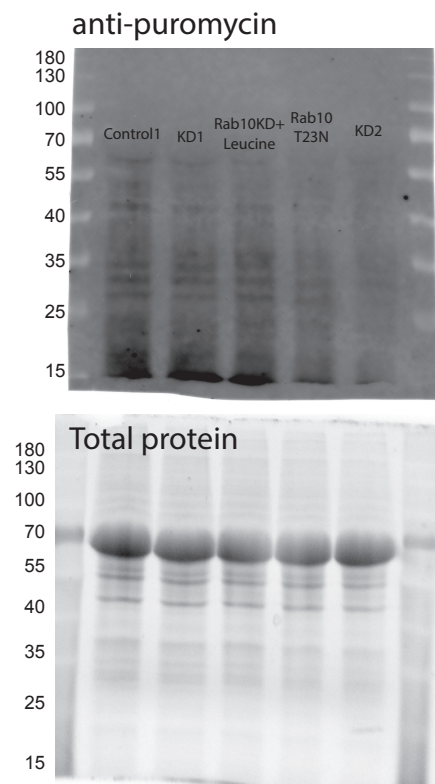

Supplement: fig8-data1 [file elife-94930-fig8-data1-v1.zip]

## WEEK1

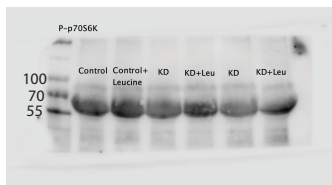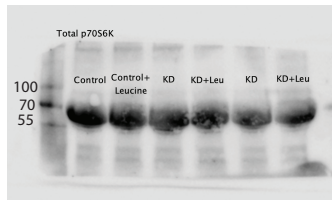

## WEEK2

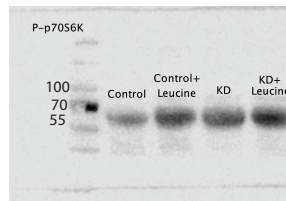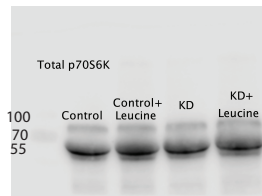

Supplement: fig8-figsupp1-data1 [file elife-94930-fig8-figsupp1-data1-v1.zip]
